# Supplementary material for: A Whole-Genome RNA Interference Screen Reveals a Role for Spry2 in Insulin Transcription and the Unfolded Protein Response
Source: Oxford University Press journal article supplement (doi:10.2337/db16-0962), 2017-02-28
Supplement: db160962supplementarydata2.xlsx [file db160962supplementarydata2.xlsx]

## Sheet: genes.fpkm_tracking
Supplemental Table 1: Cuffdiff output, mRNA-seq of sorted mouse beta cells, mouse islets, and MIN6 reporter line.
Sorted mouse beta cell and mouse islet data are from (Ku and Kim et al, 2012)
tracking_id	class_code	nearest_ref_id	gene_id	gene_short_name	tss_id	locus	length	coverage	beta_FPKM	beta_conf_lo	beta_conf_hi	beta_status	islet_FPKM	islet_conf_lo	islet_conf_hi	islet_status	MIN6_FPKM	MIN6_conf_lo	MIN6_conf_hi	MIN6_status
0610007C21Rik	-	-	0610007C21Rik	0610007C21Rik	TSS13315	chr5:31338408-31356996	-	-	59.3142	49.1068	69.5216	OK	45.9579	38.1269	53.7888	OK	87.5512	71.4828	103.62	OK
0610007L01Rik	-	-	0610007L01Rik	0610007L01Rik	TSS12827,TSS18534	chr5:130695613-130719635	-	-	60.6349	47.5356	73.7341	OK	40.2664	32.1381	48.3948	OK	47.5344	37.2535	57.8153	OK
0610007P08Rik	-	-	0610007P08Rik	0610007P08Rik	TSS18856,TSS884	chr13:63916627-64001609	-	-	7.66943	6.37248	8.96639	OK	6.39806	5.29339	7.50273	OK	6.15154	5.16438	7.1387	OK
0610007P14Rik	-	-	0610007P14Rik	0610007P14Rik	TSS2302	chr12:87156404-87165495	-	-	9.31315	7.46621	11.1601	OK	8.90236	7.23597	10.5688	OK	17.8289	14.9514	20.7064	OK
0610007P22Rik	-	-	0610007P22Rik	0610007P22Rik	TSS5853	chr17:25377114-25393309	-	-	8.13987	0	17.3696	OK	5.99045	0	16.3529	OK	18.9298	15.8748	21.9848	OK
0610008F07Rik	-	-	0610008F07Rik	0610008F07Rik	TSS2925	chr2:163318053-163367457	-	-	0.0332081	0	0.0900467	OK	0.0078912	0	0.0376721	OK	0	0	0	OK
0610009B22Rik	-	-	0610009B22Rik	0610009B22Rik	TSS15727	chr11:51498886-51502136	-	-	19.0982	15.5834	22.613	OK	12.1372	9.77525	14.4991	OK	30.5352	25.647	35.4235	OK
0610009D07Rik	-	-	0610009D07Rik	0610009D07Rik	TSS23583	chr12:4824413-4834465	-	-	32.9448	27.7637	38.1259	OK	19.9941	16.7996	23.1886	OK	30.8739	26.0444	35.7034	OK
0610009O20Rik	-	-	0610009O20Rik	0610009O20Rik	TSS16023	chr18:38398058-38422283	-	-	20.2087	16.9612	23.4563	OK	16.5507	13.8877	19.2138	OK	24.9602	20.725	29.1955	OK
0610010B08Rik	-	-	0610010B08Rik	0610010B08Rik	TSS15132,TSS19547,TSS20272,TSS22571	chr2:175639522-175655901	-	-	1.14052	0.80476	1.47627	FAIL	1.10163	0.8139	1.38935	OK	0.506599	0.341585	0.671612	OK
0610010F05Rik	-	-	0610010F05Rik	0610010F05Rik	TSS12410	chr11:23473775-23533631	-	-	6.34885	5.3316	7.36609	OK	5.14823	4.33418	5.96228	OK	3.77287	3.1524	4.39333	OK
0610010K14Rik	-	-	0610010K14Rik	0610010K14Rik	TSS11348	chr11:70048705-70051416	-	-	17.1155	13.4396	20.7915	OK	9.64143	7.23536	12.0475	OK	23.2971	18.4142	28.18	OK
0610010O12Rik	-	-	0610010O12Rik	0610010O12Rik	TSS9346	chr18:36508277-36553024	-	-	16.4901	12.9885	19.9916	OK	11.88	9.16945	14.5906	OK	15.4238	12.1501	18.6974	OK
0610011F06Rik	-	-	0610011F06Rik	0610011F06Rik	TSS16494	chr17:26012444-26014108	-	-	40.4864	34.0383	46.9346	OK	28.9747	24.27	33.6793	OK	30.4414	25.5292	35.3536	OK
0610011L14Rik	-	-	0610011L14Rik	0610011L14Rik	TSS18899	chr2:156373311-156394708	-	-	7.55854	6.29999	8.81709	OK	5.06873	4.22451	5.91295	OK	8.30437	6.91391	9.69483	OK
0610012G03Rik	-	-	0610012G03Rik	0610012G03Rik	TSS16028	chr16:31947136-31948607	-	-	6.76834	5.38724	8.14944	OK	4.36057	3.38596	5.33519	OK	15.6397	13.1229	18.1565	OK
0610012H03Rik	-	-	0610012H03Rik	0610012H03Rik	TSS17674	chr2:105064498-105220017	-	-	0	0	0	OK	0.0461462	0.00193672	0.0903558	OK	0	0	0	OK
0610030E20Rik	-	-	0610030E20Rik	0610030E20Rik	TSS17234	chr6:72297310-72303154	-	-	3.12955	2.5744	3.6847	OK	3.24653	2.70673	3.78633	OK	2.51277	2.07264	2.95291	OK
0610031J06Rik	-	-	0610031J06Rik	0610031J06Rik	TSS15007	chr3:88128944-88132553	-	-	56.0025	46.7838	65.2211	OK	37.3415	31.3969	43.2861	OK	118.461	93.7388	143.183	OK
0610037L13Rik	-	-	0610037L13Rik	0610037L13Rik	TSS14348	chr4:107562503-107570407	-	-	9.6143	7.89027	11.3383	OK	6.54008	5.30325	7.77691	OK	9.96743	8.28415	11.6507	OK
0610037P05Rik	-	-	0610037P05Rik	0610037P05Rik	TSS12097	chr16:14299336-14317425	-	-	12.1776	10.0638	14.2913	OK	9.06153	7.48901	10.634	OK	11.8425	9.88135	13.8036	OK
0610038B21Rik	-	-	0610038B21Rik	0610038B21Rik	TSS879	chr8:79774264-80042477	-	-	0.0323801	0	0.145121	OK	0.041326	0	0.130164	OK	0.514884	0.0247868	1.00498	OK
0610039K10Rik	-	-	0610039K10Rik	0610039K10Rik	TSS16889	chr2:163449008-163471536	-	-	0.16341	0	1.29752	OK	0.120145	0	1.18766	OK	0	0	0	OK
0610040B10Rik	-	-	0610040B10Rik	0610040B10Rik	TSS23052	chr5:144090986-144094383	-	-	2.89589	1.60483	4.18696	OK	2.00872	1.06576	2.95167	OK	1.49814	0.689032	2.30726	OK
0610040J01Rik	-	-	0610040J01Rik	0610040J01Rik	TSS23946	chr5:64203733-64290858	-	-	53.4363	44.3042	62.5684	OK	36.315	30.3081	42.322	OK	49.5994	40.8165	58.3822	OK
0910001L09Rik	-	-	0910001L09Rik	0910001L09Rik	TSS9076	chr5:138696709-138700623	-	-	19.819	16.2992	23.3388	OK	12.1996	9.80712	14.5921	OK	44.5217	37.5556	51.4877	OK
100043387	-	-	100043387	100043387	TSS6645,TSS9099	chr2:176080794-176097179	-	-	0.0890399	0	0.350514	OK	0	0	0	OK	0	0	0	OK
1100001G20Rik	-	-	1100001G20Rik	1100001G20Rik	TSS18667	chr11:83560441-83566148	-	-	0	0	0	OK	0	0	0	OK	0	0	0	OK
1110001A16Rik	-	-	1110001A16Rik	1110001A16Rik	TSS19447	chr17:79315838-79336410	-	-	5.07206	3.23853	6.9056	OK	3.00714	1.85732	4.15696	OK	3.83062	2.19085	5.47039	OK
1110001J03Rik	-	-	1110001J03Rik	1110001J03Rik	TSS17391	chr6:38484860-38489449	-	-	12.8174	9.24666	16.3882	OK	9.09651	6.35474	11.8383	OK	51.2976	42.1309	60.4643	OK
1110002B05Rik	-	-	1110002B05Rik	1110002B05Rik	TSS11872	chr12:55746360-55757559	-	-	23.1477	19.4677	26.8276	OK	17.3461	14.593	20.0993	OK	18.8711	15.8867	21.8555	OK
1110002L01Rik	-	-	1110002L01Rik	1110002L01Rik	TSS332	chr12:3365131-3426747	-	-	2.81347	1.92137	3.70556	OK	1.87775	1.2347	2.5208	OK	1.07589	0.608699	1.54309	OK
1110002N22Rik	-	-	1110002N22Rik	1110002N22Rik	TSS8165	chr11:79950179-79955655	-	-	3.14847	2.26206	4.03487	OK	2.22903	1.57836	2.87971	OK	5.12938	4.01066	6.2481	OK
1110003E01Rik	-	-	1110003E01Rik	1110003E01Rik	TSS19494	chr5:65839993-65884074	-	-	99.2513	78.8482	119.654	OK	61.961	50.1313	73.7907	OK	47.5119	39.0641	55.9597	OK
1110004E09Rik	-	-	1110004E09Rik	1110004E09Rik	TSS18614	chr16:90926055-90935094	-	-	8.5528	6.79689	10.3087	OK	6.03086	4.72401	7.33771	OK	10.8998	8.89385	12.9058	OK
1110004F10Rik	-	-	1110004F10Rik	1110004F10Rik	TSS19086	chr7:123236893-123248724	-	-	21.2098	17.8332	24.5865	OK	14.4358	12.1104	16.7611	OK	35.2209	29.6366	40.8051	OK
1110005A03Rik	-	-	1110005A03Rik	1110005A03Rik	TSS6004	chr11:116704828-116711054	-	-	3.6397	2.574	4.70539	OK	2.1168	1.41966	2.81393	OK	1.58855	1.01202	2.16509	OK
1110006O24Rik	-	-	1110006O24Rik	1110006O24Rik	TSS8963	chr5:116081057-116081825	-	-	3.20159	2.11207	4.29112	OK	2.48082	1.5915	3.37014	OK	5.21033	3.69888	6.72178	OK
1110007A13Rik	-	-	1110007A13Rik	1110007A13Rik	TSS16165	chr7:135839972-135883943	-	-	6.74496	5.67323	7.81669	OK	5.38056	4.52894	6.23219	OK	14.4547	12.0809	16.8286	OK
1110007C09Rik	-	-	1110007C09Rik	1110007C09Rik	TSS23815	chr13:49298319-49311395	-	-	8.7352	6.68005	10.7903	OK	6.97436	5.25305	8.69567	OK	53.7818	45.3736	62.19	OK
1110008F13Rik	-	-	1110008F13Rik	1110008F13Rik	TSS7354	chr2:156688857-156712814	-	-	13.6161	11.064	16.1683	OK	10.879	8.78793	12.97	OK	62.7329	52.5691	72.8968	OK
1110008J03Rik	-	-	1110008J03Rik	1110008J03Rik	TSS11298	chr5:121059068-121062598	-	-	2.73766	1.95042	3.52489	OK	2.03619	1.42034	2.65204	OK	6.55926	5.31087	7.80766	OK
1110008L16Rik	-	-	1110008L16Rik	1110008L16Rik	TSS20066	chr12:56381800-56483478	-	-	2.89386	2.11907	3.66864	OK	2.19425	1.61972	2.76879	OK	1.43049	0.96546	1.89552	OK
1110008P14Rik	-	-	1110008P14Rik	1110008P14Rik	TSS5554	chr2:32234620-32237435	-	-	56.776	47.7947	65.7573	OK	38.4744	32.2045	44.7443	OK	82.8715	69.9032	95.8398	OK
1110012D08Rik	-	-	1110012D08Rik	1110012D08Rik	TSS18925	chr10:128227965-128241426	-	-	1.65871	1.19198	2.12544	OK	1.99953	1.50067	2.4984	OK	2.0468	1.54738	2.54621	OK
1110012J17Rik	-	-	1110012J17Rik	1110012J17Rik	TSS24056	chr17:66686321-66799090	-	-	12.7923	10.5911	14.9935	OK	12.9228	10.6682	15.1774	OK	17.93	14.582	21.278	OK
1110012L19Rik	-	-	1110012L19Rik	1110012L19Rik	TSS8151	chrX:67639087-67642591	-	-	2.82077	1.94077	3.70078	OK	1.75767	1.1628	2.35254	OK	3.81899	2.82389	4.8141	OK
1110014N23Rik	-	-	1110014N23Rik	1110014N23Rik	TSS21733	chr19:6062820-6077187	-	-	15.366	12.8076	17.9244	OK	13.6885	11.3744	16.0025	OK	21.1972	17.4018	24.9926	OK
1110017D15Rik	-	-	1110017D15Rik	1110017D15Rik	TSS21521,TSS37	chr4:41452041-41464366	-	-	0.589515	0.152183	1.02685	OK	0.489167	0.128283	0.850051	OK	0.280869	0.106476	0.455261	OK
1110017F19Rik	-	-	1110017F19Rik	1110017F19Rik	TSS13827	chr11:115753990-115794320	-	-	0.935636	0.243488	1.62778	OK	1.65627	0.742952	2.56959	OK	0.57226	0.0168277	1.12769	OK
1110018G07Rik	-	-	1110018G07Rik	1110018G07Rik	TSS14604	chr12:86259098-86311836	-	-	12.1328	10.1848	14.0808	OK	10.4784	8.78311	12.1736	OK	10.5071	8.79591	12.2182	OK
1110018J18Rik	-	-	1110018J18Rik	1110018J18Rik	TSS12507	chr13:64393143-64414018	-	-	18.9296	15.6562	22.203	OK	13.6617	11.2359	16.0875	OK	7.78383	6.12667	9.44098	OK
1110020A21Rik	-	-	1110020A21Rik	1110020A21Rik	TSS10220,TSS2316	chr17:85316521-85423332	-	-	3.98602	0	11.342	OK	2.42938	0	5.61078	OK	0.656986	0	1.56732	OK
1110020G09Rik	-	-	1110020G09Rik	1110020G09Rik	TSS22072	chr15:9001008-9040244	-	-	3.36754	2.68221	4.05286	OK	3.30737	2.64068	3.97406	OK	1.86861	1.40765	2.32958	OK
1110021J02Rik	-	-	1110021J02Rik	1110021J02Rik	TSS13259	chr17:29797545-29853962	-	-	16.0375	9.91748	22.1575	OK	13.0636	7.89856	18.2287	OK	10.6539	5.53143	15.7764	OK
1110021L09Rik	-	-	1110021L09Rik	1110021L09Rik	TSS3312	chr10:23516791-23547774	-	-	3.05947	2.41985	3.6991	OK	3.01585	2.4307	3.60101	OK	5.84299	4.88048	6.8055	OK
1110028C15Rik	-	-	1110028C15Rik	1110028C15Rik	TSS12071	chr1:66747466-66864169	-	-	5.12077	4.0727	6.16883	OK	4.46016	3.5172	5.40311	OK	1.30997	0.93853	1.68141	OK
1110031I02Rik	-	-	1110031I02Rik	1110031I02Rik	TSS5987	chr11:121038906-121090579	-	-	5.83502	4.08339	7.58665	OK	4.99764	3.45849	6.53679	OK	49.7783	38.7793	60.7774	OK
1110032A03Rik	-	-	1110032A03Rik	1110032A03Rik	TSS16806	chr9:50570932-50576257	-	-	11.3293	9.43762	13.221	OK	6.57547	5.41667	7.73428	OK	5.25541	4.27461	6.23621	OK
1110032A04Rik	-	-	1110032A04Rik	1110032A04Rik	TSS3836	chr3:69623460-69663818	-	-	0.0475244	0	0.0959537	OK	0.0396708	0.00267707	0.0766644	OK	0	0	0	OK
1110032F04Rik	-	-	1110032F04Rik	1110032F04Rik	TSS23350	chr3:68673507-68676085	-	-	0.00654791	0	0.0197277	OK	0	0	0	OK	0	0	0	OK
1110034A24Rik	-	-	1110034A24Rik	1110034A24Rik	TSS20417	chr12:70290824-70300855	-	-	2.16221	1.46275	2.86168	OK	1.75962	1.14865	2.37059	OK	7.27625	5.89628	8.65622	OK
1110034B05Rik	-	-	1110034B05Rik	1110034B05Rik	TSS18425	chr1:57445087-57472802	-	-	3.39115	2.1652	4.6171	OK	2.7369	1.98097	3.49284	OK	2.57499	1.77111	3.37888	OK
1110034G24Rik	-	-	1110034G24Rik	1110034G24Rik	TSS1041	chr2:132516018-132576791	-	-	6.74511	5.3791	8.11111	OK	3.38242	2.57661	4.18824	OK	1.9392	1.37457	2.50382	OK
1110037F02Rik	-	-	1110037F02Rik	1110037F02Rik	TSS6669	chr4:11413104-11478290	-	-	7.98194	6.71773	9.24615	OK	7.32911	6.14395	8.51427	OK	6.98222	5.85945	8.10499	OK
1110038B12Rik	-	-	1110038B12Rik	1110038B12Rik	TSS5757,TSS5758	chr17:35087180-35089416	-	-	3.88006	2.21278	5.54735	OK	2.36731	1.17787	3.55675	OK	21.2752	15.5585	26.992	OK
1110038D17Rik	-	-	1110038D17Rik	1110038D17Rik	TSS8885	chr10:74969558-74980067	-	-	9.00591	7.56475	10.4471	OK	7.56554	6.3555	8.77558	OK	14.0927	11.8779	16.3074	OK
1110038F14Rik	-	-	1110038F14Rik	1110038F14Rik	TSS8748	chr15:76778973-76781161	-	-	10.9448	8.81806	13.0715	OK	8.07191	6.41076	9.73307	OK	9.59391	7.68222	11.5056	OK
1110049F12Rik	-	-	1110049F12Rik	1110049F12Rik	TSS19424	chr4:135531516-135543159	-	-	27.542	23.2329	31.8512	OK	17.8608	15.031	20.6905	OK	43.4867	36.4813	50.4922	OK
1110051M20Rik	-	-	1110051M20Rik	1110051M20Rik	TSS11346	chr2:91117984-91284799	-	-	8.78181	7.27735	10.2863	OK	7.17907	5.94887	8.40927	OK	10.9936	9.23888	12.7482	OK
1110054O05Rik	-	-	1110054O05Rik	1110054O05Rik	TSS8635	chr4:59782518-59796727	-	-	1.79071	1.36109	2.22034	OK	1.47093	1.12606	1.8158	OK	3.47576	2.85822	4.0933	OK
1110057K04Rik	-	-	1110057K04Rik	1110057K04Rik	TSS12998,TSS16076,TSS16077	chr12:8214912-8292565	-	-	11.0965	9.07186	13.1212	OK	7.38652	5.99381	8.77924	OK	7.64563	6.19872	9.09255	OK
1110058L19Rik	-	-	1110058L19Rik	1110058L19Rik	TSS21213	chr1:24002777-24012479	-	-	12.4822	9.65063	15.3137	OK	8.49075	6.46369	10.5178	OK	12.9458	10.1981	15.6935	OK
1110059E24Rik	-	-	1110059E24Rik	1110059E24Rik	TSS6259	chr19:21671802-21727281	-	-	8.33034	6.73518	9.92551	OK	5.39992	4.33035	6.46948	OK	6.7047	5.45555	7.95386	OK
1110059G10Rik	-	-	1110059G10Rik	1110059G10Rik	TSS2347	chr9:122854206-122860118	-	-	1.58446	1.19387	1.97506	OK	1.1267	0.847455	1.40595	OK	1.22365	0.929181	1.51812	OK
1110059M19Rik	-	-	1110059M19Rik	1110059M19Rik	TSS1621	chrX:42444080-42445967	-	-	0.00428	0	0.0183323	OK	0	0	0	OK	0	0	0	OK
1110065P20Rik	-	-	1110065P20Rik	1110065P20Rik	TSS16480	chr4:124479792-124527974	-	-	21.5499	14.3656	28.7342	OK	15.3708	9.44645	21.2952	OK	45.9459	34.6187	57.2731	OK
1110067D22Rik	-	-	1110067D22Rik	1110067D22Rik	TSS10469	chr11:20723357-20731111	-	-	23.2957	19.4419	27.1494	OK	14.6075	12.2391	16.9759	OK	4.11456	3.43234	4.79678	OK
1190002H23Rik	-	-	1190002H23Rik	1190002H23Rik	TSS9971	chr14:79688556-79701442	-	-	0.239973	0.0633625	0.416584	OK	5.55772	4.13192	6.98352	OK	0	0	0	OK
1190002N15Rik	-	-	1190002N15Rik	1190002N15Rik	TSS11247	chr9:94418282-94438500	-	-	7.62537	6.41583	8.83491	OK	7.92544	6.68647	9.16442	OK	4.0579	3.38401	4.73179	OK
1190003J15Rik	-	-	1190003J15Rik	1190003J15Rik	TSS5683	chr7:148021394-148023867	-	-	1.01644	0.498348	1.53454	OK	1.6746	0.978945	2.37025	OK	0.0579141	0	0.129252	OK
1190003K10Rik	-	-	1190003K10Rik	1190003K10Rik	TSS7104	chr13:64582553-64599100	-	-	0	0	0	OK	0.0155834	0	0.0403016	OK	0	0	0	OK
1190005F20Rik	-	-	1190005F20Rik	1190005F20Rik	TSS7316	chr1:153275777-153305313	-	-	11.8223	9.95845	13.6862	OK	8.53087	7.17888	9.88286	OK	8.41369	7.07714	9.75025	OK
1190005I06Rik	-	-	1190005I06Rik	1190005I06Rik	TSS13558	chr8:123132501-123158282	-	-	0.262402	0.064929	0.459875	OK	0.218765	0.0498179	0.387712	OK	0.443684	0.16511	0.722258	OK
1190007F08Rik	-	-	1190007F08Rik	1190007F08Rik	TSS4675	chr4:153385911-153400153	-	-	12.2105	9.29118	15.1298	OK	8.23524	6.35317	10.1173	OK	6.0762	3.85497	8.29742	OK
1190007I07Rik	-	-	1190007I07Rik	1190007I07Rik	TSS7476	chr10:82082595-82085973	-	-	4.68643	3.01118	6.36169	OK	3.94399	2.50139	5.3866	OK	3.77913	2.21202	5.34625	OK
1200009I06Rik	-	-	1200009I06Rik	1200009I06Rik	TSS21771	chr12:112655640-112669394	-	-	0.070571	0.0196539	0.121488	OK	0.198969	0.101843	0.296094	OK	0.0107677	0	0.0240313	OK
1200011I18Rik	-	-	1200011I18Rik	1200011I18Rik	TSS15021	chr14:76486038-76510622	-	-	5.38131	4.52998	6.23263	OK	4.87135	4.10889	5.63381	OK	2.51545	2.09385	2.93704	OK
1200011M11Rik	-	-	1200011M11Rik	1200011M11Rik	TSS16870	chr11:86891233-86900279	-	-	2.61349	2.06817	3.15881	OK	2.36167	1.89091	2.83243	OK	6.70064	5.63563	7.76564	OK
1200014J11Rik	-	-	1200014J11Rik	1200014J11Rik	TSS20330	chr11:72861368-72897081	-	-	3.53942	2.96225	4.11659	OK	3.33539	2.8046	3.86619	OK	2.64432	2.21316	3.07548	OK
1200016B10Rik	-	-	1200016B10Rik	1200016B10Rik	TSS1146	chr1:153214828-153275565	-	-	3.91653	3.22097	4.61209	OK	3.08142	2.55099	3.61185	OK	1.72024	1.36973	2.07075	OK
1300001I01Rik	-	-	1300001I01Rik	1300001I01Rik	TSS14362	chr11:74462996-74484349	-	-	16.4171	13.6573	19.1769	OK	14.9816	12.43	17.5333	OK	19.1134	15.6223	22.6045	OK
1300002K09Rik	-	-	1300002K09Rik	1300002K09Rik	TSS9652	chr4:45861818-45899880	-	-	0.00930831	0	0.0215063	OK	0.110286	0.0519576	0.168615	OK	0.00750333	0	0.0167458	OK
1300010F03Rik	-	-	1300010F03Rik	1300010F03Rik	TSS22626	chr14:79248984-79602117	-	-	16.5791	13.6451	19.5132	OK	15.3081	12.3704	18.2457	OK	13.2457	10.687	15.8045	OK
1300014I06Rik	-	-	1300014I06Rik	1300014I06Rik	TSS21435	chr13:34719709-34744550	-	-	0.0272991	0	0.0607065	OK	0.28621	0.141165	0.431255	OK	0	0	0	OK
1300017J02Rik	-	-	1300017J02Rik	1300017J02Rik	TSS17397	chr9:103152859-103190627	-	-	0.00158428	0	0.00762308	OK	0.0178681	0	0.0379048	OK	0.0263846	0.000644128	0.0521251	OK
1300018I17Rik	-	-	1300018I17Rik	1300018I17Rik	TSS1192	chr8:125766255-125778075	-	-	7.24127	6.04492	8.43762	OK	6.37428	5.3219	7.42667	OK	8.41837	7.08207	9.75467	OK
1300018J18Rik	-	-	1300018J18Rik	1300018J18Rik	TSS19588	chr15:88919536-88953580	-	-	11.0626	8.55918	13.5659	OK	9.66255	7.37649	11.9486	OK	12.063	8.59204	15.5339	OK
1500001M20Rik	-	-	1500001M20Rik	1500001M20Rik	TSS13309	chr6:114954398-114987892	-	-	1.46986	0.926484	2.01324	OK	1.18006	0.73986	1.62025	OK	4.38297	3.32822	5.43772	OK
1500002O20Rik	-	-	1500002O20Rik	1500002O20Rik	TSS20488	chr7:25184646-25207796	-	-	7.90684	6.56891	9.24477	OK	5.86641	4.83528	6.89754	OK	10.0898	8.48593	11.6936	OK
1500003O03Rik	-	-	1500003O03Rik	1500003O03Rik	TSS22410	chr2:119373442-119412758	-	-	28.3964	23.8036	32.9892	OK	19.6945	16.5534	22.8355	OK	21.6023	18.1114	25.0931	OK
1500004A13Rik	-	-	1500004A13Rik	1500004A13Rik	TSS18759	chr3:88580978-88636409	-	-	1.47589	0.640723	2.31106	OK	1.82349	0.955591	2.69138	OK	1.65897	0.882959	2.43498	OK
1500009L16Rik	-	-	1500009L16Rik	1500009L16Rik	TSS13379	chr10:83185609-83225507	-	-	3.08057	2.17935	3.98179	OK	3.00291	2.19249	3.81333	OK	14.2603	11.8728	16.6478	OK
1500010J02Rik	-	-	1500010J02Rik	1500010J02Rik	TSS11435	chr11:68829412-68849975	-	-	3.60587	2.92132	4.29043	OK	3.81883	3.08915	4.54851	OK	17.2771	14.4262	20.128	OK
1500011B03Rik	-	-	1500011B03Rik	1500011B03Rik	TSS1922	chr5:115258204-115263985	-	-	31.6058	24.9779	38.2338	OK	20.0612	15.6765	24.4459	OK	24.6158	19.0607	30.1709	OK
1500011H22Rik	-	-	1500011H22Rik	1500011H22Rik	TSS12222	chr5:122814592-122821972	-	-	23.5031	19.6447	27.3614	OK	13.5849	11.2182	15.9515	OK	54.0933	45.4715	62.7152	OK
1500011K16Rik	-	-	1500011K16Rik	1500011K16Rik	TSS6175	chr2:127617113-127618224	-	-	11.0582	8.63825	13.4782	OK	7.18456	5.51853	8.85059	OK	9.38757	7.32616	11.449	OK
1500012F01Rik	-	-	1500012F01Rik	1500012F01Rik	TSS23305	chr2:166861296-166891362	-	-	7.65333	0.292909	15.0138	OK	6.29974	0	13.1027	OK	5.70899	2.8426	8.57538	OK
1500015A07Rik	-	-	1500015A07Rik	1500015A07Rik	TSS19600	chr18:61886043-61887907	-	-	2.68301	1.9867	3.37931	OK	2.62479	1.99494	3.25463	OK	3.18443	2.4619	3.90697	OK
1500015O10Rik	-	-	1500015O10Rik	1500015O10Rik	TSS7172	chr1:43787446-43799409	-	-	0.0215515	0	0.0596231	OK	0.054879	0	0.116419	OK	0	0	0	OK
1500017E21Rik	-	-	1500017E21Rik	1500017E21Rik	TSS11739	chr19:36629128-36763969	-	-	0.711073	0.380536	1.04161	OK	0.643587	0.381756	0.905417	OK	0	0	0	OK
1500031L02Rik	-	-	1500031L02Rik	1500031L02Rik	TSS19562	chr16:32099887-32108140	-	-	10.7368	8.91019	12.5635	OK	6.54303	5.36572	7.72033	OK	10.8072	9.04385	12.5706	OK
1500032L24Rik	-	-	1500032L24Rik	1500032L24Rik	TSS19103	chr15:82176475-82179492	-	-	75.4804	63.5607	87.4	OK	49.8181	41.8207	57.8156	OK	188.042	156.566	219.518	OK
1520402A15Rik	-	-	1520402A15Rik	1520402A15Rik	TSS9113	chr4:115809332-115817221	-	-	1.9716	1.3484	2.59481	OK	2.00665	1.40633	2.60698	OK	2.77308	2.03551	3.51066	OK
1600002H07Rik	-	-	1600002H07Rik	1600002H07Rik	TSS8090	chr17:24352000-24357714	-	-	1.61762	1.15122	2.08403	OK	1.25903	0.890732	1.62734	OK	6.58796	5.46415	7.71176	OK
1600002K03Rik	-	-	1600002K03Rik	1600002K03Rik	TSS4185	chr10:79635688-79637864	-	-	7.10251	5.10671	9.09831	OK	4.5841	3.15429	6.0139	OK	7.07092	5.13668	9.00516	OK
1600012F09Rik	-	-	1600012F09Rik	1600012F09Rik	TSS9203	chr13:18078473-18085185	-	-	4.82604	3.99425	5.65783	OK	3.26803	2.69984	3.83621	OK	3.59999	2.98311	4.21688	OK
1600012H06Rik	-	-	1600012H06Rik	1600012H06Rik	TSS18728	chr17:15080188-15098237	-	-	13.2878	10.8461	15.7296	OK	8.67991	6.94572	10.4141	OK	6.59265	4.78864	8.39666	OK
1600014C10Rik	-	-	1600014C10Rik	1600014C10Rik	TSS11996,TSS13838	chr7:38968235-38982584	-	-	6.82938	5.68809	7.97067	OK	4.48499	3.70983	5.26015	OK	8.87392	7.45175	10.2961	OK
1600014K23Rik	-	-	1600014K23Rik	1600014K23Rik	TSS12437	chrX:82495015-82515630	-	-	0	0	0	OK	0	0	0	OK	0	0	0	OK
1600015I10Rik	-	-	1600015I10Rik	1600015I10Rik	TSS14409	chr6:48879894-48883686	-	-	0	0	0	OK	0.0229386	0.00080446	0.0450728	OK	0	0	0	OK
1600016N20Rik	-	-	1600016N20Rik	1600016N20Rik	TSS16262	chr7:148380028-148399979	-	-	2.92224	2.10381	3.74067	OK	2.47702	1.79563	3.15842	OK	0.589075	0.296164	0.881985	OK
1600021P15Rik	-	-	1600021P15Rik	1600021P15Rik	TSS390	chr16:28826261-28929784	-	-	3.09259	2.46802	3.71716	OK	2.54465	2.03478	3.05452	OK	2.52855	2.02411	3.03299	OK
1600027N09Rik	-	-	1600027N09Rik	1600027N09Rik	TSS13069	chr2:180316008-180320339	-	-	2.73617	1.9019	3.57043	OK	2.2991	1.58657	3.01164	OK	4.65225	3.50004	5.80446	OK
1600029D21Rik	-	-	1600029D21Rik	1600029D21Rik	TSS13457	chr9:50302629-50313744	-	-	2.08782	1.50308	2.67256	OK	1.41905	1.00713	1.83098	OK	0.0885437	0.0277172	0.14937	OK
1600029I14Rik	-	-	1600029I14Rik	1600029I14Rik	TSS15836	chr9:99356661-99469318	-	-	0.0741942	0	0.392265	OK	0.117772	0	0.508629	OK	0.463328	0	1.25463	OK
1600029O15Rik	-	-	1600029O15Rik	1600029O15Rik	TSS12883	chr9:58044103-58056615	-	-	0.00738173	0	0.0283413	OK	0.0233525	0	0.0645717	OK	0	0	0	OK
1700001C02Rik	-	-	1700001C02Rik	1700001C02Rik	TSS21095	chr5:30768449-30786460	-	-	0.141073	0.0100356	0.272111	OK	0.597829	0.267157	0.9285	OK	0	0	0	OK
1700001C19Rik	-	-	1700001C19Rik	1700001C19Rik	TSS1974,TSS21415	chr17:47549682-47607587	-	-	0.431299	0	0.997921	OK	0.332858	0	0.728588	OK	0.0365305	0	0.107748	OK
1700001F09Rik	-	-	1700001F09Rik	1700001F09Rik	TSS20570	chr14:44020916-44026344	-	-	0	0	0	OK	0	0	0	OK	0	0	0	OK
1700001G17Rik	-	-	1700001G17Rik	1700001G17Rik	TSS17803	chr1:33726668-33727557	-	-	0.531812	0.228014	0.835611	OK	0.366834	0.137268	0.5964	OK	1.67474	0.996084	2.35339	OK
1700001J03Rik	-	-	1700001J03Rik	1700001J03Rik	TSS3678	chr5:146994025-146996880	-	-	0.245899	0.0581096	0.433687	OK	0.284458	0.0946148	0.4743	OK	0	0	0	OK
1700001J11Rik	-	-	1700001J11Rik	1700001J11Rik	TSS6352	chr9:39858142-39860610	-	-	0.129828	0.050018	0.209637	OK	0.0992218	0.0384636	0.15998	OK	0.0446144	0.00979214	0.0794367	OK
1700001K19Rik	-	-	1700001K19Rik	1700001K19Rik	TSS5221	chr12:111905898-111920829	-	-	0.207812	0.0567113	0.358912	OK	0.380432	0.162331	0.598533	OK	0.0707623	0.00172752	0.139797	OK
1700001K23Rik	-	-	1700001K23Rik	1700001K23Rik	TSS19749	chr19:53323225-53329695	-	-	0.043195	0	0.122918	OK	0	0	0	OK	0	0	0	OK
1700001L05Rik	-	-	1700001L05Rik	1700001L05Rik	TSS10699	chr15:83184276-83197727	-	-	0.596007	0.427576	0.764438	OK	0.575533	0.425852	0.725215	OK	2.09992	1.7431	2.45674	OK
1700001L19Rik	-	-	1700001L19Rik	1700001L19Rik	TSS5829	chr13:68736315-68753108	-	-	0.0453996	0.00147212	0.0893271	OK	0.0411167	0.00443256	0.0778008	OK	0.155512	0.0644229	0.2466	OK
1700001O22Rik	-	-	1700001O22Rik	1700001O22Rik	TSS14674,TSS20763	chr2:30651088-30659177	-	-	0.0230744	0	0.0566031	OK	0.144655	0.0298542	0.259457	OK	0	0	0	OK
1700001P01Rik	-	-	1700001P01Rik	1700001P01Rik	TSS10765	chr11:97632794-97637232	-	-	0.035681	0	0.0964828	OK	0.0120789	0	0.0452638	OK	0.504558	0.174268	0.834848	OK
1700003E16Rik	-	-	1700003E16Rik	1700003E16Rik	TSS18817	chr6:83106397-83112969	-	-	0.586243	0.348296	0.82419	OK	0.70956	0.448046	0.971074	OK	0.808584	0.520772	1.0964	OK
1700003F12Rik	-	-	1700003F12Rik	1700003F12Rik	TSS24150	chr2:154370140-154384589	-	-	0.0308326	0	0.116459	OK	0.0238543	0	0.101818	OK	0.495737	0.00853707	0.982937	OK
1700003G18Rik	-	-	1700003G18Rik	1700003G18Rik	TSS6493	chr7:123225275-123236663	-	-	0.0543094	0	0.134901	OK	0	0	0	OK	0	0	0	OK
1700003H04Rik	-	-	1700003H04Rik	1700003H04Rik	TSS3189	chr3:124268808-124284009	-	-	0	0	0	OK	0	0	0	OK	0	0	0	OK
1700003M02Rik	-	-	1700003M02Rik	1700003M02Rik	TSS7585	chr4:34658580-34677455	-	-	0.205883	0.0829103	0.328856	OK	0.14487	0.0566899	0.233051	OK	0	0	0	OK
1700006A11Rik	-	-	1700006A11Rik	1700006A11Rik	TSS16805	chr3:124104072-124128946	-	-	0	0	0	OK	0	0	0	OK	0	0	0	OK
1700006E09Rik	-	-	1700006E09Rik	1700006E09Rik	TSS22387	chr11:101848369-101853578	-	-	0	0	0	OK	0	0	0	OK	0	0	0	OK
1700007B14Rik	-	-	1700007B14Rik	1700007B14Rik	TSS554	chr8:77972592-78508406	-	-	0.00945471	0	0.0314373	OK	0	0	0	OK	0	0	0	OK
1700007E06Rik	-	-	1700007E06Rik	1700007E06Rik	TSS1522,TSS20403	chr15:89220604-89240934	-	-	0	0	0	OK	0	0	0	OK	0	0	0	OK
1700007G11Rik	-	-	1700007G11Rik	1700007G11Rik	TSS24100	chr5:98758322-99231038	-	-	0	0	0	OK	0.0346954	0	0.108765	OK	0	0	0	OK
1700007I08Rik	-	-	1700007I08Rik	1700007I08Rik	TSS23285	chr2:154370140-154384589	-	-	0.0306181	0	0.083188	OK	0.0234508	0	0.0668077	OK	0.223043	0.0296108	0.416475	OK
1700007K09Rik	-	-	1700007K09Rik	1700007K09Rik	TSS23926	chr7:138469444-138473013	-	-	0.0357538	0	0.0934848	OK	0.0196866	0	0.0579311	OK	0	0	0	OK
1700007K13Rik	-	-	1700007K13Rik	1700007K13Rik	TSS22821	chr2:28317520-28321844	-	-	1.22714	0.677838	1.77645	OK	1.01091	0.560355	1.46146	OK	1.14585	0.651779	1.63993	OK
1700008A04Rik	-	-	1700008A04Rik	1700008A04Rik	TSS22591	chr11:32720375-32724594	-	-	0	0	0	OK	0	0	0	OK	0	0	0	OK
1700008F21Rik	-	-	1700008F21Rik	1700008F21Rik	TSS8197	chr8:131591033-131707632	-	-	0.00837304	0	0.0342805	OK	0	0	0	OK	0	0	0	OK
1700008I05Rik	-	-	1700008I05Rik	1700008I05Rik	TSS5343	chrX:132189236-132228329	-	-	0	0	0	OK	0	0	0	OK	0	0	0	OK
1700008J07Rik	-	-	1700008J07Rik	1700008J07Rik	TSS10298	chr7:134653951-134656383	-	-	2.92196	2.26839	3.57552	OK	2.61017	2.0463	3.17404	OK	3.02135	2.38676	3.65595	OK
1700008O03Rik	-	-	1700008O03Rik	1700008O03Rik	TSS21349	chr7:51615414-51630400	-	-	0.0748891	0	0.153551	OK	0.0243668	0	0.063017	OK	0.0940382	0.00229576	0.185781	OK
1700008P02Rik	-	-	1700008P02Rik	1700008P02Rik	TSS8890	chr3:6615412-6620443	-	-	0	0	0	OK	0	0	0	OK	0	0	0	OK
1700008P20Rik	-	-	1700008P20Rik	1700008P20Rik	TSS23418	chr7:25118098-25118984	-	-	0.0814688	0	0.168288	OK	0.0997178	0.00619162	0.193244	OK	0	0	0	OK
1700009J07Rik	-	-	1700009J07Rik	1700009J07Rik	TSS6915	chr10:77356164-77358856	-	-	0.0102556	0	0.0359872	OK	0	0	0	OK	0	0	0	OK
1700009N14Rik	-	-	1700009N14Rik	1700009N14Rik	TSS16517	chr4:39397325-39398811	-	-	0	0	0	OK	0	0	0	OK	0	0	0	OK
1700009P17Rik	-	-	1700009P17Rik	1700009P17Rik	TSS19530	chr1:173051791-173057098	-	-	9.16488	7.29874	11.031	OK	5.78694	4.51659	7.05729	OK	2.93094	2.1186	3.74327	OK
1700010B08Rik	-	-	1700010B08Rik	1700010B08Rik	TSS7220	chr2:173544915-173547587	-	-	0.107769	0.00382425	0.211714	OK	0.0427318	0	0.0932298	OK	0.623266	0.31336	0.933173	OK
1700010D01Rik	-	-	1700010D01Rik	1700010D01Rik	TSS2987	chrX:92907016-93123309	-	-	0	0	0	OK	0.0140085	0	0.119743	OK	0	0	0	OK
1700010I14Rik	-	-	1700010I14Rik	1700010I14Rik	TSS5532	chr17:9181197-9201184	-	-	0.800116	0.498277	1.10195	OK	0.509403	0.304938	0.713867	OK	0.136993	0.054081	0.219905	OK
1700010M22Rik	-	-	1700010M22Rik	1700010M22Rik	TSS928	chr2:144649401-144650151	-	-	0	0	0	OK	0	0	0	OK	0	0	0	OK
1700011A15Rik	-	-	1700011A15Rik	1700011A15Rik	TSS8440	chr15:101278175-101284340	-	-	0.0104066	0	0.0365171	OK	0.0494433	0	0.107873	OK	0.188146	0.0412951	0.334998	OK
1700011E24Rik	-	-	1700011E24Rik	1700011E24Rik	TSS15069	chr17:87788910-87827081	-	-	0	0	0	OK	0	0	0	OK	0	0	0	OK
1700011F03Rik	-	-	1700011F03Rik	1700011F03Rik	TSS19111	chr6:70863082-70868916	-	-	0	0	0	OK	0	0	0	OK	0	0	0	OK
1700011F14Rik	-	-	1700011F14Rik	1700011F14Rik	TSS4460	chr19:58586491-58627575	-	-	0	0	0	OK	0	0	0	OK	0	0	0	OK
1700011H14Rik	-	-	1700011H14Rik	1700011H14Rik	TSS1325	chr14:49846033-49865103	-	-	0.436105	0.19926	0.67295	OK	0.805648	0.483923	1.12737	OK	0	0	0	OK
1700011I03Rik	-	-	1700011I03Rik	1700011I03Rik	TSS10658	chr18:57693479-57890719	-	-	0	0	0	OK	0	0	0	OK	0	0	0	OK
1700011L22Rik	-	-	1700011L22Rik	1700011L22Rik	TSS8776	chr8:81734328-81772482	-	-	0.00406224	0	0.0195462	OK	0	0	0	OK	0	0	0	OK
1700012A03Rik	-	-	1700012A03Rik	1700012A03Rik	TSS6545	chr6:32000287-32008915	-	-	0	0	0	OK	0	0	0	OK	0	0	0	OK
1700012A16Rik	-	-	1700012A16Rik	1700012A16Rik	TSS11302	chr1:155272338-155299704	-	-	0.0255484	0	0.0536857	OK	0.0222815	0	0.0461703	OK	0	0	0	OK
1700012B07Rik	-	-	1700012B07Rik	1700012B07Rik	TSS4719	chr11:109649604-109689360	-	-	0.0486474	0	0.109477	OK	0.0194826	0	0.0541432	OK	0.0362401	0	0.0876694	OK
1700012B09Rik	-	-	1700012B09Rik	1700012B09Rik	TSS16258	chr9:14562637-14575474	-	-	0	0	0	OK	0	0	0	OK	0	0	0	OK
1700012B15Rik	-	-	1700012B15Rik	1700012B15Rik	TSS22563	chr12:3235790-3309969	-	-	3.20615	0	6.63622	OK	2.58671	0	5.40449	OK	4.16328	1.06716	7.2594	OK
1700012D14Rik	-	-	1700012D14Rik	1700012D14Rik	TSS16683	chr7:118261186-118266189	-	-	0.241047	0.0388776	0.443217	OK	0.34484	0.098024	0.591656	OK	0	0	0	OK
1700012L04Rik	-	-	1700012L04Rik	1700012L04Rik	TSS23796	chrX:8849909-8890371	-	-	0.185788	0	0.977066	OK	0.10841	0	0.707911	OK	0.554083	0	1.65952	OK
1700012P22Rik	-	-	1700012P22Rik	1700012P22Rik	TSS10714	chr4:144008093-144028675	-	-	0	0	0	OK	0	0	0	OK	0	0	0	OK
1700013B16Rik	-	-	1700013B16Rik	1700013B16Rik	TSS3349	chr13:59801443-59807558	-	-	0	0	0	OK	0.000581791	0	0.00284169	OK	0	0	0	OK
1700013D24Rik	-	-	1700013D24Rik	1700013D24Rik	TSS22498	chr6:124297611-124307104	-	-	0	0	0	OK	0	0	0	OK	0	0	0	OK
1700013F07Rik	-	-	1700013F07Rik	1700013F07Rik	TSS19058	chr3:108340501-108347615	-	-	0.46991	0.15526	0.78456	OK	0.416834	0.1479	0.685768	OK	0.0649062	0	0.144857	OK
1700013G24Rik	-	-	1700013G24Rik	1700013G24Rik	TSS7488	chr4:137009210-137011376	-	-	0	0	0	OK	0	0	0	OK	0	0	0	OK
1700013H16Rik	-	-	1700013H16Rik	1700013H16Rik	TSS2283	chrX:51046077-51061008	-	-	0	0	0	OK	0.00419079	0	0.0157043	OK	0	0	0	OK
1700013N18Rik	-	-	1700013N18Rik	1700013N18Rik	TSS23109	chr5:108173813-108304126	-	-	0.0235154	0	0.144463	OK	0.0998316	0	0.33332	OK	0.0185711	0	0.10397	OK
1700014N06Rik	-	-	1700014N06Rik	1700014N06Rik	TSS8360	chrX:133461863-133462912	-	-	0	0	0	OK	0	0	0	OK	0	0	0	OK
1700015E13Rik	-	-	1700015E13Rik	1700015E13Rik	TSS8420	chr1:172238991-172242256	-	-	0.0119402	0	0.0441223	OK	0.0827353	0	0.168026	OK	0	0	0	OK
1700015G11Rik	-	-	1700015G11Rik	1700015G11Rik	TSS14401	chr7:59267049-59271086	-	-	0.179082	0	0.392469	OK	0.0875058	0	0.20771	OK	0	0	0	OK
1700016C15Rik	-	-	1700016C15Rik	1700016C15Rik	TSS14482	chr1:179659944-179683436	-	-	0.00561204	0	0.0270034	OK	0.0328311	0	0.0779302	OK	0.60656	0.278971	0.934149	OK
1700016D06Rik	-	-	1700016D06Rik	1700016D06Rik	TSS53	chr8:11654923-11678750	-	-	0	0	0	OK	0.00417202	0	0.015634	OK	0	0	0	OK
1700016H13Rik	-	-	1700016H13Rik	1700016H13Rik	TSS12198,TSS3222	chr5:104077605-104084751	-	-	0.0105558	0	0.059865	OK	0	0	0	OK	0	0	0	OK
1700016K19Rik	-	-	1700016K19Rik	1700016K19Rik	TSS11180	chr11:75813413-75817071	-	-	0.34824	0.128719	0.567762	OK	0.19993	0.0584005	0.34146	OK	0.523225	0.240643	0.805806	OK
1700016M24Rik	-	-	1700016M24Rik	1700016M24Rik	TSS3161	chr15:74436457-74466748	-	-	0	0	0	OK	0	0	0	OK	0	0	0	OK
1700017B05Rik	-	-	1700017B05Rik	1700017B05Rik	TSS20201	chr9:57100128-57110406	-	-	2.26927	1.83995	2.6986	OK	2.51387	2.07177	2.95597	OK	4.08088	3.42911	4.73265	OK
1700017D01Rik	-	-	1700017D01Rik	1700017D01Rik	TSS23887	chr19:11171305-11205368	-	-	0	0	0	OK	0	0	0	OK	0	0	0	OK
1700017N19Rik	-	-	1700017N19Rik	1700017N19Rik	TSS7618	chr10:100055019-100081025	-	-	0.00288227	0	0.0124888	OK	0	0	0	OK	0	0	0	OK
1700018A04Rik	-	-	1700018A04Rik	1700018A04Rik	TSS9468	chr13:31657360-31674382	-	-	0	0	0	OK	0	0	0	OK	0	0	0	OK
1700018A14Rik	-	-	1700018A14Rik	1700018A14Rik	TSS11862	chr18:46324953-46372261	-	-	0	0	0	OK	0	0	0	OK	0	0	0	OK
1700018B08Rik	-	-	1700018B08Rik	1700018B08Rik	TSS3223	chr8:124054683-124065854	-	-	0	0	0	OK	0	0	0	OK	0	0	0	OK
1700018B24Rik	-	-	1700018B24Rik	1700018B24Rik	TSS9696	chr3:48409652-48413022	-	-	0	0	0	OK	0	0	0	OK	0	0	0	OK
1700018C11Rik	-	-	1700018C11Rik	1700018C11Rik	TSS19186	chr4:63268124-63283463	-	-	0	0	0	OK	0	0	0	OK	0	0	0	OK
1700018F24Rik	-	-	1700018F24Rik	1700018F24Rik	TSS11085	chr5:145803858-145806547	-	-	0	0	0	OK	0	0	0	OK	0	0	0	OK
1700018L02Rik	-	-	1700018L02Rik	1700018L02Rik	TSS20825	chr19:29095321-29123219	-	-	2.22737	0.555486	3.89925	OK	2.14428	0.388827	3.89972	OK	0	0	0	OK
1700018L24Rik	-	-	1700018L24Rik	1700018L24Rik	TSS16004	chr8:11840520-11855761	-	-	0.0186932	0	0.0543037	OK	0.0152843	0	0.0449766	OK	0	0	0	OK
1700019A02Rik	-	-	1700019A02Rik	1700019A02Rik	TSS22264	chr1:53215420-53244461	-	-	0.0418833	0	0.107257	OK	0.0487283	0	0.110052	OK	0	0	0	OK
1700019B03Rik	-	-	1700019B03Rik	1700019B03Rik	TSS213	chr8:3470861-3487178	-	-	0.0182966	0	0.0436284	OK	0.0275852	0	0.0571603	OK	0	0	0	OK
1700019D03Rik	-	-	1700019D03Rik	1700019D03Rik	TSS21162	chr1:52981970-53009684	-	-	15.1949	12.2606	18.1292	OK	11.5964	9.26271	13.9302	OK	0.902649	0.482089	1.32321	OK
1700019E19Rik	-	-	1700019E19Rik	1700019E19Rik	TSS11486	chr12:87423510-87503409	-	-	2.62337	1.69913	3.5476	OK	2.59265	1.71851	3.46679	OK	4.4425	3.17686	5.70814	OK
1700019G17Rik	-	-	1700019G17Rik	1700019G17Rik	TSS13157,TSS7982	chr6:85849043-85854932	-	-	1.21107	0.779142	1.64301	OK	1.30488	0.901834	1.70792	OK	1.41897	0.98041	1.85753	OK
1700019L03Rik	-	-	1700019L03Rik	1700019L03Rik	TSS15147	chr2:32631340-32639925	-	-	0.209082	0.04211	0.376054	OK	0.154234	0.0275893	0.280878	OK	0.248773	0.0437066	0.453839	OK
1700019M22Rik	-	-	1700019M22Rik	1700019M22Rik	TSS12146	chr12:97284828-97285432	-	-	0	0	0	OK	0	0	0	OK	0	0	0	OK
1700019N12Rik	-	-	1700019N12Rik	1700019N12Rik	TSS22600	chr19:6996915-6999870	-	-	0	0	0	OK	0.0558597	0	0.118499	OK	0	0	0	OK
1700019N19Rik	-	-	1700019N19Rik	1700019N19Rik	TSS14952	chr19:58860292-58868904	-	-	0.0323994	0	0.0794196	OK	0.00643814	0	0.0241259	OK	0.0339019	0	0.075662	OK
1700019O17Rik	-	-	1700019O17Rik	1700019O17Rik	TSS5729	chr1:88322903-88324624	-	-	0.00282498	0	0.0122405	OK	0	0	0	OK	0	0	0	OK
1700020A23Rik	-	-	1700020A23Rik	1700020A23Rik	TSS21806,TSS9882	chr2:130230994-130231810	-	-	0.0309113	0	0.117975	OK	0.0608419	0	0.155587	OK	0	0	0	OK
1700020C07Rik	-	-	1700020C07Rik	1700020C07Rik	TSS17257	chr2:164652881-164654034	-	-	0.0212206	0	0.0618491	OK	0.0188491	0	0.0554666	OK	0.0507983	0	0.113371	OK
1700020D05Rik	-	-	1700020D05Rik	1700020D05Rik	TSS1659	chr19:5495277-5510489	-	-	0.793435	0.143424	1.44345	OK	1.41534	0.652774	2.17791	OK	0.71285	0.129394	1.29631	OK
1700020I14Rik	-	-	1700020I14Rik	1700020I14Rik	TSS4263	chr2:119420031-119426480	-	-	4.87825	3.77043	5.98607	OK	7.14232	5.76133	8.52332	OK	4.62819	3.50594	5.75044	OK
1700020L24Rik	-	-	1700020L24Rik	1700020L24Rik	TSS7979	chr11:83251195-83254734	-	-	0.0888047	0.00188368	0.175726	OK	0.218557	0.0603285	0.376786	OK	0.283321	0.0886889	0.477952	OK
1700020N01Rik	-	-	1700020N01Rik	1700020N01Rik	TSS8148	chr10:21312950-21342181	-	-	0	0	0	OK	0	0	0	OK	0	0	0	OK
1700020N18Rik	-	-	1700020N18Rik	1700020N18Rik	TSS4452	chr1:93301456-93302606	-	-	0.0297796	0	0.0891473	OK	0.11062	0	0.22922	OK	0	0	0	OK
1700020O03Rik	-	-	1700020O03Rik	1700020O03Rik	TSS3704	chr12:87582827-87632318	-	-	3.94606	3.25628	4.63584	OK	3.75592	3.1222	4.38965	OK	3.94656	3.29052	4.60259	OK
1700021C14Rik	-	-	1700021C14Rik	1700021C14Rik	TSS16534	chr3:88086681-88100760	-	-	1.16366	0.515167	1.81215	OK	0.660671	0.247221	1.07412	OK	0.358339	0.0786496	0.638029	OK
1700021F05Rik	-	-	1700021F05Rik	1700021F05Rik	TSS23727	chr10:43244926-43260800	-	-	4.37359	3.11229	5.63489	OK	3.94645	2.86992	5.02298	OK	10.402	8.32188	12.4821	OK
1700021F07Rik	-	-	1700021F07Rik	1700021F07Rik	TSS6913	chr2:173348092-173354003	-	-	0	0	0	OK	0	0	0	OK	0	0	0	OK
1700021K19Rik	-	-	1700021K19Rik	1700021K19Rik	TSS14489	chr16:32821821-32868425	-	-	14.4411	12.0808	16.8014	OK	12.6083	10.5398	14.6768	OK	10.7602	9.02046	12.5	OK
1700022A21Rik	-	-	1700022A21Rik	1700022A21Rik	TSS9685	chr5:24151270-24154678	-	-	0	0	0	OK	0	0	0	OK	0	0	0	OK
1700022I11Rik	-	-	1700022I11Rik	1700022I11Rik	TSS7512	chr4:42982817-42987197	-	-	0.0170523	0	0.0351029	OK	0.0114191	0	0.0231908	OK	0.0129358	0.000315802	0.0255557	OK
1700022P22Rik	-	-	1700022P22Rik	1700022P22Rik	TSS7221	chr1:192860700-192866820	-	-	0.183322	0	0.378945	OK	0.115248	0	0.251441	OK	0	0	0	OK
1700023A16Rik	-	-	1700023A16Rik	1700023A16Rik	TSS11690	chr6:146798631-146819926	-	-	0	0	0	OK	0	0	0	OK	0	0	0	OK
1700023E05Rik	-	-	1700023E05Rik	1700023E05Rik	TSS6746	chr5:77445047-77490547	-	-	0.00926425	0	0.0264434	OK	0	0	0	OK	0	0	0	OK
1700023I07Rik	-	-	1700023I07Rik	1700023I07Rik	TSS10394	chrX:22038721-22040669	-	-	0	0	0	OK	0	0	0	OK	0	0	0	OK
1700024G13Rik	-	-	1700024G13Rik	1700024G13Rik	TSS21287	chr14:33189687-33201559	-	-	0	0	0	OK	0	0	0	OK	0	0	0	OK
1700024P04Rik	-	-	1700024P04Rik	1700024P04Rik	TSS14535	chr13:99754044-99754520	-	-	0	0	0	OK	0	0	0	OK	0	0	0	OK
1700024P16Rik	-	-	1700024P16Rik	1700024P16Rik	TSS13591	chr4:104586060-104689468	-	-	0.014246	0	0.0318379	OK	0.0477598	0.0146509	0.0808687	OK	0	0	0	OK
1700025C18Rik	-	-	1700025C18Rik	1700025C18Rik	TSS15518	chr2:164904192-164916250	-	-	0.042172	0	0.103455	OK	0.144278	0.0183835	0.270172	OK	0	0	0	OK
1700025E21Rik	-	-	1700025E21Rik	1700025E21Rik	TSS14203,TSS24013	chr6:30459848-30470253	-	-	0.0108512	0	0.0415153	OK	0.0145759	0	0.0443296	OK	0.0796863	0.00916563	0.150207	OK
1700025F22Rik	-	-	1700025F22Rik	1700025F22Rik	TSS13158	chr19:11214172-11239810	-	-	0	0	0	OK	0	0	0	OK	0	0	0	OK
1700025G04Rik	-	-	1700025G04Rik	1700025G04Rik	TSS21135	chr1:153731653-153937450	-	-	0.284124	0.196796	0.371452	OK	0.571124	0.44659	0.695659	OK	1.17405	0.969197	1.3789	OK
1700025K23Rik	-	-	1700025K23Rik	1700025K23Rik	TSS14011	chr10:38838613-38853701	-	-	3.09775	2.00987	4.18563	OK	2.3144	1.47966	3.14914	OK	2.03574	1.26465	2.80682	OK
1700026D08Rik	-	-	1700026D08Rik	1700026D08Rik	TSS17033	chr7:90924126-90943349	-	-	0	0	0	OK	0.0088485	0	0.0260381	OK	0	0	0	OK
1700026D11Rik	-	-	1700026D11Rik	1700026D11Rik	TSS6353	chr2:132316463-132349793	-	-	0	0	0	OK	0	0	0	OK	0	0	0	OK
1700026J04Rik	-	-	1700026J04Rik	1700026J04Rik	TSS16999	chr13:35001832-35011861	-	-	0.116167	0.0426388	0.189695	OK	0.17726	0.0877513	0.266769	OK	0	0	0	OK
1700026L06Rik	-	-	1700026L06Rik	1700026L06Rik	TSS7921	chr2:28547599-28555171	-	-	0.0610291	0	0.138229	OK	0.139337	0.0150212	0.263654	OK	0	0	0	OK
1700027A23Rik	-	-	1700027A23Rik	1700027A23Rik	TSS23436	chr3:105799874-105804415	-	-	0.0722484	0	0.147409	OK	0.0190776	0	0.049338	OK	0	0	0	OK
1700027D21Rik	-	-	1700027D21Rik	1700027D21Rik	TSS21193	chr10:76025016-76032945	-	-	0.0270135	0	0.0611572	OK	0.0422071	0	0.0857177	OK	0.0485744	0.00118585	0.095963	OK
1700028B04Rik	-	-	1700028B04Rik	1700028B04Rik	TSS15420	chr7:29281959-29282511	-	-	0.300581	0.0589842	0.542178	OK	0.0950187	0	0.20157	OK	0.453569	0.141982	0.765155	OK
1700028J19Rik	-	-	1700028J19Rik	1700028J19Rik	TSS19462	chr7:51485299-51491492	-	-	0.301012	0.118592	0.483432	OK	0.350167	0.156482	0.543851	OK	0.302756	0.130582	0.474929	OK
1700028K03Rik	-	-	1700028K03Rik	1700028K03Rik	TSS6419	chr5:107963729-108090857	-	-	0.340578	0	0.793638	OK	0.507018	0.204411	0.809625	OK	0.259244	0.0906799	0.427809	OK
1700028M03Rik	-	-	1700028M03Rik	1700028M03Rik	TSS23199	chr3:83359288-83378040	-	-	0	0	0	OK	0	0	0	OK	0	0	0	OK
1700028P14Rik	-	-	1700028P14Rik	1700028P14Rik	TSS18519	chr19:23633249-23727302	-	-	0	0	0	OK	0	0	0	OK	0	0	0	OK
1700029F09Rik	-	-	1700029F09Rik	1700029F09Rik	TSS12661	chr1:44143461-44159233	-	-	7.23292	5.71054	8.75529	OK	4.22983	3.27242	5.18724	OK	10.5493	8.71458	12.3841	OK
1700029F12Rik	-	-	1700029F12Rik	1700029F12Rik	TSS5709	chr13:97791818-97804317	-	-	0	0	0	OK	0	0	0	OK	0	0	0	OK
1700029G01Rik	-	-	1700029G01Rik	1700029G01Rik	TSS16605,TSS9686	chr4:125827845-125840585	-	-	4.08636	3.09458	5.07813	OK	3.2456	2.50968	3.98153	OK	1.72078	1.25218	2.18939	OK
1700029H14Rik	-	-	1700029H14Rik	1700029H14Rik	TSS1744	chr8:13550732-13562448	-	-	0	0	0	OK	0	0	0	OK	0	0	0	OK
1700029I01Rik	-	-	1700029I01Rik	1700029I01Rik	TSS9262	chr4:146237770-146887529	-	-	2.1663	1.62822	2.70438	OK	1.70534	1.31029	2.10039	OK	0.00518141	0	0.0125345	OK
1700029I15Rik	-	-	1700029I15Rik	1700029I15Rik	TSS18033	chr2:92223074-92223760	-	-	0.457743	0.0507008	0.864785	OK	0.373503	0.0321819	0.714825	OK	0.189436	0	0.422781	OK
1700029J07Rik	-	-	1700029J07Rik	1700029J07Rik	TSS10681	chr8:47038959-47060606	-	-	2.90794	2.28299	3.53288	OK	2.85162	2.298	3.40523	OK	0.0416198	0.00913488	0.0741048	OK
1700029J11Rik	-	-	1700029J11Rik	1700029J11Rik	TSS20209	chr2:172298053-172299816	-	-	0.0795064	0	0.173222	OK	0.085509	0	0.177186	OK	0	0	0	OK
1700029M20Rik	-	-	1700029M20Rik	1700029M20Rik	TSS1465	chr4:135182569-135186113	-	-	0	0	0	OK	0	0	0	OK	0	0	0	OK
1700029P11Rik	-	-	1700029P11Rik	1700029P11Rik	TSS3653	chr15:81810974-81811993	-	-	0.0141452	0	0.0424999	OK	0.0118835	0	0.034969	OK	0	0	0	OK
1700030C10Rik	-	-	1700030C10Rik	1700030C10Rik	TSS14632	chr12:20810252-20821640	-	-	4.44003	3.45853	5.42154	OK	4.92369	3.93239	5.915	OK	5.31059	4.26737	6.35381	OK
1700030F18Rik	-	-	1700030F18Rik	1700030F18Rik	TSS2616	chr15:99748778-99762089	-	-	0.00713318	0	0.0343226	OK	0	0	0	OK	0	0	0	OK
1700030J22Rik	-	-	1700030J22Rik	1700030J22Rik	TSS12306	chr8:119493498-119502843	-	-	0.848149	0.578795	1.1175	OK	0.580035	0.386439	0.773631	OK	0.293745	0.17357	0.41392	OK
1700030K09Rik	-	-	1700030K09Rik	1700030K09Rik	TSS12327	chr8:74967778-74999132	-	-	3.37591	1.53142	5.2204	OK	2.72488	1.28474	4.16502	OK	2.72396	0	5.45606	OK
1700031F05Rik	-	-	1700031F05Rik	1700031F05Rik	TSS8087	chrX:100054525-100061692	-	-	0	0	0	OK	0.00414536	0	0.0155341	OK	0	0	0	OK
1700031M16Rik	-	-	1700031M16Rik	1700031M16Rik	TSS21256	chr15:98228875-98246566	-	-	0.021687	0	0.059998	OK	0	0	0	OK	0	0	0	OK
1700034E13Rik	-	-	1700034E13Rik	1700034E13Rik	TSS7297	chr18:52805873-52823385	-	-	0	0	0	OK	0	0	0	OK	0	0	0	OK
1700034F02Rik	-	-	1700034F02Rik	1700034F02Rik	TSS6716	chr11:29445841-29478352	-	-	0.0889413	0	0.29177	OK	0.0947251	0	0.192398	OK	0.0373469	0	0.1069	OK
1700034H14Rik	-	-	1700034H14Rik	1700034H14Rik	TSS18077	chr18:85104416-85150784	-	-	2.81933	1.99841	3.64025	OK	2.52795	1.82724	3.22867	OK	3.04341	2.23535	3.85146	OK
1700034H15Rik	-	-	1700034H15Rik	1700034H15Rik	TSS8466	chr1:193717950-193737126	-	-	0.283757	0.063612	0.503902	OK	0.390098	0.153165	0.627031	OK	0.0958366	0.00101619	0.190657	OK
1700034I23Rik	-	-	1700034I23Rik	1700034I23Rik	TSS19019	chr3:40698198-40740229	-	-	0.22707	0.0345532	0.419587	OK	0.411115	0.18189	0.64034	OK	0.109656	0.00341457	0.215897	OK
1700034J05Rik	-	-	1700034J05Rik	1700034J05Rik	TSS9703	chr6:146837015-146980545	-	-	0.022305	0	0.145372	OK	0.101722	0	0.355911	OK	0.0129893	0	0.0959384	OK
1700034O15Rik	-	-	1700034O15Rik	1700034O15Rik	TSS22522	chr6:41634429-41635716	-	-	0	0	0	OK	0	0	0	OK	0	0	0	OK
1700037C18Rik	-	-	1700037C18Rik	1700037C18Rik	TSS5717	chr16:3905797-3908689	-	-	3.03456	2.13118	3.93795	OK	2.49592	1.72967	3.26218	OK	4.13429	3.07205	5.19652	OK
1700037H04Rik	-	-	1700037H04Rik	1700037H04Rik	TSS16879	chr2:130972060-130985756	-	-	5.03438	3.83755	6.2312	OK	5.01378	3.86302	6.16453	OK	11.6162	9.61335	13.6191	OK
1700039E15Rik	-	-	1700039E15Rik	1700039E15Rik	TSS4188	chr7:52538242-52544363	-	-	0	0	0	OK	0.00323887	0	0.0121371	OK	0	0	0	OK
1700040I03Rik	-	-	1700040I03Rik	1700040I03Rik	TSS4414,TSS8834	chr6:85396778-85418471	-	-	3.51105	0.457817	6.56428	OK	2.57164	0.390471	4.7528	OK	10.3853	0	30.358	OK
1700040L02Rik	-	-	1700040L02Rik	1700040L02Rik	TSS3041	chr10:67893703-68004623	-	-	5.61697	4.32586	6.90809	OK	3.36549	2.52175	4.20923	OK	0	0	0	OK
1700041C23Rik	-	-	1700041C23Rik	1700041C23Rik	TSS23666	chr9:57023081-57033915	-	-	0	0	0	OK	0	0	0	OK	0	0	0	OK
1700042B14Rik	-	-	1700042B14Rik	1700042B14Rik	TSS17694	chrX:151559523-151582392	-	-	0	0	0	OK	0.00557156	0	0.0208785	OK	0	0	0	OK
1700042G07Rik	-	-	1700042G07Rik	1700042G07Rik	TSS16153	chr4:115845976-115846902	-	-	0	0	0	OK	0	0	0	OK	0	0	0	OK
1700044K03Rik	-	-	1700044K03Rik	1700044K03Rik	TSS1902	chr18:49682942-49684094	-	-	0	0	0	OK	0	0	0	OK	0	0	0	OK
1700045I19Rik	-	-	1700045I19Rik	1700045I19Rik	TSS13779	chrX:160198071-160199261	-	-	9.02215	7.19796	10.8463	OK	2.8703	2.06455	3.67606	OK	0.0286173	0	0.0638677	OK
1700047I17Rik2	-	-	1700047I17Rik2	1700047I17Rik2	TSS5598,TSS6041	chr12:56225514-56243069	-	-	6.34611	1.39149	11.3007	OK	5.26697	2.05195	8.48199	OK	13.9446	7.84979	20.0394	OK
1700047M11Rik	-	-	1700047M11Rik	1700047M11Rik	TSS3144	chr1:184230964-184233420	-	-	0	0	0	OK	0.0508622	0	0.114871	OK	0	0	0	OK
1700048O20Rik	-	-	1700048O20Rik	1700048O20Rik	TSS4713	chr9:121846392-121856134	-	-	0.00666019	0	0.0205349	OK	0.135665	0.0525327	0.218798	OK	5.55494	4.53423	6.57566	OK
1700049E15Rik	-	-	1700049E15Rik	1700049E15Rik	TSS21323	chr6:147638762-147650896	-	-	0.0130862	0	0.0422865	OK	0.0767557	0.00269183	0.15082	OK	0.0356506	0	0.0795647	OK
1700049G17Rik	-	-	1700049G17Rik	1700049G17Rik	TSS4914	chr7:28692410-28714449	-	-	1.7648	1.40526	2.12434	OK	1.82747	1.49574	2.15921	OK	0.33422	0.226054	0.442386	OK
1700049L16Rik	-	-	1700049L16Rik	1700049L16Rik	TSS22089	chr10:71442632-71443438	-	-	0.0755521	0	0.164112	OK	0.00720977	0	0.0270175	OK	0.0788995	0.00192618	0.155873	OK
1700052I22Rik	-	-	1700052I22Rik	1700052I22Rik	TSS70	chr12:82024418-82025434	-	-	0	0	0	OK	0	0	0	OK	0	0	0	OK
1700052K11Rik	-	-	1700052K11Rik	1700052K11Rik	TSS15825	chr11:105040334-105042747	-	-	2.38766	1.80992	2.96539	OK	1.99802	1.52202	2.47402	OK	2.77621	2.18425	3.36817	OK
1700052N19Rik	-	-	1700052N19Rik	1700052N19Rik	TSS10642	chr10:5891400-5913936	-	-	3.71922	2.93009	4.50835	OK	2.74303	2.15118	3.33489	OK	7.92055	6.6291	9.21201	OK
1700054K19Rik	-	-	1700054K19Rik	1700054K19Rik	TSS547	chr6:112160701-112162512	-	-	0	0	0	OK	0	0	0	OK	0	0	0	OK
1700054N08Rik	-	-	1700054N08Rik	1700054N08Rik	TSS15055	chr8:126364743-126384109	-	-	0.958369	0.648611	1.26813	OK	0.972948	0.673783	1.27211	OK	5.54771	4.57973	6.5157	OK
1700054O13Rik	-	-	1700054O13Rik	1700054O13Rik	TSS12682	chrX:9424072-9424626	-	-	0.0823343	0	0.184872	OK	0.121954	0.000536448	0.243372	OK	0.13451	0.00328379	0.265735	OK
1700056E22Rik	-	-	1700056E22Rik	1700056E22Rik	TSS5417	chr1:185856910-185857877	-	-	2.57659	1.70761	3.44557	OK	2.21682	1.43151	3.00212	OK	1.5567	0.913539	2.19985	OK
1700057G04Rik	-	-	1700057G04Rik	1700057G04Rik	TSS23442	chr9:92204214-92252714	-	-	0	0	0	OK	0	0	0	OK	0	0	0	OK
1700057K13Rik	-	-	1700057K13Rik	1700057K13Rik	TSS13426	chr1:159029278-159038776	-	-	0.00449598	0	0.0216333	OK	0	0	0	OK	0.0346528	0	0.0773377	OK
1700058C13Rik	-	-	1700058C13Rik	1700058C13Rik	TSS22278	chr2:153956082-153964091	-	-	0	0	0	OK	0	0	0	OK	0	0	0	OK
1700058G18Rik	-	-	1700058G18Rik	1700058G18Rik	TSS9021	chr10:115854923-115910579	-	-	0	0	0	OK	0	0	0	OK	0.160853	0	0.636728	OK
1700060C20Rik	-	-	1700060C20Rik	1700060C20Rik	TSS22414	chr2:158008268-158054958	-	-	0	0	0	OK	0	0	0	OK	0	0	0	OK
1700061G19Rik	-	-	1700061G19Rik	1700061G19Rik	TSS1074	chr17:57015055-57028261	-	-	0.0167269	0	0.0374716	OK	0.0303437	0.00261449	0.0580729	OK	0.6099	0.392809	0.826992	OK
1700061J05Rik	-	-	1700061J05Rik	1700061J05Rik	TSS5753,TSS816	chr15:78208829-78226342	-	-	0	0	0	OK	0.00642089	0	0.0383368	OK	0	0	0	OK
1700065D16Rik	-	-	1700065D16Rik	1700065D16Rik	TSS4895	chr9:95755968-95852063	-	-	0.0195433	0	0.0801297	OK	0.0155762	0	0.0714816	OK	0.0841145	0	0.198726	OK
1700065I17Rik	-	-	1700065I17Rik	1700065I17Rik	TSS12965	chr18:56748001-56754433	-	-	0	0	0	OK	0.012748	0	0.0477709	OK	0	0	0	OK
1700066B19Rik	-	-	1700066B19Rik	1700066B19Rik	TSS1772	chr18:35886642-35890523	-	-	0.085812	0.0268243	0.1448	OK	0.0738504	0.0236476	0.124053	OK	0.220573	0.114589	0.326557	OK
1700066M21Rik	-	-	1700066M21Rik	1700066M21Rik	TSS22516	chr1:57434463-57442266	-	-	2.2398	1.72776	2.75184	OK	1.48915	1.14	1.83829	OK	2.81768	2.28127	3.35408	OK
1700066O22Rik	-	-	1700066O22Rik	1700066O22Rik	TSS1673	chr18:57664075-57693406	-	-	0	0	0	OK	0	0	0	OK	0	0	0	OK
1700067K01Rik	-	-	1700067K01Rik	1700067K01Rik	TSS1839	chr8:86525604-86528669	-	-	0.0927032	0.00937826	0.176028	OK	0.0911909	0.0132513	0.169131	OK	0.0893781	0.0129205	0.165836	OK
1700067P10Rik	-	-	1700067P10Rik	1700067P10Rik	TSS2864	chr17:48226581-48227870	-	-	0	0	0	OK	0	0	0	OK	0	0	0	OK
1700069L16Rik	-	-	1700069L16Rik	1700069L16Rik	TSS3733	chr5:114142432-114174781	-	-	0	0	0	OK	0	0	0	OK	0	0	0	OK
1700071K01Rik	-	-	1700071K01Rik	1700071K01Rik	TSS18124	chr11:80693666-81781898	-	-	0.00502613	0	0.0445062	OK	0.0127412	0	0.076351	OK	0	0	0	OK
1700072E05Rik	-	-	1700072E05Rik	1700072E05Rik	TSS9123	chrX:83289537-83292652	-	-	0	0	0	OK	0	0	0	OK	0	0	0	OK
1700073E17Rik	-	-	1700073E17Rik	1700073E17Rik	TSS20092	chr6:145336144-145340743	-	-	0.00101752	0	0.0043583	OK	0.00111119	0	0.00416401	OK	0	0	0	OK
1700074P13Rik	-	-	1700074P13Rik	1700074P13Rik	TSS9047	chr6:40870458-40890556	-	-	0	0	0	OK	0	0	0	OK	0	0	0	OK
1700080E11Rik	-	-	1700080E11Rik	1700080E11Rik	TSS4334	chr9:105045673-105047412	-	-	0	0	0	OK	0	0	0	OK	0	0	0	OK
1700080O16Rik	-	-	1700080O16Rik	1700080O16Rik	TSS3256	chrX:49321871-49325949	-	-	0	0	0	OK	0	0	0	OK	0	0	0	OK
1700081L11Rik	-	-	1700081L11Rik	1700081L11Rik	TSS21237	chr11:104194542-104303605	-	-	14.8249	12.3708	17.279	OK	13.6363	11.3256	15.9471	OK	14.8092	12.2402	17.3781	OK
1700084C01Rik	-	-	1700084C01Rik	1700084C01Rik	TSS10400	chr1:171859069-171864784	-	-	0.00521757	0	0.0192803	OK	0.0398937	0.00139907	0.0783883	OK	0	0	0	OK
1700084E18Rik	-	-	1700084E18Rik	1700084E18Rik	TSS5291	chr2:30092717-30093151	-	-	0.741087	0.228043	1.25413	OK	0.678206	0.212703	1.14371	OK	0.913167	0.315397	1.51094	OK
1700084J12Rik	-	-	1700084J12Rik	1700084J12Rik	TSS10361	chr15:33012883-33524307	-	-	0.567226	0	2.27486	OK	0.355231	0	1.70711	OK	0.736989	0	1.98524	OK
1700086L19Rik	-	-	1700086L19Rik	1700086L19Rik	TSS3558	chr12:75385262-75396937	-	-	17.2834	13.7973	20.7694	OK	22.4867	18.6694	26.304	OK	1.30221	0.757781	1.84665	OK
1700086O06Rik	-	-	1700086O06Rik	1700086O06Rik	TSS20790,TSS21571	chr18:38398058-38422283	-	-	1.68148	0.0431282	3.31982	OK	1.67561	0.403742	2.94747	OK	3.30534	0.905068	5.70561	OK
1700088E04Rik	-	-	1700088E04Rik	1700088E04Rik	TSS2333	chr15:78939412-78971681	-	-	3.58923	2.07725	5.10121	OK	2.62946	1.25433	4.00459	OK	3.90268	2.60639	5.19897	OK
1700090G07Rik	-	-	1700090G07Rik	1700090G07Rik	TSS6196	chr17:87316687-87321707	-	-	0.00665075	0	0.0284868	OK	0	0	0	OK	0	0	0	OK
1700092M07Rik	-	-	1700092M07Rik	1700092M07Rik	TSS6425	chr19:8815207-8815715	-	-	0.242109	0	0.496146	OK	0.263886	0.0092545	0.518517	OK	0	0	0	OK
1700093K21Rik	-	-	1700093K21Rik	1700093K21Rik	TSS14338,TSS9290	chr11:23416202-23419942	-	-	0.112452	0.022448	0.202456	OK	0.228529	0.0944451	0.362613	OK	0.022079	0	0.0534118	OK
1700094C09Rik	-	-	1700094C09Rik	1700094C09Rik	TSS18520	chr8:12573048-12600738	-	-	0	0	0	OK	0.0292908	0	0.0695268	OK	0	0	0	OK
1700094D03Rik	-	-	1700094D03Rik	1700094D03Rik	TSS18707	chr3:89866717-89872269	-	-	1.58522	1.18228	1.98817	OK	1.64942	1.27688	2.02196	OK	0.813254	0.57906	1.04745	OK
1700096J18Rik	-	-	1700096J18Rik	1700096J18Rik	TSS18114	chr11:109208180-109214965	-	-	0.0411364	0	0.123596	OK	0.129367	0	0.274435	OK	0	0	0	OK
1700096K18Rik	-	-	1700096K18Rik	1700096K18Rik	TSS461	chr5:25035835-25037284	-	-	3.49117	2.58525	4.39709	OK	2.73003	2.04326	3.4168	OK	1.75503	1.21728	2.29279	OK
1700101E01Rik	-	-	1700101E01Rik	1700101E01Rik	TSS16375	chr2:28811000-28910586	-	-	0.431486	0.174942	0.688031	OK	0.595646	0.22728	0.964011	OK	0.0639657	0	0.154741	OK
1700102P08Rik	-	-	1700102P08Rik	1700102P08Rik	TSS5498	chr9:108295164-108300098	-	-	0.627383	0.317712	0.937055	OK	0.438205	0.214497	0.661912	OK	0.172864	0.0541122	0.291615	OK
1700106J16Rik	-	-	1700106J16Rik	1700106J16Rik	TSS4736	chr11:88107544-88108763	-	-	0.00944247	0	0.0305122	OK	0.0266625	0	0.0602166	OK	0.05935	0.00144892	0.117251	OK
1700106N22Rik	-	-	1700106N22Rik	1700106N22Rik	TSS23739	chr17:85490039-85857920	-	-	12.0054	9.9241	14.0868	OK	7.83902	6.41653	9.2615	OK	5.91578	4.73977	7.09179	OK
1700108F19Rik	-	-	1700108F19Rik	1700108F19Rik	TSS5761	chr14:77077374-77086915	-	-	0.0233458	0	0.0632874	OK	0.0142046	0	0.0417993	OK	0	0	0	OK
1700108J01Rik	-	-	1700108J01Rik	1700108J01Rik	TSS11039	chr14:122580915-122850368	-	-	0	0	0	OK	0.0172381	0	0.147349	OK	0	0	0	OK
1700108M19Rik	-	-	1700108M19Rik	1700108M19Rik	TSS11587,TSS20455	chr12:36934931-36979985	-	-	0	0	0	OK	0	0	0	OK	0	0	0	OK
1700109F18Rik	-	-	1700109F18Rik	1700109F18Rik	TSS17726	chr2:74548100-74586328	-	-	0	0	0	OK	0	0	0	OK	0	0	0	OK
1700109G14Rik	-	-	1700109G14Rik	1700109G14Rik	TSS16407	chr14:61911819-61924171	-	-	0.00632518	0	0.0270923	OK	0	0	0	OK	0	0	0	OK
1700109H08Rik	-	-	1700109H08Rik	1700109H08Rik	TSS4009	chr5:3571715-3637101	-	-	0.184663	0	0.653457	OK	0.243065	0	0.721978	OK	0	0	0	OK
1700110M21Rik	-	-	1700110M21Rik	1700110M21Rik	TSS22207	chr14:101596906-101599286	-	-	0	0	0	OK	0	0	0	OK	0	0	0	OK
1700111N16Rik	-	-	1700111N16Rik	1700111N16Rik	TSS5821	chrX:67182434-67396763	-	-	0	0	0	OK	0	0	0	OK	0	0	0	OK
1700112E06Rik	-	-	1700112E06Rik	1700112E06Rik	TSS22827	chr14:22838933-23913793	-	-	0.104231	0.00113316	0.207329	OK	0.167882	0.033273	0.302491	OK	0	0	0	OK
1700113H08Rik	-	-	1700113H08Rik	1700113H08Rik	TSS22121	chr10:86520790-86693344	-	-	0.0539083	0.000324981	0.107492	OK	0.0287711	0	0.0610343	OK	0	0	0	OK
1700113I22Rik	-	-	1700113I22Rik	1700113I22Rik	TSS13190	chr11:101280127-101296979	-	-	0.716057	0	1.5788	OK	0.605031	0	1.29187	OK	2.43912	0.910485	3.96775	OK
1700120K04Rik	-	-	1700120K04Rik	1700120K04Rik	TSS11979	chr7:134747416-134747959	-	-	0.206729	0.015877	0.397581	OK	0.427504	0.124876	0.730132	OK	0.33329	0.0731517	0.593428	OK
1700121N20Rik	-	-	1700121N20Rik	1700121N20Rik	TSS13226	chr12:107680861-107685876	-	-	0	0	0	OK	0	0	0	OK	0	0	0	OK
1700123I01Rik	-	-	1700123I01Rik	1700123I01Rik	TSS16102	chr19:6184409-6224219	-	-	0.0118595	0	0.0314741	OK	0.0137898	0	0.0327324	OK	0	0	0	OK
1700123K08Rik	-	-	1700123K08Rik	1700123K08Rik	TSS5874	chr5:139003067-139005922	-	-	0	0	0	OK	0	0	0	OK	0	0	0	OK
1700123L14Rik	-	-	1700123L14Rik	1700123L14Rik	TSS5579	chr6:96063147-96607191	-	-	0.0119904	0	0.0606928	OK	0.0411379	0	0.117607	OK	0	0	0	OK
1700123O20Rik	-	-	1700123O20Rik	1700123O20Rik	TSS15873	chr14:55260997-55309579	-	-	7.48716	2.915	12.0593	OK	5.07569	1.68849	8.4629	OK	12.5383	6.09179	18.9849	OK
1700125D06Rik	-	-	1700125D06Rik	1700125D06Rik	TSS5432	chr4:129168433-129169200	-	-	0.165447	0.00211509	0.328778	OK	0.0464929	0	0.120239	OK	0	0	0	OK
1700125H20Rik	-	-	1700125H20Rik	1700125H20Rik	TSS20032	chr11:84984597-84994656	-	-	0.00541533	0	0.0234644	OK	0	0	0	OK	0	0	0	OK
1700128F08Rik	-	-	1700128F08Rik	1700128F08Rik	TSS3634	chr9:8221888-8241987	-	-	0	0	0	OK	0	0	0	OK	0	0	0	OK
1700129C05Rik	-	-	1700129C05Rik	1700129C05Rik	TSS11163	chr14:59751876-59761730	-	-	0	0	0	OK	0.00491099	0	0.0184031	OK	0	0	0	OK
1810006K21Rik	-	-	1810006K21Rik	1810006K21Rik	TSS21474,TSS3136	chr19:10278691-10282314	-	-	162.941	137.162	188.721	OK	94.094	79.0797	109.108	OK	225.132	188.98	261.284	OK
1810008A18Rik	-	-	1810008A18Rik	1810008A18Rik	TSS23497	chr10:76949399-76978558	-	-	13.4334	11.3188	15.548	OK	9.51581	7.9968	11.0348	OK	16.4079	13.8364	18.9795	OK
1810009A15Rik	-	-	1810009A15Rik	1810009A15Rik	TSS10592	chr19:8963392-8965230	-	-	8.23422	6.02933	10.4391	OK	5.25853	3.74361	6.77345	OK	15.4878	12.3321	18.6435	OK
1810009J06Rik	-	-	1810009J06Rik	1810009J06Rik	TSS3369	chr6:40914770-40918426	-	-	0	0	0	OK	0.0876471	0.00492096	0.170373	OK	0	0	0	OK
1810010D01Rik	-	-	1810010D01Rik	1810010D01Rik	TSS12112	chr7:152391722-152394024	-	-	0.0263516	0	0.0674826	OK	1.5301	0.911674	2.14852	OK	0	0	0	OK
1810010H24Rik	-	-	1810010H24Rik	1810010H24Rik	TSS6528	chr11:106889536-106891756	-	-	3.62236	2.59551	4.6492	OK	2.54297	1.78612	3.29983	OK	2.9347	2.09567	3.77374	OK
1810011H11Rik	-	-	1810011H11Rik	1810011H11Rik	TSS7371	chr14:33599148-33631154	-	-	0	0	0	OK	0.0826963	0.0178841	0.147509	OK	0	0	0	OK
1810011O10Rik	-	-	1810011O10Rik	1810011O10Rik	TSS18674	chr8:25548087-25549418	-	-	3.79676	2.81585	4.77766	OK	6.05957	4.84898	7.27016	OK	30.0467	25.3445	34.7488	OK
1810012P15Rik	-	-	1810012P15Rik	1810012P15Rik	TSS10732	chr11:78640096-78657401	-	-	6.83425	5.76196	7.90654	OK	5.69342	4.80204	6.58481	OK	1.35509	1.0779	1.63229	OK
1810013D10Rik	-	-	1810013D10Rik	1810013D10Rik	TSS796	chr5:53658344-53669779	-	-	20.1293	16.6546	23.604	OK	15.8604	13.0527	18.6681	OK	77.6732	65.0941	90.2523	OK
1810013L24Rik	-	-	1810013L24Rik	1810013L24Rik	TSS24044	chr16:8830192-8859017	-	-	11.151	9.40469	12.8973	OK	9.15572	7.72148	10.59	OK	5.24182	4.40528	6.07835	OK
1810014B01Rik	-	-	1810014B01Rik	1810014B01Rik	TSS10778	chr10:86148271-86152699	-	-	3.16061	2.35122	3.96999	OK	2.19811	1.62595	2.77028	OK	2.146	1.57174	2.72027	OK
1810014F10Rik	-	-	1810014F10Rik	1810014F10Rik	TSS21762	chr7:147285368-147288305	-	-	19.6912	15.8529	23.5294	OK	12.3733	9.70602	15.0406	OK	64.1875	54.1421	74.2329	OK
1810019J16Rik	-	-	1810019J16Rik	1810019J16Rik	TSS4628	chr4:133074877-133086705	-	-	17.316	14.3764	20.2555	OK	13.4146	11.0233	15.8059	OK	1.62113	1.14187	2.10038	OK
1810020D17Rik	-	-	1810020D17Rik	1810020D17Rik	TSS19222	chr7:104698840-104728007	-	-	3.369	1.92538	4.81263	OK	2.49933	1.45248	3.54619	OK	1.73117	0.899964	2.56238	OK
1810022C23Rik	-	-	1810022C23Rik	1810022C23Rik	TSS15226	chr13:35016277-35055678	-	-	0.19928	0.0669404	0.331619	OK	0.408877	0.211449	0.606306	OK	0.0448804	0	0.0899167	OK
1810022K09Rik	-	-	1810022K09Rik	1810022K09Rik	TSS8496	chr3:14578670-14611256	-	-	5.5722	2.6358	8.5086	OK	3.95262	1.78355	6.12168	OK	1.86211	0.277246	3.44697	OK
1810024B03Rik	-	-	1810024B03Rik	1810024B03Rik	TSS10462	chr2:127012090-127034016	-	-	0.0761686	0.006697	0.14564	OK	0.1079	0.0278679	0.187932	OK	0	0	0	OK
1810026B05Rik	-	-	1810026B05Rik	1810026B05Rik	TSS19889	chr7:80571537-80703281	-	-	4.34266	3.05025	5.63507	OK	2.70391	1.65969	3.74812	OK	0.986643	0.570137	1.40315	OK
1810026J23Rik	-	-	1810026J23Rik	1810026J23Rik	TSS8173	chr9:21351337-21400391	-	-	18.6649	11.2004	26.1295	OK	12.5951	7.8057	17.3844	OK	19.8679	11.2859	28.4498	OK
1810027O10Rik	-	-	1810027O10Rik	1810027O10Rik	TSS11626	chr11:69652026-69653060	-	-	27.7244	21.8241	33.6247	OK	22.4474	17.4457	27.4492	OK	72.0123	59.9162	84.1084	OK
1810029B16Rik	-	-	1810029B16Rik	1810029B16Rik	TSS3747	chr8:69000244-69010406	-	-	1.60966	1.01139	2.20793	OK	1.30694	0.833216	1.78066	OK	1.9076	1.27644	2.53876	OK
1810030J14Rik	-	-	1810030J14Rik	1810030J14Rik	TSS7094	chr1:176260648-176263008	-	-	0	0	0	OK	0	0	0	OK	0	0	0	OK
1810030N24Rik	-	-	1810030N24Rik	1810030N24Rik	TSS3673	chr4:34715920-34725586	-	-	5.43381	4.0006	6.86703	OK	3.62713	2.62615	4.62811	OK	3.4787	2.48767	4.46974	OK
1810030O07Rik	-	-	1810030O07Rik	1810030O07Rik	TSS7135	chrX:12232009-12250672	-	-	14.6264	12.3379	16.9149	OK	10.932	9.22171	12.6423	OK	16.7318	14.0772	19.3864	OK
1810031K17Rik	-	-	1810031K17Rik	1810031K17Rik	TSS23212	chr1:75131788-75138942	-	-	9.99085	8.3964	11.5853	OK	8.64333	7.26762	10.019	OK	15.5053	13.0678	17.9428	OK
1810032O08Rik	-	-	1810032O08Rik	1810032O08Rik	TSS16182	chr11:116532973-116537112	-	-	1.2049	0.56671	1.84308	OK	1.21331	0.613993	1.81262	OK	2.4514	1.47356	3.42925	OK
1810033B17Rik	-	-	1810033B17Rik	1810033B17Rik	TSS23376	chr8:3665761-3668905	-	-	0.00796501	0	0.0279496	OK	0.0572527	0.00200785	0.112497	OK	0	0	0	OK
1810035L17Rik	-	-	1810035L17Rik	1810035L17Rik	TSS19423	chr12:88769027-88813249	-	-	21.3773	10.8542	31.9004	OK	17.2438	8.75324	25.7343	OK	89.9804	58.5128	121.448	OK
1810037I17Rik	-	-	1810037I17Rik	1810037I17Rik	TSS1996	chr3:122627314-122629112	-	-	24.9329	20.8157	29.05	OK	12.2564	10.0624	14.4503	OK	29.3626	24.7267	33.9985	OK
1810041L15Rik	-	-	1810041L15Rik	1810041L15Rik	TSS3626	chr15:84209632-84277527	-	-	1.01228	0.777292	1.24727	OK	1.76481	1.44274	2.08688	OK	0.426709	0.304712	0.548706	OK
1810043G02Rik	-	-	1810043G02Rik	1810043G02Rik	TSS17886	chr10:77441394-77448183	-	-	9.60185	7.93085	11.2728	OK	7.48487	6.15506	8.81468	OK	10.9496	9.15512	12.7442	OK
1810043H04Rik	-	-	1810043H04Rik	1810043H04Rik	TSS16190	chr11:119960247-119961738	-	-	12.2596	8.94441	15.5747	OK	11.7811	8.57897	14.9833	OK	22.9095	17.7888	28.0302	OK
1810046J19Rik	-	-	1810046J19Rik	1810046J19Rik	TSS16520	chr11:98273797-98300302	-	-	54.9239	46.2696	63.5782	OK	33.9482	28.2415	39.6549	OK	60.0199	50.6149	69.4248	OK
1810046K07Rik	-	-	1810046K07Rik	1810046K07Rik	TSS14688	chr9:51097790-51137022	-	-	0	0	0	OK	0.0130689	0	0.0337985	OK	0	0	0	OK
1810048J11Rik	-	-	1810048J11Rik	1810048J11Rik	TSS3341	chr12:73637343-73681200	-	-	4.01584	3.33252	4.69916	OK	3.56365	2.97109	4.15621	OK	3.88741	3.25205	4.52276	OK
1810049H13Rik	-	-	1810049H13Rik	1810049H13Rik	TSS16564	chr11:120317917-120319377	-	-	3.78469	2.5855	4.98389	OK	3.10631	2.09177	4.12086	OK	2.04567	1.27663	2.81471	OK
1810055G02Rik	-	-	1810055G02Rik	1810055G02Rik	TSS16925	chr19:3708332-3717881	-	-	3.10328	2.37675	3.82982	OK	1.95931	1.45244	2.46617	OK	16.6913	14.0804	19.3022	OK
1810058I24Rik	-	-	1810058I24Rik	1810058I24Rik	TSS10930,TSS4976	chr6:35202698-35212059	-	-	12.2741	9.73317	14.815	OK	8.36362	6.58034	10.1469	OK	19.1056	15.6762	22.5351	OK
1810062O18Rik	-	-	1810062O18Rik	1810062O18Rik	TSS7544	chr14:21318535-21437576	-	-	0.506005	0	2.63635	OK	0.365341	0	1.62187	OK	0.384582	0	1.53477	OK
1810063B05Rik	-	-	1810063B05Rik	1810063B05Rik	TSS20211	chr8:128946400-128949335	-	-	7.51062	5.57533	9.44591	OK	5.19939	3.77157	6.62722	OK	8.84133	6.756	10.9267	OK
1810063B07Rik	-	-	1810063B07Rik	1810063B07Rik	TSS6577	chr14:20894857-20902394	-	-	3.37383	2.63663	4.11104	OK	2.11787	1.61604	2.61969	OK	1.05641	0.732716	1.3801	OK
1810064F22Rik	-	-	1810064F22Rik	1810064F22Rik	TSS13691	chr9:22011229-22018304	-	-	0.0384795	0.00290067	0.0740583	OK	0.127762	0.0549097	0.200615	OK	0	0	0	OK
1810065E05Rik	-	-	1810065E05Rik	1810065E05Rik	TSS17732	chr11:58234612-58239525	-	-	0	0	0	OK	0	0	0	OK	0	0	0	OK
1810074P20Rik	-	-	1810074P20Rik	1810074P20Rik	TSS10492	chr4:25175732-25208968	-	-	21.4516	17.8418	25.0613	OK	15.2331	12.6653	17.8009	OK	10.1482	8.53723	11.7592	OK
2010000I03Rik	-	-	2010000I03Rik	2010000I03Rik	TSS2213	chrX:100688914-100701764	-	-	0.815445	0.569988	1.0609	OK	1.15501	0.876536	1.43349	OK	0.394569	0.25828	0.530859	OK
2010001E11Rik	-	-	2010001E11Rik	2010001E11Rik	TSS2700	chr10:39640187-39646729	-	-	0.0419904	0.00359536	0.0803854	OK	0.0307563	0.00265003	0.0588625	OK	0.0124563	0	0.0277999	OK
2010001M06Rik	-	-	2010001M06Rik	2010001M06Rik	TSS17630	chr5:135485021-135489027	-	-	0.356078	0	0.981566	OK	0.591274	0	1.35946	OK	0	0	0	OK
2010001M09Rik	-	-	2010001M09Rik	2010001M09Rik	TSS3952	chr18:35806918-35809021	-	-	0.329196	0.108488	0.549904	OK	0.459128	0.201378	0.716878	OK	0.614216	0.296809	0.931623	OK
2010002M12Rik	-	-	2010002M12Rik	2010002M12Rik	TSS6922	chr19:34691540-34715233	-	-	0.0267217	0.00199067	0.0514527	OK	0.0615067	0.0229056	0.100108	OK	0.0927748	0.0408982	0.144651	OK
2010002N04Rik	-	-	2010002N04Rik	2010002N04Rik	TSS7800	chr18:60633844-60661637	-	-	0.0364037	0	0.0728263	OK	0.345808	0.186131	0.505484	OK	0	0	0	OK
2010003K11Rik	-	-	2010003K11Rik	2010003K11Rik	TSS4126	chr19:4496787-4498583	-	-	0.0219067	0	0.0594478	OK	0	0	0	OK	0	0	0	OK
2010003K15Rik	-	-	2010003K15Rik	2010003K15Rik	TSS2014	chr10:25247748-25256078	-	-	0	0	0	OK	0	0	0	OK	0	0	0	OK
2010005H15Rik	-	-	2010005H15Rik	2010005H15Rik	TSS14469	chr16:36221647-36257513	-	-	0	0	0	OK	0	0	0	OK	0	0	0	OK
2010007H12Rik	-	-	2010007H12Rik	2010007H12Rik	TSS14276	chr5:138220145-138221335	-	-	6.32475	4.72441	7.9251	OK	5.61315	4.10709	7.11921	OK	10.117	7.7756	12.4585	OK
2010011I20Rik	-	-	2010011I20Rik	2010011I20Rik	TSS7178	chr2:172171076-172181249	-	-	45.2103	36.4347	53.986	OK	25.7505	21.1851	30.3159	OK	12.3432	10.389	14.2974	OK
2010012O05Rik	-	-	2010012O05Rik	2010012O05Rik	TSS20844	chr19:46764395-46777872	-	-	7.31335	6.03519	8.59152	OK	5.07695	4.18094	5.97297	OK	4.95519	4.07257	5.83782	OK
2010015L04Rik	-	-	2010015L04Rik	2010015L04Rik	TSS11413	chr4:154783298-154817219	-	-	2.69049	1.98047	3.4005	OK	1.97838	1.44899	2.50776	OK	3.05101	2.38331	3.7187	OK
2010016I18Rik	-	-	2010016I18Rik	2010016I18Rik	TSS4824	chr3:106284903-106303972	-	-	0.539982	0	1.08314	OK	0.633211	0.155487	1.11093	OK	0.151985	0	0.324965	OK
2010106E10Rik	-	-	2010106E10Rik	2010106E10Rik	TSS20831	chrX:109608882-109671952	-	-	0.0279812	0	0.0771579	OK	0.00407002	0	0.01943	OK	0	0	0	OK
2010106G01Rik	-	-	2010106G01Rik	2010106G01Rik	TSS19572	chr2:126716130-126758971	-	-	13.243	11.0913	15.3947	OK	11.7082	9.74583	13.6706	OK	5.22255	4.40613	6.03897	OK
2010107E04Rik	-	-	2010107E04Rik	2010107E04Rik	TSS5069	chr12:113199586-113205188	-	-	40.0425	31.8227	48.2624	OK	35.6071	28.327	42.8872	OK	209.101	176.414	241.789	OK
2010107G12Rik	-	-	2010107G12Rik	2010107G12Rik	TSS12111	chr6:34895294-34927999	-	-	0.790968	0.502766	1.07917	OK	0.785472	0.514298	1.05665	OK	0.0407246	0.00588715	0.0755621	OK
2010107G23Rik	-	-	2010107G23Rik	2010107G23Rik	TSS8675	chr10:61570403-61573761	-	-	4.71341	3.6889	5.73792	OK	4.14189	3.2463	5.03748	OK	2.74114	2.04446	3.43781	OK
2010107H07Rik	-	-	2010107H07Rik	2010107H07Rik	TSS10254	chr14:31937690-31942116	-	-	16.2948	11.8963	20.6934	OK	11.181	7.7801	14.5819	OK	57.4508	46.943	67.9586	OK
2010109I03Rik	-	-	2010109I03Rik	2010109I03Rik	TSS17837	chr15:74708765-74712134	-	-	0.0049781	0	0.0166218	OK	0.00888847	0	0.0229872	OK	0	0	0	OK
2010109K11Rik	-	-	2010109K11Rik	2010109K11Rik	TSS21282	chr12:33063653-33067808	-	-	1.93403	1.51484	2.35321	OK	1.77778	1.41439	2.14117	OK	0.505834	0.341719	0.669949	OK
2010110P09Rik	-	-	2010110P09Rik	2010110P09Rik	TSS15803	chr7:129363009-129366053	-	-	2.73295	1.89993	3.56597	OK	2.2172	1.53545	2.89895	OK	0	0	0	OK
2010111I01Rik	-	-	2010111I01Rik	2010111I01Rik	TSS4345	chr13:63116293-63400964	-	-	7.93663	6.67242	9.20084	OK	5.54666	4.6505	6.44282	OK	4.00941	3.32955	4.68926	OK
2010204K13Rik	-	-	2010204K13Rik	2010204K13Rik	TSS6047,TSS9	chrX:6988942-7000114	-	-	4.41022	2.72089	6.09955	OK	3.0786	1.78493	4.37227	OK	5.21476	3.36337	7.06615	OK
2010300C02Rik	-	-	2010300C02Rik	2010300C02Rik	TSS2560	chr1:37668520-37776656	-	-	4.20472	3.50164	4.90779	OK	4.66352	3.91594	5.4111	OK	0	0	0	OK
2010305A19Rik	-	-	2010305A19Rik	2010305A19Rik	TSS2777	chr4:108000756-108013323	-	-	2.47804	1.92601	3.03007	OK	2.266	1.78482	2.74719	OK	5.84545	4.88818	6.80273	OK
2010317E24Rik	-	-	2010317E24Rik	2010317E24Rik	TSS3078	chr2:25227840-25233733	-	-	0.260063	0.137982	0.382144	OK	0.110176	0.0470122	0.17334	OK	9.08239	7.65327	10.5115	OK
2010320M18Rik	-	-	2010320M18Rik	2010320M18Rik	TSS11031	chr8:73300760-73301505	-	-	8.35188	6.2507	10.4531	OK	6.8911	5.10746	8.67474	OK	9.04236	6.80842	11.2763	OK
2010321M09Rik	-	-	2010321M09Rik	2010321M09Rik	TSS15348,TSS2174	chr9:64808638-64834781	-	-	4.28166	3.42396	5.13935	OK	3.35277	2.69277	4.01278	OK	7.52887	6.19727	8.86047	OK
2200001I15Rik	-	-	2200001I15Rik	2200001I15Rik	TSS13244	chr14:35165067-35168579	-	-	0	0	0	OK	0.0272153	0	0.101985	OK	0	0	0	OK
2200002D01Rik	-	-	2200002D01Rik	2200002D01Rik	TSS13207	chr7:30023341-30033486	-	-	0.39459	0	1.18637	OK	0.506467	0	1.32968	OK	0	0	0	OK
2200002J24Rik	-	-	2200002J24Rik	2200002J24Rik	TSS5787	chr7:31483944-31485553	-	-	1.06853	0.504174	1.63289	OK	0.828323	0.376597	1.28005	OK	6.44601	4.58974	8.30227	OK
2200002K05Rik	-	-	2200002K05Rik	2200002K05Rik	TSS9401	chr9:15043488-15063857	-	-	0.166784	0.0655828	0.267984	OK	0.239429	0.117198	0.361659	OK	0	0	0	OK
2210009G21Rik	-	-	2210009G21Rik	2210009G21Rik	TSS121,TSS21047,TSS21057	chr2:136699516-136895514	-	-	2.85654	2.05821	3.65488	OK	2.12656	1.57726	2.67586	OK	1.60372	1.18349	2.02395	OK
2210010C04Rik	-	-	2210010C04Rik	2210010C04Rik	TSS17653	chr6:40980266-40985508	-	-	40.1034	31.7659	48.4409	OK	1110.77	0	2359.09	OK	0	0	0	OK
2210010C17Rik	-	-	2210010C17Rik	2210010C17Rik	TSS9934	chr7:20522653-20536092	-	-	0.0135633	0	0.0332884	OK	0.152987	0.0622013	0.243772	OK	0	0	0	OK
2210012G02Rik	-	-	2210012G02Rik	2210012G02Rik	TSS17817	chr4:106806766-106850971	-	-	1.8091	1.46441	2.15379	OK	1.46624	1.1889	1.74357	OK	0.872511	0.675669	1.06935	OK
2210013O21Rik	-	-	2210013O21Rik	2210013O21Rik	TSS23682	chrX:150158096-150175839	-	-	19.7972	16.2739	23.3206	OK	14.405	11.7488	17.0611	OK	28.0335	23.4874	32.5796	OK
2210015D19Rik	-	-	2210015D19Rik	2210015D19Rik	TSS3707	chr11:5613419-5684713	-	-	1.81445	0.553991	3.07491	OK	1.31519	0.450043	2.18034	OK	3.46104	1.78513	5.13695	OK
2210016F16Rik	-	-	2210016F16Rik	2210016F16Rik	TSS3535	chr13:58481406-58486586	-	-	9.88067	8.30689	11.4545	OK	7.3964	6.20749	8.58531	OK	7.53991	6.33252	8.74729	OK
2210016L21Rik	-	-	2210016L21Rik	2210016L21Rik	TSS20733	chr5:115392210-115398549	-	-	19.2443	16.1365	22.352	OK	16.8985	14.1899	19.6071	OK	25.3719	21.4018	29.342	OK
2210018M11Rik	-	-	2210018M11Rik	2210018M11Rik	TSS6744	chr7:105739115-105805079	-	-	7.41973	6.25076	8.58869	OK	5.81611	4.90263	6.72958	OK	10.159	8.53495	11.783	OK
2210020M01Rik	-	-	2210020M01Rik	2210020M01Rik	TSS6145	chr11:115753990-115794320	-	-	0.42513	0	0.900038	OK	0.771079	0.138077	1.40408	OK	0.144303	0	0.424714	OK
2210021J22Rik	-	-	2210021J22Rik	2210021J22Rik	TSS22584	chr15:85637401-85642127	-	-	6.42043	4.64504	8.19582	OK	4.45133	3.11261	5.79005	OK	9.41771	7.03384	11.8016	OK
2210403K04Rik	-	-	2210403K04Rik	2210403K04Rik	TSS19534	chr11:75275040-75280192	-	-	3.4794	2.64888	4.30992	OK	2.29202	1.71758	2.86646	OK	2.77926	2.12082	3.4377	OK
2210404J11Rik	-	-	2210404J11Rik	2210404J11Rik	TSS20934,TSS6142	chr17:15178575-15201196	-	-	8.73431	7.28545	10.1832	OK	7.49164	6.2201	8.76318	OK	7.33622	6.12311	8.54934	OK
2210404O07Rik	-	-	2210404O07Rik	2210404O07Rik	TSS4757	chr10:80855808-80857824	-	-	2.86257	1.72489	4.00024	OK	4.10863	2.73057	5.48669	OK	0.928714	0.427138	1.43029	OK
2210407C18Rik	-	-	2210407C18Rik	2210407C18Rik	TSS15099	chr11:58421707-58426994	-	-	0.15381	0.0175931	0.290026	OK	0.0655209	0.000288211	0.130754	OK	0	0	0	OK
2210408I21Rik	-	-	2210408I21Rik	2210408I21Rik	TSS9014	chr13:77274796-77752940	-	-	2.83795	2.11026	3.56564	OK	2.19973	1.6743	2.72516	OK	1.00254	0.653826	1.35125	OK
2210409E12Rik	-	-	2210409E12Rik	2210409E12Rik	TSS1926	chr11:88833951-88834328	-	-	0.0295157	0	0.109068	OK	0	0	0	OK	0	0	0	OK
2210411K11Rik	-	-	2210411K11Rik	2210411K11Rik	TSS10789	chr7:4736386-4741162	-	-	7.44381	5.74534	9.14229	OK	6.83242	5.24866	8.41618	OK	12.5655	10.1377	14.9933	OK
2210415F13Rik	-	-	2210415F13Rik	2210415F13Rik	TSS2562	chr11:58192533-58204043	-	-	0.281813	0.0011333	0.562492	OK	0.050463	0	0.109902	OK	0	0	0	OK
2210417A02Rik	-	-	2210417A02Rik	2210417A02Rik	TSS385	chr5:149553415-149554715	-	-	0.145378	0	0.296897	OK	0.17778	0.0191655	0.336395	OK	0.693765	0.273879	1.11365	OK
2300002M23Rik	-	-	2300002M23Rik	2300002M23Rik	TSS22332	chr17:35704429-35705890	-	-	0	0	0	OK	0	0	0	OK	0	0	0	OK
2300003K06Rik	-	-	2300003K06Rik	2300003K06Rik	TSS20511	chr11:99698461-99699380	-	-	0	0	0	OK	0	0	0	OK	0	0	0	OK
2300005B03Rik	-	-	2300005B03Rik	2300005B03Rik	TSS3661	chr15:74573268-74577117	-	-	0	0	0	OK	0	0	0	OK	0	0	0	OK
2300009A05Rik	-	-	2300009A05Rik	2300009A05Rik	TSS9185	chr9:63242253-63247051	-	-	26.7517	21.7518	31.7515	OK	19.4307	15.453	23.4084	OK	26.9359	21.8081	32.0636	OK
2310001A20Rik	-	-	2310001A20Rik	2310001A20Rik	TSS5320	chr2:150408816-150434259	-	-	13.6388	11.4646	15.813	OK	10.0973	8.48327	11.7114	OK	14.8848	12.5577	17.2119	OK
2310001K24Rik	-	-	2310001K24Rik	2310001K24Rik	TSS17071	chr2:163294438-163298739	-	-	0.143199	0	0.685811	OK	0.125171	0	0.597577	OK	1.6589	0	3.95132	OK
2310002J15Rik	-	-	2310002J15Rik	2310002J15Rik	TSS15800	chr2:25094338-25095417	-	-	0.00532799	0	0.0256366	OK	0.00909706	0	0.0340898	OK	0	0	0	OK
2310002L09Rik	-	-	2310002L09Rik	2310002L09Rik	TSS10514	chr4:73585274-73596750	-	-	0	0	0	OK	0	0	0	OK	0	0	0	OK
2310003C23Rik	-	-	2310003C23Rik	2310003C23Rik	TSS1001	chr2:180447250-180453222	-	-	9.09099	7.52172	10.6603	OK	6.11662	5.02641	7.20684	OK	12.6142	10.6193	14.6091	OK
2310003F16Rik	-	-	2310003F16Rik	2310003F16Rik	TSS6822	chr2:121282823-121284176	-	-	34.6734	28.6335	40.7132	OK	23.1676	18.949	27.3861	OK	90.5587	76.3897	104.728	OK
2310003H01Rik	-	-	2310003H01Rik	2310003H01Rik	TSS11585	chr11:120230875-120240060	-	-	4.62051	3.80181	5.43921	OK	4.36305	3.59674	5.12935	OK	7.08263	5.95416	8.21109	OK
2310003L22Rik	-	-	2310003L22Rik	2310003L22Rik	TSS2268	chr2:139996381-140030988	-	-	1.24374	0.879236	1.60824	OK	1.02679	0.731592	1.322	OK	2.7934	2.23139	3.35541	OK
2310004I24Rik	-	-	2310004I24Rik	2310004I24Rik	TSS2780	chr11:66851381-66866120	-	-	7.39098	5.94119	8.84076	OK	4.87819	3.87377	5.8826	OK	4.59324	3.6299	5.55658	OK
2310004N24Rik	-	-	2310004N24Rik	2310004N24Rik	TSS13061	chr11:116033201-116076632	-	-	11.9949	5.40109	18.5887	OK	8.30569	2.87083	13.7406	OK	20.932	8.81006	33.0539	OK
2310005G13Rik	-	-	2310005G13Rik	2310005G13Rik	TSS10276	chr16:57037079-57071459	-	-	0	0	0	OK	0.00158062	0	0.00592312	OK	0	0	0	OK
2310007A19Rik	-	-	2310007A19Rik	2310007A19Rik	TSS22952	chr3:94268906-94277513	-	-	1.39261	0.72877	2.05645	OK	1.29193	0.706141	1.87772	OK	3.71561	2.44659	4.98462	OK
2310007B03Rik	-	-	2310007B03Rik	2310007B03Rik	TSS16159,TSS17539	chr1:95047931-95057525	-	-	0.00774469	0	0.0273479	OK	0.015561	0	0.0374206	OK	0	0	0	OK
2310007L24Rik	-	-	2310007L24Rik	2310007L24Rik	TSS3100	chr11:106236139-106238428	-	-	1.42588	0.826269	2.02549	OK	0.766531	0.391145	1.14192	OK	0.0778571	0.00190073	0.153814	OK
2310008H04Rik	-	-	2310008H04Rik	2310008H04Rik	TSS12136	chr16:15887378-16146926	-	-	3.64281	2.55363	4.73199	OK	2.57616	1.83738	3.31495	OK	2.60988	2.11056	3.10919	OK
2310008H09Rik	-	-	2310008H09Rik	2310008H09Rik	TSS1206,TSS20543	chr7:125985731-126138725	-	-	6.99374	5.78093	8.20654	OK	5.49294	4.52888	6.457	OK	8.95879	6.05645	11.8611	OK
2310009B15Rik	-	-	2310009B15Rik	2310009B15Rik	TSS8957	chr1:140748555-140753431	-	-	2.83009	1.68351	3.97666	OK	2.30269	1.32906	3.27633	OK	7.24956	5.019	9.48012	OK
2310010M20Rik	-	-	2310010M20Rik	2310010M20Rik	TSS17838	chr16:32271694-32274865	-	-	0	0	0	OK	0.00862321	0	0.0253752	OK	0.0233356	0	0.0520801	OK
2310011J03Rik	-	-	2310011J03Rik	2310011J03Rik	TSS1016	chr10:79764564-79783293	-	-	11.511	9.51102	13.5109	OK	7.02826	5.58448	8.47204	OK	13.2872	10.7118	15.8625	OK
2310014H01Rik	-	-	2310014H01Rik	2310014H01Rik	TSS19773,TSS3660,TSS8831	chr17:36002539-36012541	-	-	0.113377	0.00715627	0.219597	OK	0.991609	0.683421	1.2998	OK	1.57406	1.14814	1.99999	OK
2310014L17Rik	-	-	2310014L17Rik	2310014L17Rik	TSS15432	chr7:13512764-13516421	-	-	0.0800179	0.028089	0.131947	OK	0.147548	0.0727739	0.222323	OK	0.31658	0.190613	0.442546	OK
2310015A10Rik	-	-	2310015A10Rik	2310015A10Rik	TSS11697	chr12:81221532-81233831	-	-	2.91139	2.39358	3.42919	OK	3.38764	2.83248	3.94281	OK	1.01753	0.786213	1.24885	OK
2310016C08Rik	-	-	2310016C08Rik	2310016C08Rik	TSS12343,TSS16202	chr6:29222487-29225449	-	-	3.05914	2.09472	4.02355	OK	2.23928	1.50012	2.97845	OK	1.85758	1.21172	2.50344	OK
2310016M24Rik	-	-	2310016M24Rik	2310016M24Rik	TSS15470	chr15:99556048-99558567	-	-	32.3991	26.9448	37.8535	OK	24.2587	20.0196	28.4979	OK	85.9371	72.3949	99.4793	OK
2310021H06Rik	-	-	2310021H06Rik	2310021H06Rik	TSS7206	chr2:153988342-153994182	-	-	0	0	0	OK	0	0	0	OK	0	0	0	OK
2310021P13Rik	-	-	2310021P13Rik	2310021P13Rik	TSS10985	chr14:21526773-21542840	-	-	23.1226	18.7939	27.4513	OK	23.0851	18.6196	27.5505	OK	32.1315	25.0075	39.2555	OK
2310022A10Rik	-	-	2310022A10Rik	2310022A10Rik	TSS3921,TSS5085	chr7:28338313-28367117	-	-	5.97341	4.91174	7.03507	OK	5.11895	4.20703	6.03087	OK	11.0427	9.30829	12.7771	OK
2310022B05Rik	-	-	2310022B05Rik	2310022B05Rik	TSS13382	chr8:127159655-127187269	-	-	40.2428	32.7744	47.7112	OK	35.3413	28.8674	41.8153	OK	8.22265	6.92927	9.51603	OK
2310028H24Rik	-	-	2310028H24Rik	2310028H24Rik	TSS10475	chr4:41465961-41516560	-	-	30.3141	24.9064	35.7217	OK	24.4385	20.5754	28.3016	OK	35.2724	29.3104	41.2344	OK
2310028O11Rik	-	-	2310028O11Rik	2310028O11Rik	TSS1200,TSS13338	chr4:138657728-138687028	-	-	19.8627	16.6673	23.0581	OK	13.2583	11.1273	15.3894	OK	39.1776	32.0197	46.3356	OK
2310030G06Rik	-	-	2310030G06Rik	2310030G06Rik	TSS8408	chr9:50547795-50554626	-	-	17.837	14.893	20.7809	OK	10.8701	8.99893	12.7412	OK	10.3801	8.56896	12.1913	OK
2310030N02Rik	-	-	2310030N02Rik	2310030N02Rik	TSS8788	chr4:10978194-11003351	-	-	3.05248	2.12069	3.98428	OK	2.36648	1.62836	3.1046	OK	9.69895	7.85431	11.5436	OK
2310033E01Rik	-	-	2310033E01Rik	2310033E01Rik	TSS4698	chr7:25326676-25331024	-	-	0.0585237	0	0.133621	OK	0.0387069	0	0.0918773	OK	0.0482671	0	0.107722	OK
2310033P09Rik	-	-	2310033P09Rik	2310033P09Rik	TSS19315	chr11:59021862-59024236	-	-	7.7336	6.14497	9.32224	OK	5.87951	4.62594	7.13309	OK	6.47417	5.12027	7.82807	OK
2310034C09Rik	-	-	2310034C09Rik	2310034C09Rik	TSS4657	chr16:88759091-88760034	-	-	0.0127237	0	0.0411152	OK	0	0	0	OK	0	0	0	OK
2310035C23Rik	-	-	2310035C23Rik	2310035C23Rik	TSS3895	chr1:107560437-107651708	-	-	7.19121	6.06129	8.32113	OK	7.03101	5.91356	8.14846	OK	4.51252	3.68266	5.34239	OK
2310035K24Rik	-	-	2310035K24Rik	2310035K24Rik	TSS14800	chr2:131036175-131039250	-	-	5.9822	4.70573	7.25868	OK	4.45492	3.44071	5.46913	OK	14.5182	12.146	16.8905	OK
2310036O22Rik	-	-	2310036O22Rik	2310036O22Rik	TSS5180	chr8:87550731-87554185	-	-	46.2366	38.9526	53.5205	OK	35.9673	30.2783	41.6563	OK	63.3738	53.4531	73.2944	OK
2310037I24Rik	-	-	2310037I24Rik	2310037I24Rik	TSS2621	chr15:98349531-98364652	-	-	5.77081	4.67789	6.86374	OK	4.15525	3.33516	4.97533	OK	5.62388	4.61005	6.63771	OK
2310039H08Rik	-	-	2310039H08Rik	2310039H08Rik	TSS236	chr17:46909583-46910356	-	-	17.8756	14.4866	21.2646	OK	12.1244	9.56078	14.688	OK	41.9227	35.2105	48.6349	OK
2310042D19Rik	-	-	2310042D19Rik	2310042D19Rik	TSS6573	chr4:155590035-155595416	-	-	1.17023	0.866555	1.47391	OK	1.53102	1.19558	1.86647	OK	0.084821	0.0378649	0.131777	OK
2310042E22Rik	-	-	2310042E22Rik	2310042E22Rik	TSS11582	chr16:21152731-21154017	-	-	0	0	0	OK	0	0	0	OK	0	0	0	OK
2310043J07Rik	-	-	2310043J07Rik	2310043J07Rik	TSS124	chr5:136533136-136540194	-	-	0	0	0	OK	0	0	0	OK	0	0	0	OK
2310044G17Rik	-	-	2310044G17Rik	2310044G17Rik	TSS19820,TSS7606	chr12:88287992-88306314	-	-	6.61192	5.51554	7.7083	OK	5.20564	4.3935	6.01777	OK	7.37716	6.21213	8.54219	OK
2310044H10Rik	-	-	2310044H10Rik	2310044H10Rik	TSS3876	chr7:51745307-51751883	-	-	49.7417	41.4479	58.0354	OK	40.9585	34.2768	47.6403	OK	104.187	82.3949	125.978	OK
2310045N01Rik	-	-	2310045N01Rik	2310045N01Rik	TSS10011	chr8:72663611-72671159	-	-	9.6548	7.18723	12.1224	OK	7.13681	5.17091	9.1027	OK	10.5303	8.01912	13.0415	OK
2310046A06Rik	-	-	2310046A06Rik	2310046A06Rik	TSS5157	chr9:76949890-77195677	-	-	0.00414632	0	0.0179658	OK	0.00892818	0	0.0262726	OK	0	0	0	OK
2310046K01Rik	-	-	2310046K01Rik	2310046K01Rik	TSS12321,TSS8233	chr2:151822246-151834994	-	-	0.0292517	0	0.0773521	OK	0.31755	0.170398	0.464703	OK	26.946	22.3931	31.4989	OK
2310046O06Rik	-	-	2310046O06Rik	2310046O06Rik	TSS21590	chr9:57385334-57390994	-	-	4.81015	3.83239	5.78792	OK	3.66671	2.95032	4.38311	OK	5.81856	4.71852	6.91861	OK
2310047B19Rik	-	-	2310047B19Rik	2310047B19Rik	TSS23795	chr9:21760196-21762714	-	-	8.49015	6.99263	9.98766	OK	5.52832	4.48729	6.56935	OK	11.0699	9.28261	12.8571	OK
2310047M10Rik	-	-	2310047M10Rik	2310047M10Rik	TSS15285	chr11:68873276-68875078	-	-	4.03472	3.12469	4.94475	OK	3.38633	2.59014	4.18252	OK	4.71589	3.71648	5.71529	OK
2310050B05Rik	-	-	2310050B05Rik	2310050B05Rik	TSS17101	chr10:80657435-80693524	-	-	0.0281243	0	0.184335	OK	0	0	0	OK	0.253217	0	1.56126	OK
2310050C09Rik	-	-	2310050C09Rik	2310050C09Rik	TSS10718	chr3:92672280-92674127	-	-	0	0	0	OK	0.00599849	0	0.0224784	OK	0	0	0	OK
2310057J16Rik	-	-	2310057J16Rik	2310057J16Rik	TSS21399	chr8:3587449-3609075	-	-	6.08948	5.02373	7.15524	OK	5.46909	4.54091	6.39726	OK	0	0	0	OK
2310057J18Rik	-	-	2310057J18Rik	2310057J18Rik	TSS7977	chr10:28692093-28706112	-	-	0.0106046	0	0.0317457	OK	0.0454562	0.00159415	0.0893182	OK	0	0	0	OK
2310057M21Rik	-	-	2310057M21Rik	2310057M21Rik	TSS4594	chr7:138486231-138506212	-	-	4.90503	3.94664	5.86342	OK	3.79356	3.05083	4.5363	OK	12.1678	10.2528	14.0827	OK
2310057N15Rik	-	-	2310057N15Rik	2310057N15Rik	TSS747	chr16:88773425-88774451	-	-	8.61486e-05	0	0.00224363	OK	0.000429133	0	0.00486012	OK	0	0	0	OK
2310061C15Rik	-	-	2310061C15Rik	2310061C15Rik	TSS1835	chr8:119412584-119445336	-	-	2.88393	2.08901	3.67886	OK	1.65532	1.14473	2.1659	OK	11.3715	9.47165	13.2713	OK
2310061I04Rik	-	-	2310061I04Rik	2310061I04Rik	TSS7729	chr17:36029621-36034323	-	-	14.7716	12.2579	17.2852	OK	10.6276	8.74835	12.5068	OK	29.0709	24.5267	33.6151	OK
2310061J03Rik	-	-	2310061J03Rik	2310061J03Rik	TSS16120	chr16:55973380-56009025	-	-	5.06875	3.04796	7.08954	OK	4.49154	2.55253	6.43056	OK	5.67405	3.52451	7.82359	OK
2310061N02Rik	-	-	2310061N02Rik	2310061N02Rik	TSS12281	chr16:88707415-88708207	-	-	0.13503	0.0104392	0.25962	OK	0.125648	0.0160097	0.235286	OK	0	0	0	OK
2310067B10Rik	-	-	2310067B10Rik	2310067B10Rik	TSS13911	chr11:115626746-115660347	-	-	14.0482	11.7631	16.3334	OK	16.3975	13.6222	19.1728	OK	14.2362	11.8537	16.6186	OK
2310068J16Rik	-	-	2310068J16Rik	2310068J16Rik	TSS15047	chr15:99800504-99846789	-	-	2.0082	0.222915	3.79349	OK	1.27913	0	2.96172	OK	1.2063	0.0462727	2.36632	OK
2310079F23Rik	-	-	2310079F23Rik	2310079F23Rik	TSS16337	chr5:35898857-35917719	-	-	1.22967	0.910254	1.54908	OK	1.30744	0.994644	1.62024	OK	1.84019	1.45425	2.22614	OK
2310079G19Rik	-	-	2310079G19Rik	2310079G19Rik	TSS1498	chr16:88627032-88627911	-	-	0.0289196	0	0.0761166	OK	0.00722279	0	0.0270663	OK	0	0	0	OK
2310079N02Rik	-	-	2310079N02Rik	2310079N02Rik	TSS1842	chr8:128258102-128272135	-	-	2.53087	1.73149	3.33024	OK	2.55228	1.78067	3.32388	OK	7.08958	5.5939	8.58527	OK
2400001E08Rik	-	-	2400001E08Rik	2400001E08Rik	TSS20536	chr7:109048321-109060417	-	-	24.7247	20.7265	28.7228	OK	16.8734	14.0741	19.6728	OK	54.7458	45.7837	63.7078	OK
2400003C14Rik	-	-	2400003C14Rik	2400003C14Rik	TSS13395	chr8:112138416-112217194	-	-	22.6092	19.021	26.1973	OK	17.3182	14.5745	20.0619	OK	37.9375	31.3087	44.5663	OK
2410001C21Rik	-	-	2410001C21Rik	2410001C21Rik	TSS19666	chr2:172266077-172295399	-	-	10.743	8.98857	12.4974	OK	7.85631	6.53584	9.17678	OK	17.166	14.4485	19.8835	OK
2410002F23Rik	-	-	2410002F23Rik	2410002F23Rik	TSS6294	chr7:51502091-51507689	-	-	13.6225	11.4453	15.7998	OK	11.3816	9.56142	13.2018	OK	30.356	25.3775	35.3344	OK
2410002I01Rik	-	-	2410002I01Rik	2410002I01Rik	TSS19246	chr11:119951835-119960045	-	-	6.02177	4.9886	7.05494	OK	4.41809	3.62576	5.21043	OK	5.88589	4.90966	6.86212	OK
2410002O22Rik	-	-	2410002O22Rik	2410002O22Rik	TSS20736	chr13:104932232-104968546	-	-	13.9683	11.3057	16.6309	OK	10.246	8.28588	12.2062	OK	10.2351	8.28151	12.1887	OK
2410003K15Rik	-	-	2410003K15Rik	2410003K15Rik	TSS15015	chr6:49023793-49034716	-	-	6.21081	4.51778	7.90384	OK	4.93015	3.52697	6.33332	OK	9.79861	7.55799	12.0392	OK
2410004A20Rik	-	-	2410004A20Rik	2410004A20Rik	TSS5050	chr9:72950204-72952250	-	-	0.224011	0.0916445	0.356377	OK	0.172414	0.0645165	0.280311	OK	0.11386	0.0310344	0.196685	OK
2410004B18Rik	-	-	2410004B18Rik	2410004B18Rik	TSS10055	chr3:145600995-145607239	-	-	4.14009	2.9521	5.32808	OK	3.60753	2.59416	4.62089	OK	5.5475	4.1968	6.8982	OK
2410006H16Rik	-	-	2410006H16Rik	2410006H16Rik	TSS7787	chr11:62416378-62418308	-	-	18.7033	14.2844	23.1223	OK	7.38369	5.07425	9.69313	OK	21.075	16.3464	25.8036	OK
2410012M07Rik	-	-	2410012M07Rik	2410012M07Rik	TSS11138	chr9:98765185-98766999	-	-	0.0167479	0	0.039003	OK	0.0164654	0	0.0371868	OK	0	0	0	OK
2410015M20Rik	-	-	2410015M20Rik	2410015M20Rik	TSS10419	chr17:56746874-56749194	-	-	38.9549	32.6866	45.2231	OK	23.7693	19.744	27.7947	OK	124.276	103.325	145.226	OK
2410016O06Rik	-	-	2410016O06Rik	2410016O06Rik	TSS11811	chr12:85291557-85293903	-	-	1.99514	1.46627	2.52402	OK	1.83997	1.34771	2.33223	OK	1.66005	1.18879	2.1313	OK
2410017I17Rik	-	-	2410017I17Rik	2410017I17Rik	TSS3221	chr17:36281962-36299319	-	-	0.00341761	0	0.0146385	OK	0	0	0	OK	0	0	0	OK
2410018L13Rik	-	-	2410018L13Rik	2410018L13Rik	TSS13650	chr12:22990696-23046943	-	-	0.0322757	0	0.0719936	OK	0.0318776	0	0.0674644	OK	0.0245988	0	0.0546809	OK
2410022L05Rik	-	-	2410022L05Rik	2410022L05Rik	TSS23994	chr8:13884787-13890271	-	-	5.87914	4.28368	7.4746	OK	3.86454	2.71854	5.01054	OK	13.3633	10.8169	15.9097	OK
2410042D21Rik	-	-	2410042D21Rik	2410042D21Rik	TSS2384	chr2:112219367-112254394	-	-	3.67187	2.95027	4.39347	OK	3.39986	2.78748	4.01224	OK	1.84129	1.43121	2.25136	OK
2410066E13Rik	-	-	2410066E13Rik	2410066E13Rik	TSS7934	chr6:54631765-54650400	-	-	7.16092	5.79341	8.52842	OK	5.96882	4.84484	7.0928	OK	1.38759	0.943647	1.83153	OK
2410075B13Rik	-	-	2410075B13Rik	2410075B13Rik	TSS22352	chr15:75810301-75812715	-	-	7.70649	6.40245	9.01052	OK	4.91003	4.01659	5.80348	OK	0.0141964	0	0.0365318	OK
2410076I21Rik	-	-	2410076I21Rik	2410076I21Rik	TSS6224	chr9:58430046-58589366	-	-	0.133827	0	0.808439	OK	0.256284	0	1.03845	OK	0.162148	0	0.971111	OK
2410089E03Rik	-	-	2410089E03Rik	2410089E03Rik	TSS13186	chr15:8119105-8221158	-	-	4.53948	3.82452	5.25443	OK	4.88119	4.09543	5.66694	OK	2.46083	2.07501	2.84665	OK
2410091C18Rik	-	-	2410091C18Rik	2410091C18Rik	TSS14883	chr17:79336474-79347392	-	-	4.97097	4.0162	5.92574	OK	3.29689	2.63659	3.95718	OK	6.08995	5.04735	7.13255	OK
2410127L17Rik	-	-	2410127L17Rik	2410127L17Rik	TSS9545	chr19:18745269-18779282	-	-	2.66922	2.0091	3.32935	OK	1.83628	1.37067	2.30189	OK	2.04583	1.53134	2.56033	OK
2410131K14Rik	-	-	2410131K14Rik	2410131K14Rik	TSS15569	chr5:118695235-118713123	-	-	6.41615	5.31431	7.51799	OK	4.44843	3.64197	5.25489	OK	9.4704	7.97493	10.9659	OK
2410137F16Rik	-	-	2410137F16Rik	2410137F16Rik	TSS4070	chr5:116888730-117041826	-	-	0.0908449	0	0.198085	OK	0.072742	0	0.157586	OK	0.247066	0.0206495	0.473482	OK
2410137M14Rik	-	-	2410137M14Rik	2410137M14Rik	TSS17107	chr17:37114645-37118182	-	-	0	0	0	OK	0	0	0	OK	0	0	0	OK
2500003M10Rik	-	-	2500003M10Rik	2500003M10Rik	TSS2133	chr3:90302879-90313365	-	-	20.6764	17.3617	23.9912	OK	16.8988	14.1777	19.62	OK	16.3135	13.7028	18.9241	OK
2510002D24Rik	-	-	2510002D24Rik	2510002D24Rik	TSS20030	chr16:18836672-18840206	-	-	12.0579	9.88862	14.2271	OK	7.63118	6.14672	9.11564	OK	11.719	9.68715	13.7508	OK
2510003E04Rik	-	-	2510003E04Rik	2510003E04Rik	TSS23953	chr10:62021217-62041205	-	-	26.9098	22.6041	31.2155	OK	18.5511	15.6238	21.4783	OK	20.3833	17.149	23.6176	OK
2510006D16Rik	-	-	2510006D16Rik	2510006D16Rik	TSS19191	chr4:129277950-129285123	-	-	27.5107	22.8319	32.1895	OK	22.4763	18.586	26.3667	OK	76.2879	64.2724	88.3034	OK
2510009E07Rik	-	-	2510009E07Rik	2510009E07Rik	TSS13294	chr16:21649117-21694738	-	-	12.3728	10.3941	14.3515	OK	10.5271	8.82561	12.2286	OK	2.52142	2.09206	2.95078	OK
2510012J08Rik	-	-	2510012J08Rik	2510012J08Rik	TSS5122	chr10:80783847-80788996	-	-	5.67118	4.66922	6.67315	OK	5.38583	4.4431	6.32856	OK	13.1158	11.0621	15.1695	OK
2510039O18Rik	-	-	2510039O18Rik	2510039O18Rik	TSS21314	chr4:147315003-147321423	-	-	27.1134	22.7096	31.5171	OK	21.8402	18.3598	25.3206	OK	16.0756	13.5558	18.5953	OK
2510049J12Rik	-	-	2510049J12Rik	2510049J12Rik	TSS8820	chr6:115533564-115542594	-	-	3.69721	2.95061	4.44382	OK	2.53148	1.99964	3.06333	OK	0.0107406	0	0.0239708	OK
2610001J05Rik	-	-	2610001J05Rik	2610001J05Rik	TSS1414	chr6:13819073-13821483	-	-	8.67596	7.13628	10.2156	OK	6.52482	5.37558	7.67407	OK	2.156	1.59582	2.71619	OK
2610002D18Rik	-	-	2610002D18Rik	2610002D18Rik	TSS20067	chr4:134066913-134079837	-	-	0.0586281	0	0.119973	OK	0.0628818	0.00677893	0.118985	OK	4.80514	3.73883	5.87146	OK
2610002I17Rik	-	-	2610002I17Rik	2610002I17Rik	TSS4966	chr9:110207695-110224606	-	-	2.17461	1.59446	2.75475	OK	1.42569	1.00685	1.84452	OK	5.10467	4.15036	6.05898	OK
2610002J02Rik	-	-	2610002J02Rik	2610002J02Rik	TSS7749	chr4:154624074-154630796	-	-	13.8573	11.5018	16.2128	OK	10.1815	7.99782	12.3652	OK	12.7665	10.2675	15.2654	OK
2610002M06Rik	-	-	2610002M06Rik	2610002M06Rik	TSS13417	chrX:104978090-105011673	-	-	5.55715	4.68357	6.43073	OK	4.72277	3.98443	5.46111	OK	2.46034	2.05436	2.86633	OK
2610005L07Rik	-	-	2610005L07Rik	2610005L07Rik	TSS3886	chr8:19981359-20020392	-	-	7.34472	3.39247	11.297	OK	7.08094	3.09469	11.0672	OK	1.44692	0.697456	2.19638	OK
2610008E11Rik	-	-	2610008E11Rik	2610008E11Rik	TSS1290	chr10:78527118-78560345	-	-	5.71399	4.79201	6.63598	OK	4.47424	3.76054	5.18795	OK	1.06964	0.821576	1.3177	OK
2610015P09Rik	-	-	2610015P09Rik	2610015P09Rik	TSS5141	chr16:43890014-43964427	-	-	3.39632	2.76962	4.02303	OK	2.71546	2.2221	3.20882	OK	1.51171	1.17743	1.84599	OK
2610017I09Rik	-	-	2610017I09Rik	2610017I09Rik	TSS16625	chr1:42705044-42751670	-	-	0	0	0	OK	0	0	0	OK	0	0	0	OK
2610018G03Rik	-	-	2610018G03Rik	2610018G03Rik	TSS23042	chrX:48194612-48245027	-	-	13.8346	11.6052	16.064	OK	8.30267	6.94481	9.66054	OK	6.20787	5.12292	7.29282	OK
2610019F03Rik	-	-	2610019F03Rik	2610019F03Rik	TSS4280	chr8:13952007-13974777	-	-	2.94018	2.28673	3.59363	OK	2.5874	2.0333	3.1415	OK	0.949784	0.661141	1.23843	OK
2610020H08Rik	-	-	2610020H08Rik	2610020H08Rik	TSS22396,TSS2439	chr7:126937643-126992455	-	-	0.999831	0.543519	1.45614	OK	0.962523	0.579625	1.34542	OK	1.5846	1.07	2.0992	OK
2610021K21Rik	-	-	2610021K21Rik	2610021K21Rik	TSS16984	chr12:100955740-101121652	-	-	0.201509	0.0850142	0.318004	OK	0.0979207	0.0336958	0.162146	OK	0.986714	0.66809	1.30534	OK
2610024G14Rik	-	-	2610024G14Rik	2610024G14Rik	TSS12803	chr5:77723193-77739111	-	-	6.8045	5.60713	8.00188	OK	5.04009	4.12107	5.9591	OK	8.45669	7.07179	9.84159	OK
2610027L16Rik	-	-	2610027L16Rik	2610027L16Rik	TSS2875	chr14:56364529-56377261	-	-	2.30898	1.83035	2.78761	OK	2.0514	1.63165	2.47116	OK	7.69134	6.48123	8.90146	OK
2610028E06Rik	-	-	2610028E06Rik	2610028E06Rik	TSS11320	chr4:125565094-125599554	-	-	0	0	0	OK	0.00299118	0	0.00880203	OK	0	0	0	OK
2610028H24Rik	-	-	2610028H24Rik	2610028H24Rik	TSS13089	chr10:75911825-75978602	-	-	0.168827	0	0.569441	OK	0.227195	0	0.635798	OK	0	0	0	OK
2610029G23Rik	-	-	2610029G23Rik	2610029G23Rik	TSS5361	chrX:102275113-102280525	-	-	3.8878	3.11386	4.66173	OK	2.67311	2.13553	3.21069	OK	6.98427	5.85345	8.11508	OK
2610029I01Rik	-	-	2610029I01Rik	2610029I01Rik	TSS20759	chr4:21684528-21694358	-	-	5.18267	4.06548	6.29987	OK	3.16176	2.43251	3.89102	OK	7.09354	5.81658	8.3705	OK
2610034B18Rik	-	-	2610034B18Rik	2610034B18Rik	TSS20305	chr7:87070244-87080150	-	-	12.1325	10.1898	14.0752	OK	10.2403	8.60734	11.8732	OK	9.81287	8.24665	11.3791	OK
2610034M16Rik	-	-	2610034M16Rik	2610034M16Rik	TSS8554	chr17:59018230-59130798	-	-	0	0	0	OK	0	0	0	OK	0	0	0	OK
2610035D17Rik	-	-	2610035D17Rik	2610035D17Rik	TSS15535	chr11:112905219-113063152	-	-	2.356	1.71612	2.99588	OK	2.30405	1.7061	2.90199	OK	4.26727	3.3787	5.15584	OK
2610039C10Rik	-	-	2610039C10Rik	2610039C10Rik	TSS2938	chr16:90719556-90727616	-	-	1.0297	0.612595	1.44681	OK	1.10994	0.701401	1.51848	OK	8.00584	6.45902	9.55266	OK
2610044O15Rik	-	-	2610044O15Rik	2610044O15Rik	TSS329	chr17:95214078-95233760	-	-	1.72383	1.15751	2.29015	OK	2.06941	1.49401	2.64481	OK	1.79138	1.26586	2.3169	OK
2610100L16Rik	-	-	2610100L16Rik	2610100L16Rik	TSS14765	chr3:17689920-17700071	-	-	0	0	0	OK	0	0	0	OK	0	0	0	OK
2610101N10Rik	-	-	2610101N10Rik	2610101N10Rik	TSS9109	chr9:95357312-95412415	-	-	6.8256	5.7099	7.9413	OK	6.56717	5.50293	7.63142	OK	8.71635	7.2192	10.2135	OK
2610109H07Rik	-	-	2610109H07Rik	2610109H07Rik	TSS2022	chr4:147472545-147504807	-	-	0.011506	0	0.0233763	OK	0.0218478	0.00472485	0.0389707	OK	0.0208701	0.00458064	0.0371595	OK
2610203C20Rik	-	-	2610203C20Rik	2610203C20Rik	TSS21394	chr9:41389421-41400570	-	-	0.471437	0.275691	0.667183	OK	1.63042	1.24409	2.01675	OK	0	0	0	OK
2610203C22Rik	-	-	2610203C22Rik	2610203C22Rik	TSS2090	chr1:9538126-9621173	-	-	0.024763	0	0.0694929	OK	0.0773236	0	0.172897	OK	0.0482419	0	0.109952	OK
2610204G22Rik	-	-	2610204G22Rik	2610204G22Rik	TSS3982	chr4:155135300-155137669	-	-	0.475241	0.0841738	0.866307	OK	0.418661	0.0925044	0.744817	OK	0.0832609	0	0.166811	OK
2610301B20Rik	-	-	2610301B20Rik	2610301B20Rik	TSS12972	chr4:10801644-10826570	-	-	12.7944	10.7467	14.8422	OK	8.78551	7.3664	10.2046	OK	4.83332	3.95262	5.71403	OK
2610301G19Rik	-	-	2610301G19Rik	2610301G19Rik	TSS3090	chr14:70499951-70553598	-	-	11.0552	9.12052	12.9899	OK	10.047	8.31733	11.7768	OK	14.8329	12.1904	17.4753	OK
2610305D13Rik	-	-	2610305D13Rik	2610305D13Rik	TSS5555	chr4:146986044-147016617	-	-	2.21794	1.68218	2.7537	OK	1.90164	1.48546	2.31782	OK	0	0	0	OK
2610306M01Rik	-	-	2610306M01Rik	2610306M01Rik	TSS10740	chr6:86798400-86799434	-	-	3.75466	2.67322	4.83611	OK	2.61207	1.8051	3.41904	OK	4.25852	3.13593	5.38111	OK
2610318N02Rik	-	-	2610318N02Rik	2610318N02Rik	TSS21325	chr16:17113490-17125199	-	-	0.23498	0.0764233	0.393536	OK	0.171514	0.057798	0.28523	OK	5.30842	4.16572	6.45113	OK
2610507B11Rik	-	-	2610507B11Rik	2610507B11Rik	TSS221	chr11:78075255-78104127	-	-	23.7946	19.0203	28.5688	OK	24.0026	18.7752	29.2301	OK	27.833	21.2488	34.4172	OK
2610524H06Rik	-	-	2610524H06Rik	2610524H06Rik	TSS15505	chr5:115271945-115273477	-	-	10.0946	7.97289	12.2164	OK	7.30974	5.73779	8.8817	OK	18.1306	15.0929	21.1682	OK
2610528E23Rik	-	-	2610528E23Rik	2610528E23Rik	TSS5317	chr16:57302112-57606980	-	-	1.79539	1.14495	2.44583	OK	1.49461	0.842685	2.14653	OK	5.86741	4.59897	7.13585	OK
2610528J11Rik	-	-	2610528J11Rik	2610528J11Rik	TSS11237	chr4:118199879-118202822	-	-	0.845614	0.431951	1.25928	OK	1.05829	0.59736	1.51923	OK	0	0	0	OK
2700007P21Rik	-	-	2700007P21Rik	2700007P21Rik	TSS20568,TSS4527	chr2:106802685-106814554	-	-	6.89867	5.76834	8.02901	OK	5.34591	4.48271	6.20911	OK	4.95775	4.14583	5.76967	OK
2700023E23Rik	-	-	2700023E23Rik	2700023E23Rik	TSS6557	chr5:74489107-74490361	-	-	1.16246	0.660076	1.66484	OK	1.12993	0.686502	1.57336	OK	1.01298	0.582004	1.44396	OK
2700029M09Rik	-	-	2700029M09Rik	2700029M09Rik	TSS1302	chr8:63369247-63386369	-	-	7.51343	5.90891	9.11795	OK	5.35368	4.19959	6.50777	OK	9.58511	7.82247	11.3477	OK
2700046A07Rik	-	-	2700046A07Rik	2700046A07Rik	TSS13672	chr18:62911327-62916001	-	-	0	0	0	OK	0	0	0	OK	0	0	0	OK
2700046G09Rik	-	-	2700046G09Rik	2700046G09Rik	TSS1798	chr19:32463705-32465674	-	-	3.85645	2.94911	4.76378	OK	2.99046	2.28848	3.69244	OK	1.74048	1.23927	2.24168	OK
2700049A03Rik	-	-	2700049A03Rik	2700049A03Rik	TSS7740	chr12:72237834-72344290	-	-	2.44127	1.9244	2.95814	OK	2.43878	2.01667	2.86089	OK	3.42087	2.81204	4.02969	OK
2700050L05Rik	-	-	2700050L05Rik	2700050L05Rik	TSS6884	chr7:140829357-140864700	-	-	4.45229	3.73228	5.1723	OK	3.46196	2.90438	4.01954	OK	4.91303	4.14294	5.68313	OK
2700060E02Rik	-	-	2700060E02Rik	2700060E02Rik	TSS21127	chr14:20570478-20643045	-	-	4.85303	3.75023	5.95582	OK	2.994	2.0496	3.9384	OK	6.72122	5.46464	7.97779	OK
2700062C07Rik	-	-	2700062C07Rik	2700062C07Rik	TSS12105	chr18:24629371-24636268	-	-	5.05001	3.75477	6.34525	OK	3.50493	2.5731	4.43675	OK	6.07345	4.74659	7.40031	OK
2700078E11Rik	-	-	2700078E11Rik	2700078E11Rik	TSS550	chr19:60600598-60656926	-	-	12.0347	10.0852	13.9843	OK	9.3749	7.89911	10.8507	OK	7.36367	6.18026	8.54708	OK
2700078K21Rik	-	-	2700078K21Rik	2700078K21Rik	TSS20401	chr7:149194457-149246939	-	-	9.59725	7.84719	11.3473	OK	7.24114	5.86888	8.61341	OK	11.2567	9.38057	13.1329	OK
2700081O15Rik	-	-	2700081O15Rik	2700081O15Rik	TSS3077	chr19:7492114-7557779	-	-	3.90518	0.826461	6.98391	OK	5.78179	2.20029	9.36329	OK	1.97483	0	4.97355	OK
2700086A05Rik	-	-	2700086A05Rik	2700086A05Rik	TSS16807	chr6:52119060-52163596	-	-	0	0	0	OK	0	0	0	OK	0	0	0	OK
2700089E24Rik	-	-	2700089E24Rik	2700089E24Rik	TSS8757	chr6:133055256-133057764	-	-	32.3086	27.01	37.6073	OK	20.2372	16.9755	23.4988	OK	15.3854	12.9752	17.7956	OK
2700094K13Rik	-	-	2700094K13Rik	2700094K13Rik	TSS21716	chr2:84509377-84510865	-	-	7.85439	5.57146	10.1373	OK	6.59613	4.592	8.60025	OK	89.5996	75.3165	103.883	OK
2700097O09Rik	-	-	2700097O09Rik	2700097O09Rik	TSS13648	chr12:56146647-56181097	-	-	2.57553	1.56701	3.58405	OK	1.95239	1.22243	2.68236	OK	2.67312	1.78248	3.56376	OK
2700099C18Rik	-	-	2700099C18Rik	2700099C18Rik	TSS17853	chr17:95149439-95174469	-	-	0.347723	0.146425	0.549021	OK	0.173814	0.0650407	0.282588	OK	3.65371	2.77302	4.53439	OK
2810001G20Rik	-	-	2810001G20Rik	2810001G20Rik	TSS14644	chr11:63892985-63896761	-	-	5.3048	3.84928	6.76031	OK	4.34426	3.15563	5.5329	OK	2.74582	1.85496	3.63669	OK
2810002D19Rik	-	-	2810002D19Rik	2810002D19Rik	TSS21096	chr2:94246863-94251837	-	-	1.25656	0.801458	1.71167	OK	0.982298	0.628878	1.33572	OK	0.545516	0.307542	0.783491	OK
2810002N01Rik	-	-	2810002N01Rik	2810002N01Rik	TSS20879	chr12:112951479-112993266	-	-	14.7934	12.0239	17.563	OK	11.3115	9.21369	13.4094	OK	21.3905	17.8401	24.9409	OK
2810004N23Rik	-	-	2810004N23Rik	2810004N23Rik	TSS21828	chr8:127363254-127386929	-	-	7.47858	5.98381	8.97336	OK	5.40269	4.29169	6.51368	OK	11.4771	9.52939	13.4249	OK
2810006K23Rik	-	-	2810006K23Rik	2810006K23Rik	TSS4746	chr5:124700967-124791853	-	-	4.54992	3.02981	6.07003	OK	3.18344	1.874	4.49289	OK	3.45365	1.94496	4.96233	OK
2810007J24Rik	-	-	2810007J24Rik	2810007J24Rik	TSS23196,TSS2640	chr7:14996034-15031936	-	-	0	0	0	OK	0	0	0	OK	0	0	0	OK
2810008D09Rik	-	-	2810008D09Rik	2810008D09Rik	TSS20619	chr11:116938096-116940269	-	-	14.3843	11.1144	17.6541	OK	15.8088	12.4623	19.1552	OK	7.14506	5.09493	9.1952	OK
2810008M24Rik	-	-	2810008M24Rik	2810008M24Rik	TSS11467	chr13:108834667-108839340	-	-	6.56906	5.32441	7.81371	OK	4.95745	4.03674	5.87817	OK	5.64742	4.61761	6.67723	OK
2810021B07Rik	-	-	2810021B07Rik	2810021B07Rik	TSS19409	chr13:17787246-17790939	-	-	4.38879	3.55491	5.22268	OK	3.95296	3.24917	4.65675	OK	2.21939	1.73852	2.70025	OK
2810021J22Rik	-	-	2810021J22Rik	2810021J22Rik	TSS10608	chr11:58680741-58697840	-	-	2.87896	2.36659	3.39133	OK	2.19419	1.80394	2.58444	OK	1.26335	0.999721	1.52699	OK
2810025M15Rik	-	-	2810025M15Rik	2810025M15Rik	TSS12864	chr1:159065313-159350367	-	-	4.38666	2.25042	6.52291	OK	3.52563	1.38872	5.66253	OK	43.827	32.029	55.625	OK
2810030E01Rik	-	-	2810030E01Rik	2810030E01Rik	TSS13510	chr2:17965713-17970076	-	-	0.778968	0.552799	1.00514	OK	0.799468	0.588814	1.01012	OK	2.53851	2.07731	2.9997	OK
2810032G03Rik	-	-	2810032G03Rik	2810032G03Rik	TSS23006	chr12:5383307-5422938	-	-	0.147021	0.0351867	0.258855	OK	0.176586	0.0635532	0.289618	OK	0.212373	0.0838389	0.340907	OK
2810046L04Rik	-	-	2810046L04Rik	2810046L04Rik	TSS4919	chr3:53267738-53285677	-	-	4.41396	3.67936	5.14856	OK	4.62389	3.88209	5.36568	OK	6.35359	5.35901	7.34816	OK
2810047C21Rik1	-	-	2810047C21Rik1	2810047C21Rik1	TSS16170	chr7:10034292-10041283	-	-	0.702176	0.407023	0.997329	OK	0.493507	0.279704	0.70731	OK	3.06342	2.35078	3.77606	OK
2810055F11Rik	-	-	2810055F11Rik	2810055F11Rik	TSS9593	chr12:73174414-73186300	-	-	0.325359	0.154039	0.496679	OK	0.379604	0.198273	0.560935	OK	0.2457	0.109683	0.381717	OK
2810055G20Rik	-	-	2810055G20Rik	2810055G20Rik	TSS7620	chr16:77329572-77558673	-	-	0.00842211	0	0.0202945	OK	0.0319494	0.00690945	0.0569893	OK	0.0260794	0.00377003	0.0483887	OK
2810403A07Rik	-	-	2810403A07Rik	2810403A07Rik	TSS23623	chr3:88489715-88516855	-	-	17.7634	14.9466	20.5802	OK	15.7257	13.2283	18.2232	OK	13.6125	11.4705	15.7545	OK
2810403D21Rik	-	-	2810403D21Rik	2810403D21Rik	TSS854	chrX:106029816-106082235	-	-	0.54397	0.250442	0.837499	OK	0.332521	0.141887	0.523155	OK	0.0990302	0.0143158	0.183745	OK
2810405F15Rik	-	-	2810405F15Rik	2810405F15Rik	TSS18607	chr2:115900283-115901832	-	-	0.0840453	0.0140773	0.154013	OK	0.175473	0.0686651	0.282281	OK	0.0856851	0.0188065	0.152564	OK
2810405K02Rik	-	-	2810405K02Rik	2810405K02Rik	TSS4236	chr4:154270538-154273152	-	-	4.72375	3.31024	6.13726	OK	4.82559	3.44758	6.2036	OK	0	0	0	OK
2810407C02Rik	-	-	2810407C02Rik	2810407C02Rik	TSS22559	chr3:58380579-58397466	-	-	43.586	35.359	51.813	OK	32.5533	26.3561	38.7505	OK	42.9312	34.051	51.8113	OK
2810408A11Rik	-	-	2810408A11Rik	2810408A11Rik	TSS19299	chr11:69710859-69714488	-	-	0.0532485	0.00408954	0.102407	OK	0.0780165	0.0186071	0.137426	OK	0.0365357	0.000891948	0.0721794	OK
2810408M09Rik	-	-	2810408M09Rik	2810408M09Rik	TSS20383	chr2:165315611-165318814	-	-	5.09256	4.05081	6.13431	OK	3.73416	2.92718	4.54115	OK	7.80368	6.45449	9.15288	OK
2810410L24Rik	-	-	2810410L24Rik	2810410L24Rik	TSS21578	chr11:120047963-120051170	-	-	1.657	1.14024	2.17377	OK	1.98569	1.42862	2.54275	OK	0.248095	0.110752	0.385438	OK
2810417H13Rik	-	-	2810417H13Rik	2810417H13Rik	TSS855	chr9:65676732-65756601	-	-	0.334201	0	0.671459	OK	0.357213	0.0466596	0.667767	OK	13.0809	10.4879	15.6739	OK
2810422J05Rik	-	-	2810422J05Rik	2810422J05Rik	TSS20664	chr8:73037294-73047079	-	-	11.4348	9.35966	13.51	OK	8.14424	6.59893	9.68955	OK	15.0347	12.5838	17.4855	OK
2810422O20Rik	-	-	2810422O20Rik	2810422O20Rik	TSS14859	chr1:165925075-165927374	-	-	3.07921	2.251	3.90742	OK	2.06836	1.49106	2.64565	OK	1.29327	0.865369	1.72117	OK
2810428I15Rik	-	-	2810428I15Rik	2810428I15Rik	TSS4024	chr8:73028194-73030638	-	-	16.6762	13.1955	20.1568	OK	14.2948	11.2362	17.3533	OK	57.2727	48.197	66.3484	OK
2810429I04Rik	-	-	2810429I04Rik	2810429I04Rik	TSS1577	chr13:3477548-3491644	-	-	0.0154437	0	0.0570685	OK	0.0796948	0	0.169062	OK	0.214331	0.0309837	0.397678	OK
2810432D09Rik	-	-	2810432D09Rik	2810432D09Rik	TSS12986	chr4:41659064-41660549	-	-	8.9093	6.87518	10.9434	OK	5.97341	4.4519	7.49492	OK	12.2629	9.81066	14.7152	OK
2810432L12Rik	-	-	2810432L12Rik	2810432L12Rik	TSS23870	chr4:49597377-49610742	-	-	5.68555	4.7068	6.6643	OK	4.15205	3.41314	4.89095	OK	11.3234	9.55338	13.0934	OK
2810433D01Rik	-	-	2810433D01Rik	2810433D01Rik	TSS10472	chr11:102480820-102485730	-	-	0	0	0	OK	0.00429293	0	0.0160871	OK	0.0230002	0	0.0513317	OK
2810442I21Rik	-	-	2810442I21Rik	2810442I21Rik	TSS14633	chr11:16836725-16851096	-	-	0.22137	0.114897	0.327844	OK	0.266539	0.158811	0.374267	OK	0.181099	0.0979219	0.264276	OK
2810453I06Rik	-	-	2810453I06Rik	2810453I06Rik	TSS5082	chr5:144309573-144325393	-	-	9.00595	7.39391	10.618	OK	5.16014	4.08372	6.23656	OK	9.1919	7.51518	10.8686	OK
2810454H06Rik	-	-	2810454H06Rik	2810454H06Rik	TSS21038	chr6:134847978-134850803	-	-	0.681283	0.44116	0.921406	OK	0.920803	0.653139	1.18847	OK	0.33903	0.200329	0.477731	OK
2810459M11Rik	-	-	2810459M11Rik	2810459M11Rik	TSS15978	chr1:87942437-87952031	-	-	0.0064206	0	0.0257434	OK	0.0481373	0.0125352	0.0837393	OK	0	0	0	OK
2810474O19Rik	-	-	2810474O19Rik	2810474O19Rik	TSS14646	chr6:149257935-149284185	-	-	4.74552	3.99287	5.49817	OK	4.32987	3.65286	5.00689	OK	3.29938	2.77684	3.82192	OK
2900002K06Rik	-	-	2900002K06Rik	2900002K06Rik	TSS10152	chrX:7716100-7725089	-	-	0.726313	0.0133514	1.43927	OK	0.601595	0	1.26237	OK	0.980618	0	2.57417	OK
2900005J15Rik	-	-	2900005J15Rik	2900005J15Rik	TSS9147	chr5:24606792-24608825	-	-	3.72565	2.90178	4.54951	OK	4.59008	3.69047	5.48969	OK	1.69848	1.23536	2.16161	OK
2900006K08Rik	-	-	2900006K08Rik	2900006K08Rik	TSS19926	chr12:85750017-85791900	-	-	0.485578	0.0256575	0.945498	OK	0.409295	0	0.828066	OK	0.316416	0.0658449	0.566988	OK
2900010J23Rik	-	-	2900010J23Rik	2900010J23Rik	TSS3585	chr2:32134335-32143588	-	-	63.5273	53.5953	73.4593	OK	41.9804	35.384	48.5769	OK	144.479	119.463	169.495	OK
2900010M23Rik	-	-	2900010M23Rik	2900010M23Rik	TSS16670	chr17:27259609-27270836	-	-	54.9119	45.7186	64.1053	OK	41.6415	34.4914	48.7916	OK	94.9964	80.0977	109.895	OK
2900011O08Rik	-	-	2900011O08Rik	2900011O08Rik	TSS14433	chr16:13986729-14101587	-	-	0.0184021	0	0.0410321	OK	0.115783	0.0482831	0.183283	OK	0	0	0	OK
2900026A02Rik	-	-	2900026A02Rik	2900026A02Rik	TSS22642	chr5:113515342-113592333	-	-	8.46919	7.13146	9.80691	OK	10.8299	9.05784	12.6019	OK	12.3726	10.285	14.4603	OK
2900041M22Rik	-	-	2900041M22Rik	2900041M22Rik	TSS7056	chr11:117472560-117474731	-	-	0.00845496	0	0.0273212	OK	0.0503274	0.00176499	0.0988898	OK	0	0	0	OK
2900052N01Rik	-	-	2900052N01Rik	2900052N01Rik	TSS10503	chr9:46721685-46735449	-	-	0.0220149	0	0.0453281	OK	0.0611361	0.019963	0.102309	OK	0	0	0	OK
2900053A13Rik	-	-	2900053A13Rik	2900053A13Rik	TSS13975	chr8:3621550-3625545	-	-	4.46213	3.32163	5.60264	OK	2.2341	1.5574	2.91079	OK	3.3947	2.5024	4.287	OK
2900060B14Rik	-	-	2900060B14Rik	2900060B14Rik	TSS21217	chr1:120285634-120506039	-	-	0.772115	0	2.1307	OK	0.342405	0	1.27176	OK	0.151455	0	1.04414	OK
2900062L11Rik	-	-	2900062L11Rik	2900062L11Rik	TSS379	chrX:132528358-132529898	-	-	19.9303	16.7649	23.0958	OK	13.3111	11.167	15.4552	OK	15.5692	13.0936	18.0447	OK
2900064A13Rik	-	-	2900064A13Rik	2900064A13Rik	TSS12479	chr2:112295181-112307593	-	-	52.9189	44.6058	61.232	OK	33.2969	28.0886	38.5052	OK	95.2165	78.729	111.704	OK
2900073G15Rik	-	-	2900073G15Rik	2900073G15Rik	TSS5690	chr17:71343132-71351873	-	-	15.5254	13.037	18.0139	OK	12.5903	10.573	14.6077	OK	19.1882	16.185	22.1913	OK
2900079G21Rik	-	-	2900079G21Rik	2900079G21Rik	TSS11100,TSS1432,TSS7872	chr9:111967594-112251429	-	-	0.00450625	0	0.0295386	OK	0	0	0	OK	0.545675	0.0329225	1.05843	OK
2900092C05Rik	-	-	2900092C05Rik	2900092C05Rik	TSS18028	chr7:13097899-13141670	-	-	0	0	0	OK	0	0	0	OK	0	0	0	OK
2900092D14Rik	-	-	2900092D14Rik	2900092D14Rik	TSS10483	chr1:42757180-42760021	-	-	0	0	0	OK	0	0	0	OK	0	0	0	OK
2900092E17Rik	-	-	2900092E17Rik	2900092E17Rik	TSS657	chr7:134158564-134160866	-	-	11.4495	9.42901	13.4699	OK	8.60234	7.00816	10.1965	OK	23.9702	20.1963	27.744	OK
2900097C17Rik	-	-	2900097C17Rik	2900097C17Rik	TSS4391	chr2:156213798-156218715	-	-	59.945	45.5402	74.3498	OK	45.2448	34.5832	55.9065	OK	49.9047	37.6063	62.203	OK
3000002C10Rik	-	-	3000002C10Rik	3000002C10Rik	TSS6782	chr9:109732667-109733945	-	-	4.04216	3.02257	5.06175	OK	3.60779	2.72009	4.49549	OK	4.14923	3.19476	5.10369	OK
3010026O09Rik	-	-	3010026O09Rik	3010026O09Rik	TSS1038	chr11:49988352-50013617	-	-	1.87138	1.22815	2.5146	OK	1.21071	0.759695	1.66173	OK	7.74862	6.24053	9.25672	OK
3110001D03Rik	-	-	3110001D03Rik	3110001D03Rik	TSS9572	chr4:74923257-74924190	-	-	12.1036	9.4109	14.7962	OK	8.33723	6.31561	10.3588	OK	14.8647	11.8553	17.8741	OK
3110001I22Rik	-	-	3110001I22Rik	3110001I22Rik	TSS5255	chr16:13671950-13703705	-	-	0.820289	0.190068	1.45051	OK	0.549872	0.13985	0.959894	OK	0.892018	0.262244	1.52179	OK
3110002H16Rik	-	-	3110002H16Rik	3110002H16Rik	TSS13086	chr18:12327238-12394895	-	-	7.54322	5.44095	9.64548	OK	5.77483	3.9524	7.59726	OK	18.3467	13.036	23.6573	OK
3110003A17Rik	-	-	3110003A17Rik	3110003A17Rik	TSS4845	chr10:17731066-17743058	-	-	34.9659	29.2878	40.644	OK	19.6168	16.2696	22.964	OK	27.435	22.9489	31.9212	OK
3110007F17Rik	-	-	3110007F17Rik	3110007F17Rik	TSS19307	chrX:120217167-120256902	-	-	0.589765	0.27341	0.906119	OK	0.700174	0.373325	1.02702	OK	1.71444	1.11168	2.31719	OK
3110009E18Rik	-	-	3110009E18Rik	3110009E18Rik	TSS13275	chr1:122017763-122084766	-	-	1.90871	0.921859	2.89557	OK	1.22794	0.547277	1.90861	OK	1.75778	0.835967	2.6796	OK
3110021A11Rik	-	-	3110021A11Rik	3110021A11Rik	TSS6205	chr6:119798210-119799034	-	-	0.121325	0.00707014	0.23558	OK	0.284817	0.087371	0.482264	OK	0.653823	0.291873	1.01577	OK
3110035E14Rik	-	-	3110035E14Rik	3110035E14Rik	TSS21637	chr1:9538126-9621173	-	-	0	0	0	OK	0.00629333	0	0.0230876	OK	0	0	0	OK
3110039M20Rik	-	-	3110039M20Rik	3110039M20Rik	TSS21422	chr12:50490638-50508333	-	-	0	0	0	OK	0	0	0	OK	0	0	0	OK
3110040N11Rik	-	-	3110040N11Rik	3110040N11Rik	TSS7307	chr7:88927072-88934339	-	-	5.85187	4.27943	7.42431	OK	4.50149	3.24985	5.75312	OK	9.92871	7.78461	12.0728	OK
3110043O21Rik	-	-	3110043O21Rik	3110043O21Rik	TSS17822	chr4:35138530-35173129	-	-	4.99061	4.12006	5.86116	OK	4.19777	3.4818	4.91375	OK	5.0874	4.25406	5.92075	OK
3110047P20Rik	-	-	3110047P20Rik	3110047P20Rik	TSS11786	chr5:64040341-64201782	-	-	0.00569851	0	0.0122684	OK	0.117716	0.0716943	0.163738	OK	0.00623965	0.000152329	0.012327	OK
3110048L19Rik	-	-	3110048L19Rik	3110048L19Rik	TSS1930	chr17:22063929-22099431	-	-	0.290568	0.221889	0.359247	OK	0.364727	0.291287	0.438167	OK	0.0996136	0.071318	0.127909	OK
3110049J23Rik	-	-	3110049J23Rik	3110049J23Rik	TSS14749	chr10:62487259-62521560	-	-	1.84221	1.3363	2.34813	OK	1.84925	1.37723	2.32127	OK	1.06392	0.7352	1.39264	OK
3110052M02Rik	-	-	3110052M02Rik	3110052M02Rik	TSS17436	chr17:21787577-21801933	-	-	4.05609	3.36948	4.74269	OK	2.89718	2.41	3.38435	OK	0.912716	0.695058	1.13037	OK
3110056O03Rik	-	-	3110056O03Rik	3110056O03Rik	TSS16103	chr10:80318019-80331453	-	-	5.53918	4.5762	6.50217	OK	5.06407	4.18518	5.94296	OK	4.87728	4.03877	5.7158	OK
3110057O12Rik	-	-	3110057O12Rik	3110057O12Rik	TSS21155	chr3:40698198-40740229	-	-	3.41706	2.68908	4.14504	OK	2.71179	2.14253	3.28106	OK	1.17436	0.845063	1.50366	OK
3110062M04Rik	-	-	3110062M04Rik	3110062M04Rik	TSS19253	chr6:34813145-34828065	-	-	1.04006	0.683417	1.39671	OK	1.01529	0.714852	1.31573	OK	0.774748	0.536264	1.01323	OK
3110070M22Rik	-	-	3110070M22Rik	3110070M22Rik	TSS2870	chr13:120276063-120284312	-	-	1.29884	0.649646	1.94802	OK	0.876155	0.36751	1.3848	OK	0.957517	0.385439	1.52959	OK
3110079O15Rik	-	-	3110079O15Rik	3110079O15Rik	TSS4043	chr1:89366838-89372034	-	-	0	0	0	OK	0	0	0	OK	0	0	0	OK
3110082D06Rik	-	-	3110082D06Rik	3110082D06Rik	TSS21703	chr17:42452895-42644690	-	-	0	0	0	OK	0.00772394	0.000270879	0.015177	OK	0.379901	0.272805	0.486997	OK
3110082I17Rik	-	-	3110082I17Rik	3110082I17Rik	TSS19357	chr5:139835692-139936488	-	-	4.25994	3.10137	5.41851	OK	3.44436	2.32879	4.55993	OK	23.474	19.6542	27.2938	OK
3110099E03Rik	-	-	3110099E03Rik	3110099E03Rik	TSS4982	chr2:115319248-115337937	-	-	0.00177468	0	0.00768959	OK	0.00738471	0	0.0175289	OK	0	0	0	OK
3200002M19Rik	-	-	3200002M19Rik	3200002M19Rik	TSS11498	chr7:109044928-109048057	-	-	1.81432	1.09769	2.53094	OK	1.04371	0.586056	1.50136	OK	9.87074	7.84352	11.898	OK
3230401D17Rik	-	-	3230401D17Rik	3230401D17Rik	TSS5976	chr2:163231557-163245206	-	-	14.8868	12.4582	17.3154	OK	8.18107	6.75995	9.60219	OK	10.5112	8.77922	12.2432	OK
3300002I08Rik	-	-	3300002I08Rik	3300002I08Rik	TSS20324	chr2:150136672-150188501	-	-	0.897523	0.410472	1.38457	OK	0.950269	0.471752	1.42879	OK	0.120583	0.00294381	0.238223	OK
3425401B19Rik	-	-	3425401B19Rik	3425401B19Rik	TSS16487	chr14:33472304-33498458	-	-	0.331533	0.215674	0.447392	OK	0.600404	0.443919	0.75689	OK	0.00455413	0	0.0101639	OK
3632451O06Rik	-	-	3632451O06Rik	3632451O06Rik	TSS12389	chr14:50301693-50403042	-	-	0.0379541	0.00524041	0.0706679	OK	0.150587	0.0734236	0.227751	OK	0	0	0	OK
3830403N18Rik	-	-	3830403N18Rik	3830403N18Rik	TSS14918	chrX:53389748-53406673	-	-	0.0384386	0	0.0897529	OK	0.0196801	0	0.0467142	OK	0	0	0	OK
3830406C13Rik	-	-	3830406C13Rik	3830406C13Rik	TSS22618	chr14:13116722-13135745	-	-	6.46719	5.15416	7.78022	OK	5.37417	4.43284	6.3155	OK	1.91155	1.4626	2.36049	OK
3830408C21Rik	-	-	3830408C21Rik	3830408C21Rik	TSS2955	chr13:107812649-107823598	-	-	0.47515	0.262684	0.687616	OK	0.529297	0.317571	0.741024	OK	0.247034	0.121887	0.372181	OK
3830417A13Rik	-	-	3830417A13Rik	3830417A13Rik	TSS4249	chrX:61426722-61431953	-	-	0	0	0	OK	0	0	0	OK	0	0	0	OK
3830431G21Rik	-	-	3830431G21Rik	3830431G21Rik	TSS12440	chr12:81793587-81825203	-	-	0.0183613	0	0.0369364	OK	0.0678547	0.025391	0.110318	OK	0.496253	0.329496	0.66301	OK
3930402G23Rik	-	-	3930402G23Rik	3930402G23Rik	TSS21472	chr8:10924426-10928457	-	-	0.23035	0.11778	0.34292	OK	0.185696	0.0953378	0.276053	OK	0.0608631	0.0190522	0.102674	OK
4430402I18Rik	-	-	4430402I18Rik	4430402I18Rik	TSS11821	chr19:28997553-29041291	-	-	0.577533	0	1.17044	OK	0.466833	0.0147341	0.918932	OK	0.0176579	0	0.0716868	OK
4632411B12Rik	-	-	4632411B12Rik	4632411B12Rik	TSS17459	chr1:36392574-36426026	-	-	11.9867	10.0854	13.8881	OK	9.33721	7.86559	10.8088	OK	9.19303	7.73906	10.647	OK
4632415K11Rik	-	-	4632415K11Rik	4632415K11Rik	TSS21718	chr8:122284486-122302316	-	-	4.19373	3.3832	5.00426	OK	3.19296	2.55319	3.83273	OK	2.28866	1.78346	2.79385	OK
4632415L05Rik	-	-	4632415L05Rik	4632415L05Rik	TSS21071	chr3:19794870-19798984	-	-	3.64118	2.99758	4.28477	OK	2.654	2.17851	3.12949	OK	1.6344	1.29211	1.97668	OK
4632427E13Rik	-	-	4632427E13Rik	4632427E13Rik	TSS8630	chr7:99889215-99889969	-	-	1.06963	0.525633	1.61362	OK	1.52563	0.853597	2.19766	OK	0.532337	0.198101	0.866572	OK
4632428C04Rik	-	-	4632428C04Rik	4632428C04Rik	TSS8806	chr16:30008752-30021516	-	-	3.26844	2.56673	3.97015	OK	2.76907	2.17746	3.36068	OK	0.466953	0.287304	0.646603	OK
4632428N05Rik	-	-	4632428N05Rik	4632428N05Rik	TSS7522	chr10:59766021-60159238	-	-	0.0639512	0.0206001	0.107302	OK	0.597545	0.431442	0.763649	OK	0.0121435	0	0.0700844	OK
4632434I11Rik	-	-	4632434I11Rik	4632434I11Rik	TSS10243	chr7:100006036-100022742	-	-	0.170166	0.0846608	0.255672	OK	0.128574	0.0658114	0.191337	OK	1.3429	1.03761	1.64818	OK
4732415M23Rik	-	-	4732415M23Rik	4732415M23Rik	TSS23019	chr8:125736757-125745945	-	-	0.612714	0.205214	1.02021	OK	0.387042	0.106835	0.667249	OK	0.259462	0.0375078	0.481416	OK
4732416N19Rik	-	-	4732416N19Rik	4732416N19Rik	TSS16281	chr6:147995937-148392874	-	-	0.288929	0	5.68694	OK	0.0343223	0	0.564022	OK	0	0	0	OK
4732418C07Rik	-	-	4732418C07Rik	4732418C07Rik	TSS23322	chr4:115410677-115449932	-	-	20.0898	16.6997	23.48	OK	17.6266	14.6065	20.6468	OK	10.1983	8.57741	11.8192	OK
4732456N10Rik	-	-	4732456N10Rik	4732456N10Rik	TSS18932	chr15:101346118-101524736	-	-	0.0773179	0.0107668	0.143869	OK	0.0598661	0.0077282	0.112004	OK	0	0	0	OK
4732471D19Rik	-	-	4732471D19Rik	4732471D19Rik	TSS23943	chr13:54605165-54666743	-	-	4.58592	1.51115	7.6607	OK	3.61556	1.4415	5.78962	OK	4.11237	0.801294	7.42344	OK
4732471J01Rik	-	-	4732471J01Rik	4732471J01Rik	TSS21358	chr7:26164545-26351436	-	-	0.113351	0	0.316419	OK	0.222714	0	0.517253	OK	0.213992	0	0.607993	OK
4831426I19Rik	-	-	4831426I19Rik	4831426I19Rik	TSS18018,TSS21137	chr12:106168158-106248019	-	-	0.647291	0.434619	0.859962	OK	0.884073	0.665165	1.10298	OK	0.552563	0.371788	0.733337	OK
4831440E17Rik	-	-	4831440E17Rik	4831440E17Rik	TSS21254	chr5:25005614-25010291	-	-	0.803281	0.578765	1.0278	OK	1.1726	0.920584	1.42461	OK	0.447613	0.310461	0.584764	OK
4832428D23Rik	-	-	4832428D23Rik	4832428D23Rik	TSS11364	chr1:44260914-44275776	-	-	0	0	0	OK	0	0	0	OK	0	0	0	OK
4833403I15Rik	-	-	4833403I15Rik	4833403I15Rik	TSS23348	chr18:47009692-47065100	-	-	0.0999799	0.0381363	0.161823	OK	0.103476	0.0453854	0.161566	OK	0.0180957	0.000441772	0.0357497	OK
4833413D08Rik	-	-	4833413D08Rik	4833413D08Rik	TSS11417	chr2:154083614-154096979	-	-	0.00478467	0	0.0159414	OK	0.0155088	0	0.0338295	OK	0	0	0	OK
4833418N02Rik	-	-	4833418N02Rik	4833418N02Rik	TSS18993	chr17:87674225-87682154	-	-	1.14144	0.720913	1.56196	OK	0.975454	0.620099	1.33081	OK	0.350638	0.173006	0.528271	OK
4833420G17Rik	-	-	4833420G17Rik	4833420G17Rik	TSS17317	chr13:120251565-120274924	-	-	9.89068	8.29092	11.4904	OK	9.64227	8.10628	11.1783	OK	8.22325	6.91664	9.52987	OK
4833422C13Rik	-	-	4833422C13Rik	4833422C13Rik	TSS4784	chr13:91600701-91925753	-	-	0.243074	0	0.52983	OK	0.403997	0.100197	0.707796	OK	0	0	0	OK
4833422F24Rik	-	-	4833422F24Rik	4833422F24Rik	TSS22499	chr2:165220949-165225894	-	-	0.00748531	0	0.0218165	OK	0.0166664	0	0.0376406	OK	0	0	0	OK
4833423E24Rik	-	-	4833423E24Rik	4833423E24Rik	TSS579	chr2:85324248-85359092	-	-	0	0	0	OK	0	0	0	OK	0	0	0	OK
4833424O15Rik	-	-	4833424O15Rik	4833424O15Rik	TSS6666	chr3:117278378-117392424	-	-	0.437223	0.280205	0.594241	OK	0.181012	0.104476	0.257549	OK	0	0	0	OK
4833427G06Rik	-	-	4833427G06Rik	4833427G06Rik	TSS13804	chr9:50889417-50910183	-	-	0.375918	0.129031	0.622805	OK	0.219943	0.0625209	0.377365	OK	0	0	0	OK
4833439L19Rik	-	-	4833439L19Rik	4833439L19Rik	TSS7665	chr13:54605165-54666743	-	-	74.1788	57.2551	91.1025	OK	52.2513	40.7328	63.7698	OK	78.603	58.1888	99.0172	OK
4833442J19Rik	-	-	4833442J19Rik	4833442J19Rik	TSS20689	chr6:149090118-149099692	-	-	1.76065	1.18821	2.33309	OK	1.39449	0.948604	1.84037	OK	0.121772	0.0381186	0.205425	OK
4921501E09Rik	-	-	4921501E09Rik	4921501E09Rik	TSS9340	chr17:33201087-33205003	-	-	0	0	0	OK	0	0	0	OK	0	0	0	OK
4921504E06Rik	-	-	4921504E06Rik	4921504E06Rik	TSS11198	chr2:19384463-19475537	-	-	0	0	0	OK	0.00479647	0	0.0141144	OK	0	0	0	OK
4921506M07Rik	-	-	4921506M07Rik	4921506M07Rik	TSS21298	chr12:58665101-58723096	-	-	0.0134728	0	0.0367785	OK	0.0133543	0	0.0345367	OK	0	0	0	OK
4921507P07Rik	-	-	4921507P07Rik	4921507P07Rik	TSS13333	chr6:50516641-50546589	-	-	0.629819	0.38416	0.875477	OK	0.535806	0.336458	0.735154	OK	0.0330588	0.00178261	0.0643349	OK
4921509C19Rik	-	-	4921509C19Rik	4921509C19Rik	TSS13189	chr2:151296277-151301887	-	-	0	0	0	OK	0.000619214	0	0.00356967	OK	0	0	0	OK
4921510H08Rik	-	-	4921510H08Rik	4921510H08Rik	TSS21552	chr10:97106701-97429724	-	-	0.00691129	0	0.0263338	OK	0	0	0	OK	0	0	0	OK
4921511C20Rik	-	-	4921511C20Rik	4921511C20Rik	TSS16890	chrX:123928824-123930430	-	-	0	0	0	OK	0	0	0	OK	0	0	0	OK
4921511H03Rik	-	-	4921511H03Rik	4921511H03Rik	TSS8947	chr5:6769029-7344378	-	-	0.0119484	0	0.0638023	OK	0.0306976	0	0.100315	OK	0	0	0	OK
4921513D23Rik	-	-	4921513D23Rik	4921513D23Rik	TSS3815	chr16:14109258-14159367	-	-	8.84901	7.41395	10.2841	OK	9.07812	7.54288	10.6134	OK	5.18378	4.36466	6.00291	OK
4921515J06Rik	-	-	4921515J06Rik	4921515J06Rik	TSS3659,TSS9341	chr3:108743001-108763694	-	-	0.0642095	0	0.132868	OK	0.0797045	0.0207128	0.138696	OK	0	0	0	OK
4921517D21Rik	-	-	4921517D21Rik	4921517D21Rik	TSS13260	chr9:107830799-107834792	-	-	0	0	0	OK	0	0	0	OK	0	0	0	OK
4921517D22Rik	-	-	4921517D22Rik	4921517D22Rik	TSS24115	chr13:59788762-59795462	-	-	0	0	0	OK	0	0	0	OK	0	0	0	OK
4921517L17Rik	-	-	4921517L17Rik	4921517L17Rik	TSS21877	chr2:156137581-156201374	-	-	0.822427	0.301071	1.34378	OK	0.717062	0.312327	1.1218	OK	0.463851	0.154942	0.77276	OK
4921521F21Rik	-	-	4921521F21Rik	4921521F21Rik	TSS1477	chr1:65059659-65079322	-	-	0	0	0	OK	0	0	0	OK	0	0	0	OK
4921523A10Rik	-	-	4921523A10Rik	4921523A10Rik	TSS22289	chr17:53618558-53678776	-	-	0.19171	0	0.69025	OK	0.131087	0	0.440515	OK	0.0964415	0	0.366605	OK
4921524J17Rik	-	-	4921524J17Rik	4921524J17Rik	TSS19402	chr8:87932657-87956740	-	-	3.69607	2.76174	4.63041	OK	2.69341	2.02652	3.3603	OK	2.1696	1.48401	2.8552	OK
4921524L21Rik	-	-	4921524L21Rik	4921524L21Rik	TSS5431	chr18:6603630-6638964	-	-	0	0	0	OK	0	0	0	OK	0	0	0	OK
4921528I01Rik	-	-	4921528I01Rik	4921528I01Rik	TSS10464	chr18:21969397-22329897	-	-	0.00272426	0	0.00909627	OK	0.00271593	0	0.00799206	OK	0	0	0	OK
4921528O07Rik	-	-	4921528O07Rik	4921528O07Rik	TSS6807	chr1:164954432-165015801	-	-	0	0	0	OK	0	0	0	OK	0	0	0	OK
4921530D09Rik	-	-	4921530D09Rik	4921530D09Rik	TSS3851	chr2:25464148-25473198	-	-	0.0290798	0	0.0614554	OK	0.0284645	0	0.0578081	OK	0.0337826	0.000824735	0.0667404	OK
4921530L21Rik	-	-	4921530L21Rik	4921530L21Rik	TSS5783	chr14:96280484-96281994	-	-	0	0	0	OK	0	0	0	OK	0	0	0	OK
4921531C22Rik	-	-	4921531C22Rik	4921531C22Rik	TSS23475	chr2:179711557-179713718	-	-	2.20814	1.61115	2.80513	OK	1.61001	1.1657	2.05433	OK	1.0353	0.704068	1.36653	OK
4921533I20Rik	-	-	4921533I20Rik	4921533I20Rik	TSS5396	chr18:17392991-17393991	-	-	0.160223	0.0348336	0.285612	OK	0.0654985	0.00406689	0.12693	OK	0.0612041	0.00149418	0.120914	OK
4921536K21Rik	-	-	4921536K21Rik	4921536K21Rik	TSS9444	chr11:3786090-3795129	-	-	0.817594	0.540873	1.09432	OK	0.504404	0.31801	0.690798	OK	0.451096	0.281513	0.620678	OK
4921539E11Rik	-	-	4921539E11Rik	4921539E11Rik	TSS16131	chr4:102903050-102963468	-	-	0	0	0	OK	0	0	0	OK	0	0	0	OK
4922501C03Rik	-	-	4922501C03Rik	4922501C03Rik	TSS16178	chr9:87086797-87150367	-	-	3.98134	3.32965	4.63302	OK	3.57293	3.00442	4.14144	OK	2.4374	2.02594	2.84886	OK
4922501L14Rik	-	-	4922501L14Rik	4922501L14Rik	TSS5889	chr3:154374096-154411976	-	-	4.98377	3.99341	5.97413	OK	4.24323	3.43008	5.05638	OK	1.55466	1.12661	1.98271	OK
4922502D21Rik	-	-	4922502D21Rik	4922502D21Rik	TSS20885	chr6:129272182-129281799	-	-	0	0	0	OK	0	0	0	OK	0	0	0	OK
4922505E12Rik	-	-	4922505E12Rik	4922505E12Rik	TSS7336	chr1:184677256-184679311	-	-	0	0	0	OK	0	0	0	OK	0	0	0	OK
4922505G16Rik	-	-	4922505G16Rik	4922505G16Rik	TSS4204	chr2:157034285-157152054	-	-	0.0953533	0	1.34544	OK	0.0327813	0	0.536023	OK	0.0413049	0	2.65966	OK
4930402F06Rik	-	-	4930402F06Rik	4930402F06Rik	TSS14936	chr2:35231081-35252695	-	-	0	0	0	OK	0	0	0	OK	0	0	0	OK
4930402H24Rik	-	-	4930402H24Rik	4930402H24Rik	TSS17553	chr2:130533588-130665846	-	-	17.7071	14.6833	20.7308	OK	19.5545	16.0056	23.1035	OK	7.61907	6.41052	8.82761	OK
4930403L05Rik	-	-	4930403L05Rik	4930403L05Rik	TSS2052	chrX:14687711-14688615	-	-	0	0	0	OK	0	0	0	OK	0	0	0	OK
4930403N07Rik	-	-	4930403N07Rik	4930403N07Rik	TSS19613	chr12:73202278-73286016	-	-	0.173211	0.0776013	0.268821	OK	0.0329286	0.00628787	0.0595693	OK	0.0101795	0	0.0227185	OK
4930404A10Rik	-	-	4930404A10Rik	4930404A10Rik	TSS11796	chr11:54184153-54240257	-	-	0.0221174	0	0.0523765	OK	0.0188275	0	0.0425215	OK	0	0	0	OK
4930404H21Rik	-	-	4930404H21Rik	4930404H21Rik	TSS16594	chr7:140778706-140793798	-	-	0	0	0	OK	0	0	0	OK	0	0	0	OK
4930404I05Rik	-	-	4930404I05Rik	4930404I05Rik	TSS18539	chr16:90936341-91044624	-	-	0.38606	0	1.47446	OK	0.420757	0	1.67106	OK	0.219731	0	1.10199	OK
4930404N11Rik	-	-	4930404N11Rik	4930404N11Rik	TSS626	chr10:80820314-80828565	-	-	0.666583	0.0799668	1.2532	OK	0.742968	0.114395	1.37154	OK	1.91435	0.703789	3.12491	OK
4930407I10Rik	-	-	4930407I10Rik	4930407I10Rik	TSS1112	chr15:81889580-81896968	-	-	0.000976547	0	0.00423133	OK	0	0	0	OK	0	0	0	OK
4930408F14Rik	-	-	4930408F14Rik	4930408F14Rik	TSS18688,TSS21120,TSS706	chrX:3546313-3547091	-	-	0	0	0	OK	0	0	0	OK	0	0	0	OK
4930412C18Rik	-	-	4930412C18Rik	4930412C18Rik	TSS7884	chr4:9697731-9750558	-	-	0.166613	0.0854065	0.247819	OK	0.163998	0.0909057	0.237091	OK	0.0267208	0.00586477	0.0475768	OK
4930412F15Rik	-	-	4930412F15Rik	4930412F15Rik	TSS6722	chr4:43672493-43681731	-	-	0.188777	0.0741944	0.303359	OK	0.138285	0.0535471	0.223022	OK	0	0	0	OK
4930412O13Rik	-	-	4930412O13Rik	4930412O13Rik	TSS3685	chr2:9802872-9808394	-	-	0	0	0	OK	0	0	0	OK	0	0	0	OK
4930415F15Rik	-	-	4930415F15Rik	4930415F15Rik	TSS18661	chr11:11389268-11415193	-	-	0	0	0	OK	0.00855539	0	0.03206	OK	0	0	0	OK
4930415L06Rik	-	-	4930415L06Rik	4930415L06Rik	TSS21633	chrX:87175435-87178191	-	-	0	0	0	OK	0	0	0	OK	0	0	0	OK
4930417G10Rik	-	-	4930417G10Rik	4930417G10Rik	TSS19460	chr12:4599813-4745189	-	-	0.0704396	0	0.264718	OK	0.118498	0	0.347822	OK	0.00267522	0	0.0271072	OK
4930417O13Rik	-	-	4930417O13Rik	4930417O13Rik	TSS2557	chr6:125215542-125223795	-	-	0.0251496	0	0.061696	OK	0.0704673	0.00437541	0.136559	OK	0.0645955	0.00157697	0.127614	OK
4930420K17Rik	-	-	4930420K17Rik	4930420K17Rik	TSS18403	chr5:9100736-9161776	-	-	10.7278	7.06592	14.3897	OK	7.284	4.60024	9.96775	OK	9.99952	6.84609	13.153	OK
4930422G04Rik	-	-	4930422G04Rik	4930422G04Rik	TSS13267	chr3:127256406-127320941	-	-	0.365536	0.250077	0.480995	OK	0.443675	0.32651	0.56084	OK	1.64491	1.36073	1.9291	OK
4930426L09Rik	-	-	4930426L09Rik	4930426L09Rik	TSS4052	chr2:18919945-18921431	-	-	0.201752	0.0755117	0.327992	OK	0.186066	0.0756505	0.296481	OK	0.152816	0.0568681	0.248764	OK
4930427A07Rik	-	-	4930427A07Rik	4930427A07Rik	TSS22493	chr12:114394631-114403669	-	-	1.14136	0.822691	1.46003	OK	0.659917	0.446883	0.872952	OK	12.2896	10.3631	14.216	OK
4930428D18Rik	-	-	4930428D18Rik	4930428D18Rik	TSS2269	chrX:73638688-73643318	-	-	0	0	0	OK	0	0	0	OK	0	0	0	OK
4930428E23Rik	-	-	4930428E23Rik	4930428E23Rik	TSS18732	chrX:72391395-72409090	-	-	0.0503725	0	0.126028	OK	0.0173096	0	0.0509363	OK	0	0	0	OK
4930429B21Rik	-	-	4930429B21Rik	4930429B21Rik	TSS19012	chr3:32233715-32266360	-	-	0.563322	0	1.17402	OK	0.417479	0	0.950035	OK	0.647891	0	1.56543	OK
4930429F11Rik	-	-	4930429F11Rik	4930429F11Rik	TSS12641	chr17:79874963-79877225	-	-	0	0	0	OK	0	0	0	OK	0	0	0	OK
4930430A15Rik	-	-	4930430A15Rik	4930430A15Rik	TSS23183	chr2:111033410-111069757	-	-	0	0	0	OK	0	0	0	OK	0	0	0	OK
4930430D24Rik	-	-	4930430D24Rik	4930430D24Rik	TSS1138	chrX:35391375-35396291	-	-	0.00426678	0	0.0184878	OK	0	0	0	OK	0	0	0	OK
4930430F08Rik	-	-	4930430F08Rik	4930430F08Rik	TSS20171	chr10:99950922-100051893	-	-	3.97067	2.70378	5.23757	OK	2.73562	1.78628	3.68496	OK	2.07608	1.35707	2.7951	OK
4930431A04Rik	-	-	4930431A04Rik	4930431A04Rik	TSS13092	chr6:128656525-128673064	-	-	0	0	0	OK	0	0	0	OK	0	0	0	OK
4930432K09Rik	-	-	4930432K09Rik	4930432K09Rik	TSS22221	chr5:88254721-88275411	-	-	0	0	0	OK	0	0	0	OK	0	0	0	OK
4930432K21Rik	-	-	4930432K21Rik	4930432K21Rik	TSS6590	chr8:86671936-86696496	-	-	0.0278555	0	0.0574411	OK	0.0349758	0.00290622	0.0670454	OK	0.389587	0.190782	0.588391	OK
4930433I11Rik	-	-	4930433I11Rik	4930433I11Rik	TSS20444	chr7:48242978-48250203	-	-	0	0	0	OK	0	0	0	OK	0	0	0	OK
4930433N12Rik	-	-	4930433N12Rik	4930433N12Rik	TSS20379	chr9:3190268-3199813	-	-	0.0063409	0	0.0222505	OK	0.00407491	0	0.0152701	OK	0	0	0	OK
4930434E21Rik	-	-	4930434E21Rik	4930434E21Rik	TSS3206	chr5:150331253-150414469	-	-	0.0188831	0	0.0402015	OK	0.00457255	0	0.0134555	OK	0	0	0	OK
4930435E12Rik	-	-	4930435E12Rik	4930435E12Rik	TSS11360	chr16:38812317-38828862	-	-	0	0	0	OK	0	0	0	OK	0	0	0	OK
4930441O14Rik	-	-	4930441O14Rik	4930441O14Rik	TSS21203	chr13:67830198-67857775	-	-	0.645152	0.39332	0.896984	OK	0.414875	0.240074	0.589677	OK	0.0456425	0	0.0927974	OK
4930442L01Rik	-	-	4930442L01Rik	4930442L01Rik	TSS6644	chr3:96633748-96674849	-	-	0	0	0	OK	0.00241287	0	0.0205785	OK	0	0	0	OK
4930443G12Rik	-	-	4930443G12Rik	4930443G12Rik	TSS3121	chr3:108883416-108919500	-	-	0	0	0	OK	0.00728314	0	0.0214318	OK	0	0	0	OK
4930444A02Rik	-	-	4930444A02Rik	4930444A02Rik	TSS4748	chr8:27091075-27104593	-	-	3.74014	3.06557	4.41471	OK	2.88424	2.3605	3.40798	OK	1.87455	1.49456	2.25454	OK
4930444G20Rik	-	-	4930444G20Rik	4930444G20Rik	TSS6750	chr10:21786112-21787885	-	-	0.00273383	0	0.0118456	OK	0.00303583	0	0.011163	OK	0	0	0	OK
4930447C04Rik	-	-	4930447C04Rik	4930447C04Rik	TSS21040	chr12:73982095-74018752	-	-	0.0238884	0	0.0520907	OK	0.0115546	0	0.0260958	OK	0	0	0	OK
4930448K20Rik	-	-	4930448K20Rik	4930448K20Rik	TSS1235	chr4:9843111-9844544	-	-	0	0	0	OK	0	0	0	OK	0	0	0	OK
4930449I24Rik	-	-	4930449I24Rik	4930449I24Rik	TSS23937	chr5:147313974-147316759	-	-	0	0	0	OK	0	0	0	OK	0	0	0	OK
4930451C15Rik	-	-	4930451C15Rik	4930451C15Rik	TSS8376	chr16:17544557-17561340	-	-	0.0554097	0.00551264	0.105307	OK	0.0934393	0.0320558	0.154823	OK	0	0	0	OK
4930451I11Rik	-	-	4930451I11Rik	4930451I11Rik	TSS17384	chr7:133973987-133975010	-	-	0.0140496	0	0.0608764	OK	0	0	0	OK	0	0	0	OK
4930452B06Rik	-	-	4930452B06Rik	4930452B06Rik	TSS3322	chr14:9263685-9498804	-	-	0.267653	0.140717	0.394589	OK	0.320701	0.188725	0.452677	OK	2.81245	2.25657	3.36832	OK
4930453N24Rik	-	-	4930453N24Rik	4930453N24Rik	TSS845	chr16:64765930-64770765	-	-	8.62696	6.95358	10.3003	OK	6.71582	5.4305	8.00115	OK	8.06138	6.57542	9.54733	OK
4930455C21Rik	-	-	4930455C21Rik	4930455C21Rik	TSS6956	chr16:38497924-38522747	-	-	4.92343	3.93844	5.90842	OK	4.16587	3.34479	4.98696	OK	6.55511	5.40299	7.70723	OK
4930455F23Rik	-	-	4930455F23Rik	4930455F23Rik	TSS5033	chr1:166205728-166217978	-	-	8.12298	6.6957	9.55026	OK	5.82929	4.79687	6.86171	OK	3.85442	3.06701	4.64184	OK
4930458L03Rik	-	-	4930458L03Rik	4930458L03Rik	TSS16146	chr13:65018713-65024503	-	-	0	0	0	OK	0	0	0	OK	0	0	0	OK
4930465K10Rik	-	-	4930465K10Rik	4930465K10Rik	TSS19535	chr18:77952922-77954184	-	-	0.0342619	0	0.0813838	OK	0.0148004	0	0.0382764	OK	0	0	0	OK
4930467E23Rik	-	-	4930467E23Rik	4930467E23Rik	TSS22793	chr8:19729575-19753602	-	-	0.318536	0.173733	0.463338	OK	0.484535	0.31158	0.657491	OK	0	0	0	OK
4930469G21Rik	-	-	4930469G21Rik	4930469G21Rik	TSS16590	chr1:163072842-163100638	-	-	0.0103907	0	0.0588916	OK	0.0348389	0	0.119709	OK	0	0	0	OK
4930470P17Rik	-	-	4930470P17Rik	4930470P17Rik	TSS20038	chr2:170404917-170427517	-	-	0.230753	0.0883475	0.373159	OK	0.316116	0.151618	0.480614	OK	0	0	0	OK
4930471G03Rik	-	-	4930471G03Rik	4930471G03Rik	TSS4988	chr18:36177311-36356814	-	-	0	0	0	OK	0	0	0	OK	0	0	0	OK
4930471M23Rik	-	-	4930471M23Rik	4930471M23Rik	TSS12430	chr5:30950311-30962102	-	-	5.09063	4.20568	5.97559	OK	4.11257	3.39517	4.82997	OK	9.96862	8.41039	11.5269	OK
4930473A06Rik	-	-	4930473A06Rik	4930473A06Rik	TSS1718	chr4:83171448-83510574	-	-	0.479193	0.318908	0.639478	OK	0.531702	0.374601	0.688804	OK	0.018649	0.0026959	0.0346021	OK
4930474M22Rik	-	-	4930474M22Rik	4930474M22Rik	TSS12819	chr17:14416512-14541797	-	-	0	0	0	OK	0	0	0	OK	0	0	0	OK
4930474N05Rik	-	-	4930474N05Rik	4930474N05Rik	TSS17989	chr14:36908150-36910041	-	-	0	0	0	OK	0	0	0	OK	0	0	0	OK
4930479M11Rik	-	-	4930479M11Rik	4930479M11Rik	TSS17538	chr7:31455740-31456624	-	-	0.0163796	0	0.0670608	OK	0	0	0	OK	0	0	0	OK
4930480E11Rik	-	-	4930480E11Rik	4930480E11Rik	TSS19127	chrX:75614981-75616278	-	-	0	0	0	OK	0	0	0	OK	0	0	0	OK
4930481A15Rik	-	-	4930481A15Rik	4930481A15Rik	TSS21411	chr19:5406873-5424916	-	-	7.75464	3.74311	11.7662	OK	5.14995	2.48618	7.81372	OK	2.68369	0	5.74457	OK
4930483J18Rik	-	-	4930483J18Rik	4930483J18Rik	TSS17952	chr15:81021282-81023187	-	-	0.0667607	0.0001785	0.133343	OK	0.0671423	0.00578514	0.128499	OK	0.0273338	0	0.0610033	OK
4930486L24Rik	-	-	4930486L24Rik	4930486L24Rik	TSS350	chr13:60943972-60965777	-	-	0	0	0	OK	0.0203791	0	0.0460257	OK	0	0	0	OK
4930488L21Rik	-	-	4930488L21Rik	4930488L21Rik	TSS18751	chr8:96334737-96493288	-	-	0.720344	0	5.46083	OK	1.2374	0	7.21588	OK	0.113128	0	2.08768	OK
4930502E18Rik	-	-	4930502E18Rik	4930502E18Rik	TSS394	chrX:51028007-51041399	-	-	0.02746	0	0.0662733	OK	0.0326385	0	0.0692385	OK	0.338581	0.159854	0.517308	OK
4930503B20Rik	-	-	4930503B20Rik	4930503B20Rik	TSS13938	chr3:146309222-146314281	-	-	0.122445	0.0187745	0.226115	OK	0.233576	0.0884485	0.378704	OK	0.173699	0.0543737	0.293025	OK
4930503E14Rik	-	-	4930503E14Rik	4930503E14Rik	TSS7315	chr14:44740831-44749036	-	-	0	0	0	OK	0.0121292	0	0.0313682	OK	0	0	0	OK
4930503E24Rik	-	-	4930503E24Rik	4930503E24Rik	TSS3966	chr10:123906129-123961544	-	-	2.14631	1.47424	2.81839	OK	0.713988	0.422838	1.00514	OK	2.13174	1.53079	2.7327	OK
4930503H13Rik	-	-	4930503H13Rik	4930503H13Rik	TSS13053	chrX:152974025-152974660	-	-	0	0	0	OK	0	0	0	OK	0	0	0	OK
4930503L19Rik	-	-	4930503L19Rik	4930503L19Rik	TSS19986	chr18:70612793-70632134	-	-	1.9304	1.41617	2.44464	OK	2.35836	1.83482	2.8819	OK	6.27145	5.20978	7.33312	OK
4930504O13Rik	-	-	4930504O13Rik	4930504O13Rik	TSS21192	chr11:58259644-58266468	-	-	0	0	0	OK	0	0	0	OK	0	0	0	OK
4930505A04Rik	-	-	4930505A04Rik	4930505A04Rik	TSS3442	chr11:30326005-30371829	-	-	0.942691	0.510644	1.37474	OK	0.646534	0.347193	0.945874	OK	0.0311304	0	0.0694764	OK
4930506M07Rik	-	-	4930506M07Rik	4930506M07Rik	TSS19118	chr19:59047847-59150559	-	-	5.50215	4.60543	6.39888	OK	4.87103	4.08765	5.6544	OK	0	0	0	OK
4930507D05Rik	-	-	4930507D05Rik	4930507D05Rik	TSS20255	chr10:61892125-61914101	-	-	0.171216	0	0.3745	OK	0.185867	0.00313305	0.368601	OK	0.261875	0	0.562982	OK
4930511I11Rik	-	-	4930511I11Rik	4930511I11Rik	TSS14306	chr17:28667805-28675920	-	-	0.00353011	0	0.0169858	OK	0.00575207	0	0.021555	OK	0	0	0	OK
4930511M06Rik	-	-	4930511M06Rik	4930511M06Rik	TSS12755,TSS15787,TSS6821	chr18:57693479-57890719	-	-	0	0	0	OK	0.0178752	0	0.0498403	OK	0.189384	0.100895	0.277872	OK
4930511M11Rik	-	-	4930511M11Rik	4930511M11Rik	TSS16615	chr5:3657003-3679544	-	-	0	0	0	OK	0.00397736	0	0.023473	OK	0	0	0	OK
4930512B01Rik	-	-	4930512B01Rik	4930512B01Rik	TSS138	chr12:70847834-71087989	-	-	0.142682	0	0.633919	OK	0.156061	0	0.647024	OK	0.0417813	0	0.239738	OK
4930513N10Rik	-	-	4930513N10Rik	4930513N10Rik	TSS13897	chr8:98243350-98345628	-	-	0.456459	0	1.58388	OK	0.489176	0	1.68081	OK	0.630478	0	1.87801	OK
4930515G01Rik	-	-	4930515G01Rik	4930515G01Rik	TSS24022	chr5:115223741-115224992	-	-	0.919427	0.531858	1.307	OK	0.801739	0.466099	1.13738	OK	0.738783	0.416498	1.06107	OK
4930515G16Rik	-	-	4930515G16Rik	4930515G16Rik	TSS12497	chr6:67515227-67515693	-	-	0	0	0	OK	0	0	0	OK	0	0	0	OK
4930519F09Rik	-	-	4930519F09Rik	4930519F09Rik	TSS7073	chr10:28641768-28643313	-	-	0.277358	0.117157	0.437559	OK	0.102929	0.0292586	0.1766	OK	0.118864	0.0372084	0.200519	OK
4930519F16Rik	-	-	4930519F16Rik	4930519F16Rik	TSS4511	chrX:100427619-100451945	-	-	0.00814182	0	0.0270439	OK	0	0	0	OK	0	0	0	OK
4930519G04Rik	-	-	4930519G04Rik	4930519G04Rik	TSS19526	chr5:115303722-115333888	-	-	0	0	0	OK	0	0	0	OK	0	0	0	OK
4930521A18Rik	-	-	4930521A18Rik	4930521A18Rik	TSS1611	chr1:31279683-31281132	-	-	0.00259073	0	0.0124658	OK	0	0	0	OK	0	0	0	OK
4930522H14Rik	-	-	4930522H14Rik	4930522H14Rik	TSS593,TSS8095	chr4:109177936-109203902	-	-	0	0	0	OK	0	0	0	OK	0	0	0	OK
4930523C07Rik	-	-	4930523C07Rik	4930523C07Rik	TSS13959	chr1:161974510-162008717	-	-	0.235482	0.107595	0.363369	OK	0.714613	0.480549	0.948678	OK	0.00623255	0	0.0150773	OK
4930524B15Rik	-	-	4930524B15Rik	4930524B15Rik	TSS17061	chr11:31865632-31879651	-	-	0.00245095	0	0.0106199	OK	0.00547866	0	0.0161218	OK	0	0	0	OK
4930524E20Rik	-	-	4930524E20Rik	4930524E20Rik	TSS3737	chrX:112021190-112022119	-	-	0	0	0	OK	0	0	0	OK	0	0	0	OK
4930524L23Rik	-	-	4930524L23Rik	4930524L23Rik	TSS22098	chrX:7135687-7182546	-	-	0.293735	0.0826862	0.504785	OK	0.258055	0.0833968	0.432714	OK	0.347203	0	0.839924	OK
4930525F21Rik	-	-	4930525F21Rik	4930525F21Rik	TSS20842	chr2:125684953-125971987	-	-	0.0100329	0	0.0818123	OK	0.00921845	0	0.0636114	OK	0	0	0	OK
4930526D03Rik	-	-	4930526D03Rik	4930526D03Rik	TSS2760	chr2:181431499-181433147	-	-	0.00794444	0	0.0344229	OK	0.0202175	0	0.0594932	OK	0	0	0	OK
4930526I15Rik	-	-	4930526I15Rik	4930526I15Rik	TSS18368,TSS19872	chr9_random:46928-56293	-	-	0	0	0	OK	0	0	0	OK	0	0	0	OK
4930528A17Rik	-	-	4930528A17Rik	4930528A17Rik	TSS9828	chr4:21773473-21803622	-	-	0.361682	0	1.08824	OK	0.269467	0	0.807089	OK	0.126881	0	0.374754	OK
4930528F23Rik	-	-	4930528F23Rik	4930528F23Rik	TSS17025	chr17:24941326-24976732	-	-	0.0137532	0	0.0353822	OK	0.0174517	0	0.0380751	OK	0	0	0	OK
4930529C04Rik	-	-	4930529C04Rik	4930529C04Rik	TSS4934	chr3:90875583-90879114	-	-	0.00455319	0	0.0125529	OK	0.00308984	0	0.00893826	OK	0.0231826	0.00369607	0.0426692	OK
4930529F22Rik	-	-	4930529F22Rik	4930529F22Rik	TSS23885	chr8:41878626-41882657	-	-	0.00182594	0	0.00782094	OK	0.00200089	0	0.00749801	OK	0	0	0	OK
4930529M08Rik	-	-	4930529M08Rik	4930529M08Rik	TSS18735	chr2:145760519-145789962	-	-	0.226251	0.0912785	0.361223	OK	0.215281	0.0950306	0.335532	OK	0	0	0	OK
4930534B04Rik	-	-	4930534B04Rik	4930534B04Rik	TSS13797	chr12:92236931-92622849	-	-	0.44224	0.293776	0.590703	OK	0.376765	0.254814	0.498716	OK	1.62255	1.30436	1.94075	OK
4930538K18Rik	-	-	4930538K18Rik	4930538K18Rik	TSS18675	chr4:118877659-118890822	-	-	0.114985	0.028767	0.201202	OK	0.130982	0.0435666	0.218398	OK	0.0757604	0.0166282	0.134893	OK
4930539E08Rik	-	-	4930539E08Rik	4930539E08Rik	TSS23804	chr17:29033339-29052269	-	-	0.254928	0.151992	0.357864	OK	0.5688	0.401699	0.7359	OK	0	0	0	OK
4930539J05Rik	-	-	4930539J05Rik	4930539J05Rik	TSS10878	chr3:135099186-135101629	-	-	1.468	0.68899	2.24701	OK	0.81753	0.326322	1.30874	OK	0.622968	0.19501	1.05093	OK
4930542N07Rik	-	-	4930542N07Rik	4930542N07Rik	TSS20206	chrX:150916544-150919225	-	-	0	0	0	OK	0	0	0	OK	0	0	0	OK
4930544D05Rik	-	-	4930544D05Rik	4930544D05Rik	TSS7101	chr11:70428384-70432696	-	-	0	0	0	OK	0	0	0	OK	0	0	0	OK
4930544G11Rik	-	-	4930544G11Rik	4930544G11Rik	TSS1029	chr6:65902564-65904008	-	-	0	0	0	OK	0	0	0	OK	0	0	0	OK
4930544O15Rik	-	-	4930544O15Rik	4930544O15Rik	TSS20884	chr4:115452438-115453639	-	-	0.933552	0.483491	1.38361	OK	0.693705	0.350611	1.0368	OK	0.193277	0.0526808	0.333872	OK
4930547C10Rik	-	-	4930547C10Rik	4930547C10Rik	TSS551	chr4:52609145-52625035	-	-	0	0	0	OK	0	0	0	OK	0	0	0	OK
4930547N16Rik	-	-	4930547N16Rik	4930547N16Rik	TSS10912	chr10:87553816-87609686	-	-	0.222878	0.119328	0.326428	OK	0.100006	0.0466071	0.153404	OK	2.2582	1.82176	2.69465	OK
4930548H24Rik	-	-	4930548H24Rik	4930548H24Rik	TSS6793	chr5:31788231-31790635	-	-	0.012789	0	0.0346694	OK	0.011253	0	0.0291022	OK	0	0	0	OK
4930549C01Rik	-	-	4930549C01Rik	4930549C01Rik	TSS2536	chr4:136166351-136169128	-	-	0.0695779	0	0.153436	OK	0.0298288	0	0.0771424	OK	0	0	0	OK
4930550C14Rik	-	-	4930550C14Rik	4930550C14Rik	TSS16155	chr9:53213390-53240908	-	-	4.54894	3.42594	5.67194	OK	2.59069	1.8907	3.29069	OK	2.28895	1.63218	2.94571	OK
4930550L24Rik	-	-	4930550L24Rik	4930550L24Rik	TSS22822	chrX:56164637-56173481	-	-	0.00553492	0	0.0193038	OK	0.00710249	0	0.0209002	OK	0	0	0	OK
4930555G01Rik	-	-	4930555G01Rik	4930555G01Rik	TSS21885	chr14:5153653-5162268	-	-	0.00175791	0	0.00845849	OK	0	0	0	OK	0.0129037	0	0.0287983	OK
4930555I21Rik	-	-	4930555I21Rik	4930555I21Rik	TSS19420	chr4:135051901-135093718	-	-	0.418523	0.241073	0.595973	OK	0.29355	0.163641	0.423458	OK	0.0111198	0	0.0248171	OK
4930558C23Rik	-	-	4930558C23Rik	4930558C23Rik	TSS14627	chr3:95190379-95206763	-	-	0	0	0	OK	0	0	0	OK	0	0	0	OK
4930562C15Rik	-	-	4930562C15Rik	4930562C15Rik	TSS11536	chr16:4835415-4867691	-	-	0.0101371	0	0.022505	OK	0.0177006	0.00152513	0.0338761	OK	0.0703898	0.02916	0.11162	OK
4930563D23Rik	-	-	4930563D23Rik	4930563D23Rik	TSS13268	chr16:92319007-92321686	-	-	0.00528371	0	0.0153998	OK	0.0141974	0	0.030118	OK	0	0	0	OK
4930563E22Rik	-	-	4930563E22Rik	4930563E22Rik	TSS12886	chr11:72025225-72031952	-	-	0.408935	0.18696	0.630909	OK	0.563288	0.342451	0.784125	OK	0.578253	0.339643	0.816862	OK
4930567H12Rik	-	-	4930567H12Rik	4930567H12Rik	TSS19606	chr8:128108537-128140570	-	-	0.0153423	0	0.0445695	OK	0.0126851	0	0.0373281	OK	0.0332957	0	0.0743089	OK
4930567H17Rik	-	-	4930567H17Rik	4930567H17Rik	TSS14342	chrX:67647075-67647915	-	-	0	0	0	OK	0	0	0	OK	0	0	0	OK
4930568D16Rik	-	-	4930568D16Rik	4930568D16Rik	TSS14652	chr2:35209737-35223249	-	-	0	0	0	OK	0	0	0	OK	0	0	0	OK
4930571K23Rik	-	-	4930571K23Rik	4930571K23Rik	TSS14667	chr7:132512374-132514527	-	-	0.00561564	0	0.0168108	OK	0.0208587	0	0.0423615	OK	0	0	0	OK
4930572J05Rik	-	-	4930572J05Rik	4930572J05Rik	TSS12109	chr15:74551663-74554803	-	-	9.20487	7.49882	10.9109	OK	6.79988	5.43206	8.16769	OK	0	0	0	OK
4930578C19Rik	-	-	4930578C19Rik	4930578C19Rik	TSS12994	chrX:17995552-18038400	-	-	0	0	0	OK	0.29861	0.153309	0.443911	OK	0	0	0	OK
4930578I06Rik	-	-	4930578I06Rik	4930578I06Rik	TSS12432	chr14:64589958-64606617	-	-	0	0	0	OK	0	0	0	OK	0	0	0	OK
4930578N16Rik	-	-	4930578N16Rik	4930578N16Rik	TSS23312	chr2:69596113-69627543	-	-	1.06209	0.682211	1.44198	OK	0.916214	0.615035	1.21739	OK	0.2327	0.109864	0.355535	OK
4930579C15Rik	-	-	4930579C15Rik	4930579C15Rik	TSS11905	chr4:94573983-94595501	-	-	0.124613	0.0259511	0.223275	OK	0.220136	0.0910536	0.349219	OK	0.134457	0.0420896	0.226824	OK
4930579F01Rik	-	-	4930579F01Rik	4930579F01Rik	TSS5227	chr3:137827098-137849677	-	-	0	0	0	OK	0	0	0	OK	0	0	0	OK
4930579G22Rik	-	-	4930579G22Rik	4930579G22Rik	TSS23093	chr5:130384409-130387151	-	-	2.56668	1.52961	3.60374	OK	2.43948	1.44291	3.43604	OK	0.637429	0.22016	1.0547	OK
4930579G24Rik	-	-	4930579G24Rik	4930579G24Rik	TSS10003	chr3:79433000-79436741	-	-	0.987033	0.637158	1.33691	OK	0.715161	0.456262	0.974059	OK	9.96484	8.35049	11.5792	OK
4930579J09Rik	-	-	4930579J09Rik	4930579J09Rik	TSS22503	chr19:10548746-10557387	-	-	0.127901	0.0364619	0.21934	OK	0.103284	0.0293595	0.177209	OK	0.211162	0.0910765	0.331248	OK
4930579K19Rik	-	-	4930579K19Rik	4930579K19Rik	TSS7415	chr9:98462878-98464030	-	-	1.27455	0.769315	1.77979	OK	1.17401	0.731803	1.61622	OK	1.36569	0.856038	1.87533	OK
4930581F22Rik	-	-	4930581F22Rik	4930581F22Rik	TSS10275	chr9:34854163-34983572	-	-	0.361823	0.0900067	0.633639	OK	0.722652	0.36047	1.08484	OK	0.221118	0	0.487678	OK
4930583H14Rik	-	-	4930583H14Rik	4930583H14Rik	TSS12836	chr3:51192334-51200469	-	-	0.380636	0.166132	0.595139	OK	0.221664	0.0809432	0.362384	OK	0.270117	0.110908	0.429325	OK
4930583K01Rik	-	-	4930583K01Rik	4930583K01Rik	TSS21171	chr7:125387420-125389065	-	-	0.0772923	0	0.157079	OK	0.0781036	0.00672959	0.149478	OK	0.0334038	0	0.0745502	OK
4930584F24Rik	-	-	4930584F24Rik	4930584F24Rik	TSS17093	chr5:26786609-26819854	-	-	0	0	0	OK	0	0	0	OK	0	0	0	OK
4930588N13Rik	-	-	4930588N13Rik	4930588N13Rik	TSS15349	chr5:150242280-150273195	-	-	1.24517	0.751093	1.73926	OK	0.991368	0.60739	1.37535	OK	0.624998	0.341846	0.908149	OK
4930590J08Rik	-	-	4930590J08Rik	4930590J08Rik	TSS21661	chr6:91854226-91900719	-	-	0.0131731	0	0.0280452	OK	0.0244428	0.00355188	0.0453338	OK	0.00783608	0	0.0174885	OK
4930592I03Rik	-	-	4930592I03Rik	4930592I03Rik	TSS6407	chr18:83080270-83174706	-	-	0.770028	0	4.6419	OK	0.793098	0	4.39325	OK	0.0309041	0	0.285689	OK
4930594C11Rik	-	-	4930594C11Rik	4930594C11Rik	TSS23771	chr1:37496184-37593104	-	-	0.523137	0.238558	0.807717	OK	0.345641	0.11739	0.573892	OK	0.832997	0.490664	1.17533	OK
4930595M18Rik	-	-	4930595M18Rik	4930595M18Rik	TSS20202	chrX:78664913-78703461	-	-	0	0	0	OK	0	0	0	OK	0	0	0	OK
4930596D02Rik	-	-	4930596D02Rik	4930596D02Rik	TSS19721	chr14:36622671-36625164	-	-	0	0	0	OK	0	0	0	OK	0	0	0	OK
4931406B18Rik	-	-	4931406B18Rik	4931406B18Rik	TSS7781	chr7:50747413-50761308	-	-	0.00106949	0	0.00458088	OK	0	0	0	OK	0	0	0	OK
4931406C07Rik	-	-	4931406C07Rik	4931406C07Rik	TSS11791,TSS12035,TSS16067	chr9:15087780-15162232	-	-	9.25297	7.34416	11.1618	OK	7.05198	5.50879	8.59518	OK	5.47987	3.94056	7.01919	OK
4931406H21Rik	-	-	4931406H21Rik	4931406H21Rik	TSS4780	chr14:26278777-26484195	-	-	0.0935104	0	0.357416	OK	0.336886	0	0.924998	OK	0.0861514	0	0.305199	OK
4931406P16Rik	-	-	4931406P16Rik	4931406P16Rik	TSS10590	chr7:35021732-35070628	-	-	7.14892	6.02371	8.27412	OK	7.96348	6.69678	9.23019	OK	3.76078	3.16706	4.35451	OK
4931407G18Rik	-	-	4931407G18Rik	4931407G18Rik	TSS15775	chr5:88408475-88410566	-	-	0	0	0	OK	0	0	0	OK	0	0	0	OK
4931408A02Rik	-	-	4931408A02Rik	4931408A02Rik	TSS7456	chr16:90831103-90905130	-	-	1.85056	1.29395	2.40718	OK	1.50284	1.04945	1.95623	OK	1.3906	0.945755	1.83544	OK
4931408C20Rik	-	-	4931408C20Rik	4931408C20Rik	TSS4617	chr1:26738645-26744305	-	-	0	0	0	OK	0	0	0	OK	0	0	0	OK
4931409K22Rik	-	-	4931409K22Rik	4931409K22Rik	TSS20874	chr5:24049251-24061287	-	-	0.0356641	0	0.0922634	OK	0.0346556	0	0.0731416	OK	0.068478	0.0212576	0.115698	OK
4931414P19Rik	-	-	4931414P19Rik	4931414P19Rik	TSS21529	chr14:55202499-55224745	-	-	2.3858	1.83016	2.94144	OK	2.14279	1.6546	2.63097	OK	2.33105	1.8165	2.8456	OK
4931417E11Rik	-	-	4931417E11Rik	4931417E11Rik	TSS23194	chr6:73418575-73419661	-	-	0	0	0	OK	0	0	0	OK	0.029991	0	0.0669336	OK
4931417G12Rik	-	-	4931417G12Rik	4931417G12Rik	TSS12344	chr6:113546755-113550709	-	-	0.0281089	0	0.0638934	OK	0.0305309	0	0.0632641	OK	0.181912	0.0718138	0.29201	OK
4931423N10Rik	-	-	4931423N10Rik	4931423N10Rik	TSS7569	chr2:23062995-23122649	-	-	0.0126422	0	0.032524	OK	0.014183	0	0.0320321	OK	0	0	0	OK
4931428F04Rik	-	-	4931428F04Rik	4931428F04Rik	TSS23680	chr8:107800346-107813428	-	-	2.46701	1.81136	3.12266	OK	2.37154	1.82387	2.91922	OK	15.1211	12.2023	18.0398	OK
4931428L18Rik	-	-	4931428L18Rik	4931428L18Rik	TSS21183	chr1:31197922-31279501	-	-	0	0	0	OK	0	0	0	OK	0	0	0	OK
4931429I11Rik	-	-	4931429I11Rik	4931429I11Rik	TSS9808	chr9:40702931-40772195	-	-	2.18598	1.69598	2.67597	OK	1.22582	0.923566	1.52808	OK	0	0	0	OK
4931429L15Rik	-	-	4931429L15Rik	4931429L15Rik	TSS3473	chr9:46111443-46128069	-	-	0.00178397	0	0.00858392	OK	0.00262375	0	0.00983209	OK	0	0	0	OK
4931440F15Rik	-	-	4931440F15Rik	4931440F15Rik	TSS8640	chr11:29592897-29926033	-	-	0.11037	0	0.770552	OK	0.162316	0	0.905956	OK	0.138896	0	0.817869	OK
4931440L10Rik	-	-	4931440L10Rik	4931440L10Rik	TSS10371	chr1:136437521-136443599	-	-	0.00949078	0	0.0409717	OK	0	0	0	OK	0	0	0	OK
4931440P22Rik	-	-	4931440P22Rik	4931440P22Rik	TSS23081	chr3:65331406-65359440	-	-	0.481083	0.090457	0.871708	OK	0.414769	0.0729538	0.756584	OK	0.643448	0.0813665	1.20553	OK
4932411E22Rik	-	-	4932411E22Rik	4932411E22Rik	TSS12087	chr11:89251536-89280262	-	-	0.00685979	0	0.0182053	OK	0.0122575	0	0.0267428	OK	0	0	0	OK
4932411G14Rik	-	-	4932411G14Rik	4932411G14Rik	TSS18713	chr13:59827285-59833113	-	-	0.00104121	0	0.00445974	OK	0.00392551	0	0.0101521	OK	0	0	0	OK
4932411N23Rik	-	-	4932411N23Rik	4932411N23Rik	TSS11459	chrX:123346993-123350397	-	-	0	0	0	OK	0	0	0	OK	0	0	0	OK
4932412H11Rik	-	-	4932412H11Rik	4932412H11Rik	TSS12191	chr5:3845172-3866596	-	-	0.00993033	0	0.0231261	OK	0.0301984	0.00616159	0.0542352	OK	0.00869113	0	0.0193968	OK
4932414J04Rik	-	-	4932414J04Rik	4932414J04Rik	TSS4925	chr11:21394732-21411183	-	-	0	0	0	OK	0	0	0	OK	0	0	0	OK
4932414N04Rik	-	-	4932414N04Rik	4932414N04Rik	TSS18765	chr2:68495940-68586522	-	-	0	0	0	OK	0	0	0	OK	0	0	0	OK
4932415G12Rik	-	-	4932415G12Rik	4932415G12Rik	TSS11980	chr10:94136237-94151358	-	-	4.51144	3.75191	5.27097	OK	3.74934	3.12927	4.36942	OK	3.25927	2.70797	3.81057	OK
4932415M13Rik	-	-	4932415M13Rik	4932415M13Rik	TSS7277	chr17:53863075-53865058	-	-	0	0	0	OK	0	0	0	OK	0	0	0	OK
4932416H05Rik	-	-	4932416H05Rik	4932416H05Rik	TSS8228	chr2:129624104-129658021	-	-	2.29825	1.31261	3.2839	OK	1.91692	1.0273	2.80654	OK	1.11753	0	2.29665	OK
4932418E24Rik	-	-	4932418E24Rik	4932418E24Rik	TSS11901	chr2:26127166-26150077	-	-	0	0	0	OK	0.00172031	0	0.00644657	OK	0	0	0	OK
4932425I24Rik	-	-	4932425I24Rik	4932425I24Rik	TSS4851	chr16:38297839-38341946	-	-	0.637986	0.410333	0.865639	OK	0.534361	0.348054	0.720668	OK	0.0201142	0.000491048	0.0397373	OK
4932429P05Rik	-	-	4932429P05Rik	4932429P05Rik	TSS17275	chrX:86997606-87000830	-	-	0	0	0	OK	0	0	0	OK	0	0	0	OK
4932435O22Rik	-	-	4932435O22Rik	4932435O22Rik	TSS8871	chr11:114274718-114310174	-	-	0.00416983	0	0.0121134	OK	0.0227094	0.00289357	0.0425252	OK	0	0	0	OK
4932438A13Rik	-	-	4932438A13Rik	4932438A13Rik	TSS2135	chr3:36762027-36951955	-	-	9.42857	7.61285	11.2443	OK	11.0702	8.5588	13.5815	OK	2.85923	2.39932	3.31914	OK
4932438H23Rik	-	-	4932438H23Rik	4932438H23Rik	TSS19576	chr16:91054179-91069390	-	-	0.0232202	0	0.0491566	OK	0.0449521	0.00882439	0.0810798	OK	0.0110289	0	0.028183	OK
4932441B19Rik	-	-	4932441B19Rik	4932441B19Rik	TSS5406	chr13:65134365-65139312	-	-	0	0	0	OK	0	0	0	OK	0	0	0	OK
4932441J04Rik	-	-	4932441J04Rik	4932441J04Rik	TSS4179	chr5:57961322-58109158	-	-	0	0	0	OK	0	0	0	OK	0	0	0	OK
4932443I19Rik	-	-	4932443I19Rik	4932443I19Rik	TSS11205	chr8:13705888-13743066	-	-	0	0	0	OK	0	0	0	OK	0	0	0	OK
4933400A11Rik	-	-	4933400A11Rik	4933400A11Rik	TSS3098	chrX:166123178-166428729	-	-	0.0193517	0	0.119597	OK	0.0870802	0	0.278104	OK	0	0	0	OK
4933400C05Rik	-	-	4933400C05Rik	4933400C05Rik	TSS23441	chr11:103069440-103079746	-	-	0.0367172	0	0.080955	OK	0.0387334	0	0.0802607	OK	0.0516718	0.00126147	0.102082	OK
4933400F21Rik	-	-	4933400F21Rik	4933400F21Rik	TSS14921	chr1:91351385-91791857	-	-	0.0337434	0	0.176497	OK	0.163526	0	0.5065	OK	0.0335788	0	0.463403	OK
4933401B06Rik	-	-	4933401B06Rik	4933401B06Rik	TSS11117	chrX:104737920-104739139	-	-	0	0	0	OK	0	0	0	OK	0	0	0	OK
4933402E13Rik	-	-	4933402E13Rik	4933402E13Rik	TSS12483,TSS2154	chrX:59536673-59545253	-	-	0	0	0	OK	0	0	0	OK	0	0	0	OK
4933402J07Rik	-	-	4933402J07Rik	4933402J07Rik	TSS2554	chr8:90087805-90113096	-	-	0	0	0	OK	0	0	0	OK	0	0	0	OK
4933402N03Rik	-	-	4933402N03Rik	4933402N03Rik	TSS16571	chr7:138281860-138289797	-	-	0	0	0	OK	0.00937193	0	0.0275784	OK	0	0	0	OK
4933402N22Rik	-	-	4933402N22Rik	4933402N22Rik	TSS14214	chr5:11918042-11922804	-	-	0.00208291	0	0.0124605	OK	0	0	0	OK	0	0	0	OK
4933402P03Rik	-	-	4933402P03Rik	4933402P03Rik	TSS10329	chr11:69630067-69631942	-	-	0.0026158	0	0.0112041	OK	0.00353192	0	0.0132353	OK	0	0	0	OK
4933403F05Rik	-	-	4933403F05Rik	4933403F05Rik	TSS17045	chr18:68419838-68459987	-	-	3.48964	2.9418	4.03748	OK	3.17908	2.68214	3.67601	OK	1.71316	1.43427	1.99205	OK
4933403G14Rik	-	-	4933403G14Rik	4933403G14Rik	TSS2414	chr8:128193717-128197265	-	-	1.8226	1.40456	2.24064	OK	1.51062	1.17287	1.84837	OK	0.0155432	0.000379457	0.030707	OK
4933403O03Rik	-	-	4933403O03Rik	4933403O03Rik	TSS13035	chr10:57692726-57695423	-	-	0	0	0	OK	0.0037348	0	0.0178297	OK	0	0	0	OK
4933403O08Rik	-	-	4933403O08Rik	4933403O08Rik	TSS21341	chrX:109352657-109357461	-	-	0.0313269	0	0.0691741	OK	0.0131127	0	0.0311252	OK	0	0	0	OK
4933404M02Rik	-	-	4933404M02Rik	4933404M02Rik	TSS17740	chr2:70346875-70378941	-	-	0.0374122	0	0.0769373	OK	0.0595196	0.0105291	0.10851	OK	0	0	0	OK
4933404O12Rik	-	-	4933404O12Rik	4933404O12Rik	TSS23050	chr5:137395015-137412979	-	-	3.5577	2.92252	4.19289	OK	2.47546	2.01535	2.93557	OK	2.43175	1.98315	2.88035	OK
4933405L10Rik	-	-	4933405L10Rik	4933405L10Rik	TSS6919	chr8:108232202-108234068	-	-	0.0346724	0	0.0785318	OK	0.0714298	0.00443518	0.138424	OK	0.0333485	0	0.0744269	OK
4933405O20Rik	-	-	4933405O20Rik	4933405O20Rik	TSS17889	chr7:57230719-58118659	-	-	0.220503	0	1.43392	OK	0.394595	0	1.74228	OK	0.0215402	0	0.110661	OK
4933406F09Rik	-	-	4933406F09Rik	4933406F09Rik	TSS10715	chr14:8244986-8255199	-	-	0	0	0	OK	0	0	0	OK	0	0	0	OK
4933406I18Rik	-	-	4933406I18Rik	4933406I18Rik	TSS23294	chr7:121458992-121558675	-	-	0.582269	0.16883	0.995707	OK	0.845309	0.381803	1.30882	OK	0.187459	0.0309605	0.343958	OK
4933406J08Rik	-	-	4933406J08Rik	4933406J08Rik	TSS191	chr2:122012007-122032129	-	-	0.0017167	0	0.00826021	OK	0	0	0	OK	0	0	0	OK
4933406K04Rik	-	-	4933406K04Rik	4933406K04Rik	TSS2310	chr12:107923816-107954534	-	-	0	0	0	OK	0	0	0	OK	0	0	0	OK
4933406M09Rik	-	-	4933406M09Rik	4933406M09Rik	TSS2240	chr1:136282516-136287560	-	-	0	0	0	OK	0.00303851	0	0.0113863	OK	0	0	0	OK
4933407C03Rik	-	-	4933407C03Rik	4933407C03Rik	TSS19352,TSS2244	chr8:119780918-119985405	-	-	52.2044	40.3892	64.0196	OK	40.1623	31.2414	49.0832	OK	40.2912	31.344	49.2385	OK
4933407H18Rik	-	-	4933407H18Rik	4933407H18Rik	TSS9116	chr5:33721344-33762403	-	-	3.36817	2.82869	3.90765	OK	3.57783	3.01812	4.13755	OK	1.60473	1.32988	1.87959	OK
4933407K13Rik	-	-	4933407K13Rik	4933407K13Rik	TSS8530	chrX:72970796-73010038	-	-	0.804334	0.552265	1.0564	OK	1.02654	0.754998	1.29808	OK	0.694162	0.481466	0.906858	OK
4933407L21Rik	-	-	4933407L21Rik	4933407L21Rik	TSS1257	chr1:87825057-87828331	-	-	0.00446573	0	0.0193498	OK	0.0486459	0	0.098794	OK	0.0569963	0.00139145	0.112601	OK
4933407P14Rik	-	-	4933407P14Rik	4933407P14Rik	TSS20997	chr11:104047640-104052480	-	-	0	0	0	OK	0	0	0	OK	0	0	0	OK
4933408B17Rik	-	-	4933408B17Rik	4933408B17Rik	TSS13080	chr18:34739499-34757122	-	-	0.138737	0.0535021	0.223972	OK	0.287951	0.162256	0.413646	OK	0.255433	0.138115	0.37275	OK
4933409G03Rik	-	-	4933409G03Rik	4933409G03Rik	TSS17210	chr2:68420469-68454520	-	-	0	0	0	OK	0	0	0	OK	0	0	0	OK
4933409K07Rik	-	-	4933409K07Rik	4933409K07Rik	TSS10977,TSS16246,TSS23151	chr4:42452732-42476567	-	-	0.235551	0.13614	0.334961	OK	0.290196	0.185551	0.394841	OK	0	0	0	OK
4933411G11Rik	-	-	4933411G11Rik	4933411G11Rik	TSS7176	chr5:143942695-143966747	-	-	0.00220666	0	0.00956137	OK	0	0	0	OK	0	0	0	OK
4933411K16Rik	-	-	4933411K16Rik	4933411K16Rik	TSS19843	chr19:42120340-42145429	-	-	0.0612539	0	0.134676	OK	0.12355	0.016136	0.230964	OK	0.0615451	0	0.137184	OK
4933411K20Rik	-	-	4933411K20Rik	4933411K20Rik	TSS11910	chr8:47254909-47280944	-	-	9.5205	8.02958	11.0114	OK	7.5477	6.36475	8.73065	OK	2.58449	2.14016	3.02883	OK
4933412E24Rik	-	-	4933412E24Rik	4933412E24Rik	TSS11213	chr15:59846420-59848173	-	-	0	0	0	OK	0	0	0	OK	0	0	0	OK
4933413G19Rik	-	-	4933413G19Rik	4933413G19Rik	TSS9049	chr6:128313011-128335162	-	-	0	0	0	OK	0.0103692	0	0.058297	OK	0	0	0	OK
4933415F23Rik	-	-	4933415F23Rik	4933415F23Rik	TSS7299	chr1:23107312-23109092	-	-	0	0	0	OK	0	0	0	OK	0	0	0	OK
4933416C03Rik	-	-	4933416C03Rik	4933416C03Rik	TSS18292	chr10:115455418-115711985	-	-	0.0901311	0	0.254084	OK	0.188377	0.00347683	0.373278	OK	0.038154	0	0.122324	OK
4933417A18Rik	-	-	4933417A18Rik	4933417A18Rik	TSS3804	chr13:35016277-35055678	-	-	0.00376276	0	0.0310972	OK	0	0	0	OK	0	0	0	OK
4933417G07Rik	-	-	4933417G07Rik	4933417G07Rik	TSS8436	chr3:55429119-55987623	-	-	0.299232	0	1.58861	OK	0.44424	0	2.43308	OK	1.17108	0	2.89852	OK
4933421E11Rik	-	-	4933421E11Rik	4933421E11Rik	TSS11120,TSS4840	chr3:106487904-106539494	-	-	6.69439	5.47176	7.91703	OK	5.61368	4.59969	6.62768	OK	2.87023	2.16631	3.57416	OK
4933421I07Rik	-	-	4933421I07Rik	4933421I07Rik	TSS15018	chr7:49700831-49703450	-	-	0	0	0	OK	0.0041397	0	0.0155129	OK	0	0	0	OK
4933421O10Rik	-	-	4933421O10Rik	4933421O10Rik	TSS2168	chr4:33114113-33118298	-	-	7.17877	6.03558	8.32195	OK	5.37039	4.51328	6.2275	OK	2.12404	1.70565	2.54243	OK
4933422H20Rik	-	-	4933422H20Rik	4933422H20Rik	TSS22670	chr11:115301858-115309582	-	-	0	0	0	OK	0	0	0	OK	0	0	0	OK
4933424B01Rik	-	-	4933424B01Rik	4933424B01Rik	TSS15720	chr6:146498153-146526357	-	-	7.89603	6.61907	9.173	OK	6.12839	5.13988	7.1169	OK	8.41811	7.09481	9.74141	OK
4933425L06Rik	-	-	4933425L06Rik	4933425L06Rik	TSS10587	chr13:105872201-105911862	-	-	0.00503212	0	0.0162607	OK	0	0	0	OK	0	0	0	OK
4933425O20Rik	-	-	4933425O20Rik	4933425O20Rik	TSS13136	chr2:130232257-130233530	-	-	0.0433648	0	0.0932621	OK	0.0764152	0.00823789	0.144593	OK	0.0264818	0	0.0591018	OK
4933426M11Rik	-	-	4933426M11Rik	4933426M11Rik	TSS13241	chr12:81891545-81981820	-	-	12.3308	10.3621	14.2996	OK	12.9841	10.8559	15.1122	OK	12.383	10.3523	14.4138	OK
4933427D06Rik	-	-	4933427D06Rik	4933427D06Rik	TSS14332	chr6:89046108-89060031	-	-	0	0	0	OK	0	0	0	OK	0	0	0	OK
4933427D14Rik	-	-	4933427D14Rik	4933427D14Rik	TSS22472	chr11:71967598-72016873	-	-	3.19151	2.62154	3.76147	OK	2.81788	2.33112	3.30465	OK	2.70866	2.23656	3.18077	OK
4933427E11Rik	-	-	4933427E11Rik	4933427E11Rik	TSS908	chr15:74534992-74540804	-	-	0.132293	0	0.338235	OK	0.0565916	0	0.183909	OK	0	0	0	OK
4933429O19Rik	-	-	4933429O19Rik	4933429O19Rik	TSS16537	chr14:49498547-49506787	-	-	0	0	0	OK	0	0	0	OK	0	0	0	OK
4933430H15Rik	-	-	4933430H15Rik	4933430H15Rik	TSS12295	chr3:87422672-87552545	-	-	0.0526395	0	0.431232	OK	0.132087	0	0.490466	OK	0.0443619	0	0.429327	OK
4933430I17Rik	-	-	4933430I17Rik	4933430I17Rik	TSS12262	chr4:62186402-62209027	-	-	0.161059	0.0589558	0.263163	OK	0.203302	0.0939201	0.312685	OK	0.0923427	0.0289064	0.155779	OK
4933431E20Rik	-	-	4933431E20Rik	4933431E20Rik	TSS20822	chr3:107680147-107701603	-	-	1.42016	1.06204	1.77828	OK	1.60751	1.25093	1.9641	OK	1.24513	0.796416	1.69384	OK
4933432B09Rik	-	-	4933432B09Rik	4933432B09Rik	TSS13661	chr15:79440005-79489386	-	-	0.848697	0.626967	1.07043	OK	0.749289	0.565967	0.932611	OK	0.154202	0.0904925	0.217911	OK
4933432I09Rik	-	-	4933432I09Rik	4933432I09Rik	TSS19116,TSS20686	chr16:18209778-18213956	-	-	0.348733	0.0984199	0.599046	OK	0.48017	0.216778	0.743562	OK	0.0842996	0.0174236	0.151176	OK
4933433C11Rik	-	-	4933433C11Rik	4933433C11Rik	TSS21261	chr2:25068078-25070150	-	-	0.0235142	0	0.0543665	OK	0.00834701	0	0.0245624	OK	0.0428056	0.00104502	0.0845662	OK
4933433P14Rik	-	-	4933433P14Rik	4933433P14Rik	TSS22336	chr12:106923561-106941267	-	-	6.97926	5.80633	8.15219	OK	4.86699	4.02246	5.71151	OK	7.07018	5.93165	8.20872	OK
4933434E20Rik	-	-	4933434E20Rik	4933434E20Rik	TSS12638	chr3:89856738-89866369	-	-	13.0994	10.8363	15.3625	OK	9.39253	7.70075	11.0843	OK	24.0765	20.2909	27.8622	OK
4933434I20Rik	-	-	4933434I20Rik	4933434I20Rik	TSS3472	chr8:85872370-85903301	-	-	0	0	0	OK	0	0	0	OK	0	0	0	OK
4933436C20Rik	-	-	4933436C20Rik	4933436C20Rik	TSS2058	chr8:94849936-94880019	-	-	0.00447196	0	0.0191545	OK	0	0	0	OK	1.48507	0.9531	2.01704	OK
4933436I01Rik	-	-	4933436I01Rik	4933436I01Rik	TSS19331	chrX:65173038-65174625	-	-	0	0	0	OK	0	0	0	OK	0	0	0	OK
4933437F05Rik	-	-	4933437F05Rik	4933437F05Rik	TSS9991	chr12:88562072-88579551	-	-	0.764945	0.436496	1.09339	OK	0.459251	0.247192	0.67131	OK	0	0	0	OK
4933439C10Rik	-	-	4933439C10Rik	4933439C10Rik	TSS16284	chr11:59299022-59324569	-	-	3.8885	2.62466	5.15234	OK	4.84535	3.33906	6.35164	OK	4.28061	2.12066	6.44056	OK
4933439F11Rik	-	-	4933439F11Rik	4933439F11Rik	TSS13345	chr11:102742557-102748045	-	-	0.023084	0	0.0809025	OK	0.0406817	0	0.114312	OK	0.0444262	0	0.113129	OK
4933439F18Rik	-	-	4933439F18Rik	4933439F18Rik	TSS2255	chr11:60230646-60258779	-	-	6.35426	5.33978	7.36875	OK	5.73951	4.83523	6.64378	OK	4.55647	3.82586	5.28707	OK
5031410I06Rik	-	-	5031410I06Rik	5031410I06Rik	TSS6426	chr5:26425207-26431854	-	-	0	0	0	OK	0.00171649	0	0.00643225	OK	0	0	0	OK
5031414D18Rik	-	-	5031414D18Rik	5031414D18Rik	TSS11440	chr14:75415833-75452339	-	-	0.234823	0.118067	0.35158	OK	0.239424	0.12887	0.349978	OK	0.0847754	0.0315479	0.138003	OK
5031425F14Rik	-	-	5031425F14Rik	5031425F14Rik	TSS15545	chr2:166272950-166284270	-	-	0	0	0	OK	0.0118154	0	0.0305567	OK	0	0	0	OK
5031426D15Rik	-	-	5031426D15Rik	5031426D15Rik	TSS3750	chr2:6460743-7317825	-	-	0.00137274	0	0.0178232	OK	0.031756	0	0.101315	OK	0	0	0	OK
5031434O11Rik	-	-	5031434O11Rik	5031434O11Rik	TSS22142	chr3:51319239-51371038	-	-	1.12674	0	3.89079	OK	1.27684	0	4.35048	OK	0.0534808	0	0.373235	OK
5031439G07Rik	-	-	5031439G07Rik	5031439G07Rik	TSS2418	chr15:84776149-84818401	-	-	8.92947	7.52357	10.3354	OK	8.58592	7.22403	9.9478	OK	14.9237	12.3614	17.486	OK
5033404E19Rik	-	-	5033404E19Rik	5033404E19Rik	TSS11264	chr1:187321184-187321893	-	-	0	0	0	OK	0	0	0	OK	0	0	0	OK
5033406O09Rik	-	-	5033406O09Rik	5033406O09Rik	TSS19621	chr12:113180201-113182693	-	-	0.18523	0.0714869	0.298972	OK	0.193338	0.0830928	0.303582	OK	0.135349	0.050368	0.22033	OK
5033411D12Rik	-	-	5033411D12Rik	5033411D12Rik	TSS15024	chr13:16949309-17786599	-	-	3.43479	2.60493	4.26466	OK	1.85055	1.34184	2.35926	OK	0.259056	0.125184	0.392928	OK
5033414D02Rik	-	-	5033414D02Rik	5033414D02Rik	TSS1316	chr19:29423166-29436361	-	-	9.13398	7.06133	11.2066	OK	8.13823	6.39282	9.88365	OK	16.1416	13.2418	19.0415	OK
5133401N09Rik	-	-	5133401N09Rik	5133401N09Rik	TSS7477	chr13:58259009-58266054	-	-	5.23075	3.90906	6.55244	OK	4.20555	3.29082	5.12029	OK	4.22806	3.13331	5.32281	OK
5330413P13Rik	-	-	5330413P13Rik	5330413P13Rik	TSS770	chr2:131645741-131673392	-	-	0.592367	0.393966	0.790768	OK	0.547632	0.37415	0.721115	OK	0.0147153	0.000359244	0.0290713	OK
5330417C22Rik	-	-	5330417C22Rik	5330417C22Rik	TSS21614	chr3:108260986-108339440	-	-	72.8853	56.564	89.2067	OK	66.4658	51.0218	81.9097	OK	23.5852	19.5526	27.6178	OK
5330426P16Rik	-	-	5330426P16Rik	5330426P16Rik	TSS5215	chr16:50726863-50732886	-	-	0.724881	0.43578	1.01398	OK	1.10845	0.754328	1.46257	OK	0.889117	0.58022	1.19801	OK
5330434G04Rik	-	-	5330434G04Rik	5330434G04Rik	TSS781	chrX:102568332-102587093	-	-	2.44428	1.9328	2.95576	OK	1.72927	1.371	2.08754	OK	2.9585	2.43731	3.4797	OK
5330437I02Rik	-	-	5330437I02Rik	5330437I02Rik	TSS20566	chr18:65857921-65911191	-	-	0.46503	0.29323	0.63683	OK	0.268334	0.159304	0.377364	OK	0	0	0	OK
5330439B14Rik	-	-	5330439B14Rik	5330439B14Rik	TSS10670	chr6:142536381-142650794	-	-	0.097649	0	0.198961	OK	0.117189	0	0.290981	OK	0	0	0	OK
5430402E10Rik	-	-	5430402E10Rik	5430402E10Rik	TSS15531	chrX:75233629-75238906	-	-	0	0	0	OK	0	0	0	OK	0	0	0	OK
5430402O13Rik	-	-	5430402O13Rik	5430402O13Rik	TSS10964	chr6:50516641-50546589	-	-	0.325835	0	0.69706	OK	0.3993	0.0504394	0.748161	OK	0.0771066	0	0.167837	OK
5430405G05Rik	-	-	5430405G05Rik	5430405G05Rik	TSS12524	chr2:151527743-151533046	-	-	0.112681	0.0243085	0.201054	OK	0.145967	0.0437311	0.248203	OK	0	0	0	OK
5430405H02Rik	-	-	5430405H02Rik	5430405H02Rik	TSS19200	chr2:156665812-156688681	-	-	2.23568	1.46782	3.00355	OK	1.6361	1.03682	2.23538	OK	1.2846	0.732919	1.83628	OK
5430407P10Rik	-	-	5430407P10Rik	5430407P10Rik	TSS6161	chr2:6019545-6051231	-	-	0.401265	0.218478	0.584052	OK	0.931764	0.649846	1.21368	OK	0	0	0	OK
5430411K18Rik	-	-	5430411K18Rik	5430411K18Rik	TSS18783	chr18:78135205-78231766	-	-	4.41712	3.72466	5.10958	OK	5.41439	4.54673	6.28205	OK	5.54754	4.64997	6.44512	OK
5430413K10Rik	-	-	5430413K10Rik	5430413K10Rik	TSS480	chr2:154132979-154146378	-	-	0.00168666	0	0.00830498	OK	0.0153852	0	0.0335732	OK	0	0	0	OK
5430416N02Rik	-	-	5430416N02Rik	5430416N02Rik	TSS8425	chr5:100849860-100858554	-	-	2.72812	1.64465	3.81158	OK	2.25184	1.3433	3.16039	OK	6.88471	4.86502	8.9044	OK
5430416O09Rik	-	-	5430416O09Rik	5430416O09Rik	TSS21921	chr4:43742905-43747406	-	-	0	0	0	OK	0.0741915	0.0311843	0.117199	OK	0	0	0	OK
5430417L22Rik	-	-	5430417L22Rik	5430417L22Rik	TSS8891	chr2:118571497-118574543	-	-	8.69536	7.29878	10.0919	OK	7.287	6.11734	8.45666	OK	5.40717	4.49068	6.32366	OK
5430419D17Rik	-	-	5430419D17Rik	5430419D17Rik	TSS12495	chr7:138317915-138394459	-	-	0.0015925	0	0.00690023	OK	0.143226	0.068398	0.218053	OK	0	0	0	OK
5430427O19Rik	-	-	5430427O19Rik	5430427O19Rik	TSS569	chrX:83115611-83136838	-	-	0.00586424	0	0.0147617	OK	0.0301981	0.00750924	0.0528869	OK	0	0	0	OK
5430435G22Rik	-	-	5430435G22Rik	5430435G22Rik	TSS10569	chr1:133585271-133610041	-	-	0.0168687	0	0.038265	OK	0.146714	0.0670685	0.226359	OK	0	0	0	OK
5430437P03Rik	-	-	5430437P03Rik	5430437P03Rik	TSS10289	chr8:73920753-73928671	-	-	19.8751	16.7378	23.0124	OK	15.1564	12.7453	17.5675	OK	42.5613	35.559	49.5636	OK
5530400C23Rik	-	-	5530400C23Rik	5530400C23Rik	TSS19796	chr6:133242233-133245808	-	-	0	0	0	OK	0	0	0	OK	0	0	0	OK
5530601H04Rik	-	-	5530601H04Rik	5530601H04Rik	TSS10358	chrX:102236192-102265463	-	-	1.04782	0.760839	1.33481	OK	1.35872	1.06245	1.65499	OK	0.405999	0.26957	0.542427	OK
5730403B10Rik	-	-	5730403B10Rik	5730403B10Rik	TSS3391	chr16:4726360-4789935	-	-	17.9463	14.0099	21.8826	OK	12.7736	10.1266	15.4206	OK	16.6594	12.6176	20.7012	OK
5730408K05Rik	-	-	5730408K05Rik	5730408K05Rik	TSS1476	chr19:8962876-8963260	-	-	0.751915	0.196519	1.30731	OK	0.618845	0.140926	1.09677	OK	6.72663	4.09595	9.35731	OK
5730409E04Rik	-	-	5730409E04Rik	5730409E04Rik	TSS7458	chr4:126287097-126291615	-	-	3.721	2.87446	4.56755	OK	2.73007	2.15574	3.3044	OK	4.25264	3.4932	5.01208	OK
5730416F02Rik	-	-	5730416F02Rik	5730416F02Rik	TSS23640	chrX:106196823-106197635	-	-	0.00665836	0	0.0285194	OK	0.0171941	0	0.0505965	OK	0	0	0	OK
5730419I09Rik	-	-	5730419I09Rik	5730419I09Rik	TSS22219	chr6:142959439-143048627	-	-	9.71343	8.11396	11.3129	OK	8.9939	7.52189	10.4659	OK	13.6092	11.3482	15.8701	OK
5730422E09Rik	-	-	5730422E09Rik	5730422E09Rik	TSS7577	chr5:149931140-149995639	-	-	0.0597038	0	0.186435	OK	0.0572338	0	0.165897	OK	0	0	0	OK
5730437N04Rik	-	-	5730437N04Rik	5730437N04Rik	TSS23551	chr17:5410863-5440260	-	-	22.9364	19.0946	26.7782	OK	16.2465	13.4281	19.065	OK	32.2876	27.1772	37.3981	OK
5730455O13Rik	-	-	5730455O13Rik	5730455O13Rik	TSS16267	chr19:38262968-38298622	-	-	6.32866	4.98716	7.67015	OK	4.72071	3.72534	5.71607	OK	6.05973	4.84205	7.27741	OK
5730455P16Rik	-	-	5730455P16Rik	5730455P16Rik	TSS23382	chr11:80173993-80191517	-	-	9.55295	8.05675	11.0492	OK	7.20367	6.07634	8.331	OK	4.3269	3.63537	5.01843	OK
5730469M10Rik	-	-	5730469M10Rik	5730469M10Rik	TSS11669	chr14:41807028-41827064	-	-	17.7291	14.8891	20.5691	OK	14.9778	12.5993	17.3563	OK	12.6973	10.6439	14.7507	OK
5730494M16Rik	-	-	5730494M16Rik	5730494M16Rik	TSS2193,TSS2307	chr18:24867945-25327378	-	-	2.77858	1.98902	3.56813	OK	2.08754	1.46248	2.71259	OK	4.39456	3.47784	5.31129	OK
5730494N06Rik	-	-	5730494N06Rik	5730494N06Rik	TSS13768	chr2:132065227-132073524	-	-	14.6082	12.1715	17.045	OK	10.204	8.50146	11.9065	OK	5.1518	4.07528	6.22832	OK
5730507C01Rik	-	-	5730507C01Rik	5730507C01Rik	TSS971	chr12:18521351-18542057	-	-	0.17216	0.0749659	0.269354	OK	0.178025	0.0890739	0.266976	OK	0	0	0	OK
5730508B09Rik	-	-	5730508B09Rik	5730508B09Rik	TSS15305	chr3:127572605-127599241	-	-	1.30039	0.842591	1.75819	OK	1.36847	0.933134	1.80381	OK	1.12425	0.733661	1.51483	OK
5730522E02Rik	-	-	5730522E02Rik	5730522E02Rik	TSS22768	chr11:25516845-26110576	-	-	0.170742	0.0570165	0.284468	OK	0.141487	0.0516171	0.231357	OK	0	0	0	OK
5730528L13Rik	-	-	5730528L13Rik	5730528L13Rik	TSS10001,TSS2493,TSS434	chr4:48552817-48574792	-	-	3.25627	2.36307	4.14948	OK	2.50267	1.8308	3.17453	OK	7.20402	5.80736	8.60067	OK
5730559C18Rik	-	-	5730559C18Rik	5730559C18Rik	TSS9972	chr1:138110107-138130841	-	-	1.63085	1.21698	2.04471	OK	2.0717	1.60898	2.53442	OK	0.0105329	0	0.0235073	OK
5730577I03Rik	-	-	5730577I03Rik	5730577I03Rik	TSS20875	chr9:20411918-20421715	-	-	0.63317	0.39325	0.87309	OK	0.82235	0.565647	1.07905	OK	0.17611	0.0868931	0.265327	OK
5730590G19Rik	-	-	5730590G19Rik	5730590G19Rik	TSS18654	chr7:86805081-86859072	-	-	0.0568672	0.0245593	0.089175	OK	0.0352958	0.0106557	0.059936	OK	1.67628	1.38891	1.96365	OK
5730601F06Rik	-	-	5730601F06Rik	5730601F06Rik	TSS20861	chr9:20299512-20325863	-	-	8.05089	6.72416	9.37762	OK	7.6822	6.35887	9.00553	OK	4.2113	3.54942	4.87319	OK
5830403L16Rik	-	-	5830403L16Rik	5830403L16Rik	TSS8196	chr1:155696671-155698325	-	-	0.028087	0	0.0628057	OK	0.0534177	0.00680635	0.100029	OK	0	0	0	OK
5830405N20Rik	-	-	5830405N20Rik	5830405N20Rik	TSS13045	chr10:129759907-129799698	-	-	0.00505463	0	0.0177369	OK	0.0271977	0	0.0552354	OK	0	0	0	OK
5830411N06Rik	-	-	5830411N06Rik	5830411N06Rik	TSS21148,TSS5991,TSS6817	chr7:147433199-147485690	-	-	0	0	0	OK	0.00642	0	0.0198357	OK	0	0	0	OK
5830415F09Rik	-	-	5830415F09Rik	5830415F09Rik	TSS21816	chr4:46389846-46402295	-	-	1.19124	0.765066	1.61741	OK	0.930723	0.590798	1.27065	OK	1.90315	1.3531	2.4532	OK
5830416P10Rik	-	-	5830416P10Rik	5830416P10Rik	TSS17764	chr19:53515701-53539286	-	-	0.00752831	0	0.0164726	OK	0.0148384	0.00189066	0.0277861	OK	0.0509133	0.0210915	0.080735	OK
5830417I10Rik	-	-	5830417I10Rik	5830417I10Rik	TSS3288	chr3:88580978-88636409	-	-	5.63866	4.68983	6.58749	OK	4.71703	3.90459	5.52948	OK	4.10226	3.4011	4.80341	OK
5830418K08Rik	-	-	5830418K08Rik	5830418K08Rik	TSS8289	chr9:15087780-15162232	-	-	1.66214	1.1951	2.12917	OK	1.74169	1.30511	2.17828	OK	3.271	2.57268	3.96932	OK
5830432E09Rik	-	-	5830432E09Rik	5830432E09Rik	TSS24059	chr7:142729506-142877977	-	-	0.00661242	0	0.0325826	OK	0.0499322	0	0.138105	OK	0	0	0	OK
5830433M19Rik	-	-	5830433M19Rik	5830433M19Rik	TSS21470	chr4:94166769-94223487	-	-	4.99485	3.99993	5.98977	OK	3.74807	3.01058	4.48557	OK	2.46827	1.88736	3.04919	OK
5930412G12Rik	-	-	5930412G12Rik	5930412G12Rik	TSS3996	chr5:129085004-129106562	-	-	0	0	0	OK	0.00236928	0	0.0088785	OK	0	0	0	OK
5930416I19Rik	-	-	5930416I19Rik	5930416I19Rik	TSS22372,TSS2926	chr6:128307017-128312915	-	-	3.81735	2.75503	4.87968	OK	2.62668	1.90239	3.35097	OK	13.024	10.7373	15.3107	OK
5930434B04Rik	-	-	5930434B04Rik	5930434B04Rik	TSS22730	chr2:26865485-26876609	-	-	21.9514	18.4916	25.4113	OK	12.943	10.8293	15.0567	OK	23.3422	19.6935	26.9909	OK
6030405A18Rik	-	-	6030405A18Rik	6030405A18Rik	TSS15441	chr3:54700990-54719809	-	-	0.403214	0.237819	0.568609	OK	0.698123	0.477517	0.918729	OK	0	0	0	OK
6030408B16Rik	-	-	6030408B16Rik	6030408B16Rik	TSS20437	chr15:101123642-101127857	-	-	0.0045862	0	0.015995	OK	0	0	0	OK	0.0157749	0	0.0352062	OK
6030419C18Rik	-	-	6030419C18Rik	6030419C18Rik	TSS7645	chr9:58336409-58347549	-	-	2.26379	1.68663	2.84095	OK	1.64351	1.18711	2.09991	OK	0.0154539	0	0.0344898	OK
6030422M02Rik	-	-	6030422M02Rik	6030422M02Rik	TSS6408	chr1:9898718-9931035	-	-	0.049497	0.00813807	0.0908559	OK	0.0432952	0.00985933	0.076731	OK	0	0	0	OK
6030429G01Rik	-	-	6030429G01Rik	6030429G01Rik	TSS13781	chr7:4474558-4484044	-	-	0.073806	0.0172789	0.130333	OK	0.12086	0.0452252	0.196494	OK	0.0150557	0	0.0336011	OK
6030446N20Rik	-	-	6030446N20Rik	6030446N20Rik	TSS20156	chr18:12140447-12279962	-	-	2.47519	1.89177	3.05861	OK	2.08182	1.60165	2.56199	OK	2.16354	1.67574	2.65133	OK
6030458C11Rik	-	-	6030458C11Rik	6030458C11Rik	TSS17113	chr15:12737931-12754412	-	-	4.39584	3.55452	5.23715	OK	4.68242	3.78482	5.58002	OK	5.83176	4.83752	6.82599	OK
6030468B19Rik	-	-	6030468B19Rik	6030468B19Rik	TSS2231	chr11:117658973-117668622	-	-	0.00843147	0	0.0295864	OK	0.0360289	0	0.0786058	OK	0	0	0	OK
6030498E09Rik	-	-	6030498E09Rik	6030498E09Rik	TSS13388	chrX:36125956-36315865	-	-	0	0	0	OK	0	0	0	OK	0	0	0	OK
6230400D17Rik	-	-	6230400D17Rik	6230400D17Rik	TSS13623	chr14:21521233-21523647	-	-	0.29616	0	0.634319	OK	0.360512	0.0230137	0.69801	OK	0.365197	0	0.817747	OK
6230409E13Rik	-	-	6230409E13Rik	6230409E13Rik	TSS23779	chr4:21858472-21928608	-	-	5.96035	5.01692	6.90378	OK	5.03459	4.23134	5.83785	OK	3.3767	2.84869	3.90471	OK
6230427J02Rik	-	-	6230427J02Rik	6230427J02Rik	TSS7407	chr9:107877897-107897338	-	-	0.176128	0	0.423417	OK	0.679723	0.155021	1.20443	OK	0.468028	0.220373	0.715683	OK
6330403A02Rik	-	-	6330403A02Rik	6330403A02Rik	TSS1381	chr1:182364365-182413635	-	-	0.0361772	0.00885304	0.0635014	OK	0.573174	0.407138	0.739209	OK	0	0	0	OK
6330403K07Rik	-	-	6330403K07Rik	6330403K07Rik	TSS20826	chr11:70845442-70847119	-	-	1.38245	0.908734	1.85616	OK	1.03961	0.666027	1.4132	OK	0.0661756	0.00956635	0.122785	OK
6330406I15Rik	-	-	6330406I15Rik	6330406I15Rik	TSS21940	chr5:150214380-150234278	-	-	1.39612	1.01419	1.77805	OK	1.02413	0.74115	1.30711	OK	0	0	0	OK
6330407A03Rik	-	-	6330407A03Rik	6330407A03Rik	TSS23769	chr4:3605267-3718759	-	-	0.00939819	0	0.0533912	OK	0.0432741	0	0.126903	OK	0	0	0	OK
6330407J23Rik	-	-	6330407J23Rik	6330407J23Rik	TSS4271	chr10:28863801-28919434	-	-	8.46101	7.12938	9.79265	OK	6.69277	5.63717	7.74838	OK	9.55696	8.06305	11.0509	OK
6330408A02Rik	-	-	6330408A02Rik	6330408A02Rik	TSS9395	chr7:13844315-13896776	-	-	1.50949	1.07866	1.94031	OK	1.55591	1.14216	1.96966	OK	0.894819	0	2.25373	OK
6330409N04Rik	-	-	6330409N04Rik	6330409N04Rik	TSS11829	chr14:62153141-62175723	-	-	8.49988	6.95017	10.0496	OK	6.09542	4.96529	7.22554	OK	8.10127	6.69302	9.50952	OK
6330416G13Rik	-	-	6330416G13Rik	6330416G13Rik	TSS18223	chr4:63221393-63247387	-	-	2.75819	2.21201	3.30438	OK	2.235	1.78595	2.68406	OK	3.12034	2.56202	3.67867	OK
6330439K17Rik	-	-	6330439K17Rik	6330439K17Rik	TSS3751	chr2:144296292-144353134	-	-	2.35796	1.95116	2.76475	OK	2.09347	1.74341	2.44352	OK	1.07212	0.860458	1.28378	OK
6330503K22Rik	-	-	6330503K22Rik	6330503K22Rik	TSS59	chr7:125856124-125880532	-	-	2.94141	2.42182	3.461	OK	2.8202	2.35003	3.29037	OK	3.88058	3.26038	4.50077	OK
6330512M04Rik	-	-	6330512M04Rik	6330512M04Rik	TSS11560	chr7:149512014-149558164	-	-	0.110174	0.0454173	0.17493	OK	0.290274	0.171692	0.408856	OK	0	0	0	OK
6330527O06Rik	-	-	6330527O06Rik	6330527O06Rik	TSS12632	chr2:135883662-135895653	-	-	0.012964	0	0.0324656	OK	0.00868068	0	0.0224498	OK	0	0	0	OK
6330545A04Rik	-	-	6330545A04Rik	6330545A04Rik	TSS21717	chr4:140769870-140776029	-	-	1.16118	0.650218	1.67215	OK	1.17931	0.682668	1.67595	OK	1.66611	1.03976	2.29246	OK
6330549D23Rik	-	-	6330549D23Rik	6330549D23Rik	TSS2942	chr3:96405055-96433742	-	-	1.53697	1.06103	2.01291	OK	1.29359	0.86087	1.72632	OK	2.09707	1.41108	2.78306	OK
6330577E15Rik	-	-	6330577E15Rik	6330577E15Rik	TSS7405	chr19:47806245-47810078	-	-	22.2353	18.7441	25.7264	OK	14.2226	11.9745	16.4707	OK	38.2042	31.9819	44.4264	OK
6330578E17Rik	-	-	6330578E17Rik	6330578E17Rik	TSS20929	chr1:37473929-37486948	-	-	20.1169	16.8318	23.402	OK	16.3092	13.6331	18.9852	OK	16.4747	13.7439	19.2055	OK
6430411K18Rik	-	-	6430411K18Rik	6430411K18Rik	TSS8185	chr12:110828378-110833613	-	-	0	0	0	OK	0.44336	0.0865479	0.800172	OK	0	0	0	OK
6430527G18Rik	-	-	6430527G18Rik	6430527G18Rik	TSS23585	chr12:88221652-88225764	-	-	17.6475	14.791	20.5041	OK	14.6074	12.272	16.9428	OK	19.3855	16.2041	22.567	OK
6430531B16Rik	-	-	6430531B16Rik	6430531B16Rik	TSS12137	chr7:147158201-147164654	-	-	0.0877273	0.00938205	0.166072	OK	0.0890566	0.0144042	0.163709	OK	0.0558795	0.00136419	0.110395	OK
6430548M08Rik	-	-	6430548M08Rik	6430548M08Rik	TSS3463,TSS7676	chr8:122638051-122689207	-	-	22.3717	17.9239	26.8196	OK	15.0384	12.2365	17.8403	OK	70.913	45.0045	96.8214	OK
6430550D23Rik	-	-	6430550D23Rik	6430550D23Rik	TSS15957,TSS17677	chr2:155826178-155833713	-	-	0.197298	0.024171	0.370425	OK	0.25257	0.112956	0.392183	OK	0.143874	0.0581489	0.229598	OK
6430562O15Rik	-	-	6430562O15Rik	6430562O15Rik	TSS250	chr13:100114740-100185516	-	-	2.09065	1.37086	2.81044	OK	1.45065	0.923449	1.97785	OK	0.0707651	0	0.205666	OK
6430571L13Rik	-	-	6430571L13Rik	6430571L13Rik	TSS4980	chr9:107242970-107252014	-	-	1.45684	1.04579	1.86788	OK	1.15372	0.820895	1.48655	OK	1.26922	0.917446	1.621	OK
6430573F11Rik	-	-	6430573F11Rik	6430573F11Rik	TSS11254	chr8:37552244-37576067	-	-	4.07444	3.16884	4.98005	OK	4.4488	3.5576	5.34001	OK	0	0	0	OK
6430598A04Rik	-	-	6430598A04Rik	6430598A04Rik	TSS11259	chr5:138172190-138181226	-	-	0.38374	0.235481	0.531999	OK	1.24139	0.931366	1.55141	OK	1.12731	0.836861	1.41775	OK
6430704M03Rik	-	-	6430704M03Rik	6430704M03Rik	TSS19699	chr4:56973007-57003263	-	-	0.457116	0.291785	0.622447	OK	0.903084	0.664466	1.1417	OK	0	0	0	OK
6530401D17Rik	-	-	6530401D17Rik	6530401D17Rik	TSS779	chrX:132567905-132569485	-	-	5.76809	4.56282	6.97336	OK	4.10673	3.22582	4.98764	OK	1.90261	1.35787	2.44735	OK
6530401N04Rik	-	-	6530401N04Rik	6530401N04Rik	TSS4805	chr12:53098493-53107488	-	-	4.57534	3.70792	5.44277	OK	2.71412	2.15684	3.2714	OK	3.19212	2.56613	3.81811	OK
6530402F18Rik	-	-	6530402F18Rik	6530402F18Rik	TSS17790	chr2:29050340-29108513	-	-	0.0948053	0.0367095	0.152901	OK	0.294328	0.175281	0.413374	OK	0	0	0	OK
6530411M01Rik	-	-	6530411M01Rik	6530411M01Rik	TSS14077	chr17:9340583-9360887	-	-	0	0	0	OK	0.00501438	0	0.0187906	OK	0	0	0	OK
6530418L21Rik	-	-	6530418L21Rik	6530418L21Rik	TSS18337,TSS22926	chr3:105507516-105523760	-	-	0.323116	0.20192	0.444312	OK	0.45016	0.309101	0.591219	OK	1.53675	1.22792	1.84557	OK
6720401G13Rik	-	-	6720401G13Rik	6720401G13Rik	TSS7397	chrX:47908920-47988435	-	-	20.1445	16.0349	24.2541	OK	20.9763	17.1822	24.7705	OK	5.82348	4.8008	6.84617	OK
6720456B07Rik	-	-	6720456B07Rik	6720456B07Rik	TSS17431	chr6:113554765-113566945	-	-	44.073	37.1534	50.9926	OK	31.5156	26.5779	36.4534	OK	71.7494	59.9386	83.5602	OK
6720456H20Rik	-	-	6720456H20Rik	6720456H20Rik	TSS21618	chr14:49066026-49134834	-	-	5.88253	4.95333	6.81173	OK	5.79989	4.89295	6.70683	OK	2.20269	1.81109	2.59429	OK
6720463M24Rik	-	-	6720463M24Rik	6720463M24Rik	TSS20142	chr14:99445595-99473326	-	-	0.721579	0.45511	0.988048	OK	0.582147	0.368984	0.795309	OK	4.02006	3.25107	4.78905	OK
6720489N17Rik	-	-	6720489N17Rik	6720489N17Rik	TSS7969	chr13:62704374-62725542	-	-	0.585764	0.367285	0.804243	OK	0.511521	0.33624	0.686803	OK	1.01126	0.733242	1.28928	OK
6820408C15Rik	-	-	6820408C15Rik	6820408C15Rik	TSS20656	chr2:152241322-152270064	-	-	0.0790666	0.0153176	0.142816	OK	0.0621633	0.0118704	0.112456	OK	0	0	0	OK
6820431F20Rik	-	-	6820431F20Rik	6820431F20Rik	TSS22284,TSS8828	chr8:19863863-19893010	-	-	50.7808	42.313	59.2485	OK	41.575	34.1287	49.0213	OK	13.8668	12.0304	15.7032	OK
7420426K07Rik	-	-	7420426K07Rik	7420426K07Rik	TSS12107	chr9:98803537-98805041	-	-	0	0	0	OK	0	0	0	OK	0	0	0	OK
7420461P10Rik	-	-	7420461P10Rik	7420461P10Rik	TSS12117	chr1:164569280-164588350	-	-	0.00685232	0	0.0437852	OK	0.00838664	0	0.0400373	OK	0	0	0	OK
7530420F21Rik	-	-	7530420F21Rik	7530420F21Rik	TSS21949	chr1:151923790-151946896	-	-	0	0	0	OK	0	0	0	OK	0	0	0	OK
8030411F24Rik	-	-	8030411F24Rik	8030411F24Rik	TSS8032	chr2:148607744-148611672	-	-	0	0	0	OK	0	0	0	OK	0	0	0	OK
8030462N17Rik	-	-	8030462N17Rik	8030462N17Rik	TSS3216	chr18:77872019-77952749	-	-	6.26837	5.23655	7.30019	OK	5.26766	4.40938	6.12594	OK	3.02188	2.46833	3.57544	OK
8430406I07Rik	-	-	8430406I07Rik	8430406I07Rik	TSS19529	chr2:144096770-144106965	-	-	2.09803	1.5918	2.60425	OK	1.1354	0.823601	1.44719	OK	2.27327	1.78627	2.76028	OK
8430408G22Rik	-	-	8430408G22Rik	8430408G22Rik	TSS23818	chr6:116583025-116623854	-	-	5.36117	3.29593	7.4264	OK	18.7832	14.0335	23.5329	OK	0.174183	0	0.495409	OK
8430410A17Rik	-	-	8430410A17Rik	8430410A17Rik	TSS13377	chr6:87863969-87886607	-	-	10.9551	9.01091	12.8993	OK	7.79423	6.36279	9.22567	OK	30.4372	25.6553	35.219	OK
8430410K20Rik	-	-	8430410K20Rik	8430410K20Rik	TSS10227	chr9:4383536-4386869	-	-	12.9388	10.9031	14.9744	OK	8.97263	7.56064	10.3846	OK	11.4159	9.63119	13.2006	OK
8430419L09Rik	-	-	8430419L09Rik	8430419L09Rik	TSS9761	chr6:135148004-135186258	-	-	9.6515	8.14125	11.1617	OK	11.0872	9.33678	12.8377	OK	13.4347	11.2653	15.6041	OK
8430427H17Rik	-	-	8430427H17Rik	8430427H17Rik	TSS16376,TSS7588	chr2:153233196-153355707	-	-	5.59294	4.64587	6.54	OK	4.89187	4.07714	5.70659	OK	0.324023	0.212305	0.435741	OK
8430429K09Rik	-	-	8430429K09Rik	8430429K09Rik	TSS12939	chr11:3352439-3379834	-	-	0.848591	0.453194	1.24399	OK	0.493747	0.238872	0.748622	OK	0.374627	0.16158	0.587673	OK
8430431K14Rik	-	-	8430431K14Rik	8430431K14Rik	TSS18926	chr19:30642040-31839523	-	-	0.00747121	0	0.0535956	OK	0.0610948	0	0.174042	OK	0.0186137	0	0.0912554	OK
9030025P20Rik	-	-	9030025P20Rik	9030025P20Rik	TSS4028	chr17:15115827-15128541	-	-	1.01284	0.666152	1.35953	OK	1.27714	0.902497	1.65178	OK	1.50036	1.08534	1.91537	OK
9030224M15Rik	-	-	9030224M15Rik	9030224M15Rik	TSS10219	chr10:40403087-40530889	-	-	0.0419214	0	0.085754	OK	0.128331	0.0374861	0.219176	OK	0	0	0	OK
9030409G11Rik	-	-	9030409G11Rik	9030409G11Rik	TSS18880,TSS8904	chr4:141658304-141795316	-	-	3.36378	2.59431	4.13325	OK	4.63468	3.82748	5.44187	OK	0.843509	0.555284	1.13173	OK
9030418K01Rik	-	-	9030418K01Rik	9030418K01Rik	TSS21679	chr2:178149238-178156866	-	-	3.6542	2.88431	4.42409	OK	2.83689	2.23378	3.43999	OK	6.16735	5.11894	7.21575	OK
9030425E11Rik	-	-	9030425E11Rik	9030425E11Rik	TSS17361	chr9:40494046-40592129	-	-	0.162576	0.0742934	0.250859	OK	0.457222	0.291078	0.623366	OK	0	0	0	OK
9030612E09Rik	-	-	9030612E09Rik	9030612E09Rik	TSS4645	chr10:42894509-42896368	-	-	1.79717	1.26339	2.33095	OK	1.29126	0.888187	1.69434	OK	0.930688	0.605437	1.25594	OK
9030617O03Rik	-	-	9030617O03Rik	9030617O03Rik	TSS4145	chr12:102017332-102110820	-	-	1.45927	1.08535	1.83319	OK	1.46638	1.12006	1.8127	OK	0.60514	0.414116	0.796163	OK
9030619P08Rik	-	-	9030619P08Rik	9030619P08Rik	TSS23618	chr15:75258035-75262259	-	-	0	0	0	OK	0	0	0	OK	0	0	0	OK
9030624J02Rik	-	-	9030624J02Rik	9030624J02Rik	TSS13173	chr7:125883784-125985005	-	-	14.6249	12.3208	16.9289	OK	11.2853	9.51392	13.0566	OK	23.239	19.2211	27.257	OK
9030625A04Rik	-	-	9030625A04Rik	9030625A04Rik	TSS22408	chr14:77424007-77436424	-	-	3.21377	2.51753	3.91001	OK	2.56632	2.02026	3.11238	OK	5.6213	4.6649	6.5777	OK
9130008F23Rik	-	-	9130008F23Rik	9130008F23Rik	TSS3286	chr17:41012430-41017507	-	-	0.0202452	0	0.0458836	OK	0.112766	0.0427011	0.18283	OK	0	0	0	OK
9130011E15Rik	-	-	9130011E15Rik	9130011E15Rik	TSS22474	chr19:45892633-46072978	-	-	6.60309	5.49448	7.71169	OK	5.50834	4.59083	6.42585	OK	4.35528	3.60844	5.10212	OK
9130011J15Rik	-	-	9130011J15Rik	9130011J15Rik	TSS20898	chr8:75089096-75094947	-	-	22.8223	19.1794	26.4653	OK	16.5767	13.9531	19.2004	OK	20.4335	17.1237	23.7433	OK
9130017N09Rik	-	-	9130017N09Rik	9130017N09Rik	TSS22220	chr10:79283765-79293197	-	-	1.07444	0.736901	1.41198	OK	1.44213	1.05609	1.82817	OK	0	0	0	OK
9130019O22Rik	-	-	9130019O22Rik	9130019O22Rik	TSS2598	chr7:134525773-134530680	-	-	0.800096	0.5611	1.03909	OK	0.66993	0.470629	0.86923	OK	1.07853	0.81113	1.34594	OK
9130019P16Rik	-	-	9130019P16Rik	9130019P16Rik	TSS17528	chr6:53989925-54380215	-	-	0.00447913	0	0.0182483	OK	0.00267484	0	0.0136133	OK	0	0	0	OK
9130023H24Rik	-	-	9130023H24Rik	9130023H24Rik	TSS8245	chr7:135377964-135388614	-	-	5.40047	3.49811	7.30283	OK	4.55524	3.10638	6.0041	OK	3.87154	2.18156	5.56153	OK
9130024F11Rik	-	-	9130024F11Rik	9130024F11Rik	TSS22021	chr1:57028312-57032040	-	-	0.0222029	0.000782891	0.0436229	OK	0.0202091	0.00165678	0.0387614	OK	0.790804	0.433863	1.14775	OK
9130204L05Rik	-	-	9130204L05Rik	9130204L05Rik	TSS2661	chr3:90892058-90894727	-	-	0	0	0	OK	0	0	0	OK	0	0	0	OK
9130206I24Rik	-	-	9130206I24Rik	9130206I24Rik	TSS21545	chr4:114581893-114593723	-	-	0.00571629	0	0.0158579	OK	0.0277141	0.00353126	0.051897	OK	3.01276	2.42514	3.60038	OK
9130209A04Rik	-	-	9130209A04Rik	9130209A04Rik	TSS9779	chr18:47612321-47630522	-	-	0	0	0	OK	0	0	0	OK	0	0	0	OK
9130230L23Rik	-	-	9130230L23Rik	9130230L23Rik	TSS10648	chr5:66379166-66395524	-	-	0.752763	0.434722	1.0708	OK	0.406783	0.213046	0.600519	OK	0.0207127	0	0.0462263	OK
9130401M01Rik	-	-	9130401M01Rik	9130401M01Rik	TSS16618	chr15:57853826-57865849	-	-	6.7471	5.31016	8.18404	OK	4.63327	3.56011	5.70644	OK	14.006	11.6435	16.3686	OK
9130404H23Rik	-	-	9130404H23Rik	9130404H23Rik	TSS2131	chr17:66904591-66943962	-	-	0.0185864	0	0.044419	OK	0.00306626	0	0.0114903	OK	0	0	0	OK
9130409I23Rik	-	-	9130409I23Rik	9130409I23Rik	TSS21915	chr1:182981367-182990798	-	-	0.0267881	0	0.0572876	OK	0.00805417	0	0.0208295	OK	0	0	0	OK
9230102K24Rik	-	-	9230102K24Rik	9230102K24Rik	TSS23996	chr10:110037705-110053017	-	-	0	0	0	OK	0	0	0	OK	0	0	0	OK
9230104L09Rik	-	-	9230104L09Rik	9230104L09Rik	TSS5931	chr2:148672449-148676670	-	-	0	0	0	OK	0.00929138	0	0.034818	OK	0	0	0	OK
9230105E10Rik	-	-	9230105E10Rik	9230105E10Rik	TSS18933,TSS3763	chr7:111487267-111501872	-	-	0.484859	0.312186	0.657532	OK	0.903533	0.659352	1.14771	OK	0	0	0	OK
9230107M04Rik	-	-	9230107M04Rik	9230107M04Rik	TSS6960	chr7:14140214-14156416	-	-	0	0	0	OK	0	0	0	OK	0	0	0	OK
9230110C19Rik	-	-	9230110C19Rik	9230110C19Rik	TSS180	chr9:8021671-8042823	-	-	0.584039	0.323132	0.844945	OK	0.628017	0.379306	0.876728	OK	0	0	0	OK
9230110F15Rik	-	-	9230110F15Rik	9230110F15Rik	TSS632	chr9:35645913-35651735	-	-	0	0	0	OK	0.00465991	0	0.0174623	OK	0	0	0	OK
9230113P08Rik	-	-	9230113P08Rik	9230113P08Rik	TSS14675	chr9:35716007-35718381	-	-	0	0	0	OK	0	0	0	OK	0	0	0	OK
9230114K14Rik	-	-	9230114K14Rik	9230114K14Rik	TSS8101	chr5:52581919-52589223	-	-	1.46696	1.02728	1.90664	OK	1.22549	0.880126	1.57085	OK	0.768879	0.513186	1.02457	OK
9230115E21Rik	-	-	9230115E21Rik	9230115E21Rik	TSS7721	chr9:51573456-51683990	-	-	0	0	0	OK	0	0	0	OK	0.137204	0	0.283732	OK
9230116N13Rik	-	-	9230116N13Rik	9230116N13Rik	TSS2098	chr1:138308492-138336797	-	-	0.454923	0.180426	0.72942	OK	0.47495	0.224238	0.725661	OK	0.179855	0.0179524	0.341757	OK
9330020H09Rik	-	-	9330020H09Rik	9330020H09Rik	TSS574	chr15:98373641-98401295	-	-	0.952529	0.513578	1.39148	OK	0.646649	0.313246	0.980052	OK	0.915644	0.547529	1.28376	OK
9330111N05Rik	-	-	9330111N05Rik	9330111N05Rik	TSS18484	chr13:81103334-81218856	-	-	0.0131434	0	0.036564	OK	0.00390732	0	0.014642	OK	0	0	0	OK
9330129D05Rik	-	-	9330129D05Rik	9330129D05Rik	TSS5502	chr5:122048289-122068947	-	-	3.32447	2.60476	4.04419	OK	2.47437	1.9079	3.04084	OK	0.181498	0.0843528	0.278644	OK
9330133O14Rik	-	-	9330133O14Rik	9330133O14Rik	TSS1166	chr8:124969167-124975222	-	-	0.99054	0.650187	1.33089	OK	0.71665	0.461279	0.972021	OK	0.663928	0.427606	0.900251	OK
9330151L19Rik	-	-	9330151L19Rik	9330151L19Rik	TSS6197	chr12:70290824-70300855	-	-	5.59063	4.4652	6.71607	OK	5.63166	4.57216	6.69116	OK	2.51326	1.74519	3.28133	OK
9330158H04Rik	-	-	9330158H04Rik	9330158H04Rik	TSS9139	chr6:36283137-36338234	-	-	0	0	0	OK	0.00622764	0	0.0147824	OK	0	0	0	OK
9330159F19Rik	-	-	9330159F19Rik	9330159F19Rik	TSS18521	chr10:28931448-28950585	-	-	2.88971	2.39213	3.38728	OK	2.31655	1.92912	2.70399	OK	1.63168	1.33233	1.93103	OK
9330175E14Rik	-	-	9330175E14Rik	9330175E14Rik	TSS155	chr8:96957026-96959003	-	-	0.00321491	0	0.0137702	OK	0.0155366	0	0.0368787	OK	0	0	0	OK
9330176C04Rik	-	-	9330176C04Rik	9330176C04Rik	TSS2394	chr9:119129608-119140810	-	-	0.12621	0.0328564	0.219563	OK	0.203752	0.0795047	0.328	OK	0.109103	0.0297378	0.188468	OK
9330182L06Rik	-	-	9330182L06Rik	9330182L06Rik	TSS12345	chr5:9266192-9480717	-	-	18.2032	15.1309	21.2755	OK	16.0334	13.2375	18.8293	OK	13.4205	11.17	15.671	OK
9430007A20Rik	-	-	9430007A20Rik	9430007A20Rik	TSS7355	chr4:144109724-144119256	-	-	0	0	0	OK	0	0	0	OK	0	0	0	OK
9430008C03Rik	-	-	9430008C03Rik	9430008C03Rik	TSS19263,TSS4125	chr2:158179435-158187258	-	-	1.58932	1.08833	2.09031	OK	1.40649	0.998895	1.81409	OK	2.06666	1.57348	2.55983	OK
9430015G10Rik	-	-	9430015G10Rik	9430015G10Rik	TSS1008	chr4:155484106-155501372	-	-	1.73153	1.22094	2.24212	OK	1.30556	0.956532	1.65458	OK	4.77483	3.86238	5.68727	OK
9430016H08Rik	-	-	9430016H08Rik	9430016H08Rik	TSS1631	chr1:57445087-57472802	-	-	4.56451	3.34496	5.78406	OK	3.83635	2.80936	4.86334	OK	7.26954	5.71542	8.82366	OK
9430020K01Rik	-	-	9430020K01Rik	9430020K01Rik	TSS21906	chr18:4634926-4682867	-	-	0.022256	0.00504203	0.0394699	OK	1.27011	1.02983	1.51039	OK	0	0	0	OK
9430021M05Rik	-	-	9430021M05Rik	9430021M05Rik	TSS15003	chr2:162486898-162500940	-	-	0.813196	0.519129	1.10726	OK	1.22174	0.866102	1.57738	OK	0.0630684	0.0171904	0.108946	OK
9430023L20Rik	-	-	9430023L20Rik	9430023L20Rik	TSS13357	chr15:101114731-101121365	-	-	6.27125	4.86131	7.6812	OK	4.21121	3.1508	5.27163	OK	10.678	8.72049	12.6355	OK
9430031J16Rik	-	-	9430031J16Rik	9430031J16Rik	TSS6799	chr1:81073891-81268226	-	-	0.159805	0.087042	0.232569	OK	0.18724	0.113805	0.260674	OK	0.0101597	0.000248028	0.0200713	OK
9430038I01Rik	-	-	9430038I01Rik	9430038I01Rik	TSS10856	chr7:144567251-144602439	-	-	0.977887	0.557851	1.39792	OK	0.572113	0.300436	0.843789	OK	1.68339	1.10845	2.25833	OK
9430041J12Rik	-	-	9430041J12Rik	9430041J12Rik	TSS215	chr7:4025726-4088528	-	-	0.0266333	0	0.0997774	OK	0.0422396	0	0.118219	OK	0.158517	0	1.77099	OK
9430060I03Rik	-	-	9430060I03Rik	9430060I03Rik	TSS1725	chr1:94830119-94847167	-	-	0.225767	0	0.547262	OK	0.383594	0.0215315	0.745656	OK	0.189885	0	0.508772	OK
9430070O13Rik	-	-	9430070O13Rik	9430070O13Rik	TSS14141	chr1:158295059-158330121	-	-	0.0183692	0	0.0417274	OK	0.0046796	0	0.0137705	OK	0	0	0	OK
9430076C15Rik	-	-	9430076C15Rik	9430076C15Rik	TSS8701	chr6:53237288-53347210	-	-	0	0	0	OK	0.00860786	0	0.0194407	OK	0	0	0	OK
9430083A17Rik	-	-	9430083A17Rik	9430083A17Rik	TSS8099	chr13:51193106-51196096	-	-	0.546851	0.343019	0.750682	OK	0.594193	0.396257	0.79213	OK	0.097758	0.0404976	0.155018	OK
9530002B09Rik	-	-	9530002B09Rik	9530002B09Rik	TSS18738	chr4:122366501-122382378	-	-	0.00996265	0	0.0368147	OK	0	0	0	OK	0	0	0	OK
9530003J23Rik	-	-	9530003J23Rik	9530003J23Rik	TSS6373	chr10:116670808-116675737	-	-	0	0	0	OK	0	0	0	OK	0	0	0	OK
9530008L14Rik	-	-	9530008L14Rik	9530008L14Rik	TSS12623,TSS18188	chr13:41858516-41942985	-	-	0.200839	0.0912775	0.310401	OK	0.171226	0.0827458	0.259706	OK	0	0	0	OK
9530009M10Rik	-	-	9530009M10Rik	9530009M10Rik	TSS15340	chr1:136662519-136852517	-	-	0.283121	0.0813303	0.484911	OK	0.77455	0.463211	1.08589	OK	0.105664	0.0104984	0.200829	OK
9530026P05Rik	-	-	9530026P05Rik	9530026P05Rik	TSS13455	chr6:92890575-93061743	-	-	0	0	0	OK	0.173781	0.0520641	0.295498	OK	0	0	0	OK
9530036O11Rik	-	-	9530036O11Rik	9530036O11Rik	TSS24021	chr5:28783379-29045749	-	-	0.0614978	0.0153566	0.107639	OK	0.0309663	0.00419707	0.0577355	OK	0.025937	0.00298331	0.0488907	OK
9530053A07Rik	-	-	9530053A07Rik	9530053A07Rik	TSS15749	chr7:28914484-28949830	-	-	0.0667823	0.0323156	0.101249	OK	0.0753946	0.0396215	0.111168	OK	0.0206972	0.00647891	0.0349154	OK
9530059O14Rik	-	-	9530059O14Rik	9530059O14Rik	TSS21299	chr9:122481618-122489765	-	-	0	0	0	OK	0.00647415	0	0.0146217	OK	0	0	0	OK
9530068E07Rik	-	-	9530068E07Rik	9530068E07Rik	TSS22683	chr11:52209929-52222225	-	-	70.6726	56.8195	84.5257	OK	55.211	44.4761	65.9459	OK	46.4897	37.7938	55.1855	OK
9530077C05Rik	-	-	9530077C05Rik	9530077C05Rik	TSS14175	chr9:22216020-22249123	-	-	2.62466	1.9865	3.26282	OK	1.92733	1.45055	2.40412	OK	3.68831	2.96015	4.41647	OK
9530082P21Rik	-	-	9530082P21Rik	9530082P21Rik	TSS3838	chr17:23886202-23891032	-	-	4.30787	3.52902	5.08673	OK	3.81659	3.13633	4.49685	OK	12.1383	10.2362	14.0404	OK
9530091C08Rik	-	-	9530091C08Rik	9530091C08Rik	TSS9601	chr9:68501608-69226835	-	-	0.884487	0.632973	1.136	OK	1.39828	1.07092	1.72563	OK	0.1353	0.0664852	0.204114	OK
9630013A20Rik	-	-	9630013A20Rik	9630013A20Rik	TSS14407	chr14:84843369-84936867	-	-	0	0	0	OK	0.00226724	0	0.0214	OK	0	0	0	OK
9630028H03Rik	-	-	9630028H03Rik	9630028H03Rik	TSS11419	chr2:135406265-135408956	-	-	0	0	0	OK	0	0	0	OK	0	0	0	OK
9630033F20Rik	-	-	9630033F20Rik	9630033F20Rik	TSS13761	chr6:127035133-127059570	-	-	8.48778	7.14998	9.82559	OK	6.44913	5.42958	7.46869	OK	17.1889	14.3649	20.0129	OK
9830001H06Rik	-	-	9830001H06Rik	9830001H06Rik	TSS14598	chr2:156836177-156905001	-	-	10.0018	8.14921	11.8544	OK	12.8158	10.1349	15.4967	OK	13.1084	10.3172	15.8996	OK
9830107B12Rik	-	-	9830107B12Rik	9830107B12Rik	TSS7590	chr17:48262554-48283257	-	-	0	0	0	OK	0	0	0	OK	0	0	0	OK
9930012K11Rik	-	-	9930012K11Rik	9930012K11Rik	TSS3633	chr14:70554211-70559309	-	-	0.149508	0.0544301	0.244585	OK	0.230103	0.110192	0.350013	OK	1.24264	0.825881	1.65941	OK
9930013L23Rik	-	-	9930013L23Rik	9930013L23Rik	TSS20408	chr7:91081366-91235015	-	-	0.0227237	0.00579588	0.0396515	OK	0.0789217	0.0414446	0.116399	OK	0.0644314	0.0323942	0.0964686	OK
9930014A18Rik	-	-	9930014A18Rik	9930014A18Rik	TSS11204	chr15:60650550-60662955	-	-	0.424087	0.0397554	0.808419	OK	0.377213	0.0869472	0.667478	OK	0.00763145	0	0.0273571	OK
9930021D14Rik	-	-	9930021D14Rik	9930021D14Rik	TSS125	chr17:24610495-24616023	-	-	0.00749208	0	0.0744167	OK	0.0408106	0	0.289374	OK	0.0629107	0	0.599884	OK
9930021J03Rik	-	-	9930021J03Rik	9930021J03Rik	TSS12776	chr19:29788891-29880499	-	-	9.18656	7.68547	10.6877	OK	8.87279	7.35119	10.3944	OK	1.91317	1.60108	2.22526	OK
9930023K05Rik	-	-	9930023K05Rik	9930023K05Rik	TSS2433	chr19:56536126-56561219	-	-	0.00534165	0	0.0267003	OK	0.0918304	0.0178642	0.165797	OK	0	0	0	OK
9930032O22Rik	-	-	9930032O22Rik	9930032O22Rik	TSS13818	chr5:86914901-86947625	-	-	0	0	0	OK	0	0	0	OK	0	0	0	OK
9930104L06Rik	-	-	9930104L06Rik	9930104L06Rik	TSS16016	chr4:124614291-124621905	-	-	3.11276	2.4746	3.75091	OK	2.42446	1.9195	2.92941	OK	3.64114	2.97312	4.30915	OK
9930111J21Rik1	-	-	9930111J21Rik1	9930111J21Rik1	TSS8877	chr11:48759651-48792900	-	-	0.0385031	0.00789129	0.0691148	OK	0.682927	0.487136	0.878718	OK	0	0	0	OK
9930111J21Rik2	-	-	9930111J21Rik2	9930111J21Rik2	TSS15150,TSS6153	chr11:48759651-48792900	-	-	0.0212948	0	0.0619454	OK	0.315417	0.124361	0.506474	OK	0	0	0	OK
A030009H04Rik	-	-	A030009H04Rik	A030009H04Rik	TSS16846	chr11:69154270-69156149	-	-	5.47728	4.35433	6.60023	OK	3.81392	3.00795	4.6199	OK	3.04023	2.33076	3.7497	OK
A130010J15Rik	-	-	A130010J15Rik	A130010J15Rik	TSS10633,TSS6734	chr1:194999662-195027740	-	-	2.55621	2.02348	3.08894	OK	2.03744	1.62059	2.45429	OK	1.60138	1.25776	1.94499	OK
A130022J15Rik	-	-	A130022J15Rik	A130022J15Rik	TSS19051	chr6:97060937-97098877	-	-	3.6218	2.93704	4.30656	OK	4.50235	3.74569	5.25902	OK	4.82768	4.03439	5.62097	OK
A130040M12Rik	-	-	A130040M12Rik	A130040M12Rik	TSS2964	chr13:62184506-62397849	-	-	0.364116	0.174437	0.553796	OK	0.937619	0.647365	1.22787	OK	0.166048	0.0621395	0.269957	OK
A130049A11Rik	-	-	A130049A11Rik	A130049A11Rik	TSS5278	chr3:103718042-103811414	-	-	0.330707	0	0.732338	OK	0.333623	0	0.712226	OK	0.459494	0.0730602	0.845928	OK
A1bg	-	-	A1bg	A1bg	TSS19027	chr15:60749143-60752825	-	-	0	0	0	OK	0	0	0	OK	0	0	0	OK
A1cf	-	-	A1cf	A1cf	TSS17627	chr19:31943250-32023896	-	-	2.70537	2.1808	3.22994	OK	5.43429	4.57398	6.29459	OK	0	0	0	OK
A230020J21Rik	-	-	A230020J21Rik	A230020J21Rik	TSS13032	chr1:192829710-192853660	-	-	0.137295	0	0.409205	OK	0.230618	0	0.520242	OK	0.193689	0	0.552091	OK
A230046K03Rik	-	-	A230046K03Rik	A230046K03Rik	TSS3642	chr10:83006685-83059218	-	-	5.81238	4.89848	6.72628	OK	5.32082	4.4887	6.15293	OK	3.26885	2.74628	3.79142	OK
A230050P20Rik	-	-	A230050P20Rik	A230050P20Rik	TSS7565	chr9:20673085-20684154	-	-	28.9046	24.1845	33.6247	OK	19.9952	16.7621	23.2283	OK	5.42757	4.27505	6.5801	OK
A230051G13Rik	-	-	A230051G13Rik	A230051G13Rik	TSS9683	chr11:58968870-58977244	-	-	2.18454	1.73103	2.63806	OK	1.79655	1.41484	2.17827	OK	1.48749	1.1544	1.82059	OK
A230056P14Rik	-	-	A230056P14Rik	A230056P14Rik	TSS16147	chr7:63217900-63274943	-	-	1.38211	0.682505	2.08171	OK	0.866486	0.386705	1.34627	OK	0.473836	0.101994	0.845678	OK
A230057D06Rik	-	-	A230057D06Rik	A230057D06Rik	TSS9771	chr7:68850735-69072460	-	-	9.10396	7.56043	10.6475	OK	11.5528	9.72521	13.3804	OK	1.25601	0.887989	1.62403	OK
A230065H16Rik	-	-	A230065H16Rik	A230065H16Rik	TSS12490	chr12:112645019-112650288	-	-	0.0170481	0	0.0569231	OK	0	0	0	OK	0	0	0	OK
A230072C01Rik	-	-	A230072C01Rik	A230072C01Rik	TSS2567,TSS5732	chrX:20528790-20564475	-	-	1.33668	0.850915	1.82245	OK	1.52141	1.03272	2.01011	OK	1.14799	0.709385	1.5866	OK
A230072E10Rik	-	-	A230072E10Rik	A230072E10Rik	TSS4177	chrX:147747877-147776422	-	-	0.429572	0.264785	0.594359	OK	0.616627	0.426428	0.806825	OK	0.285554	0.173878	0.397229	OK
A230073K19Rik	-	-	A230073K19Rik	A230073K19Rik	TSS19577	chr7:66484119-66562097	-	-	0.134493	0	0.345119	OK	0.134585	0	0.316992	OK	0.0651828	0	0.138438	OK
A2ld1	-	-	A2ld1	A2ld1	TSS20332	chr14:123290081-123312387	-	-	63.111	52.9973	73.2248	OK	35.1055	29.6178	40.5932	OK	34.1581	28.8186	39.4976	OK
A2m	-	-	A2m	A2m	TSS19932	chr6:121586190-121629256	-	-	0.0149134	0	0.0303947	OK	0.007752	0	0.0164449	OK	0	0	0	OK
A330021E22Rik	-	-	A330021E22Rik	A330021E22Rik	TSS16260	chr5:5580981-5664232	-	-	1.65313	1.24446	2.06179	OK	1.7543	1.37715	2.13145	OK	0	0	0	OK
A330023F24Rik	-	-	A330023F24Rik	A330023F24Rik	TSS11160	chr1:196843592-196864102	-	-	2.93655	2.42027	3.45282	OK	5.17692	4.3616	5.99224	OK	1.18631	0.937864	1.43476	OK
A330035P11Rik	-	-	A330035P11Rik	A330035P11Rik	TSS17335	chr14:122497160-122506196	-	-	1.72011	1.27356	2.16666	OK	1.27413	0.94151	1.60675	OK	0.339629	0.202002	0.477257	OK
A330040F15Rik	-	-	A330040F15Rik	A330040F15Rik	TSS23494	chr19:12648014-12671056	-	-	0.966879	0.47006	1.4637	OK	0.779024	0.338171	1.21988	OK	0.231797	0	0.875699	OK
A330049M08Rik	-	-	A330049M08Rik	A330049M08Rik	TSS16641,TSS7162	chr4:134925491-134954142	-	-	1.69285	1.11034	2.27536	OK	1.46453	0.959049	1.97002	OK	2.07912	1.52089	2.63735	OK
A330050B17Rik	-	-	A330050B17Rik	A330050B17Rik	TSS14216	chr3:35858230-35952469	-	-	0.0356439	0	0.0986757	OK	0.035256	0	0.0909671	OK	0.0180409	0	0.0559842	OK
A330050F15Rik	-	-	A330050F15Rik	A330050F15Rik	TSS16392	chr17:69788665-69838573	-	-	5.12224	4.14661	6.09787	OK	3.57657	2.86892	4.28421	OK	9.06343	7.60973	10.5171	OK
A330069E16Rik	-	-	A330069E16Rik	A330069E16Rik	TSS14308	chr2:91077302-91078514	-	-	0.423642	0.16751	0.679774	OK	0.41519	0.183275	0.647105	OK	1.0996	0.630765	1.56843	OK
A330076H08Rik	-	-	A330076H08Rik	A330076H08Rik	TSS10537	chr7:69088786-69127245	-	-	34.1817	28.6771	39.6863	OK	30.1088	25.0918	35.1258	OK	1.36399	0.960753	1.76723	OK
A3galt2	-	-	A3galt2	A3galt2	TSS5948	chr4:128436501-128446542	-	-	0.28207	0.159234	0.404906	OK	0.348238	0.213564	0.482912	OK	0.158216	0.0809183	0.235514	OK
A430005L14Rik	-	-	A430005L14Rik	A430005L14Rik	TSS7446	chr4:153331345-153336033	-	-	9.50071	7.57925	11.4222	OK	6.3227	4.93102	7.71439	OK	20.3265	16.9239	23.7291	OK
A430033K04Rik	-	-	A430033K04Rik	A430033K04Rik	TSS9009	chr5:139064086-139090054	-	-	4.84489	3.99656	5.69322	OK	3.58682	2.95836	4.21529	OK	2.97835	2.43429	3.52241	OK
A430078G23Rik	-	-	A430078G23Rik	A430078G23Rik	TSS24055	chr8:3353414-3390299	-	-	0.0197994	0	0.0421797	OK	0.0265872	0.00286621	0.0503082	OK	0	0	0	OK
A430084P05Rik	-	-	A430084P05Rik	A430084P05Rik	TSS4273	chr11:70604433-70626063	-	-	0.0143946	0	0.0419541	OK	0.294428	0.122781	0.466076	OK	0	0	0	OK
A430089I19Rik	-	-	A430089I19Rik	A430089I19Rik	TSS14126,TSS18348,TSS9760	chr5:94731543-94735821	-	-	0.00261148	0	0.0113154	OK	0	0	0	OK	0	0	0	OK
A430093F15Rik	-	-	A430093F15Rik	A430093F15Rik	TSS6049	chr19:10815436-10860533	-	-	0.00459128	0	0.0153302	OK	0.00536713	0	0.0157937	OK	0.0141213	0	0.0315157	OK
A430105I19Rik	-	-	A430105I19Rik	A430105I19Rik	TSS8480	chr2:118579880-118588397	-	-	9.21683	7.77347	10.6602	OK	7.31543	6.17149	8.45937	OK	4.21793	3.5427	4.89317	OK
A430107O13Rik	-	-	A430107O13Rik	A430107O13Rik	TSS23980	chr6:21935909-22205606	-	-	0.26199	0.158372	0.365608	OK	0.686394	0.506525	0.866263	OK	0	0	0	OK
A430110N23Rik	-	-	A430110N23Rik	A430110N23Rik	TSS20780	chr7:4877445-4896399	-	-	0.110474	0.0518207	0.169127	OK	0.224301	0.133163	0.31544	OK	0.112427	0.0574997	0.167354	OK
A4galt	-	-	A4galt	A4galt	TSS17847,TSS7398	chr15:83057151-83082204	-	-	0.0321007	0	0.0681602	OK	0.286667	0.151651	0.421683	OK	0	0	0	OK
A4gnt	-	-	A4gnt	A4gnt	TSS15829	chr9:99512920-99522786	-	-	0.00169741	0	0.00735482	OK	0	0	0	OK	0	0	0	OK
A530013C23Rik	-	-	A530013C23Rik	A530013C23Rik	TSS12228	chr2:167516707-167522913	-	-	0.00671663	0	0.0195761	OK	0.00550087	0	0.0161872	OK	0.0138256	0	0.0308559	OK
A530016L24Rik	-	-	A530016L24Rik	A530016L24Rik	TSS20056	chr12:113727658-113738138	-	-	0	0	0	OK	0.00435076	0	0.0128028	OK	0.0667689	0.0209009	0.112637	OK
A530023O14Rik	-	-	A530023O14Rik	A530023O14Rik	TSS3745	chr7:111503911-111507160	-	-	0.00932242	0	0.0235757	OK	0.0124172	0	0.0263414	OK	0	0	0	OK
A530032D15Rik	-	-	A530032D15Rik	A530032D15Rik	TSS15874	chr1:85084713-85106428	-	-	0.00565289	0	0.0188073	OK	0.0047747	0	0.0152405	OK	0.784943	0.50311	1.06677	OK
A530053G22Rik	-	-	A530053G22Rik	A530053G22Rik	TSS23978	chr6:60229036-60353701	-	-	0	0	0	OK	0	0	0	OK	0	0	0	OK
A530054K11Rik	-	-	A530054K11Rik	A530054K11Rik	TSS21767	chr13:67717937-67738690	-	-	3.1583	2.61546	3.70114	OK	2.99244	2.50678	3.47809	OK	1.1205	0.889501	1.35149	OK
A530058N18Rik	-	-	A530058N18Rik	A530058N18Rik	TSS2440	chr2:113835336-113858028	-	-	19.1259	6.20439	32.0474	OK	12.6695	4.96389	20.3751	OK	7.23404	4.7927	9.67538	OK
A530064D06Rik	-	-	A530064D06Rik	A530064D06Rik	TSS4818	chr17:48288845-48304207	-	-	0.00498333	0	0.0260289	OK	0.0159498	0	0.0393195	OK	0	0	0	OK
A530088E08Rik	-	-	A530088E08Rik	A530088E08Rik	TSS12526	chr17:32527605-32541753	-	-	0.0799568	0	0.200803	OK	0.100431	0	0.218763	OK	0	0	0	OK
A530098C11Rik	-	-	A530098C11Rik	A530098C11Rik	TSS23162	chr1:44066252-44076851	-	-	0.0140386	0	0.0407823	OK	0.0419353	0	0.0868955	OK	0	0	0	OK
A530099J19Rik	-	-	A530099J19Rik	A530099J19Rik	TSS23643	chr13:19819285-19824820	-	-	0.00513455	0	0.0155076	OK	0.0156249	0	0.0317323	OK	0	0	0	OK
A630001G21Rik	-	-	A630001G21Rik	A630001G21Rik	TSS12257	chr1:87613657-87633181	-	-	0.0112176	0	0.0294525	OK	0.0652775	0.0168596	0.113695	OK	0	0	0	OK
A630007B06Rik	-	-	A630007B06Rik	A630007B06Rik	TSS6503	chr19:56865452-56888173	-	-	11.2364	9.46132	13.0116	OK	9.02928	7.61426	10.4443	OK	3.51627	2.87116	4.16138	OK
A630010A05Rik	-	-	A630010A05Rik	A630010A05Rik	TSS5802	chr16:14562409-14621377	-	-	0	0	0	OK	0	0	0	OK	0	0	0	OK
A630033H20Rik	-	-	A630033H20Rik	A630033H20Rik	TSS12260,TSS14048,TSS5057	chrX:104344265-104369000	-	-	0.00817759	0	0.0230387	OK	0.117007	0.0546889	0.179325	OK	0	0	0	OK
A630055G03Rik	-	-	A630055G03Rik	A630055G03Rik	TSS7966	chr16:10835151-10843328	-	-	0.19469	0.102651	0.28673	OK	0.164968	0.0883813	0.241554	OK	3.41953	2.82756	4.01149	OK
A630066F11Rik	-	-	A630066F11Rik	A630066F11Rik	TSS8000	chr10:7350033-7384421	-	-	3.38349	1.8082	4.95878	OK	2.17961	1.08708	3.27215	OK	2.40738	0.768247	4.04651	OK
A630072M18Rik	-	-	A630072M18Rik	A630072M18Rik	TSS18273	chr5:20398841-20462216	-	-	0.365044	0.125024	0.605065	OK	0.525948	0.238366	0.813531	OK	0.269863	0.131833	0.407892	OK
A630073D07Rik	-	-	A630073D07Rik	A630073D07Rik	TSS21996	chr6:132575128-132577529	-	-	0	0	0	OK	0	0	0	OK	0	0	0	OK
A630075F10Rik	-	-	A630075F10Rik	A630075F10Rik	TSS11240,TSS19285	chr2:169886739-169896278	-	-	0.0459426	0.000363303	0.0915219	OK	0.078154	0.0184604	0.137848	OK	0	0	0	OK
A630089N07Rik	-	-	A630089N07Rik	A630089N07Rik	TSS13846	chr16:98283676-98303604	-	-	0.324079	0.170679	0.477479	OK	0.491308	0.311408	0.671209	OK	0.213903	0.111124	0.316683	OK
A630095E13Rik	-	-	A630095E13Rik	A630095E13Rik	TSS3309	chr9:36443338-36446187	-	-	0	0	0	OK	0	0	0	OK	0.120199	0.00293443	0.237464	OK
A730008H23Rik	-	-	A730008H23Rik	A730008H23Rik	TSS5719	chr1:90123594-90174154	-	-	9.20275	6.10683	12.2987	OK	7.60635	5.01779	10.1949	OK	35.0787	11.6244	58.5331	OK
A730011L01Rik	-	-	A730011L01Rik	A730011L01Rik	TSS10252,TSS6272	chr11:119352660-119372779	-	-	5.48143	4.51328	6.44958	OK	4.81779	4.07427	5.56132	OK	4.84948	4.06148	5.63747	OK
A730017C20Rik	-	-	A730017C20Rik	A730017C20Rik	TSS17162	chr18:59222034-59236614	-	-	0.350857	0.134611	0.567103	OK	0.638623	0.35888	0.918366	OK	5.71649	4.58604	6.84694	OK
A730017L22Rik	-	-	A730017L22Rik	A730017L22Rik	TSS18799	chr2:130698276-130732132	-	-	3.09999	2.4168	3.78318	OK	2.51291	1.9641	3.06172	OK	0.903583	0.625567	1.1816	OK
A730018C14Rik	-	-	A730018C14Rik	A730018C14Rik	TSS3974	chr12:113649233-113661409	-	-	0	0	0	OK	0	0	0	OK	0	0	0	OK
A730020M07Rik	-	-	A730020M07Rik	A730020M07Rik	TSS1612,TSS9313	chr3:121337855-121349371	-	-	0.0038135	0	0.014245	OK	0.0141057	0	0.0440898	OK	0	0	0	OK
A730037C10Rik	-	-	A730037C10Rik	A730037C10Rik	TSS9350	chr3:54943959-54976857	-	-	0.147349	0.0579097	0.236789	OK	0.133723	0.0586521	0.208793	OK	0.0959175	0.0356942	0.156141	OK
A730069N07Rik	-	-	A730069N07Rik	A730069N07Rik	TSS10660	chr8:37630792-38015490	-	-	0.174637	0.0270498	0.322224	OK	0.166812	0	0.358454	OK	0	0	0	OK
A830007P12Rik	-	-	A830007P12Rik	A830007P12Rik	TSS18233	chr2:25048239-25052333	-	-	8.17594	6.8749	9.47699	OK	6.9949	5.88355	8.10626	OK	0.0336392	0.00738327	0.0598952	OK
A830010M20Rik	-	-	A830010M20Rik	A830010M20Rik	TSS13808,TSS3088	chr5:107926763-107941575	-	-	3.96047	3.32835	4.59259	OK	2.70172	2.26997	3.13347	OK	2.80132	2.35443	3.24821	OK
A830018L16Rik	-	-	A830018L16Rik	A830018L16Rik	TSS18339	chr1:11404185-11965983	-	-	0.472019	0.244917	0.699121	OK	0.329571	0.183111	0.47603	OK	0	0	0	OK
A830080D01Rik	-	-	A830080D01Rik	A830080D01Rik	TSS15107	chrX:155970599-156031013	-	-	3.09405	2.49135	3.69674	OK	2.33709	1.89737	2.77681	OK	0.993794	0.737747	1.24984	OK
A830082N09Rik	-	-	A830082N09Rik	A830082N09Rik	TSS12508	chr10:33707232-33709101	-	-	0.523817	0.271737	0.775896	OK	0.610488	0.35879	0.862186	OK	0.311209	0.150386	0.472032	OK
A830093I24Rik	-	-	A830093I24Rik	A830093I24Rik	TSS18682	chr12:4753021-4776073	-	-	0.262747	0.138591	0.386903	OK	0.300571	0.176649	0.424493	OK	0	0	0	OK
A930001N09Rik	-	-	A930001N09Rik	A930001N09Rik	TSS21044	chr17:26852594-26913571	-	-	11.8819	9.89042	13.8733	OK	11.487	9.4383	13.5357	OK	1.75846	1.46161	2.05531	OK
A930003A15Rik	-	-	A930003A15Rik	A930003A15Rik	TSS17455	chr16:19876660-19884367	-	-	0.0784824	0	0.223401	OK	0.0528473	0	0.114741	OK	0.143663	0.0377262	0.2496	OK
A930003O13Rik	-	-	A930003O13Rik	A930003O13Rik	TSS4884	chr5:22244728-22781415	-	-	0.0445663	0	0.0892369	OK	0.0888059	0.0190694	0.158542	OK	0	0	0	OK
A930004D18Rik	-	-	A930004D18Rik	A930004D18Rik	TSS17178	chr2:17946815-17959368	-	-	0.267828	0.126313	0.409342	OK	0.410216	0.231189	0.589242	OK	1.91213	1.42509	2.39917	OK
A930005H10Rik	-	-	A930005H10Rik	A930005H10Rik	TSS18179,TSS5395,TSS8949	chr3:115584496-115591048	-	-	3.95208	2.29574	5.60842	OK	3.22095	1.84714	4.59477	OK	2.85559	1.59784	4.11335	OK
A930005I04Rik	-	-	A930005I04Rik	A930005I04Rik	TSS18533	chr5:35258563-35266488	-	-	0.423999	0.251717	0.596281	OK	0.373419	0.224299	0.52254	OK	0.235538	0.128829	0.342247	OK
A930007I19Rik	-	-	A930007I19Rik	A930007I19Rik	TSS13614	chr19:29578152-29596477	-	-	0.0891465	0.0265563	0.151737	OK	0.128451	0.0552056	0.201696	OK	0.0343114	0.00496005	0.0636627	OK
A930011G23Rik	-	-	A930011G23Rik	A930011G23Rik	TSS672	chr5:99726262-100158079	-	-	0.234863	0.127186	0.34254	OK	0.139364	0.0711146	0.207614	OK	0.17586	0.0961876	0.255532	OK
A930012L18Rik	-	-	A930012L18Rik	A930012L18Rik	TSS20231	chr18:44584713-44971836	-	-	0.452917	0	0.933659	OK	0.482251	0.00208927	0.962413	OK	0.210094	0	0.421123	OK
A930013F10Rik	-	-	A930013F10Rik	A930013F10Rik	TSS3423	chr8:23738590-23763909	-	-	1.43671	0.921471	1.95194	OK	1.8344	1.3228	2.34601	OK	0.683235	0.39963	0.96684	OK
A930015D03Rik	-	-	A930015D03Rik	A930015D03Rik	TSS16869	chr17:36131448-36175119	-	-	1.4314	0.42861	2.43419	OK	0.888814	0.111031	1.6666	OK	1.83856	1.01209	2.66502	OK
A930017M01Rik	-	-	A930017M01Rik	A930017M01Rik	TSS17255	chr15:44712939-44716289	-	-	0.883916	0.616191	1.15164	OK	0.750322	0.530987	0.969658	OK	0.803065	0.577456	1.02867	OK
A930018P22Rik	-	-	A930018P22Rik	A930018P22Rik	TSS9669	chr2:103962925-103964903	-	-	0.00502592	0	0.0241831	OK	0.0284396	0	0.0735497	OK	0	0	0	OK
A930038C07Rik	-	-	A930038C07Rik	A930038C07Rik	TSS10925	chr6:65621604-65656924	-	-	0.00488112	0	0.0123649	OK	0.0513324	0.0206827	0.081982	OK	0	0	0	OK
AA387883	-	-	AA387883	AA387883	TSS2642	chr19:52997670-53001421	-	-	0.0434686	0	0.087532	OK	0.0313601	0	0.0636887	OK	0.0720212	0.0158075	0.128235	OK
AA388235	-	-	AA388235	AA388235	TSS15460	chr17:34118436-34122303	-	-	1.17715	0.8694	1.4849	OK	0.727265	0.522841	0.931688	OK	0.139215	0.0733706	0.205059	OK
AA408296	-	-	AA408296	AA408296	TSS9490	chr1:194930596-194956445	-	-	1.87025	1.50615	2.23435	OK	1.55664	1.25855	1.85472	OK	2.18897	1.81003	2.56791	OK
AA415398	-	-	AA415398	AA415398	TSS1928	chr4:119202922-119211374	-	-	1.13173	0.752654	1.51081	OK	0.876872	0.58477	1.16897	OK	2.32296	1.77858	2.86734	OK
AA465934	-	-	AA465934	AA465934	TSS18946	chr11:83105200-83112479	-	-	0.834971	0	2.13499	OK	0.7418	0	1.84199	OK	3.37377	0.769055	5.97848	OK
AA467197	-	-	AA467197	AA467197	TSS5035	chr2:122463622-122466812	-	-	0.121639	0	0.255489	OK	0.114627	0.00339394	0.22586	OK	0	0	0	OK
AA474331	-	-	AA474331	AA474331	TSS17588	chr10:39612565-39619044	-	-	3.0249	1.96065	4.08914	OK	3.3451	2.22644	4.46376	OK	0.759217	0.349182	1.16925	OK
AA543186	-	-	AA543186	AA543186	TSS4519	chr2:25182969-25188091	-	-	0.799962	0.482165	1.11776	OK	0.656943	0.400108	0.913778	OK	0.351874	0.1828	0.520948	OK
AA545190	-	-	AA545190	AA545190	TSS12805	chr6:10921467-10924378	-	-	0	0	0	OK	0	0	0	OK	0	0	0	OK
AA619741	-	-	AA619741	AA619741	TSS23328	chr1:34690379-34693055	-	-	0.00161336	0	0.00691043	OK	0	0	0	OK	0	0	0	OK
AA792892	-	-	AA792892	AA792892	TSS20044	chr5:94806364-94813359	-	-	0.00419368	0	0.018171	OK	0	0	0	OK	0	0	0	OK
AA881470	-	-	AA881470	AA881470	TSS15778	chr5:141180976-141195288	-	-	5.99516	4.95216	7.03816	OK	5.28882	4.35511	6.22254	OK	6.05111	5.03255	7.06967	OK
AA960436	-	-	AA960436	AA960436	TSS20131	chr8:97856183-97871413	-	-	6.43948	5.20124	7.67772	OK	5.24234	4.22196	6.26272	OK	7.55831	6.24164	8.87497	OK
AA986860	-	-	AA986860	AA986860	TSS8227	chr1:132628552-132641199	-	-	0.500359	0.312261	0.688457	OK	0.939319	0.671443	1.2072	OK	0.259858	0.149063	0.370654	OK
AB056442	-	-	AB056442	AB056442	TSS6051	chr19:7938878-8040517	-	-	0.0016824	0	0.00809519	OK	0.000318298	0	0.00272456	OK	0	0	0	OK
AB099516	-	-	AB099516	AB099516	TSS8247	chr15:100183630-100214866	-	-	0.0251204	0	0.0847961	OK	0.00439756	0	0.0268137	OK	0	0	0	OK
AB124611	-	-	AB124611	AB124611	TSS10838	chr9:21330620-21349775	-	-	0.214113	0.0707718	0.357455	OK	0.321319	0.147098	0.49554	OK	0.0267747	0	0.0686067	OK
AF067063	-	-	AF067063	AF067063	TSS16490	chrUn_random:125697-127960	-	-	0	0	0	OK	0	0	0	OK	0	0	0	OK
AF251705	-	-	AF251705	AF251705	TSS7044	chr11:114858082-114863194	-	-	0.022767	0	0.0575815	OK	0.353038	0.159488	0.546589	OK	0	0	0	OK
AF357355	-	-	AF357355	AF357355	TSS23513	chr12:110842154-110899921	-	-	0	0	0	OK	0	0	0	OK	0	0	0	OK
AF357359	-	-	AF357359	AF357359	TSS17602	chr12:110842154-110899921	-	-	0	0	0	OK	0	0	0	OK	0	0	0	OK
AF366264	-	-	AF366264	AF366264	TSS12030	chr8:13835230-13838089	-	-	0	0	0	OK	0.00732859	0	0.0173956	OK	0	0	0	OK
AF529169	-	-	AF529169	AF529169	TSS3297	chr9:89484871-89517824	-	-	0.0277612	0.00386117	0.0516612	OK	0.183364	0.105676	0.261051	OK	0	0	0	OK
AI118078	-	-	AI118078	AI118078	TSS11859	chr9:55174755-55286151	-	-	1.16515	0.806228	1.52406	OK	0.968537	0.667652	1.26942	OK	0.0243402	0.000594217	0.0480861	OK
AI182371	-	-	AI182371	AI182371	TSS3521	chr2:34939565-34956180	-	-	0.890006	0.552383	1.22763	OK	0.868811	0.570147	1.16747	OK	0.0475006	0.00686668	0.0881345	OK
AI314180	-	-	AI314180	AI314180	TSS15217	chr4:58812902-58925597	-	-	20.5416	16.867	24.2162	OK	17.8074	14.4975	21.1174	OK	9.43043	7.89311	10.9677	OK
AI314831	-	-	AI314831	AI314831	TSS22204	chr2:104916694-104966667	-	-	0	0	0	OK	0	0	0	OK	0	0	0	OK
AI314976	-	-	AI314976	AI314976	TSS17321	chr17:48549404-48556591	-	-	8.36576	6.61325	10.1183	OK	6.42264	5.05446	7.79082	OK	11.8165	9.70075	13.9322	OK
AI316807	-	-	AI316807	AI316807	TSS7134	chr8:23573085-23680088	-	-	15.4639	12.2409	18.6868	OK	11.2031	8.66332	13.7429	OK	4.32614	2.69658	5.9557	OK
AI317395	-	-	AI317395	AI317395	TSS16060	chr10:39721378-39745074	-	-	0.815267	0.539766	1.09077	OK	0.693207	0.464474	0.92194	OK	0.174803	0.0862483	0.263358	OK
AI413582	-	-	AI413582	AI413582	TSS23801	chr17:27700713-27702672	-	-	23.112	18.7929	27.4311	OK	17.1283	13.7064	20.5502	OK	36.8803	30.7396	43.0209	OK
AI414108	-	-	AI414108	AI414108	TSS6784	chr9:27160269-27165128	-	-	3.38216	2.79744	3.96689	OK	4.59848	3.86766	5.3293	OK	2.76429	2.28972	3.23885	OK
AI427809	-	-	AI427809	AI427809	TSS18615,TSS3985	chr4:53274227-53283104	-	-	1.10742	0.738202	1.47664	OK	1.02299	0.70222	1.34375	OK	0	0	0	OK
AI428936	-	-	AI428936	AI428936	TSS13316	chr7:31099834-31104064	-	-	21.3045	17.9035	24.7056	OK	16.3834	13.7228	19.044	OK	20.1639	16.9615	23.3664	OK
AI429214	-	-	AI429214	AI429214	TSS6111	chr8:38056628-38058587	-	-	2.86823	2.16715	3.56932	OK	1.99694	1.49847	2.49541	OK	0.114041	0.0424388	0.185644	OK
AI450353	-	-	AI450353	AI450353	TSS15702	chr11:83105200-83112479	-	-	0.341551	0	0.709288	OK	0.328497	0.0476905	0.609304	OK	1.04137	0.508327	1.57442	OK
AI462493	-	-	AI462493	AI462493	TSS11962	chr19:8954503-8955423	-	-	10.6943	8.35643	13.0323	OK	7.93825	6.08372	9.79279	OK	16.2703	13.2259	19.3146	OK
AI464131	-	-	AI464131	AI464131	TSS20972	chr4:41442636-41450109	-	-	0.440624	0.284611	0.596636	OK	0.550979	0.37815	0.723808	OK	1.68529	1.33235	2.03823	OK
AI467606	-	-	AI467606	AI467606	TSS17265	chr7:134234949-134237563	-	-	5.55346	4.47018	6.63675	OK	4.10714	3.27173	4.94256	OK	0.0155056	0	0.0346052	OK
AI480653	-	-	AI480653	AI480653	TSS24090	chr16:30955588-31081518	-	-	5.51823	4.57167	6.4648	OK	4.87105	4.04099	5.7011	OK	4.41687	3.65108	5.18266	OK
AI504432	-	-	AI504432	AI504432	TSS9168	chr3:106842421-106857240	-	-	0.0177373	0.00063666	0.0348378	OK	0.148442	0.0889622	0.207922	OK	0	0	0	OK
AI506816	-	-	AI506816	AI506816	TSS6534	chr5:23198084-23218484	-	-	0.00204484	0	0.0134025	OK	0	0	0	OK	0	0	0	OK
AI507597	-	-	AI507597	AI507597	TSS9837	chr4:141170147-141174548	-	-	0.0427389	0	0.118643	OK	0.1445	0.00521297	0.283787	OK	0	0	0	OK
AI593442	-	-	AI593442	AI593442	TSS3224	chr9:52481146-52487534	-	-	0.0113501	0	0.0229133	OK	0.0369268	0.0136474	0.0602061	OK	7.6985	6.47984	8.91717	OK
AI597468	-	-	AI597468	AI597468	TSS15896	chr10:84565371-84580492	-	-	18.4007	15.4467	21.3548	OK	13.374	11.2242	15.5237	OK	11.759	9.8986	13.6194	OK
AI597479	-	-	AI597479	AI597479	TSS16954	chr1:43155554-43172791	-	-	5.4387	4.52124	6.35615	OK	4.67303	3.90463	5.44143	OK	2.80201	2.2851	3.31892	OK
AI646023	-	-	AI646023	AI646023	TSS3531	chr10:75012869-75023075	-	-	0.0158116	0.00051345	0.0311097	OK	0.270272	0.169176	0.371369	OK	0.00611962	0	0.0136577	OK
AI661453	-	-	AI661453	AI661453	TSS18619	chr17:47549682-47607587	-	-	6.41818	5.40047	7.4359	OK	4.53748	3.8129	5.26206	OK	0.324778	0.216761	0.432795	OK
AI662270	-	-	AI662270	AI662270	TSS14906	chr11:83037077-83040086	-	-	0.153739	0.0379525	0.269526	OK	0.497111	0.27608	0.718142	OK	34.6573	29.1784	40.1362	OK
AI747448	-	-	AI747448	AI747448	TSS15580	chr3:144573884-144595493	-	-	0.0376174	0.00111108	0.0741238	OK	0	0	0	OK	0	0	0	OK
AI836003	-	-	AI836003	AI836003	TSS2492	chr15:97998236-98000565	-	-	4.92777	3.98955	5.86598	OK	3.65751	2.92499	4.39003	OK	0.205674	0.0993882	0.311959	OK
AI837181	-	-	AI837181	AI837181	TSS18289	chr19:5425143-5427316	-	-	18.7602	15.8281	21.6923	OK	14.8613	12.4475	17.2751	OK	22.7815	19.0395	26.5235	OK
AI846148	-	-	AI846148	AI846148	TSS17649	chr19:7430953-7457516	-	-	6.58683	5.13423	8.03943	OK	5.21646	4.06591	6.36701	OK	5.87576	4.59217	7.15935	OK
AI848100	-	-	AI848100	AI848100	TSS20920	chr1:163746242-163806792	-	-	13.6141	11.3518	15.8765	OK	11.4439	9.48192	13.4059	OK	5.65089	4.76483	6.53694	OK
AI854703	-	-	AI854703	AI854703	TSS23809	chr6:48578165-48583687	-	-	0.0624868	0.019547	0.105427	OK	0.163429	0.0841564	0.242701	OK	0.0512346	0.0160382	0.0864311	OK
AI987944	-	-	AI987944	AI987944	TSS14006,TSS22853	chr7:48628299-48648749	-	-	3.50931	2.68703	4.33159	OK	2.4097	1.89397	2.92544	OK	0.998453	0.716493	1.28041	OK
AK010878	-	-	AK010878	AK010878	TSS11906	chr12:103978039-103996020	-	-	5.782	3.98679	7.57721	OK	3.55492	2.47387	4.63596	OK	9.13628	6.39563	11.8769	OK
AK129341	-	-	AK129341	AK129341	TSS8807	chr9:8076632-8134294	-	-	3.97728	3.274	4.68056	OK	3.48288	2.89836	4.06739	OK	0	0	0	OK
AU015228	-	-	AU015228	AU015228	TSS467	chr2:129926129-129929111	-	-	0.00145552	0	0.00647223	OK	0.00183718	0	0.00674142	OK	0.00929754	0	0.0207362	OK
AU015836	-	-	AU015836	AU015836	TSS7473	chrX:91213994-91220809	-	-	0.00310421	0	0.0104201	OK	0.00493443	0	0.0127613	OK	0	0	0	OK
AU018091	-	-	AU018091	AU018091	TSS13353	chr7:3154659-3169204	-	-	0	0	0	OK	0	0	0	OK	0	0	0	OK
AU019823	-	-	AU019823	AU019823	TSS18723	chr9:50412005-50433105	-	-	4.55159	3.57222	5.53097	OK	3.98821	3.23166	4.74475	OK	2.32747	1.6322	3.02274	OK
AU019990	-	-	AU019990	AU019990	TSS9687	chr2:132423931-132478800	-	-	0	0	0	OK	0	0	0	OK	0	0	0	OK
AU021034	-	-	AU021034	AU021034	TSS4531	chr14:78480830-78488814	-	-	0	0	0	OK	0.00221768	0	0.00831042	OK	0	0	0	OK
AU021092	-	-	AU021092	AU021092	TSS8411	chr16:5211911-5222392	-	-	0.0265549	0	0.0631516	OK	1.20746	0.786477	1.62845	OK	0	0	0	OK
AU022252	-	-	AU022252	AU022252	TSS18152	chr4:118897742-118905329	-	-	3.13229	2.38077	3.88382	OK	2.46018	1.85936	3.06101	OK	5.84989	4.79389	6.90589	OK
AU022751	-	-	AU022751	AU022751	TSS11374	chrX:5658335-5660538	-	-	0.0455881	0.0018665	0.0893097	OK	0.105551	0.0368112	0.17429	OK	0.155652	0.0629459	0.248358	OK
AU023871	-	-	AU023871	AU023871	TSS19712	chr17:35199637-35203129	-	-	0.0199522	0	0.047869	OK	0.028178	0	0.0577603	OK	0	0	0	OK
AU040320	-	-	AU040320	AU040320	TSS15913,TSS20309	chr4:126430798-126645167	-	-	36.4674	27.2475	45.6873	OK	26.4601	19.3607	33.5595	OK	24.6094	18.8381	30.3807	OK
AU041133	-	-	AU041133	AU041133	TSS858	chr10:81590757-81615810	-	-	2.12961	1.61249	2.64673	OK	1.45654	1.10162	1.81146	OK	0.673338	0.456919	0.889757	OK
AV249152	-	-	AV249152	AV249152	TSS22693	chr11:21472283-21798689	-	-	6.37958	5.25981	7.49935	OK	4.20535	3.43448	4.97621	OK	2.55434	2.01329	3.09539	OK
AV320801	-	-	AV320801	AV320801	TSS410	chrX:132029126-132039133	-	-	0	0	0	OK	0	0	0	OK	0.000179858	0	0.00151123	OK
AW011738	-	-	AW011738	AW011738	TSS16087	chr4:155577392-155580137	-	-	0.75621	0.496236	1.01618	OK	0.757738	0.512909	1.00257	OK	2.04515	1.57657	2.51373	OK
AW112010	-	-	AW112010	AW112010	TSS12063	chr19:11122101-11125056	-	-	0.216783	0.0433859	0.39018	OK	2.41481	1.60567	3.22396	OK	0	0	0	OK
AW146020	-	-	AW146020	AW146020	TSS12324	chr6:81873662-81915943	-	-	1.90066	1.37397	2.42736	OK	1.42195	1.02662	1.81729	OK	2.22433	1.58288	2.86578	OK
AW146154	-	-	AW146154	AW146154	TSS10317	chr7:48734243-48755260	-	-	1.75813	1.34389	2.17238	OK	1.4086	1.09117	1.72602	OK	0.188509	0.105045	0.271972	OK
AW209491	-	-	AW209491	AW209491	TSS18593,TSS3392	chr13:14722511-14730469	-	-	8.09019	6.53436	9.64602	OK	4.84808	3.88691	5.80925	OK	6.66789	5.45468	7.8811	OK
AW549877	-	-	AW549877	AW549877	TSS16762	chr15:3932034-3945752	-	-	18.8397	15.626	22.0534	OK	17.9534	14.7159	21.191	OK	7.49191	6.31318	8.67065	OK
AW551984	-	-	AW551984	AW551984	TSS11408,TSS2899	chr9:39394980-39411709	-	-	1.59719	1.23994	1.95445	OK	1.72784	1.38646	2.06921	OK	0.476674	0.330583	0.622765	OK
AW554918	-	-	AW554918	AW554918	TSS13133	chr18:25327520-25625822	-	-	3.22231	2.67667	3.76796	OK	2.90546	2.43145	3.37948	OK	2.10808	1.74388	2.47228	OK
AW555464	-	-	AW555464	AW555464	TSS23210	chr12:113960384-113984802	-	-	28.7528	22.7504	34.7551	OK	27.9862	22.0052	33.9672	OK	17.126	13.9556	20.2963	OK
AY026312	-	-	AY026312	AY026312	TSS7823	chr16:88932048-88932509	-	-	0	0	0	OK	0	0	0	OK	0	0	0	OK
AY074887	-	-	AY074887	AY074887	TSS21647	chr9:54798063-54805837	-	-	0.149644	0	0.492032	OK	0.0856905	0	0.328234	OK	0.303351	0	0.919722	OK
AY358078	-	-	AY358078	AY358078	TSS23062	chr14:52419720-52446034	-	-	3.85261	2.91117	4.79405	OK	1.91988	1.37998	2.45979	OK	5.42956	4.37976	6.47937	OK
AY512915	-	-	AY512915	AY512915	TSS19194	chr6:95240567-95283987	-	-	0.000961284	0	0.0046254	OK	0	0	0	OK	0	0	0	OK
AY512931	-	-	AY512931	AY512931	TSS8277	chr8:46146055-46150772	-	-	0.0138018	0	0.0339452	OK	0.0421578	0.00805022	0.0762653	OK	0	0	0	OK
AY761184	-	-	AY761184	AY761184	TSS20899	chr8:22812995-22814119	-	-	0.0802622	0	0.191386	OK	0	0	0	OK	0	0	0	OK
AY761185	-	-	AY761185	AY761185	TSS12602,TSS3300	chr8:22083372-22084427	-	-	0	0	0	OK	0	0	0	OK	0	0	0	OK
Aaas	-	-	Aaas	Aaas	TSS1650	chr15:102168677-102181190	-	-	4.01222	3.11826	4.90618	OK	3.08486	2.37226	3.79746	OK	24.1965	20.389	28.0039	OK
Aacs	-	-	Aacs	Aacs	TSS20901	chr5:125956242-125997773	-	-	18.477	15.5295	21.4245	OK	14.7982	12.4715	17.1248	OK	36.1487	29.579	42.7185	OK
Aadac	-	-	Aadac	Aadac	TSS13265	chr3:59835709-59844079	-	-	0.0341067	0	0.0758151	OK	0.232581	0.0969896	0.368173	OK	0	0	0	OK
Aadacl2	-	-	Aadacl2	Aadacl2	TSS7772	chr3:59810664-59829342	-	-	0	0	0	OK	0	0	0	OK	0	0	0	OK
Aadacl3	-	-	Aadacl3	Aadacl3	TSS20584	chr4:144043673-144053659	-	-	0	0	0	OK	0	0	0	OK	0	0	0	OK
Aadat	-	-	Aadat	Aadat	TSS23477	chr8:62984920-63024474	-	-	0.0419424	0	0.0839114	OK	0.0723664	0.0193495	0.125383	OK	0.118276	0.0440147	0.192538	OK
Aagab	-	-	Aagab	Aagab	TSS3157	chr9:63450461-63489696	-	-	17.6513	14.8873	20.4153	OK	13.1534	11.0971	15.2096	OK	15.3124	12.9121	17.7126	OK
Aak1	-	-	Aak1	Aak1	TSS9726	chr6:86799510-86953221	-	-	7.75297	6.14955	9.35639	OK	7.59948	6.07124	9.12772	OK	5.0344	4.06534	6.00345	OK
Aamp	-	-	Aamp	Aamp	TSS18312	chr1:74326413-74331312	-	-	47.1452	38.9553	55.3351	OK	33.2184	27.7842	38.6525	OK	78.3498	62.1646	94.535	OK
Aanat	-	-	Aanat	Aanat	TSS4231	chr11:116455000-116458994	-	-	0.191891	0.0616383	0.322143	OK	0.152035	0.0488435	0.255226	OK	0.157562	0.0489121	0.266212	OK
Aard	-	-	Aard	Aard	TSS5652	chr15:51871652-51877269	-	-	0.37883	0.172457	0.585203	OK	1.83057	1.24823	2.41291	OK	0.429117	0.207363	0.65087	OK
Aars	-	-	Aars	Aars	TSS11841	chr8:113557866-113581499	-	-	29.4381	23.8192	35.057	OK	19.9732	16.399	23.5474	OK	62.3992	45.4436	79.3547	OK
Aars2	-	-	Aars2	Aars2	TSS18935	chr17:45643789-45657792	-	-	1.82986	1.4006	2.25913	OK	1.9036	1.47857	2.32863	OK	3.61565	2.96112	4.27017	OK
Aarsd1	-	-	Aarsd1	Aarsd1	TSS16408	chr11:101268153-101278747	-	-	10.29	8.3848	12.1952	OK	8.7872	7.15239	10.422	OK	32.2286	27.1851	37.2721	OK
Aasdh	-	-	Aasdh	Aasdh	TSS4536	chr5:77304959-77334539	-	-	2.55573	2.0391	3.07236	OK	2.80725	2.29169	3.32282	OK	1.80278	1.42468	2.18087	OK
Aasdhppt	-	-	Aasdhppt	Aasdhppt	TSS24033	chr9:4294792-4309494	-	-	6.90246	5.74677	8.05814	OK	4.6255	3.84499	5.406	OK	2.75918	2.21927	3.29908	OK
Aass	-	-	Aass	Aass	TSS20071	chr6:23022172-23082986	-	-	1.86218	1.44235	2.28202	OK	1.4732	1.1496	1.79681	OK	2.30443	1.86574	2.74313	OK
Aatf	-	-	Aatf	Aatf	TSS9666	chr11:84236357-84327003	-	-	5.48534	4.38458	6.5861	OK	3.78862	2.99954	4.57769	OK	7.99212	6.63058	9.35366	OK
Aatk	-	-	Aatk	Aatk	TSS8037,TSS8779	chr11:119868631-119908459	-	-	2.27515	1.82699	2.72331	OK	8.15606	6.8969	9.41523	OK	8.47709	6.98067	9.97352	OK
Abat	-	-	Abat	Abat	TSS7040	chr16:8513521-8621660	-	-	35.7179	28.8805	42.5552	OK	28.8633	23.0552	34.6715	OK	26.6294	21.5161	31.7428	OK
Abca1	-	-	Abca1	Abca1	TSS5232	chr4:53043660-53172767	-	-	13.3787	10.824	15.9333	OK	19.6762	15.1183	24.234	OK	0.0990281	0.0609294	0.137127	OK
Abca12	-	-	Abca12	Abca12	TSS4762	chr1:71289663-71461484	-	-	0	0	0	OK	0	0	0	OK	0	0	0	OK
Abca13	-	-	Abca13	Abca13	TSS11338	chr11:9091944-9584262	-	-	0.000833921	0	0.00252976	OK	0.00241068	0	0.00499526	OK	0	0	0	OK
Abca14	-	-	Abca14	Abca14	TSS12890	chr7:127347477-127468866	-	-	0.0977636	0.0469593	0.148568	OK	0.12222	0.068258	0.176181	OK	0	0	0	OK
Abca15	-	-	Abca15	Abca15	TSS3973	chr7:127472197-127551201	-	-	0	0	0	OK	0.00366232	0	0.00869313	OK	0	0	0	OK
Abca16	-	-	Abca16	Abca16	TSS21598	chr7:127565214-127688325	-	-	0	0	0	OK	0	0	0	OK	0	0	0	OK
Abca17	-	-	Abca17	Abca17	TSS5211	chr17:24401223-24484197	-	-	0.011714	0	0.024177	OK	0.013058	0.00113322	0.0249829	OK	2.25269e-05	0	0.000428338	OK
Abca2	-	-	Abca2	Abca2	TSS15546	chr2:25284193-25304059	-	-	13.7311	11.2755	16.1868	OK	21.1548	16.7548	25.5548	OK	21.8267	17.058	26.5954	OK
Abca3	-	-	Abca3	Abca3	TSS13898	chr17:24488990-24551458	-	-	23.0466	18.4305	27.6627	OK	21.8511	17.5363	26.166	OK	14.8684	12.086	17.6508	OK
Abca4	-	-	Abca4	Abca4	TSS23370	chr3:121747377-121882979	-	-	0.166295	0.0997715	0.232819	OK	0.138027	0.083543	0.192511	OK	0.144963	0.0896302	0.200296	OK
Abca5	-	-	Abca5	Abca5	TSS5700	chr11:110130682-110199030	-	-	19.4634	15.7156	23.2112	OK	16.6414	13.2585	20.0243	OK	5.61622	4.72225	6.51019	OK
Abca6	-	-	Abca6	Abca6	TSS4272	chr11:110038135-110113090	-	-	0.0751796	0.0269569	0.123402	OK	0.158005	0.0388471	0.277163	OK	0.00503421	0	0.0121784	OK
Abca7	-	-	Abca7	Abca7	TSS19990	chr10:79460359-79478317	-	-	10.2306	8.582	11.8791	OK	13.156	10.9194	15.3925	OK	37.7625	28.6453	46.8798	OK
Abca8a	-	-	Abca8a	Abca8a	TSS10030	chr11:109886947-109957251	-	-	0.198552	0.116364	0.280739	OK	0.964777	0.75225	1.1773	OK	0	0	0	OK
Abca8b	-	-	Abca8b	Abca8b	TSS18944	chr11:109794719-109857130	-	-	2.41163	1.98748	2.83579	OK	2.36781	1.97605	2.75957	OK	0	0	0	OK
Abca9	-	-	Abca9	Abca9	TSS16034	chr11:109962135-110029467	-	-	0.0257575	0.00634696	0.0451681	OK	0.302635	0.206116	0.399155	OK	0	0	0	OK
Abcb10	-	-	Abcb10	Abcb10	TSS11611	chr8:126476358-126507022	-	-	16.8171	14.1007	19.5335	OK	15.859	13.2635	18.4545	OK	4.3999	3.68043	5.11937	OK
Abcb11	-	-	Abcb11	Abcb11	TSS18340	chr2:69076338-69180673	-	-	0.0995603	0.0463575	0.152763	OK	0.088967	0.0437158	0.134218	OK	0.196073	0.118056	0.27409	OK
Abcb1a	-	-	Abcb1a	Abcb1a	TSS8686	chr5:8660091-8748570	-	-	0.0885268	0.039164	0.13789	OK	0.461437	0.322972	0.599902	OK	0.0116808	0.000544428	0.0228171	OK
Abcb1b	-	-	Abcb1b	Abcb1b	TSS7615	chr5:8798146-8866314	-	-	0.118742	0.0561197	0.181365	OK	0.272058	0.170475	0.373641	OK	0.559756	0.393671	0.72584	OK
Abcb4	-	-	Abcb4	Abcb4	TSS21236	chr5:8893720-8959226	-	-	1.40006	1.06249	1.73763	OK	1.6619	1.31621	2.0076	OK	33.4345	26.8724	39.9967	OK
Abcb5	-	-	Abcb5	Abcb5	TSS11696	chr12:120106296-120204894	-	-	0.000903771	0	0.00434866	OK	0	0	0	OK	0	0	0	OK
Abcb6	-	-	Abcb6	Abcb6	TSS24069	chr1:75168214-75176857	-	-	2.53611	1.97616	3.09605	OK	2.3151	1.81092	2.81928	OK	11.0191	9.2952	12.743	OK
Abcb7	-	-	Abcb7	Abcb7	TSS20530	chrX:101475903-101609185	-	-	7.42157	6.25748	8.58566	OK	6.14109	5.17648	7.10569	OK	3.96684	3.34177	4.59191	OK
Abcb8	-	-	Abcb8	Abcb8	TSS5772	chr5:23899973-23915765	-	-	7.82741	6.55531	9.09951	OK	6.64675	5.55936	7.73415	OK	11.9951	10.1201	13.8701	OK
Abcb9	-	-	Abcb9	Abcb9	TSS701	chr5:124511865-124545807	-	-	21.0725	17.6658	24.4793	OK	14.9243	12.5712	17.2774	OK	2.88165	2.32825	3.43506	OK
Abcc1	-	-	Abcc1	Abcc1	TSS22187	chr16:14361652-14474967	-	-	6.82215	5.75138	7.89291	OK	6.56097	5.53229	7.58965	OK	8.73307	7.32631	10.1398	OK
Abcc10	-	-	Abcc10	Abcc10	TSS23723,TSS3425	chr17:46434369-46464972	-	-	5.60053	4.69171	6.50936	OK	5.78089	4.8884	6.67337	OK	2.49402	2.05551	2.93254	OK
Abcc12	-	-	Abcc12	Abcc12	TSS10661	chr8:89028739-89090489	-	-	0.0058134	0	0.0143233	OK	0.0545766	0.0213566	0.0877965	OK	0	0	0	OK
Abcc2	-	-	Abcc2	Abcc2	TSS12970	chr19:43856797-43912708	-	-	0.490537	0.336597	0.644478	OK	0.335946	0.226224	0.445669	OK	0	0	0	OK
Abcc3	-	-	Abcc3	Abcc3	TSS23973	chr11:94204608-94254290	-	-	0.123793	0.0624256	0.18516	OK	0.629481	0.453451	0.805511	OK	0.112921	0.0595131	0.16633	OK
Abcc4	-	-	Abcc4	Abcc4	TSS18734,TSS2474	chr14:118881913-119105441	-	-	4.97425	4.17843	5.77008	OK	5.84249	4.92561	6.75937	OK	7.11437	5.98902	8.23973	OK
Abcc5	-	-	Abcc5	Abcc5	TSS16635	chr16:20331376-20426467	-	-	15.1903	11.6407	18.7398	OK	15.7304	11.923	19.5377	OK	10.9569	8.40265	13.5111	OK
Abcc6	-	-	Abcc6	Abcc6	TSS8442	chr7:53231749-53285656	-	-	0.000952102	0	0.00407808	OK	0.0147915	0.000918426	0.0286646	OK	0	0	0	OK
Abcc8	-	-	Abcc8	Abcc8	TSS24004	chr7:53359892-53435403	-	-	237.684	113.165	362.203	OK	226.472	101.517	351.428	OK	334.573	72.4033	596.742	OK
Abcc9	-	-	Abcc9	Abcc9	TSS16121	chr6:142536381-142650794	-	-	0.0409778	0.0136904	0.0682651	OK	1.30492	1.05865	1.55119	OK	0.0139925	0.00289206	0.025093	OK
Abcd1	-	-	Abcd1	Abcd1	TSS15508	chrX:70961935-70983626	-	-	14.2352	11.9984	16.472	OK	11.5214	9.71718	13.3256	OK	8.27609	6.97994	9.57223	OK
Abcd2	-	-	Abcd2	Abcd2	TSS4853	chr15:90976301-91022238	-	-	0.540457	0.377586	0.703328	OK	0.515599	0.375374	0.655825	OK	0.291193	0.193855	0.388531	OK
Abcd3	-	-	Abcd3	Abcd3	TSS2543	chr3:121461827-121518133	-	-	46.6761	37.7928	55.5594	OK	39.6793	31.8481	47.5106	OK	17.1784	14.3849	19.972	OK
Abcd4	-	-	Abcd4	Abcd4	TSS14384	chr12:85943480-85958416	-	-	1.23697	0.86666	1.60727	OK	1.29338	0.932844	1.65391	OK	1.71975	1.29275	2.14674	OK
Abce1	-	-	Abce1	Abce1	TSS12357	chr8:82207340-82235639	-	-	15.0313	12.6529	17.4098	OK	10.8504	9.13172	12.569	OK	21.3608	17.6193	25.1023	OK
Abcf1	-	-	Abcf1	Abcf1	TSS3650	chr17:36093763-36106695	-	-	16.4216	13.8228	19.0205	OK	12.4412	10.4796	14.4028	OK	38.3501	31.0679	45.6323	OK
Abcf2	-	-	Abcf2	Abcf2	TSS16959	chr5:24071158-24083285	-	-	11.4736	9.65734	13.2898	OK	8.14062	6.81124	9.47001	OK	28.6265	23.7361	33.5169	OK
Abcf3	-	-	Abcf3	Abcf3	TSS20869	chr16:20548675-20561676	-	-	13.7117	11.5632	15.8601	OK	10.1534	8.56615	11.7407	OK	20.1318	16.8206	23.4431	OK
Abcg1	-	-	Abcg1	Abcg1	TSS9582	chr17:31194638-31254926	-	-	10.6499	8.95031	12.3494	OK	9.84691	8.25647	11.4373	OK	15.289	12.6114	17.9666	OK
Abcg2	-	-	Abcg2	Abcg2	TSS10945	chr6:58546665-58642445	-	-	0.135466	0.0524487	0.218484	OK	0.88265	0.610611	1.15469	OK	4.72293	3.89138	5.55447	OK
Abcg3	-	-	Abcg3	Abcg3	TSS11968	chr5:105364075-105411736	-	-	0.0361243	0.00382772	0.0684209	OK	0.0940317	0.0401234	0.14794	OK	0	0	0	OK
Abcg4	-	-	Abcg4	Abcg4	TSS15294	chr9:44081272-44096327	-	-	0.0765496	0.0278418	0.125257	OK	0.229609	0.129604	0.329614	OK	0.0488577	0.0152941	0.0824214	OK
Abcg5	-	-	Abcg5	Abcg5	TSS82	chr17:85057573-85082263	-	-	0.0407107	0.00179889	0.0796226	OK	0.0332494	0.00286485	0.063634	OK	0.0267895	0.000654014	0.052925	OK
Abcg8	-	-	Abcg8	Abcg8	TSS323	chr17:85082470-85099673	-	-	0.0215186	0.000763379	0.0422738	OK	0.0317236	0.00686063	0.0565867	OK	0.00755869	0	0.0168694	OK
Abhd1	-	-	Abhd1	Abhd1	TSS1054,TSS13675	chr5:31252438-31262734	-	-	0.333014	0	2.71356	OK	0.388781	0	1.7106	OK	0.404278	0	2.38705	OK
Abhd10	-	-	Abhd10	Abhd10	TSS19190	chr16:45730509-45743019	-	-	5.4655	4.41808	6.51292	OK	3.97579	3.21501	4.73656	OK	7.95643	6.65076	9.2621	OK
Abhd11	-	-	Abhd11	Abhd11	TSS12648,TSS14495,TSS5204	chr5:135485021-135489027	-	-	8.17169	6.31776	10.0256	OK	6.54858	5.03246	8.0647	OK	6.05572	4.65861	7.45282	OK
Abhd12	-	-	Abhd12	Abhd12	TSS7037	chr2:150658250-150730467	-	-	25.727	21.6897	29.7643	OK	19.0297	16.0544	22.0051	OK	23.7966	20.0449	27.5484	OK
Abhd12b	-	-	Abhd12b	Abhd12b	TSS13036	chr12:71255157-71284193	-	-	0	0	0	OK	0	0	0	OK	0	0	0	OK
Abhd13	-	-	Abhd13	Abhd13	TSS19395	chr8:9977716-9992154	-	-	8.05524	6.78566	9.32481	OK	7.01912	5.78761	8.25063	OK	2.16916	1.74271	2.5956	OK
Abhd14a	-	-	Abhd14a	Abhd14a	TSS21528	chr9:106342381-106350009	-	-	7.84308	6.02401	9.66214	OK	6.27235	4.80972	7.73497	OK	12.5904	10.2845	14.8964	OK
Abhd14b	-	-	Abhd14b	Abhd14b	TSS21515	chr9:106350970-106355249	-	-	33.4692	28.2192	38.7192	OK	25.7928	21.761	29.8247	OK	11.612	9.67729	13.5467	OK
Abhd15	-	-	Abhd15	Abhd15	TSS3154	chr11:77328618-77334130	-	-	17.2578	14.5347	19.9808	OK	16.2602	13.6819	18.8384	OK	13.6362	11.4972	15.7753	OK
Abhd16a	-	-	Abhd16a	Abhd16a	TSS3971	chr17:35226235-35239932	-	-	29.3603	24.7263	33.9942	OK	22.5166	18.9892	26.044	OK	44.1703	36.6734	51.6671	OK
Abhd16b	-	-	Abhd16b	Abhd16b	TSS9284	chr2:181227910-181229685	-	-	0.183254	0.0698092	0.296699	OK	0.137247	0.0479757	0.226518	OK	0.109891	0.0343995	0.185382	OK
Abhd2	-	-	Abhd2	Abhd2	TSS16967	chr7:86418151-86506487	-	-	82.8989	64.4291	101.369	OK	60.7635	47.7783	73.7488	OK	28.2226	23.3578	33.0874	OK
Abhd3	-	-	Abhd3	Abhd3	TSS20941	chr18:10644408-10706694	-	-	5.14692	4.10161	6.19224	OK	3.2324	2.5289	3.9359	OK	0.124726	0.0464148	0.203037	OK
Abhd4	-	-	Abhd4	Abhd4	TSS14943	chr14:54878971-54888840	-	-	13.0485	10.988	15.1091	OK	10.822	9.11523	12.5287	OK	14.5489	12.2733	16.8245	OK
Abhd5	-	-	Abhd5	Abhd5	TSS10966	chr9:122260733-122290641	-	-	5.15903	4.26299	6.05508	OK	3.74005	3.08415	4.39595	OK	3.62017	2.98089	4.25944	OK
Abhd6	-	-	Abhd6	Abhd6	TSS882	chr14:8835415-8889069	-	-	7.59247	6.2547	8.93023	OK	5.19858	4.24919	6.14797	OK	11.0538	9.30285	12.8048	OK
Abhd8	-	-	Abhd8	Abhd8	TSS9540	chr8:73980598-73987556	-	-	15.0698	12.6717	17.4679	OK	12.1497	10.1813	14.1181	OK	43.2362	36.1027	50.3698	OK
Abi1	-	-	Abi1	Abi1	TSS16027	chr2:22751041-22895760	-	-	16.3806	13.4671	19.294	OK	13.1067	10.9107	15.3027	OK	10.0685	8.37863	11.7583	OK
Abi2	-	-	Abi2	Abi2	TSS24078	chr1:60466462-60538007	-	-	8.37148	7.03782	9.70515	OK	7.50651	6.26646	8.74657	OK	9.57108	7.97759	11.1646	OK
Abi3	-	-	Abi3	Abi3	TSS21262,TSS7956	chr11:95685813-95707045	-	-	0.0458562	0	0.0918272	OK	0.913328	0.660652	1.166	OK	0.0250851	0	0.0764945	OK
Abi3bp	-	-	Abi3bp	Abi3bp	TSS20504	chr16:56477958-56690248	-	-	0.033807	0	0.0784362	OK	0.312792	0.18906	0.436523	OK	0.0188061	0.0021631	0.035449	OK
Abl1	-	-	Abl1	Abl1	TSS18376,TSS20973	chr2:31544075-31659747	-	-	9.57127	8.00319	11.1394	OK	10.3539	8.64992	12.0578	OK	9.6546	8.0052	11.304	OK
Abl2	-	-	Abl2	Abl2	TSS12982	chr1:158488917-158579750	-	-	4.13499	3.39915	4.87083	OK	4.43936	3.72083	5.1579	OK	2.64039	2.18969	3.09109	OK
Ablim1	-	-	Ablim1	Ablim1	TSS15548,TSS8414,TSS9947	chr19:57107753-57290522	-	-	6.78437	5.70665	7.86208	OK	7.47577	6.26863	8.6829	OK	0.595115	0.444241	0.745989	OK
Ablim2	-	-	Ablim2	Ablim2	TSS290	chr5:36100528-36227628	-	-	0.719067	0.442825	0.995308	OK	0.87015	0.584704	1.1556	OK	0.0083306	0	0.023727	OK
Ablim3	-	-	Ablim3	Ablim3	TSS4260,TSS6568	chr18:61959046-62071506	-	-	0.038213	0	0.0807697	OK	0.409424	0.254059	0.564788	OK	0	0	0	OK
Abo	-	-	Abo	Abo	TSS9986	chr2:26698022-26720499	-	-	0.0473392	0.00238128	0.0922972	OK	0.0388483	0.00241214	0.0752844	OK	0	0	0	OK
Abp1	-	-	Abp1	Abp1	TSS15044,TSS22901	chr6:48845253-48859186	-	-	0.0417609	0.00191669	0.0816051	OK	0.0266335	0.00104732	0.0522197	OK	0	0	0	OK
Abpa	-	-	Abpa	Abpa	TSS11549	chr7:34806585-34807900	-	-	0	0	0	OK	0	0	0	OK	0	0	0	OK
Abpb	-	-	Abpb	Abpb	TSS3042	chr7:34796950-34798961	-	-	0	0	0	OK	0	0	0	OK	0	0	0	OK
Abpd	-	-	Abpd	Abpd	TSS15118	chr7:34149361-34151338	-	-	0	0	0	OK	0	0	0	OK	0	0	0	OK
Abpe	-	-	Abpe	Abpe	TSS23613	chr7:32087787-32089996	-	-	0	0	0	OK	0	0	0	OK	0	0	0	OK
Abpg	-	-	Abpg	Abpg	TSS14451	chr7:34728015-34730004	-	-	0	0	0	OK	0	0	0	OK	0	0	0	OK
Abpz	-	-	Abpz	Abpz	TSS15999	chr7:34522211-34524314	-	-	0	0	0	OK	0	0	0	OK	0	0	0	OK
Abr	-	-	Abr	Abr	TSS12230,TSS12605,TSS9170	chr11:76230235-76391229	-	-	34.9758	27.8479	42.1038	OK	27.8518	22.1643	33.5394	OK	23.5019	18.8495	28.1544	OK
Abra	-	-	Abra	Abra	TSS8810	chr15:41696838-41701266	-	-	0.00275262	0	0.011927	OK	0.0122071	0	0.0289756	OK	0.0684153	0.015016	0.121815	OK
Abt1	-	-	Abt1	Abt1	TSS21059	chr13:23510229-23515735	-	-	1.44467	1.11264	1.7767	OK	0.936745	0.706617	1.16687	OK	2.71697	2.24639	3.18755	OK
Abtb1	-	-	Abtb1	Abtb1	TSS5846	chr6:88785907-88791929	-	-	8.43292	6.94039	9.92545	OK	7.40949	6.07884	8.74015	OK	11.3233	9.46938	13.1771	OK
Abtb2	-	-	Abtb2	Abtb2	TSS10287	chr2:103406466-103558580	-	-	1.64635	1.28847	2.00422	OK	1.51493	1.18776	1.8421	OK	3.21811	2.66717	3.76905	OK
Acaa1a	-	-	Acaa1a	Acaa1a	TSS15299	chr9:119250411-119259413	-	-	23.0822	19.47	26.6945	OK	19.9384	16.8126	23.0643	OK	47.1101	39.3401	54.8801	OK
Acaa1b	-	-	Acaa1b	Acaa1b	TSS8952	chr9:119057160-119066211	-	-	0.364324	0.177513	0.551135	OK	0.350438	0.17366	0.527215	OK	0.732436	0.438712	1.02616	OK
Acaa2	-	-	Acaa2	Acaa2	TSS18714	chr18:74938865-74965861	-	-	6.90678	5.53169	8.28186	OK	6.5548	5.2996	7.81	OK	10.3309	8.57838	12.0833	OK
Acaca	-	-	Acaca	Acaca	TSS8002	chr11:84008939-84215153	-	-	2.2417	1.87223	2.61116	OK	2.08473	1.74984	2.41961	OK	4.30916	3.62961	4.9887	OK
Acacb	-	-	Acacb	Acacb	TSS19840	chr5:114615526-114700767	-	-	0.0283529	0.0094049	0.047301	OK	0.686739	0.534236	0.839241	OK	0.04621	0.021817	0.0706029	OK
Acad10	-	-	Acad10	Acad10	TSS3113	chr5:122071037-122110519	-	-	2.0671	1.61757	2.51664	OK	1.92097	1.51595	2.32599	OK	1.18738	0.89302	1.48173	OK
Acad11	-	-	Acad11	Acad11	TSS10694	chr9:103966032-104029976	-	-	9.4183	7.92876	10.9078	OK	7.20231	6.05852	8.3461	OK	9.63678	8.12844	11.1451	OK
Acad8	-	-	Acad8	Acad8	TSS6448	chr9:26781725-26807134	-	-	5.32117	4.37958	6.26276	OK	3.6968	3.02587	4.36772	OK	3.5135	2.86429	4.1627	OK
Acad9	-	-	Acad9	Acad9	TSS7843	chr3:35964921-35991779	-	-	3.76879	3.10031	4.43727	OK	3.32838	2.75601	3.90074	OK	5.46231	4.59222	6.33241	OK
Acadl	-	-	Acadl	Acadl	TSS2908	chr1:66877426-66909841	-	-	11.4223	9.5339	13.3108	OK	9.77999	8.19512	11.3649	OK	9.4126	7.86294	10.9623	OK
Acadm	-	-	Acadm	Acadm	TSS5742	chr3:153585322-153607396	-	-	5.25468	4.18347	6.32589	OK	5.13102	4.1552	6.10683	OK	6.96393	5.72664	8.20122	OK
Acads	-	-	Acads	Acads	TSS11232	chr5:115560307-115569322	-	-	5.36304	4.2829	6.44318	OK	5.10006	4.0957	6.10442	OK	24.2442	20.4424	28.0459	OK
Acadsb	-	-	Acadsb	Acadsb	TSS5537	chr7:138554114-138589725	-	-	28.3388	23.5423	33.1352	OK	22.6505	18.7584	26.5425	OK	11.2943	9.52336	13.0652	OK
Acadvl	-	-	Acadvl	Acadvl	TSS19801	chr11:69823693-69828909	-	-	18.0335	15.1897	20.8774	OK	13.9478	11.7601	16.1354	OK	21.8418	18.3686	25.3149	OK
Acan	-	-	Acan	Acan	TSS17941	chr7:86198368-86259985	-	-	0.00122492	0	0.00411174	OK	0	0	0	OK	0	0	0	OK
Acap1	-	-	Acap1	Acap1	TSS14400	chr11:69695068-69709041	-	-	0.0732172	0.016839	0.129595	OK	0.0952678	0.0342869	0.156249	OK	0.0252109	0.000615474	0.0498063	OK
Acap2	-	-	Acap2	Acap2	TSS15515	chr16:31092498-31201324	-	-	6.97516	5.88265	8.06766	OK	8.18926	6.8652	9.51333	OK	4.31369	3.63843	4.98894	OK
Acap3	-	-	Acap3	Acap3	TSS4381	chr4:155265983-155281360	-	-	5.75457	4.82974	6.67939	OK	5.38185	4.52067	6.24304	OK	18.0345	15.0132	21.0558	OK
Acat1	-	-	Acat1	Acat1	TSS16944	chr9:53388626-53418455	-	-	18.3049	15.3806	21.2293	OK	12.6763	10.6661	14.6865	OK	53.5531	41.6552	65.451	OK
Acat2	-	-	Acat2	Acat2	TSS1445	chr17:13135907-13153591	-	-	2.71836	2.0529	3.38382	OK	2.65041	2.04372	3.25709	OK	17.6293	14.8719	20.3867	OK
Acat3	-	-	Acat3	Acat3	TSS21126	chr17:13109330-13133262	-	-	0.0918983	0	0.562675	OK	0.0795371	0	0.455775	OK	0.601764	0	3.23977	OK
Acbd3	-	-	Acbd3	Acbd3	TSS20180	chr1:182656173-182684335	-	-	21.5289	18.0382	25.0195	OK	17.274	14.4554	20.0926	OK	15.4571	12.9792	17.935	OK
Acbd4	-	-	Acbd4	Acbd4	TSS3824	chr11:102963001-102973513	-	-	2.18263	1.6083	2.75696	OK	2.00205	1.48494	2.51915	OK	2.75652	2.11986	3.39317	OK
Acbd5	-	-	Acbd5	Acbd5	TSS1079,TSS6269	chr2:22923720-22970032	-	-	21.8076	18.0012	25.6141	OK	15.9026	13.2859	18.5192	OK	5.61845	4.72852	6.50837	OK
Acbd6	-	-	Acbd6	Acbd6	TSS3663	chr1:157405249-157534363	-	-	16.6396	13.4733	19.8058	OK	13.8343	11.185	16.4836	OK	23.1291	19.2523	27.006	OK
Acbd7	-	-	Acbd7	Acbd7	TSS19498	chr2:3253439-3258269	-	-	0.145911	0	0.29901	OK	0.0915345	0	0.194179	OK	0.0806782	0	0.180057	OK
Accn1	-	-	Accn1	Accn1	TSS18555,TSS20539	chr11:80693666-81781898	-	-	0.5385	0.291412	0.785589	OK	1.2026	0.835366	1.56983	OK	0	0	0	OK
Accn2	-	-	Accn2	Accn2	TSS5099	chr15:99501148-99531559	-	-	9.62529	8.11518	11.1354	OK	7.72818	6.51649	8.93987	OK	6.0236	5.06642	6.98079	OK
Accn3	-	-	Accn3	Accn3	TSS11367	chr5:23919268-23923652	-	-	0.0133789	0	0.0322387	OK	0.0401904	0.0034629	0.0769179	OK	0.0321162	0.000784054	0.0634483	OK
Accn4	-	-	Accn4	Accn4	TSS11379	chr1:75447084-75470915	-	-	0.0421883	0.00634927	0.0780274	OK	0.0183105	0	0.0379418	OK	0.0955797	0.0355685	0.155591	OK
Accn5	-	-	Accn5	Accn5	TSS19028	chr3:81800843-81825155	-	-	0.00294243	0	0.0126032	OK	0	0	0	OK	0	0	0	OK
Accs	-	-	Accs	Accs	TSS22932	chr2:93675609-93689933	-	-	1.8389	1.31517	2.36262	OK	2.05826	1.5241	2.59241	OK	3.33742	2.62357	4.05127	OK
Accsl	-	-	Accsl	Accsl	TSS1617	chr2:93695519-93709260	-	-	0.0138125	0	0.0322291	OK	0.00493397	0	0.014519	OK	0.0124277	0	0.0277361	OK
Acd	-	-	Acd	Acd	TSS11918	chr8:108214805-108224995	-	-	18.2436	14.9979	21.4893	OK	13.0186	10.6405	15.3968	OK	51.1184	41.2272	61.0095	OK
Ace	-	-	Ace	Ace	TSS10517,TSS19283	chr11:105829260-105851259	-	-	0.155078	0.0681424	0.242013	OK	6.00994	5.02629	6.99359	OK	0.303821	0.151304	0.456338	OK
Ace2	-	-	Ace2	Ace2	TSS4277,TSS7725	chrX:160577273-160626350	-	-	2.20767	1.71914	2.6962	OK	7.62049	6.42819	8.81278	OK	0.0224172	0.0019336	0.0429009	OK
Acer1	-	-	Acer1	Acer1	TSS22195	chr17:57092912-57121549	-	-	0	0	0	OK	0	0	0	OK	0	0	0	OK
Acer2	-	-	Acer2	Acer2	TSS8015	chr4:86520317-86566785	-	-	0.0758179	0.0294642	0.122172	OK	0.852837	0.628121	1.07755	OK	0.0267484	0.00587084	0.0476259	OK
Acer3	-	-	Acer3	Acer3	TSS8639	chr7:105362169-105458037	-	-	1.09838	0.808242	1.38853	OK	1.10866	0.853819	1.3635	OK	0.911691	0.683597	1.13979	OK
Ache	-	-	Ache	Ache	TSS14383	chr5:137729504-137735691	-	-	1.82782	1.32158	2.33407	OK	6.46743	5.32804	7.60681	OK	19.8886	16.7735	23.0038	OK
Acin1	-	-	Acin1	Acin1	TSS1789,TSS19463,TSS4321	chr14:55260997-55309579	-	-	26.4952	20.9284	32.0619	OK	21.0892	16.8496	25.3288	OK	38.1301	29.6815	46.5787	OK
Acly	-	-	Acly	Acly	TSS7273	chr11:100337665-100389314	-	-	395.797	99.2338	692.36	OK	280.573	102.13	459.015	OK	591.462	0	1416.72	OK
Acmsd	-	-	Acmsd	Acmsd	TSS4264	chr1:129625989-129664141	-	-	0.00983215	0	0.0260784	OK	0.0153238	0	0.0325076	OK	0.0120092	0	0.0268019	OK
Acn9	-	-	Acn9	Acn9	TSS15943	chr6:6906017-6989220	-	-	2.90318	1.7358	4.07056	OK	2.21903	1.31087	3.12719	OK	3.72771	2.38372	5.0717	OK
Acnat1	-	-	Acnat1	Acnat1	TSS22587	chr4:49456403-49463981	-	-	0.0140487	0	0.0288163	OK	0.154699	0.0898085	0.21959	OK	0	0	0	OK
Acnat2	-	-	Acnat2	Acnat2	TSS7811	chr4:49392716-49421023	-	-	0	0	0	OK	0	0	0	OK	0	0	0	OK
Aco1	-	-	Aco1	Aco1	TSS7352	chr4:40090297-40146042	-	-	7.68251	6.47503	8.89	OK	7.07747	5.97036	8.18459	OK	13.08	10.9627	15.1974	OK
Aco2	-	-	Aco2	Aco2	TSS21403	chr15:81702892-81756643	-	-	41.9748	34.1213	49.8282	OK	31.2285	25.5663	36.8907	OK	74.8471	56.4442	93.2499	OK
Acot1	-	-	Acot1	Acot1	TSS7400	chr12:85350451-85358619	-	-	0.268828	0.114936	0.42272	OK	0.660064	0.385495	0.934634	OK	0.00860458	0	0.0249923	OK
Acot10	-	-	Acot10	Acot10	TSS9386	chr15:20594968-20596505	-	-	1.45283	0.960563	1.94509	OK	1.09725	0.72873	1.46577	OK	5.79602	4.69285	6.8992	OK
Acot11	-	-	Acot11	Acot11	TSS11251	chr4:106406519-106472436	-	-	6.82176	1.46858	12.1749	OK	4.93295	1.5613	8.30461	OK	5.44093	4.56293	6.31893	OK
Acot12	-	-	Acot12	Acot12	TSS8506	chr13:91600701-91925753	-	-	0.294492	0.0796179	0.509367	OK	0.148122	0.0117595	0.284485	OK	0.0966933	0.000874728	0.192512	OK
Acot13	-	-	Acot13	Acot13	TSS5693	chr13:24909823-24923358	-	-	26.7299	22.0301	31.4298	OK	18.1906	14.8419	21.5392	OK	54.9662	46.354	63.5783	OK
Acot2	-	-	Acot2	Acot2	TSS15644	chr12:85328810-85334825	-	-	2.0236	1.48155	2.56565	OK	2.30652	1.74535	2.86768	OK	1.38882	0.980788	1.79686	OK
Acot3	-	-	Acot3	Acot3	TSS22190	chr12:85393100-85400514	-	-	0.0106681	0	0.0258557	OK	0.0744815	0.0241096	0.124853	OK	0	0	0	OK
Acot4	-	-	Acot4	Acot4	TSS1237	chr12:85379328-85385673	-	-	0.153149	0.0610089	0.245288	OK	0.197155	0.0939333	0.300377	OK	7.42519e-05	0	0.0012806	OK
Acot5	-	-	Acot5	Acot5	TSS20244	chr12:85410274-85416969	-	-	0.0795098	0.0113375	0.147682	OK	0.107548	0.0272719	0.187824	OK	0	0	0	OK
Acot6	-	-	Acot6	Acot6	TSS5282	chr12:85441603-85450733	-	-	1.37372	0.92213	1.82531	OK	1.3321	0.906435	1.75777	OK	0	0	0	OK
Acot7	-	-	Acot7	Acot7	TSS10189,TSS11592,TSS5335	chr4:151552208-151645964	-	-	0.181882	0	0.366193	OK	1.55444	1.01852	2.09036	OK	0.0232971	0	0.0599846	OK
Acot8	-	-	Acot8	Acot8	TSS8324	chr2:164611520-164630381	-	-	5.89722	4.18775	7.60669	OK	4.11458	2.81222	5.41693	OK	12.484	9.74395	15.224	OK
Acot9	-	-	Acot9	Acot9	TSS15590	chrX:151697042-151732050	-	-	0.751739	0.439323	1.06415	OK	0.615899	0.367124	0.864675	OK	3.89457	3.04771	4.74143	OK
Acox1	-	-	Acox1	Acox1	TSS18686	chr11:116033201-116076632	-	-	21.6364	17.7644	25.5083	OK	20.6449	16.9277	24.362	OK	30.2122	23.9306	36.4939	OK
Acox2	-	-	Acox2	Acox2	TSS12263,TSS16124	chr14:9058024-9091533	-	-	0.00385356	0	0.0186015	OK	0.0197652	0	0.0430666	OK	0.083725	0.0306927	0.136757	OK
Acox3	-	-	Acox3	Acox3	TSS17348	chr5:35925708-35956450	-	-	5.23793	4.37424	6.10162	OK	5.05952	4.24461	5.87444	OK	3.99014	3.32997	4.65031	OK
Acoxl	-	-	Acoxl	Acoxl	TSS2087	chr2:127680363-127949628	-	-	0.0777836	0.0246711	0.130896	OK	0.070554	0.0238804	0.117228	OK	0.284099	0.162968	0.405229	OK
Acp1	-	-	Acp1	Acp1	TSS18154	chr12:31569188-31596477	-	-	5.28398	4.20264	6.36532	OK	3.59439	2.92992	4.25886	OK	11.974	10.0929	13.855	OK
Acp2	-	-	Acp2	Acp2	TSS666	chr2:91043068-91077223	-	-	12.8131	10.7085	14.9178	OK	10.1303	8.44637	11.8141	OK	7.79612	6.49252	9.09973	OK
Acp5	-	-	Acp5	Acp5	TSS18642,TSS19533,TSS3792	chr9:21931170-21940190	-	-	0.104566	0.0135863	0.195547	OK	0.422475	0.18825	0.656701	OK	0	0	0	OK
Acp6	-	-	Acp6	Acp6	TSS496	chr3:96962699-96980499	-	-	4.76515	3.75246	5.77783	OK	4.16396	3.28672	5.04119	OK	6.48281	5.298	7.66763	OK
Acpl2	-	-	Acpl2	Acpl2	TSS8429	chr9:96723761-96789841	-	-	4.89884	4.02932	5.76836	OK	5.22809	4.3609	6.09528	OK	12.2316	10.3149	14.1482	OK
Acpp	-	-	Acpp	Acpp	TSS10295	chr9:104190569-104240052	-	-	0.00944312	0	0.0206202	OK	0.0536554	0.0202183	0.0870925	OK	0	0	0	OK
Acpt	-	-	Acpt	Acpt	TSS11880	chr7:51508456-51512574	-	-	0.0103924	0	0.0309981	OK	0.0101594	0	0.0298956	OK	0	0	0	OK
Acr	-	-	Acr	Acr	TSS21397	chr15:89398756-89405015	-	-	0.102122	0.0230298	0.181214	OK	0.259923	0.118821	0.401025	OK	0.0771432	0.0169317	0.137355	OK
Acrbp	-	-	Acrbp	Acrbp	TSS13645	chr6:124999944-125013283	-	-	2.06035	1.28598	2.83471	OK	2.39847	1.64849	3.14844	OK	0.730658	0.368374	1.09294	OK
Acrv1	-	-	Acrv1	Acrv1	TSS950	chr9:36500804-36506422	-	-	0	0	0	OK	0.00524689	0	0.0196619	OK	0.053644	0.00130961	0.105978	OK
Acsbg1	-	-	Acsbg1	Acsbg1	TSS10676	chr9:54452803-54509692	-	-	0.0297081	0.00172927	0.057687	OK	0.118695	0.0506475	0.186743	OK	2.36387	1.85905	2.8687	OK
Acsbg2	-	-	Acsbg2	Acsbg2	TSS20943	chr17:56982526-57013870	-	-	0	0	0	OK	0	0	0	OK	0.0106776	0	0.0238302	OK
Acsf2	-	-	Acsf2	Acsf2	TSS18158	chr11:94418415-94463100	-	-	1.7493	1.32229	2.1763	OK	1.52192	1.15575	1.88809	OK	0.0909714	0.0365808	0.145362	OK
Acsf3	-	-	Acsf3	Acsf3	TSS23586	chr8:125299404-125341781	-	-	10.4101	8.71708	12.1031	OK	8.26404	6.89973	9.62834	OK	8.71584	7.29236	10.1393	OK
Acsl1	-	-	Acsl1	Acsl1	TSS11150	chr8:47556395-47621404	-	-	4.7181	3.92411	5.5121	OK	4.28041	3.57854	4.98228	OK	2.92439	2.40673	3.44205	OK
Acsl3	-	-	Acsl3	Acsl3	TSS2897	chr1:78654399-78704318	-	-	1.85929	1.48763	2.23094	OK	1.98377	1.56904	2.3985	OK	3.04165	2.43961	3.64369	OK
Acsl4	-	-	Acsl4	Acsl4	TSS20108	chrX:138752535-138825078	-	-	10.1703	8.38538	11.9552	OK	7.32536	6.10827	8.54245	OK	5.67289	4.76544	6.58034	OK
Acsl5	-	-	Acsl5	Acsl5	TSS105	chr19:55327858-55371118	-	-	14.3971	12.136	16.6583	OK	10.8162	9.125	12.5074	OK	53.6511	42.2604	65.0417	OK
Acsl6	-	-	Acsl6	Acsl6	TSS13559,TSS15182,TSS21927	chr11:54117325-54175041	-	-	4.87001	3.82274	5.91727	OK	4.5517	3.68151	5.42189	OK	5.80536	4.75279	6.85792	OK
Acsm1	-	-	Acsm1	Acsm1	TSS15541	chr7:126761341-126806029	-	-	0	0	0	OK	0	0	0	OK	0	0	0	OK
Acsm2	-	-	Acsm2	Acsm2	TSS16691,TSS6524	chr7:126697853-126744208	-	-	0	0	0	OK	0	0	0	OK	0	0	0	OK
Acsm3	-	-	Acsm3	Acsm3	TSS6108	chr7:126904436-126937572	-	-	0.013786	0	0.0909466	OK	0.0288843	0	0.150901	OK	0	0	0	OK
Acsm4	-	-	Acsm4	Acsm4	TSS16282	chr7:126833539-126858080	-	-	0	0	0	OK	0	0	0	OK	0	0	0	OK
Acsm5	-	-	Acsm5	Acsm5	TSS5384	chr7:126669778-126686874	-	-	0	0	0	OK	0	0	0	OK	0	0	0	OK
Acss1	-	-	Acss1	Acss1	TSS17003	chr2:150443846-150493976	-	-	0.0485484	0.0111958	0.0859009	OK	0.494503	0.327983	0.661024	OK	0	0	0	OK
Acss2	-	-	Acss2	Acss2	TSS5871	chr2:155343778-155388479	-	-	16.3725	13.8088	18.9361	OK	10.093	8.50949	11.6764	OK	7.10967	5.96984	8.24949	OK
Acss3	-	-	Acss3	Acss3	TSS5575	chr10:106373219-106560720	-	-	0.0123526	0	0.0338451	OK	0.0716633	0.0160139	0.127313	OK	0	0	0	OK
Acta1	-	-	Acta1	Acta1	TSS24162	chr8:126415666-126418636	-	-	0.406379	0.197486	0.615272	OK	0.310144	0.144728	0.47556	OK	1.86785	1.31144	2.42425	OK
Acta2	-	-	Acta2	Acta2	TSS4297	chr19:34315580-34329826	-	-	0.118982	0.0325421	0.205421	OK	5.70091	4.64491	6.75691	OK	0	0	0	OK
Actb	-	-	Actb	Actb	TSS20020	chr5:143664794-143668403	-	-	193.182	136.143	250.221	OK	96.4833	75.8721	117.094	OK	478.55	245.481	711.618	OK
Actbl2	-	-	Actbl2	Actbl2	TSS16245	chr13:112045220-112047957	-	-	0	0	0	OK	0	0	0	OK	0	0	0	OK
Actc1	-	-	Actc1	Actc1	TSS16708	chr2:113873024-113878547	-	-	0.311358	0.136012	0.486704	OK	0.234333	0.0992517	0.369415	OK	0.0838821	0.0184108	0.149353	OK
Actg1	-	-	Actg1	Actg1	TSS4647	chr11:120207003-120209798	-	-	280.843	189.759	371.926	OK	137.723	103.941	171.504	OK	218.814	150.642	286.986	OK
Actg2	-	-	Actg2	Actg2	TSS16224	chr6:83462902-83486245	-	-	0.0148951	0	0.0405566	OK	0.433813	0.224045	0.64358	OK	0.0217806	0	0.0486098	OK
Actl6a	-	-	Actl6a	Actl6a	TSS17876	chr3:32607467-32625893	-	-	8.34709	6.88951	9.80466	OK	6.73824	5.56245	7.91403	OK	22.2568	18.7542	25.7593	OK
Actl6b	-	-	Actl6b	Actl6b	TSS22736	chr5:137994782-138010801	-	-	8.00784	6.51389	9.5018	OK	6.03934	4.86289	7.21579	OK	6.66961	5.42166	7.91757	OK
Actl7a	-	-	Actl7a	Actl7a	TSS2453	chr4:56756293-56757797	-	-	0.0172656	0	0.0416043	OK	0.0301269	0	0.0624269	OK	0.0375284	0.000916182	0.0741406	OK
Actl7b	-	-	Actl7b	Actl7b	TSS11258	chr4:56752876-56754297	-	-	0.00348462	0	0.0149255	OK	0.00460385	0	0.0172522	OK	0.0711409	0.0102841	0.131998	OK
Actl9	-	-	Actl9	Actl9	TSS8452	chr17:33569843-33571212	-	-	0.00673357	0	0.0223662	OK	0.0262127	0	0.0571894	OK	0	0	0	OK
Actn1	-	-	Actn1	Actn1	TSS7182	chr12:81268528-81361358	-	-	19.6196	16.4211	22.8181	OK	15.9491	13.347	18.5513	OK	44.1115	34.7949	53.4282	OK
Actn2	-	-	Actn2	Actn2	TSS10318	chr13:12361693-12432999	-	-	2.00845	1.53733	2.47957	OK	0.820472	0.572239	1.0687	OK	0	0	0	OK
Actn3	-	-	Actn3	Actn3	TSS21451	chr19:4861222-4877884	-	-	0.167585	0.0772924	0.257878	OK	0.0869149	0.0325232	0.141306	OK	0.376598	0.228057	0.52514	OK
Actn4	-	-	Actn4	Actn4	TSS9222	chr7:29666674-29747299	-	-	42.4658	34.0654	50.8662	OK	37.0773	29.6085	44.5461	OK	101.745	70.0823	133.408	OK
Actr10	-	-	Actr10	Actr10	TSS13380	chr12:72038843-72065704	-	-	14.5911	12.2753	16.9069	OK	10.3625	8.72624	11.9987	OK	17.8357	14.8342	20.8372	OK
Actr1a	-	-	Actr1a	Actr1a	TSS12962	chr19:46451303-46470225	-	-	24.9781	20.9582	28.9981	OK	18.9697	15.9468	21.9925	OK	52.8982	42.3164	63.48	OK
Actr1b	-	-	Actr1b	Actr1b	TSS22019	chr1:36756046-36766770	-	-	33.834	28.3826	39.2855	OK	23.087	19.4454	26.7287	OK	53.5854	43.862	63.3088	OK
Actr2	-	-	Actr2	Actr2	TSS6389	chr11:19962306-20012954	-	-	21.7501	18.1956	25.3046	OK	18.861	15.6908	22.0312	OK	15.5797	13.0528	18.1066	OK
Actr3	-	-	Actr3	Actr3	TSS655	chr1:127289482-127332067	-	-	18.0462	15.2228	20.8695	OK	15.5453	13.1058	17.9847	OK	17.9347	15.1012	20.7681	OK
Actr3b	-	-	Actr3b	Actr3b	TSS1698	chr5:25265843-25356159	-	-	2.60588	1.91026	3.30151	OK	2.02961	1.47894	2.58028	OK	6.88969	5.65691	8.12247	OK
Actr5	-	-	Actr5	Actr5	TSS18281	chr2:158450648-158464947	-	-	3.38225	2.65227	4.11223	OK	2.64238	2.03808	3.24669	OK	5.43299	4.44516	6.42083	OK
Actr6	-	-	Actr6	Actr6	TSS4641	chr10:89174717-89195040	-	-	2.92821	2.17273	3.68369	OK	2.10833	1.56884	2.64783	OK	2.14041	1.57947	2.70136	OK
Actr8	-	-	Actr8	Actr8	TSS15061	chr14:30791522-30806407	-	-	12.9127	10.85	14.9755	OK	9.12206	7.64475	10.5994	OK	14.8781	12.5514	17.2049	OK
Actrt1	-	-	Actrt1	Actrt1	TSS6927	chrX:43682183-43683522	-	-	0	0	0	OK	0	0	0	OK	0	0	0	OK
Actrt2	-	-	Actrt2	Actrt2	TSS20560	chr4:154040536-154041976	-	-	0	0	0	OK	0	0	0	OK	0	0	0	OK
Acvr1	-	-	Acvr1	Acvr1	TSS14882	chr2:58298848-58419239	-	-	7.69734	6.22143	9.17325	OK	6.20287	5.16989	7.23585	OK	6.86278	5.75765	7.96792	OK
Acvr1b	-	-	Acvr1b	Acvr1b	TSS17365	chr15:101004555-101043032	-	-	6.66778	5.57346	7.76211	OK	7.07854	5.94897	8.2081	OK	2.82087	2.27805	3.36368	OK
Acvr1c	-	-	Acvr1c	Acvr1c	TSS2145,TSS5577	chr2:58119863-58210169	-	-	3.6165	3.01171	4.22128	OK	3.19642	2.67878	3.71407	OK	1.00989	0.829709	1.19006	OK
Acvr2a	-	-	Acvr2a	Acvr2a	TSS12401	chr2:48669628-48804787	-	-	6.89353	5.44985	8.33721	OK	6.73392	5.34859	8.11925	OK	1.89479	1.45376	2.33581	OK
Acvr2b	-	-	Acvr2b	Acvr2b	TSS12613	chr9:119311618-119342624	-	-	3.38728	2.56043	4.21414	OK	3.79241	2.9337	4.65112	OK	2.20383	1.60483	2.80284	OK
Acvrl1	-	-	Acvrl1	Acvrl1	TSS24098	chr15:100958967-100975767	-	-	0.0678293	0.0224712	0.113187	OK	3.1712	2.59745	3.74495	OK	0.0161979	0.00039544	0.0320003	OK
Acy1	-	-	Acy1	Acy1	TSS22620	chr9:106335326-106340567	-	-	3.09778	2.26302	3.93253	OK	2.36765	1.6991	3.0362	OK	5.49193	4.34509	6.63876	OK
Acy3	-	-	Acy3	Acy3	TSS16106	chr19:3986660-3990005	-	-	0.0215122	0	0.0503437	OK	0.296274	0.13892	0.453627	OK	0.122873	0.0384634	0.207283	OK
Acyp1	-	-	Acyp1	Acyp1	TSS17523	chr12:86613347-86621385	-	-	9.35784	6.94159	11.7741	OK	6.78289	4.96718	8.59861	OK	11.5674	8.87369	14.2612	OK
Acyp2	-	-	Acyp2	Acyp2	TSS21989	chr11:30405991-30549396	-	-	13.6851	10.6838	16.6865	OK	6.83871	5.12422	8.5532	OK	9.83766	7.57011	12.1052	OK
Ada	-	-	Ada	Ada	TSS16177	chr2:163552319-163575913	-	-	0.658893	0.379088	0.938698	OK	0.518635	0.296147	0.741123	OK	0.760384	0.474529	1.04624	OK
Adad1	-	-	Adad1	Adad1	TSS10326	chr3:36962577-37010434	-	-	0	0	0	OK	0.00534384	0	0.0157251	OK	0	0	0	OK
Adad2	-	-	Adad2	Adad2	TSS5476	chr8:122136646-122140826	-	-	0.00189326	0	0.00910979	OK	0	0	0	OK	0	0	0	OK
Adal	-	-	Adal	Adal	TSS16384	chr2:120967876-120982414	-	-	4.40966	3.53794	5.28139	OK	3.35663	2.70079	4.01248	OK	3.50343	2.82859	4.17827	OK
Adam10	-	-	Adam10	Adam10	TSS17262	chr9:70526807-70628036	-	-	11.5244	9.70866	13.3402	OK	11.9717	10.027	13.9164	OK	10.2062	8.57956	11.8329	OK
Adam11	-	-	Adam11	Adam11	TSS19634	chr11:102622752-102641576	-	-	0.0630175	0.0237486	0.102286	OK	0.436451	0.297677	0.575225	OK	0.116995	0.0616172	0.172374	OK
Adam12	-	-	Adam12	Adam12	TSS5345	chr7:141074882-141416780	-	-	0.0110246	0.000554551	0.0214947	OK	0.292135	0.20375	0.38052	OK	0.00666869	0.000162803	0.0131746	OK
Adam15	-	-	Adam15	Adam15	TSS14452	chr3:89143561-89153932	-	-	3.76608	2.94733	4.58483	OK	6.58392	5.38639	7.78144	OK	31.3622	25.2956	37.4287	OK
Adam17	-	-	Adam17	Adam17	TSS19477	chr12:21322252-21379452	-	-	4.18567	3.37691	4.99443	OK	4.29877	3.53053	5.06701	OK	3.45971	2.52872	4.39069	OK
Adam18	-	-	Adam18	Adam18	TSS11800	chr8:25712717-25785227	-	-	0.0015227	0	0.00732674	OK	0	0	0	OK	0	0	0	OK
Adam19	-	-	Adam19	Adam19	TSS1916	chr11:45869488-45960844	-	-	0.0250546	0.00585134	0.044258	OK	0.273317	0.18227	0.364364	OK	0	0	0	OK
Adam1a	-	-	Adam1a	Adam1a	TSS21018	chr5:121968612-121971704	-	-	0.536771	0.340207	0.733336	OK	1.16656	0.855575	1.47754	OK	0.785264	0.549192	1.02134	OK
Adam1b	-	-	Adam1b	Adam1b	TSS15140	chr5:121950105-121952989	-	-	0.090859	0.0319557	0.149762	OK	0.179764	0.0913713	0.268157	OK	0.05312	0.0151958	0.0910443	OK
Adam2	-	-	Adam2	Adam2	TSS13127	chr14:66646165-66696570	-	-	0.00140226	0	0.00674725	OK	0	0	0	OK	0	0	0	OK
Adam21	-	-	Adam21	Adam21	TSS19147	chr12:82659570-82669461	-	-	0.0236694	0.000108985	0.0472298	OK	0.0291998	0.00424313	0.0541564	OK	0.0559537	0.0175154	0.0943921	OK
Adam22	-	-	Adam22	Adam22	TSS18097	chr5:8072351-8368081	-	-	8.25065	6.76558	9.73572	OK	8.64124	6.95084	10.3316	OK	4.85552	4.07809	5.63295	OK
Adam23	-	-	Adam23	Adam23	TSS4210	chr1:63492477-63643089	-	-	0.335445	0.160564	0.510326	OK	0.728851	0.47643	0.981272	OK	5.09644	4.11141	6.08147	OK
Adam24	-	-	Adam24	Adam24	TSS20172	chr8:41760447-41767553	-	-	0	0	0	OK	0	0	0	OK	0	0	0	OK
Adam25	-	-	Adam25	Adam25	TSS7022	chr8:41837561-41841530	-	-	0	0	0	OK	0.00193975	0	0.00726891	OK	0	0	0	OK
Adam26a	-	-	Adam26a	Adam26a	TSS22851	chr8:44653629-44662061	-	-	0	0	0	OK	0	0	0	OK	0	0	0	OK
Adam26b	-	-	Adam26b	Adam26b	TSS17583	chr8:44605217-44613491	-	-	0	0	0	OK	0	0	0	OK	0	0	0	OK
Adam28	-	-	Adam28	Adam28	TSS18509	chr14:69224083-69273899	-	-	0.00167827	0	0.0137564	OK	0.00329822	0	0.0120998	OK	0	0	0	OK
Adam29	-	-	Adam29	Adam29	TSS8814	chr8:58349708-58385761	-	-	0	0	0	OK	0	0	0	OK	0	0	0	OK
Adam3	-	-	Adam3	Adam3	TSS16648	chr8:25787705-25836297	-	-	0.00436424	0	0.0135106	OK	0	0	0	OK	0	0	0	OK
Adam30	-	-	Adam30	Adam30	TSS7626	chr3:97964734-97967096	-	-	0	0	0	OK	0.00232899	0	0.00872753	OK	0	0	0	OK
Adam32	-	-	Adam32	Adam32	TSS1678	chr8:25946614-26059276	-	-	0.627431	0.391556	0.863306	OK	0.353505	0.208565	0.498445	OK	0.0112387	0	0.0250825	OK
Adam33	-	-	Adam33	Adam33	TSS15438	chr2:130876552-130889550	-	-	0.00516728	0	0.0166682	OK	0.411919	0.253372	0.570465	OK	0	0	0	OK
Adam34	-	-	Adam34	Adam34	TSS12758	chr8:44735662-44750914	-	-	0	0	0	OK	0	0	0	OK	0	0	0	OK
Adam39	-	-	Adam39	Adam39	TSS7821	chr8:41908362-41912215	-	-	0.00193271	0	0.00837437	OK	0.0042484	0	0.0125016	OK	0	0	0	OK
Adam4	-	-	Adam4	Adam4	TSS8946	chr12:82520535-82522865	-	-	0.268084	0.13455	0.401618	OK	0.582906	0.374071	0.791741	OK	0.107483	0.0424313	0.172535	OK
Adam5	-	-	Adam5	Adam5	TSS16350	chr8:25843456-25934841	-	-	0.138348	0.0574668	0.219229	OK	0.159109	0.0793322	0.238885	OK	0	0	0	OK
Adam6a	-	-	Adam6a	Adam6a	TSS9228	chr12:114782118-114784625	-	-	0	0	0	OK	0	0	0	OK	0	0	0	OK
Adam6b	-	-	Adam6b	Adam6b	TSS1361	chr12:114727775-114730046	-	-	0	0	0	OK	0	0	0	OK	0	0	0	OK
Adam7	-	-	Adam7	Adam7	TSS15748	chr14:69115393-69151746	-	-	0.308891	0.179665	0.438117	OK	0.206289	0.118165	0.294414	OK	0.00749296	0	0.0167227	OK
Adam8	-	-	Adam8	Adam8	TSS21122	chr7:147164839-147178387	-	-	0.235485	0.124465	0.346505	OK	0.201076	0.106684	0.295467	OK	0.263775	0.152523	0.375027	OK
Adam9	-	-	Adam9	Adam9	TSS23511	chr8:26060082-26127394	-	-	15.2137	12.7965	17.631	OK	13.2246	11.1008	15.3484	OK	11.0008	9.26219	12.7394	OK
Adamdec1	-	-	Adamdec1	Adamdec1	TSS21929	chr14:69181443-69200129	-	-	0.0117505	0	0.0281074	OK	0.00623661	0	0.016129	OK	0	0	0	OK
Adamts1	-	-	Adamts1	Adamts1	TSS23228	chr16:85794072-85803360	-	-	0.117059	0.0562798	0.177838	OK	1.78895	1.44542	2.13247	OK	0.00573775	0	0.0128054	OK
Adamts10	-	-	Adamts10	Adamts10	TSS11951	chr17:33661168-33690421	-	-	0.138599	0.0660999	0.211097	OK	0.873714	0.627167	1.12026	OK	0.427208	0.278788	0.575629	OK
Adamts12	-	-	Adamts12	Adamts12	TSS9812	chr15:10994544-11276622	-	-	0.017379	0.00262975	0.0321283	OK	0.182272	0.113713	0.250831	OK	0	0	0	OK
Adamts13	-	-	Adamts13	Adamts13	TSS19789	chr2:26828935-26865145	-	-	0.0109994	0	0.0230226	OK	0.021927	0.00354652	0.0403076	OK	0	0	0	OK
Adamts14	-	-	Adamts14	Adamts14	TSS16823	chr10:60659859-60736186	-	-	0.00260324	0	0.00758734	OK	0.0201702	0.00356812	0.0367722	OK	0.00563746	0	0.0125816	OK
Adamts15	-	-	Adamts15	Adamts15	TSS19943	chr9:30706739-30730037	-	-	0.0356175	0.0106517	0.0605834	OK	0.324068	0.216427	0.43171	OK	0	0	0	OK
Adamts16	-	-	Adamts16	Adamts16	TSS21201	chr13:70866685-70980688	-	-	0.00546531	0	0.0138141	OK	0.111601	0.0582908	0.164911	OK	0	0	0	OK
Adamts17	-	-	Adamts17	Adamts17	TSS9403	chr7:73984620-74297511	-	-	1.13218	0.88077	1.38359	OK	1.04957	0.824196	1.27494	OK	1.9139	1.57866	2.24914	OK
Adamts18	-	-	Adamts18	Adamts18	TSS14474	chr8:116222036-116372739	-	-	0.142851	0.0736241	0.212077	OK	0.945385	0.717152	1.17362	OK	0	0	0	OK
Adamts19	-	-	Adamts19	Adamts19	TSS7759	chr18:58996417-59213332	-	-	0.00102263	0	0.00438016	OK	0.00461404	0	0.0109522	OK	0	0	0	OK
Adamts2	-	-	Adamts2	Adamts2	TSS23651	chr11:50415586-50617551	-	-	0.0804354	0.0307355	0.130135	OK	0.657212	0.453043	0.86138	OK	0.0648633	0.0241379	0.105589	OK
Adamts20	-	-	Adamts20	Adamts20	TSS18942	chr15:94100593-94234781	-	-	0.00381289	0	0.0101095	OK	0.0122077	0	0.0278834	OK	0	0	0	OK
Adamts3	-	-	Adamts3	Adamts3	TSS21622	chr5:90102865-90312359	-	-	0.00104711	0	0.00570827	OK	0.0132135	0	0.0267451	OK	0	0	0	OK
Adamts4	-	-	Adamts4	Adamts4	TSS3429	chr1:173180552-173190053	-	-	0.0628482	0.020476	0.10522	OK	0.23665	0.134914	0.338385	OK	1.32553	1.00655	1.64452	OK
Adamts5	-	-	Adamts5	Adamts5	TSS8004	chr16:85858401-85901370	-	-	0.00413284	0	0.00935331	OK	0.218527	0.147349	0.289705	OK	0.0440433	0.0202566	0.0678301	OK
Adamts6	-	-	Adamts6	Adamts6	TSS1181	chr13:105077952-105284843	-	-	1.13522	0.858665	1.41177	OK	1.16001	0.907308	1.41272	OK	0.252904	0.160497	0.345312	OK
Adamts7	-	-	Adamts7	Adamts7	TSS23115	chr9:90057815-90094940	-	-	0.00469542	0	0.0118744	OK	0.217289	0.132999	0.301579	OK	0.217298	0.134991	0.299605	OK
Adamts8	-	-	Adamts8	Adamts8	TSS5031	chr9:30750147-30770443	-	-	0.0192659	0.000101191	0.0384307	OK	0.105634	0.047485	0.163784	OK	0	0	0	OK
Adamts9	-	-	Adamts9	Adamts9	TSS21516	chr6:92722692-92851435	-	-	0.0351949	0.0107566	0.0596331	OK	0.551504	0.403787	0.699221	OK	0.0137525	0.00198806	0.0255169	OK
Adamtsl1	-	-	Adamtsl1	Adamtsl1	TSS14112	chr4:85699818-86074286	-	-	0.00743652	0	0.0151873	OK	0.147653	0.0915595	0.203746	OK	0	0	0	OK
Adamtsl2	-	-	Adamtsl2	Adamtsl2	TSS4364	chr2:26934900-26964133	-	-	0.0139306	0	0.0304275	OK	0.889361	0.630112	1.14861	OK	0.00885592	0	0.0197645	OK
Adamtsl3	-	-	Adamtsl3	Adamtsl3	TSS18761	chr7:89484203-89762958	-	-	0.00170899	0	0.00513473	OK	0.0568796	0.0275109	0.0862482	OK	0	0	0	OK
Adamtsl4	-	-	Adamtsl4	Adamtsl4	TSS19890	chr3:95480126-95491781	-	-	0.486252	0.317498	0.655007	OK	0.815154	0.586174	1.04413	OK	1.00651	0.750011	1.26301	OK
Adamtsl5	-	-	Adamtsl5	Adamtsl5	TSS20726,TSS7390	chr10:79803460-79811191	-	-	0.0428808	0	0.0935282	OK	0.394133	0.135793	0.652474	OK	2.65226	1.71393	3.5906	OK
Adap1	-	-	Adap1	Adap1	TSS81	chr5:139747829-139801418	-	-	0.0719184	0.0183195	0.125517	OK	0.281607	0.151225	0.411989	OK	0	0	0	OK
Adap2	-	-	Adap2	Adap2	TSS20606	chr11:79967663-79992329	-	-	0.0195138	0	0.045532	OK	0.91396	0.583913	1.24401	OK	0	0	0	OK
Adar	-	-	Adar	Adar	TSS19733,TSS7032	chr3:89518943-89568554	-	-	12.8931	9.85466	15.9316	OK	12.0041	8.99114	15.0172	OK	7.98819	6.07008	9.90629	OK
Adarb1	-	-	Adarb1	Adarb1	TSS9884	chr10:76753471-76881018	-	-	7.76773	6.55631	8.97916	OK	8.31949	6.92595	9.71303	OK	5.30788	4.41532	6.20044	OK
Adarb2	-	-	Adarb2	Adarb2	TSS13932	chr13:8202154-8759554	-	-	2.2967	1.87568	2.71773	OK	1.32672	1.06272	1.59071	OK	0	0	0	OK
Adat1	-	-	Adat1	Adat1	TSS1219	chr8:114490807-114516202	-	-	1.25123	0.908044	1.59442	OK	1.12173	0.825342	1.41812	OK	1.19624	0.892213	1.50028	OK
Adat2	-	-	Adat2	Adat2	TSS16307	chr10:13243647-13283182	-	-	1.0367	0.235738	1.83766	OK	1.1234	0.389707	1.8571	OK	2.81345	1.52692	4.09998	OK
Adat3	-	-	Adat3	Adat3	TSS4422	chr10:80065624-80078528	-	-	2.35688	0.677539	4.03622	OK	2.22487	0.804292	3.64545	OK	3.85972	0.871769	6.84767	OK
Adc	-	-	Adc	Adc	TSS23840	chr4:128609389-128639661	-	-	1.28817	0.865633	1.7107	OK	1.86354	1.33871	2.38838	OK	0.366967	0.195991	0.537944	OK
Adck1	-	-	Adck1	Adck1	TSS1724	chr12:89599244-89700162	-	-	3.92092	3.11059	4.73126	OK	2.68523	2.08299	3.28748	OK	5.95553	4.92816	6.9829	OK
Adck2	-	-	Adck2	Adck2	TSS20041	chr6:39523874-39538768	-	-	8.6426	7.27366	10.0115	OK	6.25359	5.25511	7.25207	OK	3.72139	3.07382	4.36897	OK
Adck3	-	-	Adck3	Adck3	TSS11132,TSS5710	chr1:181891219-182126151	-	-	10.1888	6.46228	13.9154	OK	8.29605	4.58587	12.0062	OK	0.260346	0	0.588219	OK
Adck4	-	-	Adck4	Adck4	TSS23734	chr7:28018031-28042968	-	-	12.1491	10.1989	14.0992	OK	9.907	8.30415	11.5099	OK	7.9663	6.63492	9.29768	OK
Adck5	-	-	Adck5	Adck5	TSS20040	chr15:76406788-76438021	-	-	13.5317	9.8449	17.2184	OK	8.88298	5.98726	11.7787	OK	6.89958	2.64382	11.1553	OK
Adcy1	-	-	Adcy1	Adcy1	TSS15842	chr11:6963491-7078508	-	-	0.053853	0.0278732	0.0798327	OK	0.243623	0.175233	0.312014	OK	0.0534603	0.0295561	0.0773646	OK
Adcy10	-	-	Adcy10	Adcy10	TSS21961	chr1:167415313-167506904	-	-	0.00153995	0	0.00537077	OK	0.00488849	0	0.0110405	OK	0	0	0	OK
Adcy2	-	-	Adcy2	Adcy2	TSS2118	chr13:68758919-69138419	-	-	0.0703584	0.0262606	0.114456	OK	0.188691	0.1074	0.269983	OK	0.0130765	0.000319238	0.0258338	OK
Adcy3	-	-	Adcy3	Adcy3	TSS10759,TSS22684	chr12:4133396-4234294	-	-	0.951404	0.646209	1.2566	OK	1.43166	1.08579	1.77753	OK	0.0476743	0	0.110651	OK
Adcy4	-	-	Adcy4	Adcy4	TSS17041	chr14:56387928-56402856	-	-	0.0219712	0	0.0443461	OK	1.46128	1.10788	1.81468	OK	0	0	0	OK
Adcy5	-	-	Adcy5	Adcy5	TSS195	chr16:35155721-35304635	-	-	0.0668865	0.0268008	0.106972	OK	0.637541	0.455605	0.819478	OK	0.0806004	0.03707	0.124131	OK
Adcy6	-	-	Adcy6	Adcy6	TSS19711	chr15:98420420-98438064	-	-	12.8175	10.72	14.915	OK	16.5691	13.6668	19.4714	OK	3.39602	2.84712	3.94492	OK
Adcy7	-	-	Adcy7	Adcy7	TSS1204,TSS15810,TSS5799,TSS6355	chr8:90796301-90853861	-	-	0.121979	0.0638445	0.180113	OK	0.549918	0.397315	0.702521	OK	0.448965	0.319134	0.578797	OK
Adcy8	-	-	Adcy8	Adcy8	TSS9766	chr15:64530596-64753858	-	-	0.06681	0.0262114	0.107409	OK	0.143046	0.0789837	0.207108	OK	0	0	0	OK
Adcy9	-	-	Adcy9	Adcy9	TSS15474	chr16:4287544-4419587	-	-	15.5349	13.0221	18.0477	OK	14.958	12.5025	17.4135	OK	17.0135	14.1392	19.8878	OK
Adcyap1	-	-	Adcyap1	Adcyap1	TSS15936	chr17:93598761-93604829	-	-	0.00475154	0	0.0158653	OK	0.0803826	0.0246583	0.136107	OK	0.044814	0.00647831	0.0831497	OK
Adcyap1r1	-	-	Adcyap1r1	Adcyap1r1	TSS8915	chr6:55401973-55451449	-	-	0.0328523	0.00873106	0.0569735	OK	0.64397	0.466317	0.821624	OK	0.00452923	0	0.0116948	OK
Add1	-	-	Add1	Add1	TSS15194	chr5:34916362-34974954	-	-	21.2319	17.5256	24.9381	OK	20.9585	17.1775	24.7395	OK	22.6033	18.2704	26.9362	OK
Add2	-	-	Add2	Add2	TSS19380	chr6:86028077-86069549	-	-	0.0939221	0.0358858	0.151958	OK	0.404942	0.254904	0.554981	OK	0	0	0	OK
Add3	-	-	Add3	Add3	TSS1147,TSS18262,TSS22409	chr19:53214934-53321889	-	-	9.19765	7.59677	10.7985	OK	9.63537	8.07521	11.1955	OK	3.12401	2.51797	3.73006	OK
Adh1	-	-	Adh1	Adh1	TSS22081	chr3:137940608-137953655	-	-	52.6979	44.2421	61.1536	OK	39.7284	33.4165	46.0403	OK	16.7985	14.1089	19.4881	OK
Adh4	-	-	Adh4	Adh4	TSS10099	chr3:138078460-138093856	-	-	0	0	0	OK	0	0	0	OK	0	0	0	OK
Adh5	-	-	Adh5	Adh5	TSS9388	chr3:138106127-138118463	-	-	12.5423	10.4192	14.6653	OK	10.2202	8.49941	11.941	OK	23.2194	19.5897	26.849	OK
Adh6-ps1	-	-	Adh6-ps1	Adh6-ps1	TSS23851	chr3:138037084-138051255	-	-	0	0	0	OK	0	0	0	OK	0	0	0	OK
Adh6a	-	-	Adh6a	Adh6a	TSS16263	chr3:137976249-137994098	-	-	0.178665	0.0476817	0.309649	OK	0.00898031	0	0.026426	OK	0	0	0	OK
Adh7	-	-	Adh7	Adh7	TSS20495	chr3:137880736-137895006	-	-	0.137987	0.049346	0.226629	OK	0.119632	0.0463241	0.192939	OK	0.0553671	0.0121522	0.098582	OK
Adhfe1	-	-	Adhfe1	Adhfe1	TSS6565	chr1:9538126-9621173	-	-	0.0324257	0.000451569	0.0643999	OK	0.165619	0.0665058	0.264732	OK	0.0508791	0.0133119	0.0884464	OK
Adi1	-	-	Adi1	Adi1	TSS9876	chr12:29360071-29367039	-	-	58.472	48.6298	68.3142	OK	43.4101	36.1565	50.6636	OK	56.9319	46.9094	66.9544	OK
Adig	-	-	Adig	Adig	TSS9423	chr2:158328347-158333934	-	-	0.00944975	0	0.0404756	OK	0.0121533	0	0.0455425	OK	0.0663398	0	0.148056	OK
Adipoq	-	-	Adipoq	Adipoq	TSS1869	chr16:23146608-23158041	-	-	0	0	0	OK	0	0	0	OK	0	0	0	OK
Adipor1	-	-	Adipor1	Adipor1	TSS11940	chr1:136312043-136328918	-	-	59.6564	49.1292	70.1835	OK	42.8012	35.5045	50.0978	OK	74.4612	59.6589	89.2635	OK
Adipor2	-	-	Adipor2	Adipor2	TSS19158	chr6:119303167-119367501	-	-	13.6076	11.4577	15.7576	OK	9.31455	7.85638	10.7727	OK	15.6315	13.0627	18.2004	OK
Adk	-	-	Adk	Adk	TSS19198	chr14:21871854-22267768	-	-	42.842	35.9301	49.754	OK	32.7604	27.4946	38.0261	OK	15.9027	13.3996	18.4058	OK
Adm	-	-	Adm	Adm	TSS17834	chr7:117771182-117773333	-	-	0.0263075	0	0.0595382	OK	0.0861211	0.0175719	0.15467	OK	0.511741	0.273312	0.75017	OK
Adm2	-	-	Adm2	Adm2	TSS21453	chr15:89153402-89155161	-	-	2.39296	1.59597	3.18994	OK	1.50126	0.948684	2.05383	OK	12.4688	10.2258	14.7119	OK
Adnp	-	-	Adnp	Adnp	TSS20271	chr2:168006464-168032562	-	-	17.5898	14.6599	20.5196	OK	16.8307	13.9024	19.7591	OK	13.2278	11.0311	15.4245	OK
Adnp2	-	-	Adnp2	Adnp2	TSS19237	chr18:80323873-80348221	-	-	5.93582	4.98094	6.8907	OK	5.36287	4.50933	6.21641	OK	6.95896	5.87025	8.04766	OK
Ado	-	-	Ado	Ado	TSS15433	chr10:67007258-67011703	-	-	3.5359	2.91712	4.15468	OK	2.72687	2.24896	3.20478	OK	8.67331	7.31334	10.0333	OK
Adora1	-	-	Adora1	Adora1	TSS17423,TSS7773	chr1:136090024-136132008	-	-	2.7326	2.17701	3.28818	OK	3.56544	2.99721	4.13367	OK	5.02223	4.14264	5.90182	OK
Adora2a	-	-	Adora2a	Adora2a	TSS3977	chr10:74779687-74797533	-	-	0.569041	0.349495	0.788586	OK	0.895337	0.607568	1.18311	OK	3.89191	3.14449	4.63933	OK
Adora2b	-	-	Adora2b	Adora2b	TSS4774	chr11:62062485-62079954	-	-	4.15739	3.23938	5.07541	OK	1.89639	1.37815	2.41463	OK	0.708264	0.442003	0.974525	OK
Adora3	-	-	Adora3	Adora3	TSS20376,TSS5869,TSS9385	chr3:105673775-105726960	-	-	9.69294	7.5059	11.88	OK	7.14521	5.45362	8.8368	OK	0	0	0	OK
Adpgk	-	-	Adpgk	Adpgk	TSS4282	chr9:59139378-59164007	-	-	11.6777	9.8226	13.5328	OK	7.24332	6.05584	8.4308	OK	31.0992	25.8119	36.3866	OK
Adprh	-	-	Adprh	Adprh	TSS16252	chr16:38445478-38452769	-	-	28.4159	23.966	32.8658	OK	18.5279	15.6038	21.4519	OK	24.8386	20.9551	28.722	OK
Adprhl1	-	-	Adprhl1	Adprhl1	TSS14174	chr8:13235661-13254162	-	-	0.0174779	0	0.043996	OK	0.0138268	0	0.0357586	OK	0	0	0	OK
Adprhl2	-	-	Adprhl2	Adprhl2	TSS14970	chr4:125993594-125998947	-	-	8.18	6.57582	9.78417	OK	5.70858	4.48169	6.93546	OK	11.9744	9.91277	14.036	OK
Adra1a	-	-	Adra1a	Adra1a	TSS14154	chr14:67254094-67352166	-	-	0.00768235	0	0.0182236	OK	0.0581934	0.0220362	0.0943506	OK	0	0	0	OK
Adra1b	-	-	Adra1b	Adra1b	TSS12798	chr11:43588107-43649834	-	-	0.00152682	0	0.00661566	OK	0.0214151	0.000751031	0.0420793	OK	0.00996486	0	0.0222395	OK
Adra1d	-	-	Adra1d	Adra1d	TSS21581	chr2:131371092-131388021	-	-	0	0	0	OK	0.0958435	0.0300589	0.161628	OK	0	0	0	OK
Adra2a	-	-	Adra2a	Adra2a	TSS20912	chr19:54119671-54123472	-	-	76.151	58.0492	94.2528	OK	43.955	35.178	52.732	OK	66.2526	51.0644	81.4408	OK
Adra2b	-	-	Adra2b	Adra2b	TSS19113	chr2:127189021-127192957	-	-	0	0	0	OK	0.0306915	0.00663741	0.0547456	OK	0.0918774	0.0410149	0.14274	OK
Adra2c	-	-	Adra2c	Adra2c	TSS21680	chr5:35621214-35624412	-	-	0.00510714	0	0.0145332	OK	0.0340266	0.00366822	0.064385	OK	0	0	0	OK
Adrb1	-	-	Adrb1	Adrb1	TSS16599	chr19:56796861-56799352	-	-	0.0134123	0	0.0314063	OK	0.207695	0.0991853	0.316204	OK	0	0	0	OK
Adrb2	-	-	Adrb2	Adrb2	TSS18034	chr18:62337469-62339613	-	-	4.82366	3.83601	5.81131	OK	0.93258	0.627154	1.23801	OK	0	0	0	OK
Adrb3	-	-	Adrb3	Adrb3	TSS4363	chr8:28336247-28340060	-	-	0.00127296	0	0.00612511	OK	0.00432359	0	0.0127229	OK	0	0	0	OK
Adrbk1	-	-	Adrbk1	Adrbk1	TSS18567	chr19:4286000-4305955	-	-	26.587	22.1684	31.0057	OK	20.5451	17.1795	23.9107	OK	35.2993	28.717	41.8816	OK
Adrbk2	-	-	Adrbk2	Adrbk2	TSS3855	chr5:113339497-113444534	-	-	23.9812	18.6504	29.3121	OK	24.1411	18.3217	29.9605	OK	18.2745	14.0076	22.5414	OK
Adrm1	-	-	Adrm1	Adrm1	TSS16302	chr2:179906292-179910988	-	-	8.35945	6.77334	9.94556	OK	4.71075	3.6726	5.7489	OK	11.3052	9.3874	13.2229	OK
Adsl	-	-	Adsl	Adsl	TSS2966	chr15:80778948-80799803	-	-	8.42057	6.98263	9.85852	OK	5.76192	4.7364	6.78744	OK	16.2453	13.7057	18.7849	OK
Adss	-	-	Adss	Adss	TSS8238	chr1:179693308-179726640	-	-	8.88655	7.42886	10.3442	OK	7.56938	6.35282	8.78595	OK	8.24639	6.92549	9.56729	OK
Adssl1	-	-	Adssl1	Adssl1	TSS5911	chr12:113858257-113879566	-	-	0.458451	0.24603	0.670871	OK	0.921378	0.594598	1.24816	OK	7.16152	5.8859	8.43714	OK
Aebp1	-	-	Aebp1	Aebp1	TSS17297	chr11:5761868-5778259	-	-	0.0287014	0	0.0830193	OK	1.13563	0.816411	1.45484	OK	0.0138355	0	0.0914467	OK
Aebp2	-	-	Aebp2	Aebp2	TSS12977,TSS18035,TSS954	chr6:140571183-140625939	-	-	11.2024	8.15159	14.2532	OK	9.54724	6.97296	12.1215	OK	9.59178	7.12245	12.0611	OK
Aen	-	-	Aen	Aen	TSS3232	chr7:86040812-86053719	-	-	3.70338	2.8314	4.57537	OK	2.65736	2.02297	3.29176	OK	9.89401	8.26122	11.5268	OK
Aes	-	-	Aes	Aes	TSS2084	chr10:81022304-81029109	-	-	255.784	190.083	321.485	OK	190.807	144.94	236.674	OK	383.483	251.83	515.136	OK
Afap1	-	-	Afap1	Afap1	TSS12672	chr5:36235967-36346571	-	-	0.22378	0.139739	0.307822	OK	0.965705	0.761454	1.16995	OK	9.89885	8.25498	11.5427	OK
Afap1l1	-	-	Afap1l1	Afap1l1	TSS16163	chr18:61889915-61946316	-	-	0.0577457	0.0167769	0.0987146	OK	1.10137	0.814473	1.38827	OK	0	0	0	OK
Afap1l2	-	-	Afap1l2	Afap1l2	TSS16046	chr19:56986843-57083065	-	-	0.0221968	0.00032678	0.0440668	OK	0.888231	0.647004	1.12946	OK	0.00724296	0	0.0187042	OK
Aff1	-	-	Aff1	Aff1	TSS20430,TSS22747	chr5:104183180-104284341	-	-	18.5276	14.8442	22.211	OK	15.1133	12.1205	18.106	OK	6.8931	5.69246	8.09375	OK
Aff2	-	-	Aff2	Aff2	TSS11178	chrX:66613505-67121212	-	-	8.27056	6.96631	9.57482	OK	7.51114	6.3343	8.68798	OK	11.0762	9.2813	12.8711	OK
Aff3	-	-	Aff3	Aff3	TSS10367	chr1:38234171-38721800	-	-	0.172907	0.10066	0.245154	OK	0.156553	0.0936074	0.219498	OK	0.264557	0.175183	0.353932	OK
Aff4	-	-	Aff4	Aff4	TSS8883	chr11:53164268-53235332	-	-	25.5448	19.6209	31.4687	OK	23.8829	17.8035	29.9622	OK	12.1054	9.73284	14.478	OK
Afg3l1	-	-	Afg3l1	Afg3l1	TSS12916	chr8:126001761-126027816	-	-	8.35069	6.99144	9.70994	OK	7.64612	6.48169	8.81056	OK	26.2546	21.456	31.0532	OK
Afg3l2	-	-	Afg3l2	Afg3l2	TSS19920	chr18:67564417-67608790	-	-	12.6629	10.6817	14.6441	OK	12.7378	10.7438	14.7318	OK	21.5492	18.0367	25.0616	OK
Afm	-	-	Afm	Afm	TSS12363	chr5:90947974-90982570	-	-	0.514394	0.295671	0.733118	OK	0.620398	0.392344	0.848452	OK	0	0	0	OK
Afmid	-	-	Afmid	Afmid	TSS23407	chr11:117676832-117701222	-	-	1.03156	0.685135	1.37799	OK	0.884745	0.590769	1.17872	OK	5.58635	4.11148	7.06122	OK
Afp	-	-	Afp	Afp	TSS9292	chr5:90919739-90937933	-	-	0.0136607	0	0.0345287	OK	0.00748049	0	0.0193459	OK	0	0	0	OK
Aftph	-	-	Aftph	Aftph	TSS19835	chr11:20585087-20641487	-	-	17.3146	14.5308	20.0984	OK	14.6035	12.2186	16.9885	OK	9.08493	7.66073	10.5091	OK
Aga	-	-	Aga	Aga	TSS12905	chr8:54597079-54608776	-	-	37.678	31.7834	43.5725	OK	26.0894	22.0069	30.1719	OK	37.4808	31.5893	43.3723	OK
Agap1	-	-	Agap1	Agap1	TSS4585	chr1:91351385-91791857	-	-	8.51764	7.05962	9.97566	OK	9.53499	7.81527	11.2547	OK	32.1528	23.2143	41.0914	OK
Agap2	-	-	Agap2	Agap2	TSS23521	chr10:126515962-126530225	-	-	0.580207	0.411334	0.74908	OK	1.25895	0.989022	1.52888	OK	1.93488	1.57027	2.29948	OK
Agap3	-	-	Agap3	Agap3	TSS12022	chr5:23957994-24007865	-	-	15.4004	12.9821	17.8188	OK	13.4802	11.3662	15.5942	OK	43.5958	35.1974	51.9941	OK
Agbl1	-	-	Agbl1	Agbl1	TSS14072	chr7:83374772-84269584	-	-	0.00131424	0	0.00562921	OK	0.00155607	0	0.00583113	OK	0	0	0	OK
Agbl2	-	-	Agbl2	Agbl2	TSS21227	chr2:90622900-90656388	-	-	0.137379	0.0637254	0.211032	OK	0.180575	0.0991079	0.262043	OK	0.0687668	0.0271472	0.110386	OK
Agbl3	-	-	Agbl3	Agbl3	TSS8599	chr6:34730431-34807932	-	-	1.62633	1.24283	2.00984	OK	1.32776	1.02404	1.63149	OK	0.573094	0.394518	0.751671	OK
Agbl4	-	-	Agbl4	Agbl4	TSS12631	chr4:110070395-111330115	-	-	1.898	1.46532	2.33068	OK	2.02413	1.44948	2.59877	OK	0.301563	0.142294	0.460832	OK
Agbl5	-	-	Agbl5	Agbl5	TSS404,TSS8201	chr5:31191224-31210161	-	-	9.79225	7.47003	12.1145	OK	9.20867	7.24119	11.1762	OK	4.28333	2.9125	5.65417	OK
Ager	-	-	Ager	Ager	TSS9342	chr17:34734806-34737877	-	-	0.282771	0.118636	0.446907	OK	0.426932	0.217855	0.63601	OK	0.0701048	0.0101344	0.130075	OK
Agfg1	-	-	Agfg1	Agfg1	TSS22958	chr1:82836057-82892850	-	-	24.6442	20.6315	28.6568	OK	20.5038	17.1269	23.8808	OK	34.591	28.2205	40.9615	OK
Agfg2	-	-	Agfg2	Agfg2	TSS17339,TSS3654	chr5:138092081-138125921	-	-	3.24929	2.45208	4.0465	OK	3.52286	2.69319	4.35253	OK	7.91007	6.47292	9.34722	OK
Aggf1	-	-	Aggf1	Aggf1	TSS216	chr13:96120671-96145289	-	-	11.8723	10.0081	13.7365	OK	9.73912	8.21508	11.2632	OK	13.1296	11.0715	15.1878	OK
Agk	-	-	Agk	Agk	TSS17160	chr6:40275476-40346761	-	-	1.12984	0.76533	1.49436	OK	0.985139	0.675621	1.29466	OK	1.93188	1.45695	2.40681	OK
Agl	-	-	Agl	Agl	TSS2531	chr3:116442916-116511084	-	-	6.55736	5.50971	7.605	OK	7.12994	5.93167	8.32822	OK	4.60745	3.8766	5.3383	OK
Agmat	-	-	Agmat	Agmat	TSS16328	chr4:141302589-141315178	-	-	0.00356031	0	0.0152497	OK	0	0	0	OK	0	0	0	OK
Agpat1	-	-	Agpat1	Agpat1	TSS10978,TSS23135	chr17:34742805-34752916	-	-	41.2387	33.4892	48.9882	OK	27.5618	23.1068	32.0167	OK	74.2132	58.315	90.1114	OK
Agpat2	-	-	Agpat2	Agpat2	TSS19989	chr2:26449106-26459730	-	-	7.66282	5.78886	9.53677	OK	6.77368	5.12608	8.42128	OK	0.180476	0.0396116	0.321341	OK
Agpat3	-	-	Agpat3	Agpat3	TSS13611	chr10:77734307-77814445	-	-	30.4345	25.1741	35.695	OK	25.2873	20.9439	29.6307	OK	37.0617	29.9598	44.1636	OK
Agpat4	-	-	Agpat4	Agpat4	TSS2910	chr17:12312149-12412506	-	-	0.354897	0.181512	0.528282	OK	1.08475	0.726833	1.44267	OK	12.8867	10.838	14.9353	OK
Agpat5	-	-	Agpat5	Agpat5	TSS18740	chr8:18846278-18884413	-	-	4.67143	3.87408	5.46878	OK	3.38932	2.80476	3.97387	OK	5.3445	4.4878	6.20121	OK
Agpat6	-	-	Agpat6	Agpat6	TSS10157	chr8:24283417-24318925	-	-	13.3515	11.2461	15.4568	OK	9.7051	8.18606	11.2241	OK	12.2389	10.2963	14.1815	OK
Agpat9	-	-	Agpat9	Agpat9	TSS17637	chr5:101275247-101328121	-	-	0.211774	0.105	0.318549	OK	0.175736	0.0893938	0.262079	OK	0	0	0	OK
Agphd1	-	-	Agphd1	Agphd1	TSS21331	chr9:54765096-54797731	-	-	0.750166	0.542405	0.957927	OK	0.959472	0.7417	1.17725	OK	0.113301	0.0612629	0.165339	OK
Agps	-	-	Agps	Agps	TSS4540	chr2:75670233-75769407	-	-	5.50546	4.64452	6.36639	OK	4.91616	4.14499	5.68733	OK	3.53164	2.97775	4.08552	OK
Agr2	-	-	Agr2	Agr2	TSS2929	chr12:36719511-36730668	-	-	0.0357037	0	0.0933309	OK	0.0396936	0	0.0896471	OK	0	0	0	OK
Agr3	-	-	Agr3	Agr3	TSS2518	chr12:36652207-36676317	-	-	0	0	0	OK	0	0	0	OK	0	0	0	OK
Agrn	-	-	Agrn	Agrn	TSS9670	chr4:155539398-155559244	-	-	1.02169	0.794825	1.24856	OK	4.24562	3.57818	4.91306	OK	1.96467	1.62592	2.30342	OK
Agrp	-	-	Agrp	Agrp	TSS4190	chr8:108090597-108092198	-	-	0.0484803	0	0.118985	OK	0.101614	0	0.206367	OK	0.361406	0.113132	0.609679	OK
Agt	-	-	Agt	Agt	TSS8628	chr8:127080486-127093607	-	-	7.37154	6.03012	8.71295	OK	7.10091	5.84811	8.35371	OK	10.5395	8.83408	12.245	OK
Agtpbp1	-	-	Agtpbp1	Agtpbp1	TSS715	chr13:59550895-59658680	-	-	10.2422	8.61419	11.8702	OK	8.97192	7.50132	10.4425	OK	8.37772	7.00083	9.75461	OK
Agtr1a	-	-	Agtr1a	Agtr1a	TSS23046	chr13:30428224-30474736	-	-	0.00622701	0	0.0188901	OK	0.865712	0.589376	1.14205	OK	0	0	0	OK
Agtr1b	-	-	Agtr1b	Agtr1b	TSS18937	chr3:20213394-20266099	-	-	0	0	0	OK	0.0195776	0	0.0405673	OK	0	0	0	OK
Agtr2	-	-	Agtr2	Agtr2	TSS18424	chrX:21061751-21065957	-	-	0.00176495	0	0.00755972	OK	0.00174617	0	0.00654348	OK	0	0	0	OK
Agtrap	-	-	Agtrap	Agtrap	TSS10743	chr4:147451169-147462173	-	-	5.87687	4.92689	6.82685	OK	5.70086	4.79529	6.60644	OK	3.1745	2.62495	3.72404	OK
Agxt	-	-	Agxt	Agxt	TSS14424	chr1:95031852-95041998	-	-	0	0	0	OK	0.00406792	0	0.0152439	OK	0	0	0	OK
Agxt2	-	-	Agxt2	Agxt2	TSS23564	chr15:10288333-10339493	-	-	1.065	0.689592	1.4404	OK	1.15465	0.783858	1.52544	OK	0	0	0	OK
Agxt2l1	-	-	Agxt2l1	Agxt2l1	TSS21734,TSS23864	chr3:130320365-130338668	-	-	0.00487848	0	0.0215851	OK	0	0	0	OK	0	0	0	OK
Agxt2l2	-	-	Agxt2l2	Agxt2l2	TSS18566	chr11:51398258-51420383	-	-	4.48843	1.62553	7.35134	OK	3.35404	1.16686	5.54122	OK	6.55591	0	13.7461	OK
Ahctf1	-	-	Ahctf1	Ahctf1	TSS21962	chr1:181675034-181734146	-	-	5.26078	4.43631	6.08524	OK	5.73423	4.81188	6.65658	OK	3.75075	3.16411	4.33739	OK
Ahcy	-	-	Ahcy	Ahcy	TSS16253	chr2:154885047-154900233	-	-	4.31945	3.48678	5.15211	OK	4.39674	3.59704	5.19644	OK	9.03287	7.60269	10.463	OK
Ahcyl1	-	-	Ahcyl1	Ahcyl1	TSS14757	chr3:107466037-107499466	-	-	53.9086	42.6526	65.1646	OK	45.5384	35.7001	55.3767	OK	66.3932	49.6319	83.1544	OK
Ahcyl2	-	-	Ahcyl2	Ahcyl2	TSS1141,TSS11684	chr6:29718442-29862310	-	-	20.4844	16.8752	24.0935	OK	18.4918	15.1908	21.7928	OK	10.5096	8.78072	12.2385	OK
Ahdc1	-	-	Ahdc1	Ahdc1	TSS6933	chr4:132567420-132634025	-	-	7.54699	6.35724	8.73674	OK	9.08398	7.61634	10.5516	OK	1.84762	1.52037	2.17488	OK
Ahi1	-	-	Ahi1	Ahi1	TSS14810,TSS20564	chr10:20672352-20800235	-	-	10.1527	8.35134	11.9541	OK	9.11389	7.61105	10.6167	OK	7.22769	5.94807	8.50731	OK
Ahnak	-	-	Ahnak	Ahnak	TSS888	chr19:9063773-9151409	-	-	1.38594	0.897335	1.87454	OK	3.89903	2.45285	5.34521	OK	0.0378386	0	0.0940038	OK
Ahr	-	-	Ahr	Ahr	TSS8026	chr12:36182650-36219661	-	-	0.87709	0.653169	1.10101	OK	2.08875	1.72217	2.45533	OK	0.0497391	0.0206051	0.0788731	OK
Ahrr	-	-	Ahrr	Ahrr	TSS7537	chr13:74348565-74429757	-	-	0.000963941	0	0.00417671	OK	0.020682	0.00394933	0.0374147	OK	0	0	0	OK
Ahsa1	-	-	Ahsa1	Ahsa1	TSS13795	chr12:88607677-88614902	-	-	32.1749	27.129	37.2208	OK	17.7128	14.8885	20.5371	OK	39.132	32.9105	45.3534	OK
Ahsa2	-	-	Ahsa2	Ahsa2	TSS23098	chr11:23206894-23397946	-	-	3.2925	0.919134	5.66587	OK	2.04794	0	4.42952	OK	5.27567	2.98313	7.56821	OK
Ahsg	-	-	Ahsg	Ahsg	TSS17351	chr16:22892114-22899511	-	-	0	0	0	OK	0.00398945	0	0.0149498	OK	0	0	0	OK
Aicda	-	-	Aicda	Aicda	TSS21146	chr6:122503826-122514198	-	-	0.138415	0.0544162	0.222414	OK	0.102806	0.0398091	0.165804	OK	0.0121881	0	0.0272013	OK
Aida	-	-	Aida	Aida	TSS8575	chr1_random:270407-297849	-	-	0	0	0	OK	0	0	0	OK	0	0	0	OK
Aif1	-	-	Aif1	Aif1	TSS17678	chr17:35307936-35312946	-	-	0.0845588	0	0.176195	OK	0.713976	0.369804	1.05815	OK	0	0	0	OK
Aif1l	-	-	Aif1l	Aif1l	TSS6874	chr2:31805822-31828962	-	-	0.00593593	0	0.0165967	OK	0.0892271	0.0352706	0.143184	OK	0	0	0	OK
Aifm1	-	-	Aifm1	Aifm1	TSS1174	chrX:45828120-45866603	-	-	4.99569	4.00894	5.98244	OK	4.15073	3.34137	4.9601	OK	13.8401	11.6687	16.0115	OK
Aifm2	-	-	Aifm2	Aifm2	TSS22477,TSS2614	chr10:61178010-61246612	-	-	2.20004	1.43496	2.96513	OK	2.17092	1.55754	2.78431	OK	2.23139	1.21701	3.24577	OK
Aifm3	-	-	Aifm3	Aifm3	TSS16610	chr16:17489783-17507575	-	-	0.718803	0.465716	0.971889	OK	0.857532	0.583103	1.13196	OK	0.0707145	0.022136	0.119293	OK
Aig1	-	-	Aig1	Aig1	TSS14510	chr10:13372514-13588636	-	-	25.6124	21.4778	29.747	OK	15.9422	13.2487	18.6357	OK	40.2652	33.9602	46.5702	OK
Aim1	-	-	Aim1	Aim1	TSS18952	chr10:43670112-43724652	-	-	1.20866	0.963336	1.45399	OK	1.86768	1.55143	2.18392	OK	0.0110639	0.00159939	0.0205284	OK
Aim1l	-	-	Aim1l	Aim1l	TSS10164	chr4:133624366-133648419	-	-	0.0638529	0.0245824	0.103124	OK	0.0533317	0.0204267	0.0862368	OK	0.006173	0	0.0137768	OK
Aim2	-	-	Aim2	Aim2	TSS17568	chr1:175350734-175396167	-	-	0.0159673	0	0.0357455	OK	0.124004	0.0550803	0.192928	OK	0	0	0	OK
Aimp1	-	-	Aimp1	Aimp1	TSS12336	chr3:132323461-132346843	-	-	14.4214	11.86	16.9828	OK	11.2006	9.20855	13.1927	OK	36.838	31.0762	42.5999	OK
Aimp2	-	-	Aimp2	Aimp2	TSS22603	chr5:144578660-144670708	-	-	8.46957	5.51384	11.4253	OK	4.87277	2.94231	6.80322	OK	25.7853	19.0092	32.5614	OK
Aip	-	-	Aip	Aip	TSS20548	chr19:4114445-4125827	-	-	21.1593	17.7782	24.5404	OK	14.1499	11.8109	16.4888	OK	42.9077	36.0489	49.7666	OK
Aipl1	-	-	Aipl1	Aipl1	TSS9640	chr11:71842223-71851011	-	-	0.0867772	0.0129463	0.160608	OK	0.0872661	0.0188724	0.15566	OK	0.504403	0.275886	0.73292	OK
Aire	-	-	Aire	Aire	TSS16668	chr10:77492775-77526360	-	-	0.00698228	0	0.0248997	OK	0.00933727	0	0.0296821	OK	0	0	0	OK
Airn	-	-	Airn	Airn	TSS1053	chr17:12875271-13061009	-	-	4.79858	0	11.5472	OK	7.79298	0	18.3348	OK	8.36329	0	35.7164	OK
Ajap1	-	-	Ajap1	Ajap1	TSS22801	chr4:152747329-152856939	-	-	0	0	0	OK	0.0156487	0	0.0324262	OK	0.0212618	0.000519065	0.0420045	OK
Ak1	-	-	Ak1	Ak1	TSS11371,TSS14425,TSS21699,TSS3218	chr2:32477277-32490578	-	-	9.52392	7.91731	11.1305	OK	7.54513	6.24291	8.84735	OK	19.0746	15.9329	22.2163	OK
Ak2	-	-	Ak2	Ak2	TSS21495,TSS9767	chr4:128670508-128688773	-	-	12.7383	10.2073	15.2693	OK	10.304	8.22641	12.3815	OK	32.1593	26.3014	38.0173	OK
Ak3	-	-	Ak3	Ak3	TSS10146	chr19:29095321-29123219	-	-	19.2874	16.1533	22.4216	OK	16.2517	13.6007	18.9027	OK	0.50545	0.327725	0.683176	OK
Ak4	-	-	Ak4	Ak4	TSS1906,TSS4370,TSS4676,TSS6688	chr4:101091893-101140376	-	-	0.0292948	0.00525627	0.0533333	OK	0.108912	0.0446424	0.173181	OK	0.0170458	0.00092868	0.0331629	OK
Ak5	-	-	Ak5	Ak5	TSS11644	chr3:152058973-152331104	-	-	2.39227	1.14268	3.64186	OK	1.45672	0.490449	2.42299	OK	7.86928	5.66437	10.0742	OK
Ak7	-	-	Ak7	Ak7	TSS20147	chr12:106944191-107020657	-	-	0.111281	0.0453335	0.177229	OK	0.0985261	0.0426411	0.154411	OK	0	0	0	OK
Ak8	-	-	Ak8	Ak8	TSS8156	chr2:28555680-28668685	-	-	0.112018	0.0293472	0.19469	OK	0.235156	0.1039	0.366411	OK	0.0927764	0.0243633	0.16119	OK
Akap1	-	-	Akap1	Akap1	TSS15135,TSS9135	chr11:88692105-88725900	-	-	4.06923	3.35797	4.78049	OK	3.90997	3.2478	4.57215	OK	8.02073	6.76132	9.28014	OK
Akap10	-	-	Akap10	Akap10	TSS9227	chr11:61684808-61743728	-	-	6.52498	5.47687	7.5731	OK	5.35087	4.49773	6.204	OK	2.18465	1.76876	2.60055	OK
Akap11	-	-	Akap11	Akap11	TSS2299	chr14:78892052-78936667	-	-	16.4946	13.3308	19.6585	OK	15.8774	12.5526	19.2022	OK	10.9044	8.87859	12.9301	OK
Akap12	-	-	Akap12	Akap12	TSS5185	chr10:5987069-6080212	-	-	0.152855	0.0868445	0.218866	OK	1.44845	1.1778	1.71909	OK	0.0872331	0.0459746	0.128492	OK
Akap13	-	-	Akap13	Akap13	TSS16801	chr7:82600419-82899495	-	-	19.399	14.9027	23.8954	OK	17.1753	13.0898	21.2609	OK	10.09	8.09181	12.0882	OK
Akap14	-	-	Akap14	Akap14	TSS18315	chrX:34666757-34708837	-	-	0.0738895	0	0.218957	OK	0.0466857	0	0.151744	OK	0.0169618	0	0.073413	OK
Akap17b	-	-	Akap17b	Akap17b	TSS4066	chrX:34148177-34185409	-	-	2.37892	1.95837	2.79947	OK	2.01959	1.6755	2.36368	OK	0.00857532	0.00020935	0.0169413	OK
Akap2	-	-	Akap2	Akap2	TSS19029,TSS6543	chr4:57858119-57909856	-	-	0.14502	0.0690076	0.221032	OK	1.4789	1.20706	1.75073	OK	0.0120657	0.000690272	0.0234411	OK
Akap3	-	-	Akap3	Akap3	TSS824	chr6:126803115-126824326	-	-	0.0543656	0.0135585	0.0951726	OK	0.0315529	0.00602517	0.0570806	OK	0.0946636	0.0408294	0.148498	OK
Akap4	-	-	Akap4	Akap4	TSS18587,TSS6055	chrX:6644644-6655732	-	-	0.00249488	0	0.0153041	OK	0	0	0	OK	0	0	0	OK
Akap5	-	-	Akap5	Akap5	TSS13957	chr12:77425877-77435138	-	-	0.176543	0.104993	0.248092	OK	0.235055	0.155922	0.314189	OK	0.120711	0.07033	0.171092	OK
Akap6	-	-	Akap6	Akap6	TSS16401	chr12:53800369-54252002	-	-	1.22537	1.00022	1.45052	OK	1.1723	0.970952	1.37364	OK	1.61034	1.34908	1.87159	OK
Akap7	-	-	Akap7	Akap7	TSS3422	chr10:24888895-25018969	-	-	3.0291	2.41631	3.6419	OK	3.12054	2.55327	3.68781	OK	0.858703	0.614933	1.10247	OK
Akap8	-	-	Akap8	Akap8	TSS14557	chr17:32440620-32458098	-	-	11.3711	9.59275	13.1495	OK	11.5251	9.70704	13.3432	OK	13.074	10.9939	15.154	OK
Akap8l	-	-	Akap8l	Akap8l	TSS1955	chr17:32458368-32487522	-	-	24.8423	20.9122	28.7725	OK	20.9797	17.6814	24.2779	OK	14.6679	12.3674	16.9685	OK
Akap9	-	-	Akap9	Akap9	TSS22910	chr5:3928185-4080204	-	-	13.2651	10.6536	15.8767	OK	13.0661	10.2331	15.8991	OK	4.73283	3.95775	5.50791	OK
Akirin1	-	-	Akirin1	Akirin1	TSS16674	chr4:123412437-123427542	-	-	20.445	17.2411	23.6488	OK	16.3816	13.8146	18.9486	OK	17.1472	14.4592	19.8353	OK
Akirin2	-	-	Akirin2	Akirin2	TSS10998	chr4:34497863-34562191	-	-	14.9961	10.7675	19.2248	OK	12.6581	8.83194	16.4843	OK	9.19561	6.10373	12.2875	OK
Akna	-	-	Akna	Akna	TSS18969	chr4:63028161-63064479	-	-	0.264105	0.16533	0.362879	OK	0.79083	0.598558	0.983102	OK	1.38856	1.11656	1.66057	OK
Aknad1	-	-	Aknad1	Aknad1	TSS23504	chr3:108542575-108585227	-	-	0	0	0	OK	0.0018187	0	0.00681529	OK	0	0	0	OK
Akp3	-	-	Akp3	Akp3	TSS4743	chr1:89021582-89024487	-	-	1.24809	0.764951	1.73123	OK	0	0	0	OK	0	0	0	OK
Akr1a4	-	-	Akr1a4	Akr1a4	TSS6812	chr4:116309114-116324256	-	-	173.653	136.393	210.913	OK	109.814	88.6676	130.96	OK	320.872	224.649	417.094	OK
Akr1b10	-	-	Akr1b10	Akr1b10	TSS883	chr6:34334246-34346949	-	-	5.12542	3.95645	6.29438	OK	3.27844	2.46814	4.08874	OK	5.21344	4.12631	6.30057	OK
Akr1b3	-	-	Akr1b3	Akr1b3	TSS20985	chr6:34253929-34267489	-	-	3.82102	2.63714	5.0049	OK	2.57757	1.78043	3.3747	OK	7.37156	5.75623	8.98689	OK
Akr1b7	-	-	Akr1b7	Akr1b7	TSS21930	chr6:34362361-34373137	-	-	0.0474872	0	0.0989622	OK	0.0271369	0	0.0592058	OK	0.094614	0.0207662	0.168462	OK
Akr1b8	-	-	Akr1b8	Akr1b8	TSS10597	chr6:34304163-34318454	-	-	0.388521	0.179478	0.597564	OK	0.320875	0.151232	0.490518	OK	0.675959	0.393834	0.958084	OK
Akr1c12	-	-	Akr1c12	Akr1c12	TSS19243	chr13:4267417-4278645	-	-	24.0141	20.1876	27.8406	OK	20.5484	17.3061	23.7907	OK	45.435	38.1387	52.7313	OK
Akr1c13	-	-	Akr1c13	Akr1c13	TSS9356	chr13:4190432-4204849	-	-	15.6553	12.9995	18.311	OK	10.7779	8.90201	12.6537	OK	31.113	26.2445	35.9816	OK
Akr1c14	-	-	Akr1c14	Akr1c14	TSS2005	chr13:4058836-4089668	-	-	7.29264	6.03781	8.54746	OK	7.48093	6.27677	8.68509	OK	4.54824	3.74116	5.35533	OK
Akr1c18	-	-	Akr1c18	Akr1c18	TSS14442	chr13:4131872-4149877	-	-	0	0	0	OK	0.00478852	0	0.0179442	OK	0.527527	0.278023	0.777031	OK
Akr1c19	-	-	Akr1c19	Akr1c19	TSS7707	chr13:4232985-4247605	-	-	12.9688	10.6723	15.2654	OK	12.5449	10.4436	14.6462	OK	17.4318	14.6359	20.2278	OK
Akr1c20	-	-	Akr1c20	Akr1c20	TSS10793	chr13:4506404-4522579	-	-	0	0	0	OK	0	0	0	OK	0	0	0	OK
Akr1c21	-	-	Akr1c21	Akr1c21	TSS7424	chr13:4573320-4585789	-	-	0.0262763	0	0.0611931	OK	0.0137284	0	0.0355041	OK	0	0	0	OK
Akr1c6	-	-	Akr1c6	Akr1c6	TSS15004	chr13:4433588-4456776	-	-	0	0	0	OK	0	0	0	OK	0	0	0	OK
Akr1d1	-	-	Akr1d1	Akr1d1	TSS17603	chr6:37480172-37518815	-	-	1.29041	0.917433	1.66339	OK	0.802312	0.558648	1.04598	OK	0	0	0	OK
Akr1e1	-	-	Akr1e1	Akr1e1	TSS13303	chr13:4591735-4608410	-	-	8.62836	7.08991	10.1668	OK	6.34163	5.21131	7.47195	OK	5.64669	4.605	6.68838	OK
Akr7a5	-	-	Akr7a5	Akr7a5	TSS10074	chr4:138866658-138874701	-	-	8.41065	6.877	9.94429	OK	6.24504	5.03618	7.4539	OK	9.57588	7.93422	11.2175	OK
Akt1	-	-	Akt1	Akt1	TSS20366	chr12:113892031-113912487	-	-	81.924	64.3484	99.4997	OK	58.085	46.6276	69.5425	OK	69.7065	54.9034	84.5096	OK
Akt1s1	-	-	Akt1s1	Akt1s1	TSS20130	chr7:52104596-52110780	-	-	20.5293	17.2829	23.7758	OK	15.4811	12.9862	17.976	OK	43.907	36.7741	51.0399	OK
Akt2	-	-	Akt2	Akt2	TSS16794,TSS5854	chr7:28376578-28424472	-	-	12.9252	10.7828	15.0677	OK	10.4231	8.71038	12.1358	OK	37.7405	30.4428	45.0382	OK
Akt3	-	-	Akt3	Akt3	TSS32	chr1:178952245-179178898	-	-	19.6528	16.3331	22.9725	OK	16.0829	13.3125	18.8534	OK	7.76278	6.5424	8.98315	OK
Aktip	-	-	Aktip	Aktip	TSS16692	chr8:93593992-93659395	-	-	17.5581	13.3802	21.7361	OK	11.3063	7.94335	14.6693	OK	8.79359	6.62823	10.959	OK
Alad	-	-	Alad	Alad	TSS8202	chr4:62170203-62181097	-	-	6.28073	4.93064	7.63083	OK	6.23281	4.93397	7.53164	OK	37.451	31.5533	43.3487	OK
Alas1	-	-	Alas1	Alas1	TSS5091	chr9:106135785-106150285	-	-	7.81993	6.53378	9.10609	OK	6.35238	5.30498	7.39978	OK	20.1423	16.9087	23.376	OK
Alas2	-	-	Alas2	Alas2	TSS2943	chrX:146981959-147005165	-	-	0.0510808	0.00327215	0.0988895	OK	0.335905	0.155924	0.515886	OK	0.0882025	0.026534	0.149871	OK
Alb	-	-	Alb	Alb	TSS8725	chr5:90889914-90905629	-	-	0.0369261	0	0.0745571	OK	0.280981	0.148705	0.413257	OK	0	0	0	OK
Alcam	-	-	Alcam	Alcam	TSS22781	chr16:52249108-52453110	-	-	6.4687	5.43918	7.49822	OK	9.95789	8.35508	11.5607	OK	4.68612	3.94677	5.42548	OK
Aldh16a1	-	-	Aldh16a1	Aldh16a1	TSS11327	chr7:52397209-52415434	-	-	2.81314	2.12844	3.49784	OK	2.58967	1.96021	3.21913	OK	11.1723	8.83171	13.5128	OK
Aldh18a1	-	-	Aldh18a1	Aldh18a1	TSS1341	chr19:40624746-40662953	-	-	45.7222	36.4544	54.99	OK	30.5488	24.9308	36.1667	OK	59.552	45.7257	73.3783	OK
Aldh1a1	-	-	Aldh1a1	Aldh1a1	TSS9110	chr19:20676471-20717952	-	-	0.108487	0.0329523	0.184021	OK	1.01254	0.689799	1.33529	OK	0	0	0	OK
Aldh1a2	-	-	Aldh1a2	Aldh1a2	TSS24018	chr9:71063595-71144050	-	-	0.0211616	0	0.0462716	OK	0.30632	0.168122	0.444518	OK	0	0	0	OK
Aldh1a3	-	-	Aldh1a3	Aldh1a3	TSS8756	chr7:73535778-73572363	-	-	0.153137	0.0691702	0.237105	OK	0.170257	0.0901061	0.250408	OK	0	0	0	OK
Aldh1a7	-	-	Aldh1a7	Aldh1a7	TSS8070	chr19:20767442-20802046	-	-	0.0298158	0	0.0616956	OK	0.486093	0.291425	0.68076	OK	0	0	0	OK
Aldh1b1	-	-	Aldh1b1	Aldh1b1	TSS7362	chr4:45811893-45817480	-	-	1.31706	0.917708	1.71642	OK	1.2177	0.858166	1.57723	OK	0.993589	0.68131	1.30587	OK
Aldh1l1	-	-	Aldh1l1	Aldh1l1	TSS15777	chr6:90500841-90549165	-	-	0.0612654	0.017176	0.105355	OK	0.932202	0.660846	1.20356	OK	0	0	0	OK
Aldh1l2	-	-	Aldh1l2	Aldh1l2	TSS3830	chr10:82950191-82996885	-	-	10.9296	9.16896	12.6901	OK	8.6506	7.25787	10.0433	OK	40.4919	30.1704	50.8134	OK
Aldh2	-	-	Aldh2	Aldh2	TSS4804	chr5:122017695-122043833	-	-	5.57247	4.52072	6.62421	OK	12.3027	10.3502	14.2551	OK	0.758883	0.483461	1.0343	OK
Aldh3a1	-	-	Aldh3a1	Aldh3a1	TSS21831	chr11:61022243-61031918	-	-	0.00698754	0	0.0299377	OK	0.0072367	0	0.0302971	OK	0	0	0	OK
Aldh3a2	-	-	Aldh3a2	Aldh3a2	TSS6054	chr11:61058256-61080629	-	-	25.322	21.1742	29.4699	OK	20.401	17.049	23.753	OK	13.3347	11.236	15.4334	OK
Aldh3b1	-	-	Aldh3b1	Aldh3b1	TSS21355	chr19:3913490-3929716	-	-	1.02276	0.658894	1.38663	OK	1.32053	0.905634	1.73542	OK	0.596951	0.359426	0.834476	OK
Aldh3b2	-	-	Aldh3b2	Aldh3b2	TSS3848	chr19:3972327-3981665	-	-	7.18106e-06	0	0.000415991	OK	0.00540629	0	0.0159089	OK	0.0135149	0	0.0301625	OK
Aldh4a1	-	-	Aldh4a1	Aldh4a1	TSS1178	chr4:139178808-139205606	-	-	6.77989	5.67281	7.88697	OK	5.86639	4.91165	6.82113	OK	7.11163	5.98264	8.24062	OK
Aldh5a1	-	-	Aldh5a1	Aldh5a1	TSS21085	chr13:24999447-25029530	-	-	8.15885	6.87672	9.44098	OK	7.41204	6.24483	8.57926	OK	1.30698	1.0437	1.57026	OK
Aldh6a1	-	-	Aldh6a1	Aldh6a1	TSS21724	chr12:85750017-85791900	-	-	8.80411	7.22083	10.3874	OK	10.3949	8.62453	12.1653	OK	2.50659	1.93841	3.07476	OK
Aldh7a1	-	-	Aldh7a1	Aldh7a1	TSS16211,TSS16482	chr18:56685389-56747366	-	-	8.65265	6.97053	10.3348	OK	8.74933	7.0788	10.4199	OK	9.39002	7.5452	11.2348	OK
Aldh8a1	-	-	Aldh8a1	Aldh8a1	TSS22166	chr10:21097105-21116384	-	-	0.00745003	0	0.0206676	OK	0.00238115	0	0.00892297	OK	0.036089	0.00521702	0.0669609	OK
Aldh9a1	-	-	Aldh9a1	Aldh9a1	TSS4849	chr1:169280121-169298661	-	-	57.0432	45.9841	68.1023	OK	33.9354	27.9733	39.8975	OK	30.5254	25.2919	35.7589	OK
Aldoa	-	-	Aldoa	Aldoa	TSS11688,TSS14826,TSS20834	chr7:133938747-133943961	-	-	158.613	122.376	194.849	OK	107.987	84.8245	131.149	OK	369.02	234.164	503.875	OK
Aldoart1	-	-	Aldoart1	Aldoart1	TSS21418	chr4:72511616-72513668	-	-	15.6816	13.2119	18.1514	OK	8.90546	7.46172	10.3492	OK	32.2573	26.9037	37.6108	OK
Aldoart2	-	-	Aldoart2	Aldoart2	TSS18204	chr12:56666121-56667696	-	-	3.61524	2.74207	4.48841	OK	1.70509	1.19411	2.21607	OK	7.23102	5.92801	8.53404	OK
Aldob	-	-	Aldob	Aldob	TSS13177	chr4:49548866-49562355	-	-	2.62898	1.95858	3.29937	OK	0.82663	0.544257	1.109	OK	0.0419251	0.0060607	0.0777896	OK
Aldoc	-	-	Aldoc	Aldoc	TSS6777	chr11:78137699-78140262	-	-	2.62406	1.92422	3.3239	OK	2.83353	2.14059	3.52647	OK	10.0993	8.41832	11.7803	OK
Alg1	-	-	Alg1	Alg1	TSS13237	chr16:5233713-5256049	-	-	19.5067	15.417	23.5965	OK	13.0688	10.3003	15.8374	OK	36.1126	29.1123	43.1129	OK
Alg10b	-	-	Alg10b	Alg10b	TSS18061	chr15:90054741-90060985	-	-	13.9305	11.7412	16.1199	OK	13.437	11.2964	15.5776	OK	8.60293	7.25804	9.94783	OK
Alg11	-	-	Alg11	Alg11	TSS19234	chr8:23171191-23178761	-	-	8.01736	6.47507	9.55965	OK	5.61955	4.5043	6.73479	OK	1.92054	1.36134	2.47973	OK
Alg12	-	-	Alg12	Alg12	TSS9316	chr15:88635672-88649748	-	-	11.4781	9.46583	13.4903	OK	7.19208	5.92147	8.46268	OK	11.6542	9.77767	13.5308	OK
Alg13	-	-	Alg13	Alg13	TSS5638	chrX:140752508-140808991	-	-	1.23021	0.749774	1.71064	OK	1.28512	0.861351	1.70888	OK	3.29246	2.50249	4.08242	OK
Alg14	-	-	Alg14	Alg14	TSS7267	chr3:120994734-121064929	-	-	9.82039	7.71849	11.9223	OK	5.93291	4.5159	7.34992	OK	10.7292	8.62285	12.8356	OK
Alg2	-	-	Alg2	Alg2	TSS18128	chr4:47482704-47487239	-	-	65.94	52.3357	79.5443	OK	48.3068	38.6091	58.0046	OK	58.636	45.9722	71.2998	OK
Alg3	-	-	Alg3	Alg3	TSS7337	chr16:20605530-20610822	-	-	14.5102	12.0858	16.9347	OK	9.3449	7.68147	11.0083	OK	31.3985	26.4592	36.3378	OK
Alg5	-	-	Alg5	Alg5	TSS8573	chr3:54539460-54553717	-	-	12.534	10.3811	14.6869	OK	8.40581	6.90829	9.90332	OK	24.4759	20.6496	28.3022	OK
Alg6	-	-	Alg6	Alg6	TSS10989	chr4:99382320-99430151	-	-	4.67678	3.83712	5.51644	OK	3.93019	3.24881	4.61156	OK	9.39127	7.92132	10.8612	OK
Alg8	-	-	Alg8	Alg8	TSS17425	chr7:104520126-104540668	-	-	4.63776	3.681	5.59452	OK	2.7039	2.0872	3.32059	OK	15.5292	13.101	17.9573	OK
Alg9	-	-	Alg9	Alg9	TSS1649	chr9:50583434-50651633	-	-	8.53696	7.13463	9.93929	OK	6.17207	5.13413	7.21001	OK	8.80331	7.40395	10.2027	OK
Alk	-	-	Alk	Alk	TSS21037	chr17:72218327-72953647	-	-	0.0849693	0.0401794	0.129759	OK	0.263381	0.170402	0.35636	OK	0.0965287	0.0501471	0.14291	OK
Alkbh1	-	-	Alkbh1	Alkbh1	TSS21493	chr12:88769027-88813249	-	-	6.68057	4.42116	8.93999	OK	4.69021	3.03956	6.34086	OK	8.42362	5.21662	11.6306	OK
Alkbh2	-	-	Alkbh2	Alkbh2	TSS11441	chr5:114573942-114578185	-	-	2.5926	1.74514	3.44005	OK	1.64605	1.03858	2.25351	OK	9.76929	7.75199	11.7866	OK
Alkbh3	-	-	Alkbh3	Alkbh3	TSS17387	chr2:93820790-93850887	-	-	6.57193	5.15374	7.99012	OK	5.18208	4.05033	6.31384	OK	20.4185	17.1826	23.6544	OK
Alkbh4	-	-	Alkbh4	Alkbh4	TSS23940	chr5:136614650-136617484	-	-	2.07377	1.47206	2.67548	OK	1.79397	1.26919	2.31876	OK	2.8867	2.18047	3.59292	OK
Alkbh5	-	-	Alkbh5	Alkbh5	TSS15145	chr11:60351184-60372014	-	-	20.4306	16.7822	24.079	OK	18.3609	15.0295	21.6923	OK	19.5021	15.9138	23.0905	OK
Alkbh6	-	-	Alkbh6	Alkbh6	TSS10368	chr7:31093771-31099322	-	-	27.0238	22.6283	31.4192	OK	17.6781	14.6461	20.71	OK	33.1471	27.9335	38.3606	OK
Alkbh7	-	-	Alkbh7	Alkbh7	TSS15945	chr17:57136761-57138759	-	-	5.50054	3.94225	7.05883	OK	4.18881	2.97193	5.4057	OK	11.9058	9.46962	14.3421	OK
Alkbh8	-	-	Alkbh8	Alkbh8	TSS23841	chr9:3335230-3385846	-	-	2.64965	2.01789	3.28141	OK	2.40017	1.8693	2.93104	OK	1.84242	1.39058	2.29426	OK
Allc	-	-	Allc	Allc	TSS14619	chr12:29238619-29267348	-	-	0	0	0	OK	0	0	0	OK	0	0	0	OK
Alms1	-	-	Alms1	Alms1	TSS13283	chr6:85537524-85652745	-	-	3.40846	2.87221	3.94472	OK	3.43594	2.89688	3.975	OK	1.33477	1.11267	1.55686	OK
Alox12	-	-	Alox12	Alox12	TSS23538	chr11:70054956-70068843	-	-	0.0388733	0.00639253	0.071354	OK	0.836362	0.587073	1.08565	OK	0.111501	0.0497752	0.173227	OK
Alox12b	-	-	Alox12b	Alox12b	TSS1792	chr11:68970573-68983293	-	-	0.0493129	0.00788558	0.0907402	OK	0.0742564	0.0222469	0.126266	OK	0	0	0	OK
Alox12e	-	-	Alox12e	Alox12e	TSS23073	chr11:70129114-70136020	-	-	0	0	0	OK	0.00501962	0	0.014771	OK	0	0	0	OK
Alox15	-	-	Alox15	Alox15	TSS6194	chr11:70157648-70165533	-	-	0.129554	0.0498057	0.209302	OK	0.0419135	0.00741453	0.0764124	OK	0	0	0	OK
Alox5	-	-	Alox5	Alox5	TSS4250	chr6:116360088-116411196	-	-	0.0098804	0	0.0236341	OK	0.0255129	0.00219826	0.0488276	OK	0	0	0	OK
Alox5ap	-	-	Alox5ap	Alox5ap	TSS13522	chr5:150076633-150099623	-	-	2.27784	1.44484	3.11084	OK	1.58618	0.968001	2.20436	OK	0.0844437	0.00206153	0.166826	OK
Alox8	-	-	Alox8	Alox8	TSS12100	chr11:68997386-69011341	-	-	1.1066	0.796453	1.41675	OK	0.851849	0.610525	1.09317	OK	0	0	0	OK
Aloxe3	-	-	Aloxe3	Aloxe3	TSS22552	chr11:68939878-68962617	-	-	0.511718	0.30998	0.713455	OK	0.505065	0.314824	0.695306	OK	0.12444	0.0536724	0.195208	OK
Alpi	-	-	Alpi	Alpi	TSS9752	chr1:88994578-88998181	-	-	0.891597	0.561153	1.22204	OK	0	0	0	OK	0	0	0	OK
Alpk1	-	-	Alpk1	Alpk1	TSS3150	chr3:127373227-127483445	-	-	0.200553	0.114123	0.286982	OK	0.334588	0.22065	0.448526	OK	0	0	0	OK
Alpk2	-	-	Alpk2	Alpk2	TSS8976	chr18:65425185-65553542	-	-	0.000621793	0	0.0026942	OK	0.00278223	0	0.00660409	OK	0.00357626	0	0.00798146	OK
Alpk3	-	-	Alpk3	Alpk3	TSS8353	chr7:88202485-88250498	-	-	0.0502431	0.0198513	0.0806349	OK	0.0485839	0.0208804	0.0762874	OK	0.0129433	0.00187109	0.0240155	OK
Alpl	-	-	Alpl	Alpl	TSS1499	chr4:137297646-137352292	-	-	0.0490013	0.00911399	0.0888887	OK	0.936819	0.648763	1.22488	OK	0.0232109	0.00056665	0.0458552	OK
Alppl2	-	-	Alppl2	Alppl2	TSS5325	chr1:88983265-88986503	-	-	0.0022587	0	0.00978686	OK	0	0	0	OK	0	0	0	OK
Als2	-	-	Als2	Als2	TSS2512,TSS8731	chr1:59177778-59294075	-	-	6.54475	5.34493	7.74456	OK	5.66944	4.67682	6.66206	OK	7.43015	6.15131	8.709	OK
Als2cl	-	-	Als2cl	Als2cl	TSS20353,TSS20699	chr9:110782677-110803034	-	-	0.256758	0.145038	0.368478	OK	1.78084	1.43915	2.12253	OK	0	0	0	OK
Als2cr11	-	-	Als2cr11	Als2cr11	TSS11763	chr1:59107349-59151744	-	-	0.00339875	0	0.0125593	OK	0.00228293	0	0.0085549	OK	0.0128924	0	0.0287732	OK
Als2cr12	-	-	Als2cr12	Als2cr12	TSS4791	chr1:58714963-58752833	-	-	0.00896191	0	0.0261201	OK	0.0154465	0	0.0348857	OK	0	0	0	OK
Als2cr4	-	-	Als2cr4	Als2cr4	TSS22878,TSS6743	chr1:59157436-59176940	-	-	4.10857	3.20176	5.01539	OK	3.35863	2.57689	4.14038	OK	9.31766	7.73779	10.8975	OK
Alx1	-	-	Alx1	Alx1	TSS7069	chr10:102470480-102491411	-	-	0	0	0	OK	0	0	0	OK	0	0	0	OK
Alx3	-	-	Alx3	Alx3	TSS1031	chr3:107397948-107408687	-	-	0	0	0	OK	0	0	0	OK	0	0	0	OK
Alx4	-	-	Alx4	Alx4	TSS3975	chr2:93482590-93521496	-	-	0.00544998	0	0.0129062	OK	0.0363873	0.012103	0.0606717	OK	0.00538526	0	0.0120188	OK
Amac1	-	-	Amac1	Amac1	TSS7981	chr11:69573386-69575346	-	-	0.190313	0.0678966	0.312729	OK	0.174745	0.0645825	0.284908	OK	0.0630885	0.00912007	0.117057	OK
Amacr	-	-	Amacr	Amacr	TSS9603	chr15:10911510-10926379	-	-	2.63669	2.03679	3.23658	OK	1.56472	1.1709	1.95853	OK	3.13259	2.51202	3.75316	OK
Ambn	-	-	Ambn	Ambn	TSS13588	chr5:88885035-88897554	-	-	0	0	0	OK	0	0	0	OK	0	0	0	OK
Ambp	-	-	Ambp	Ambp	TSS18193	chr4:62804312-62815176	-	-	6.86344	5.39511	8.33178	OK	8.56654	6.95257	10.1805	OK	0.369049	0.174238	0.56386	OK
Ambra1	-	-	Ambra1	Ambra1	TSS23907	chr2:91570294-91759006	-	-	11.6207	9.58668	13.6547	OK	11.8137	9.766	13.8613	OK	9.32716	7.90854	10.7458	OK
Amd1	-	-	Amd1	Amd1	TSS557	chr10:40007264-40021992	-	-	12.5836	9.97044	15.1969	FAIL	8.13833	6.3626	9.91406	OK	14.0846	11.8251	16.3441	OK
Amd2	-	-	Amd2	Amd2	TSS557	chr10:40007264-40021992	-	-	7.76897	5.69501	9.84293	LOWDATA	6.70024	5.08461	8.31588	LOWDATA	0.0273201	0	0.22082	LOWDATA
Amdhd1	-	-	Amdhd1	Amdhd1	TSS6487	chr10:92986082-93002778	-	-	0.0199131	0	0.0423944	OK	0.0320388	0.00345392	0.0606236	OK	0.0244067	0.000595843	0.0482176	OK
Amdhd2	-	-	Amdhd2	Amdhd2	TSS1521	chr17:24292799-24300700	-	-	5.37569	4.1937	6.55767	OK	4.07568	3.11351	5.03784	OK	11.3813	9.44818	13.3144	OK
Amelx	-	-	Amelx	Amelx	TSS8644	chrX:165233030-165742367	-	-	0	0	0	OK	0.0217983	0	0.124401	OK	0	0	0	OK
Amfr	-	-	Amfr	Amfr	TSS2672	chr8:96495487-96536540	-	-	45.9414	36.9999	54.8828	OK	34.0824	27.6614	40.5034	OK	66.0159	50.0506	81.9812	OK
[truncated: 19,884 more rows]
