# Supplementary material for: A Whole-Genome RNA Interference Screen Reveals a Role for Spry2 in Insulin Transcription and the Unfolded Protein Response
Source: Oxford University Press journal article supplement (doi:10.2337/db16-0962), 2017-02-28
Supplement: db160962supplementarydata3.xlsx [file db160962supplementarydata3.xlsx]

## Sheet: Sheet1
Supplemental Table 2: p values (t-test) of siRNAs relative to control siRNA in confirmation assay
BH- prefix indicates Benjamini Hochberg adjusted p values for multiple testing.
Bold indicates the siRNA increased GFP/mCherry.
Italics indicate a p value > 0.05.
siRNA	Fluorescence	BH-Fluorescence	Pre-Ins1 mRNA	BH-Pre-Ins1 mRNA	Alias, Notes
Brd4_1	6.5335e-07	1.18042e-06
Brd4_3	1.76371e-10	4.68226e-10
Sec23b_1	2.06232e-22	5.8092e-21	0.00888798	0.0162732
Sec23b_2	2.83465e-27	1.3301e-25	8.27049e-06	0.000791486
Glis3_1	1.55639e-33	2.1996e-31	0.000847811	0.003816
Glis3_2	6.4135e-15	3.0127e-14	0.00906796	0.016326
Glis3_3	1.91923e-16	1.17704e-15	0.0016173	0.00530182
Hspa5_5	1.43682e-11	4.23e-11	0.700253	0.72
Hspa5_7	3.2706e-14	1.269e-13	0.0187902	0.0295826
Gbf1_1	8.97104e-16	4.68433e-15	0.00180135	0.00542842
Gbf1_3	5.05159e-18	5.08607e-17	0.00066427	0.00341486
Zc3hc1_1	1.41301e-12	4.418e-12
Zc3hc1_2	0.00182413	0.00242094
Brunol4_2	3.66446e-18	3.96969e-17
Brunol4_4	1.24122e-18	1.457e-17
Synpo_3	0.0656348	0.0752
Synpo_4	0.000902616	NS
Zbtb7a_2	0.0396536	0.046262
Zbtb7a_3	6.43548e-08	1.41881e-07
Spen_1	2.2272e-07	4.30726e-07
Spen_2	0.00654936	NS
Fam40a_1	4.65806e-17	3.45821e-16
Fam40a_2	0.00392925	0.00503755
LOC637796_2	0.00383449	0.0049544	0.0189496	0.0295826	Mff
LOC637796_3	1.77668e-12	5.34e-12	0.00670165	0.0134116
Pdx1_1	3.31616e-14	1.269e-13	0.00155134	0.00530182
Pdx1_2	9.83236e-08	1.98004e-07	0.0068269	0.0134116
Pdx1_4	0.263981	0.27988	0.0664911	0.0861429
Pes1_1	3.07643e-17	2.55459e-16	0.00206485	0.00552857
Pes1_2	3.32925e-14	1.269e-13	0.0205495	0.0316286
C77080_2	1.98765e-13	6.68071e-13	0.00246815	0.00574468
C77080_3	2.86986e-06	4.935e-06	0.10963	0.132
Zfp606_3	2.62455e-10	6.84111e-10	0.00036946	0.00249075
Zfp606_4	0.000152244	0.000220948	0.0377572	0.0530182
C230021P08Rik_3	1.98721e-07	3.89708e-07	0.0021477	0.00552857	Nckap5l
C230021P08Rik_4	0.0163119	0.0191525	0.00148527	0.00530182
Upf1_2	1.6867e-14	7.00853e-14	0.185928	0.220747	Rent1
Upf1_6	1.19501e-09	2.91724e-09	0.0119983	0.0209032
Copb1_4	4.51276e-21	9.08443e-20	0.00203226	0.00552857
Copb1_5	9.36444e-21	1.4664e-19	0.00114582	0.0046
Tigd2_1	9.18242e-15	4.17542e-14	0.349764	0.389691
Tigd2_4	0.00594887	0.00735921	0.72123	0.727738
Pitpnm2_1	5.13757e-06	8.42721e-06	0.464612	0.50436
Pitpnm2_2	0.00484995	0.0061058	0.200176	0.234783
Smcr7l_1	0.00339845	0.00443889	0.0100609	0.017882	Mid51
Smcr7l_2	6.71809e-08	1.45772e-07	0.0570738	0.0752049
Znrf1_2	3.18626e-05	4.94275e-05	3.33065e-05	0.000791486
Znrf1_4	1.12436e-05	1.77438e-05	0.00239647	0.00574468
Neurod1_1	3.61134e-31	2.54505e-29	0.00190725	0.00542842
Neurod1_6	0.270678	0.285157	0.0960983	0.117941
Neurod1_7	9.18372e-08	1.9035e-07	0.0241739	0.0359507
Gpn1_2	4.18911e-06	6.95047e-06
Gpn1_3	0.000775704	NS
Cltc_2	1.58068e-14	6.75091e-14	0.000769793	0.00378
Cltc_4	1.81581e-15	9.165e-15	0.000127041	0.001188
Ptbp1_1	1.45915e-09	3.48915e-09	4.51421e-05	0.000791486
Ptbp1_2	2.00923e-16	1.18088e-15	3.82642e-05	0.000791486
Zfp612_1	0.00177519	0.00239029
Zfp612_4	0.437555	0.454103
Rps6kb2_1	4.37612e-15	2.12959e-14	0.00186506	0.00542842
Rps6kb2_2	0.00891987	0.0106586	0.00250319	0.00574468
Spry2_4	4.96897e-11	1.40154e-10	0.00215217	0.00552857
Spry2_6	6.88112e-08	1.46982e-07	0.107183	0.129843
Hnrpu_6	3.0664e-06	5.15321e-06	0.538693	0.570706
Hnrpu_7	0.784641	0.790607	0.0521013	0.0694667
Immt_2	9.14951e-21	1.4664e-19	0.000808011	0.00379409
Immt_3	4.06466e-14	1.50647e-13	0.0126228	0.0216
Ptch2_6	9.77818e-07	NS
Ptch2_4	0.292019	0.304978
Ahctf1_2	3.98878e-05	6.11511e-05	0.000284974	0.00219857
Ahctf1_3	3.16312e-13	1.03619e-12	0.00239989	0.00574468
Chka_1	2.2185e-17	1.95637e-16	0.066951	0.0861429
Chka_2	5.41559e-13	1.73686e-12	0.000132047	0.001188
Aqr_3	1.5532e-05	2.42833e-05	6.19904e-05	0.0008064
Aqr_4	6.49278e-11	1.79429e-10	2.20979e-05	0.000791486
Gins1_1	2.56334e-07	NS
Gins1_3	6.25354e-07	1.14448e-06
2610020H08Rik_1	0.535149	0.54663
2610020H08Rik_2	1.01386e-16	7.1205e-16
Ercc1_4	0.0078424	0.00952966	0.0238608	0.0359507
Ercc1_5	3.07906e-11	8.86286e-11	0.0161111	0.0263455
Hist3h2a_2	9.008e-06	1.46024e-05	0.343843	0.387
Hist3h2a_3	1.97988e-06	3.44667e-06	0.00283047	NS
Ypel4_1	2.55229e-07	4.8128e-07	0.0143257	0.0241312
Ypel4_3	1.62047e-12	4.96565e-12	0.00111321	0.0046
Cox6b1_1	3.83573e-19	4.92218e-18	0.00171971	0.00542842
Cox6b1_2	4.33133e-09	1.00087e-08	0.00180569	0.00542842
Wfs1_1	0.00208196	0.00274093	0.000311521	0.0022464
Wfs1_6	1.97422e-17	1.8518e-16	0.000256223	0.00212677
Cox6c_3	2.83387e-10	7.22625e-10	0.0457808	0.06183
Cox6c_4	1.28188e-16	8.20364e-16	0.00683481	0.0134116
Ssbp3_1	0.0998265	0.111024
Ssbp3_3	0.0820472	0.0932419
Map2k2_4	2.86782e-10	7.22625e-10	0.854319	0.854
Map2k2_2	0.00439725	NS	0.0283449	0.040752
Vdr_4	0.100062	0.111024	0.00151344	0.00530182
4930550C14Rik_3	0.0100264	0.0118487	0.000547952	0.00311495
4930550C14Rik_2	8.78114e-08	1.84773e-07	0.00139715	0.00530182
Stk25_1	0.00790605	NS
Stk25_3	0.000132364	0.000193875
Ppp2ca_4	3.26697e-10	8.08895e-10	0.0455446	0.06183
Ppp2ca_3	1.09841e-16	7.38571e-16	0.000103441	0.0011124
Lrrn1_1	1.11396e-13	3.91275e-13	0.437297	0.481592
Lrrn1_3	2.95262e-16	1.6638e-15	0.0243067	0.0359507
Gpr161_4	0.513948	0.529007	0.261543	0.301021
Gpr161_2	0.0491914	0.0568623	0.0847199	0.10589
Cox7a2_3	1.94579e-07	3.87254e-07	0.00794274	0.0151389
Cox7a2_4	8.86363e-05	0.000131501	0.00413926	0.0090936
Pla2g2c_4	1.8162e-13	6.25902e-13	0.21692	0.252
Pla2g2c_3	0.000260533	0.000371727	0.571402	0.598718
Vegfa_6	5.31395e-07	9.85145e-07	0.0852859	0.10589
Vegfa_4	6.87575e-09	1.56465e-08	0.662028	0.687462
Pde1c_1	1.47462e-06	2.59087e-06	0.337071	0.383116
Pde1c_7	0.000856969	0.00117317	0.0165947	0.0267582
5730470L24Rik_4	0.889634	0.89
Gpr3_5	0.115721	0.127781	0.467097	0.50436
Gpr3_6	7.42383e-05	0.000112497	0.043709	0.0605077
Kcnj6_2	1.22047e-25	4.3005e-24	0.000618027	0.0033372
Kcnj6_3	8.95029e-16	NS	0.00247809	0.00574468
Atp5b_6	5.10143e-14	NS
Atp5b_5	0.000232917	0.000335235
T2_3	0.187247	0.201275	0.522327	0.558178
T2_1	8.37812e-09	1.87552e-08	0.00852562	0.0158834
Atp5a1_4	9.53438e-08	1.94743e-07	0.0159576	0.0263455
Atp5a1_2	7.9167e-05	0.0001188	0.00161262	0.00530182
Atp5j2_2	0.00594949	0.00735921	4.35305e-05	0.000791486
Atp5j2_3	4.5752e-22	1.0763e-20	0.000450736	0.002706
Rps6kb1_4	0.000647982	0.000904634	0.00555858	0.0115477
Rps6kb1_3	0.000365584	0.00051606	0.0792819	0.100758
Rxra_3	1.69038e-10	4.5825e-10
Rxra_4	0.667973	0.677612
Dpp3_2	0.0951664	0.107386	0.0254841	0.0372162
Dpp3_6	0.233178	0.248886	0.000986791	0.00426384
Gprk5_1	3.0414e-06	NS	0.00799159	0.0151389
Gprk5_2	1.02477e-05	NS	0.00039699	0.00252212
Gpr75_4	2.14636e-20	3.0315e-19	5.12754e-05	0.000791486
Gpr75_6	4.61535e-17	3.45821e-16	6.7211e-05	0.0008064
Hook1_1	2.73489e-09	6.4155e-09	0.031639	0.0449053
Hook1_4	0.130986	0.143186	0.71341	0.726453
Gpr142_4	9.88377e-15	4.35337e-14	0.00481343	0.0101859
Gpr142_6	0.180306	0.195231	0.00420625	NS

## Sheet: Sheet2
clec2f??
brunol4
