# Supplementary material for: A Whole-Genome RNA Interference Screen Reveals a Role for Spry2 in Insulin Transcription and the Unfolded Protein Response
Source: Oxford University Press journal article supplement (doi:10.2337/db16-0962), 2017-02-28
Supplement: db160962supplementarydata4.xlsx [file db160962supplementarydata4.xlsx]

## Sheet: List_FPKM.txt
Supplemental Table 3
RPKM of hits from RNAi screen. Data are from Cnop M, et al. (2014) RNA sequencing identifies dysregulation of the human pancreatic islet transcriptome by the saturated fatty acid palmitate. Diabetes 63(6):1978-1993.
gene symbol	gene description	genomic location	RefSeq ID	mean - control	SD - control	median - control
AHCTF1	AT hook containing transcription factor 1	chr1:247002402-247094726C	NM_015446	10.6929	3.42664	11.0628
AQR	aquarius homolog (mouse)	chr15:35148553-35261995C	NM_014691	9.29363	1.20105	9.78468
ATP5A1	ATP synthase, H+ transporting, mitochondrial F1 complex, alpha subunit 1, cardiac muscle	chr18:43664110-43684199C	NM_004046	71.4687	15.0493	65.6456
ATP5J2	ATP synthase, H+ transporting, mitochondrial Fo complex, subunit F2	chr7:99055785-99063808C	NM_001003713	49.5981	7.24652	51.2457
ATP5J2	ATP synthase, H+ transporting, mitochondrial Fo complex, subunit F2	chr7:99055785-99063808C	NM_001003714	0.651236	0.77393	0.248857
ATP5J2	ATP synthase, H+ transporting, mitochondrial Fo complex, subunit F2	chr7:99055785-99063808C	NM_001039178	3.22264	6.44528	0
ATP5J2	ATP synthase, H+ transporting, mitochondrial Fo complex, subunit F2	chr7:99055785-99063808C	NM_004889	3.50323	3.23583	3.5079
C11orf65	chromosome 11 open reading frame 65	chr11:108253728-108338258C	NM_152587	0.311658	0.191719	0.4407
C77080	no human orthrolog known
CHKA	choline kinase alpha	chr11:67820328-67888858C	NM_001277	7.92995	1.87923	7.36047
CHKA	choline kinase alpha	chr11:67820328-67888858C	NM_212469	1.37438	1.07618	1.74142
CLTC	clathrin, heavy chain (Hc)	chr17:57697050-57774317W	NM_004859	19.4231	80.3143	76.3618
COPB1	coatomer protein complex, subunit beta 1	chr11:14479049-14521441C	NM_001144061	3.85863	1.9787	3.49347
COPB1	coatomer protein complex, subunit beta 1	chr11:14479049-14521441C	NM_001144062	7.62604	3.79393	7.94861
COPB1	coatomer protein complex, subunit beta 1	chr11:14479049-14521441C	NM_016451	11.7884	2.09064	11.5368
COX6B1	cytochrome c oxidase subunit VIb polypeptide 1 (ubiquitous)	chr19:36139125-36149685W	NM_001863	82.6897	13.9243	82.1921
COX6C	cytochrome c oxidase subunit VIc	chr8:100890372-100905895C	NM_004374	74.7598	16.7162	70.1108
COX7A2	cytochrome c oxidase subunit VIIa polypeptide 2 (liver)	chr6:75947393-75953644C	NM_001865	25.9997	7.49679	27.5009
COX7A2	cytochrome c oxidase subunit VIIa polypeptide 2 (liver)	chr6:75947393-75953644C	NR_029466	17.9024	11.6945	13.5609
DPP3	dipeptidyl-peptidase 3	chr11:66247880-66277130W	NM_005700	3.45358	4.13864	0.356529
DPP3	dipeptidyl-peptidase 3	chr11:66247880-66277130W	NM_130443	4.45055	3.63937	7.07903
ERCC1	excision repair cross-complementing rodent repair deficiency, complementation group 1 (includes overlapping antisense sequence)	chr19:45910591-45927177C	NM_001166049	0.893553	0.840955	0.603794
ERCC1	excision repair cross-complementing rodent repair deficiency, complementation group 1 (includes overlapping antisense sequence)	chr19:45910591-45927177C	NM_001983	3.28543	1.93055	2.99637
ERCC1	excision repair cross-complementing rodent repair deficiency, complementation group 1 (includes overlapping antisense sequence)	chr19:45910591-45927177C	NM_202001	6.29646	1.42998	5.35051
GBF1	golgi brefeldin A resistant guanine nucleotide exchange factor 1	chr10:104005309-104142649W	NM_004193	26.2519	6.09894	26.8011
GLIS3	GLIS family zinc finger 3	chr9:3824128-4300035C	NM_001042413	7.88011	1.74872	7.53673
GLIS3	GLIS family zinc finger 3	chr9:3824128-4300035C	NM_152629	6.49655	3.78379	5.25027
GPR142	G protein-coupled receptor 142	chr17:72363645-72368739W	NM_181790	3.84515	2.30339	2.54517
GPR3	G protein-coupled receptor 3	chr1:27719152-27722315W	NM_005281	0.920939	0.456767	0.958891
GPR75	G protein-coupled receptor 75	chr2:53897118-54087170C	NM_006794	1.84618	1.00314	1.67887
GRK5	G protein-coupled receptor kinase 5	chr10:120967197-121215130W	NM_005308	2.10971	1.2433	1.7128
HOOK1	hook homolog 1 (Drosophila)	chr1:60280533-60342049W	NM_015888	14.1546	4.61736	13.8983
HSPA5	heat shock 70kDa protein 5 (glucose-regulated protein, 78kDa)	chr9:127997127-128003661C	NM_005347	334.666	157.724	261.233
IMMT	inner membrane protein, mitochondrial	chr2:86371056-86422893C	NM_001100169	10.3278	2.65637	10.3377
IMMT	inner membrane protein, mitochondrial	chr2:86371056-86422893C	NM_001100170	6.40371	2.55682	6.76878
IMMT	inner membrane protein, mitochondrial	chr2:86371056-86422893C	NM_006839	0	0	0
KCNJ6	potassium inwardly-rectifying channel, subfamily J, member 6	chr21:38996786-39288696C	NM_002240	3.64552	1.80917	3.86524
LRRN1	leucine rich repeat neuronal 1	chr3:3841121-3889386W	NM_020873	4.63752	1.66408	3.719
MAP2K2	mitogen-activated protein kinase kinase 2	chr19:4090329-4124126C	NM_030662	21.2187	10.6719	26.6444
MFF	mitochondrial fission factor	chr2:228192228-228222547W	NM_020194	21.7229	7.28127	22.3785
NCKAP5L	NCK-associated protein 5-like	chr12:50184929-50222208C	NM_001037806	6.61639	1.63453	6.25482
NEUROD1	neurogenic differentiation 1	chr2:182541195-182545381C	NM_002500	67.8839	26.6939	60.0135
PDE1C	phosphodiesterase 1C, calmodulin-dependent 70kDa	chr7:31829248-32110991C	NM_005020	1.60909	1.05088	1.11427
PDX1	pancreatic and duodenal homeobox 1	chr13:28494168-28500451W	NM_000209	114.648	30.7303	105.011
PES1	pescadillo homolog 1, containing BRCT domain (zebrafish)	chr22:30972612-30987894C	NM_014303	16.839	4.21049	16.6937
PPP2CA	protein phosphatase 2, catalytic subunit, alpha isozyme	chr5:133532149-133561950C	NM_002715	49.6094	9.39792	46.6699
PTBP1	polypyrimidine tract binding protein 1	chr19:797392-812327W	NM_002819	21.3636	9.91922	17.3373
PTBP1	polypyrimidine tract binding protein 1	chr19:797392-812327W	NM_031990	0.180978	0.361956	0
PTBP1	polypyrimidine tract binding protein 1	chr19:797392-812327W	NM_031991	16.6455	4.49258	16.2623
RPS6KB1	ribosomal protein S6 kinase, 70kDa, polypeptide 1	chr17:57970443-58027784W	NM_003161	7.97175	0.901932	8.0189
RPS6KB2	ribosomal protein S6 kinase, 70kDa, polypeptide 2	chr11:67195935-67202878W	NM_003952	11.9658	6.578	11.9038
SEC23B	Sec23 homolog B (S. cerevisiae)	chr20:18488188-18542058W	NM_001172745	7.89098	3.51005	8.47089
SEC23B	Sec23 homolog B (S. cerevisiae)	chr20:18488188-18542058W	NM_001172746	6.16199	2.60118	6.56363
SEC23B	Sec23 homolog B (S. cerevisiae)	chr20:18488188-18542058W	NM_006363	1.00951	1.64278	0.173937
SEC23B	Sec23 homolog B (S. cerevisiae)	chr20:18488188-18542058W	NM_032985	1.4632	2.0233	0
SEC23B	Sec23 homolog B (S. cerevisiae)	chr20:18488188-18542058W	NM_032986	0.616609	0.714853	0.373078
SMCR7L	Smith-Magenis syndrome chromosome region, candidate 7-like	chr22:39898284-39914136W	NM_019008	10.971	1.55289	10.3675
SPRY2	sprouty homolog 2 (Drosophila)	chr13:80910114-80915086C	NM_005842	12.0281	3.00374	12.8176
T2	no human orthrolog known
WFS1	Wolfram syndrome 1 (wolframin)	chr4:6271577-6304991W	NM_001145853	12.7085	6.30192	11.4219
WFS1	Wolfram syndrome 1 (wolframin)	chr4:6271577-6304991W	NM_006005	15.5706	10.6804	12.9072
YPEL4	yippee-like 4 (Drosophila)	chr11:57412561-57417417C	NM_145008	1.12925	0.355316	1.04004
Zfp606	no human orthrolog known
ZNRF1	zinc and ring finger 1	chr16:75032915-75144892W	NM_032268	13.0965	2.73936	13.3787
