# Supplementary material for: A Whole-Genome RNA Interference Screen Reveals a Role for Spry2 in Insulin Transcription and the Unfolded Protein Response
Source: Oxford University Press journal article supplement (doi:10.2337/db16-0962), 2017-02-28
Supplement: db160962supplementarydata5.xlsx [file db160962supplementarydata5.xlsx]

## Sheet: Sheet1
Taqman probes and primers sequences:
name	forward primer seq	reverse primer seq	probe seq
Glucuronidase	CTCATCTGGAATTTCGCCGA	GGCGAGTGAAGATCCCCTTC	CGAACCAGTCACCGCTGAGAGTAATCG
beta-Actin	TTCAACACCCCAGCCATGTA	TGTGGTACGACCAGAGGCATAC	TAGCCATCCAGGCTGTGCTGTCCC
Cyclophilin	GGCCGATGACGAGCCC	TGTCTTTGGAACTTTGTCTGCAA	TGGGCCGCGTCTCCTTCGA
TBP	TCCCCCTCTGCACTGAAATC	AGTGCCGCCCAAGTAGCA	CTGCAGCACTACTGTGAGTTGCTTGCTCTGT
preInsulin 1	GGGACCACAAAGATGCTGTT	TGGGCTCCTCTCTTACATGG	CTGTTGGTGCACTTCCTACCCCTG
Spry2_4	CAAAATTTCCCCGTGGTTT	GCAAACTTTTTCCTTCTTTCCA	CCACCGATTGCTTGGAAGTTGGA
Spry2_5	GCTGCAAAGTTCCCACTGTC	GCGGAGCAACAATCCCTAT	CCCCCTAGGAACTTTGAAAAGCCGA
Spry2_6	ACCCAGCAGGTACACGTCTT	GTCTTGGGACCACAGTAGGG	CAGAGCCATCCGAAACACCAATGA
Wfs1_1	GCAGCAATATGGCTTCCTATG	GGTGGCTGCACAGGATCT	CCCCGGGCCTGGAAGGAAAC
Wfs1_6	GAGGTGGGCAAACACTACCT	GCTTGGCTGCCAGGATTA	CGCCTTGCCAACGATGCAGA
Wfs1_7	CCTCACTGGAGCAGGACAA	CTGCTTCCCCAGCACTTC	TTGAACCGCCTCGTGCTCCC
Actin (sybr)	CAGCTTCTTTGCAGCTCCTT	CTTCTCCATGTCGTCCCAGT
Xbp1 spliced (sybr)	AGCTTTTACGGGAGAAAACTC	GCCTGCACCTGCTGCG
